# Supplementary material for: Zinc-catalyzed reaction of isoxazoles with thioynol ethers involving an unprecedented 1,2-sulfur migration
Source: Royal Society of Chemistry journal article supplement (doi:10.1039/c8cc03140a), 2018-01-01

Supporting Information

**Zinc-catalyzed reaction of isoxazoles with thioynol ethers involving an  
unprecedented 1,2-sulfur migration**

Xin-Qi Zhu, Qing Sun, Zhi-Xin Zhang, Bo Zhou, Pei-Xi Xie, Wen-Bo Shen,  
Xin Lu,\* Jin-Mei Zhou, and Long-Wu Ye\*

*i*ChEM, State Key Laboratory of Physical Chemistry of Solid Surfaces and Key  
Laboratory for Chemical Biology of Fujian Province, College of Chemistry and Chemical  
Engineering, Xiamen University, Xiamen 361005, China

E-mail: [longwuye@xmu.edu.cn](mailto:longwuye@xmu.edu.cn); [xinlu@xmu.edu.cn](mailto:xinlu@xmu.edu.cn)

| <b>Content</b>                                       | <b>Page Number</b> |
|------------------------------------------------------|--------------------|
| <b>General</b>                                       | 2                  |
| <b>More Reaction Condition and Mechanism Studies</b> | 3                  |
| <b>Preparation of Starting Materials</b>             | 4                  |
| <b>General Procedure: Zinc Catalysis</b>             | 9                  |
| <b>Crystal Data</b>                                  | 29                 |
| <b>Computational Studies</b>                         | 30                 |
| <b><sup>1</sup>H and <sup>13</sup>C NMR Spectra</b>  | 56                 |

**General Information.** Ethyl acetate (ACS grade), hexanes (ACS grade) and anhydrous 1,2-dichloroethane (ACS grade) were obtained commercially and used without further purification. Methylene chloride, tetrahydrofuran and diethyl ether were purified according to standard methods unless otherwise noted. Commercially available reagents were used without further purification. Reactions were monitored by thin layer chromatography (TLC) using silicycle pre-coated silica gel plates. Flash column chromatography was performed over silica gel (300-400 mesh). Infrared spectra were recorded on a Nicolet AVATER FTIR330 spectrometer as thin film and are reported in reciprocal centimeter ( $\text{cm}^{-1}$ ). Mass spectra were recorded with Micromass QTOF2 Quadrupole/Time-of-Flight Tandem mass spectrometer using electron spray ionization.

$^1\text{H}$  NMR spectra were recorded on a Bruker AV-400 spectrometer and a Bruker AV-500 spectrometer in chloroform- $\text{d}_3$ . Chemical shifts are reported in ppm with the internal TMS signal at 0.0 ppm as a standard. The data is being reported as (s = singlet, d = doublet, t = triplet, m = multiplet or unresolved, brs = broad singlet, coupling constant(s) in Hz, integration).

$^{13}\text{C}$  NMR spectra were recorded on a Bruker AV-400 spectrometer and a Bruker AV-500 spectrometer in chloroform- $\text{d}_3$ . Chemical shifts are reported in ppm with the internal chloroform signal at 77.0 ppm as a standard.

## More Reaction Condition and Mechanism Studies

1. Other reaction condition studies on the reaction of thioynol ether **1a** with isoxazole **2a**.<sup>a</sup>

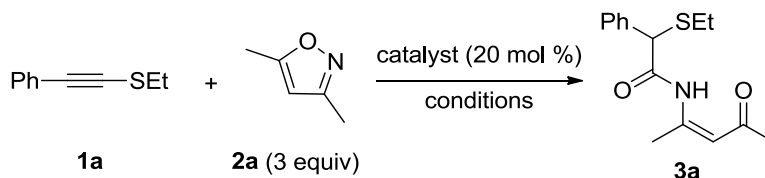

| Entry          | Catalyst                                            | Reaction conditions | Yield <sup>b</sup> (%) |           |
|----------------|-----------------------------------------------------|---------------------|------------------------|-----------|
|                |                                                     |                     | <b>3a</b>              | <b>1a</b> |
| 1              | Cy-JohnPhosAuNTf <sub>2</sub> (10 mol %)            | DCE, 60 °C, 24 h    | <1                     | >90       |
| 2 <sup>c</sup> | (ArO) <sub>3</sub> PAuNTf <sub>2</sub> (10 mol %)   | DCE, 60 °C, 24 h    | <1                     | >90       |
| 3              | CF <sub>3</sub> CO <sub>2</sub> H                   | DCE, 60 °C, 24 h    | <1                     | >90       |
| 4              | MsOH                                                | DCE, 60 °C, 24 h    | <1                     | >90       |
| 5              | Zn(OTf) <sub>2</sub>                                | DCE, 60 °C, 24 h    | 38                     | 30        |
| 6              | Cu(OTf) <sub>2</sub>                                | DCE, 60 °C, 24 h    | <1                     | <2        |
| 7              | Sc(OTf) <sub>3</sub>                                | DCE, 60 °C, 24 h    | 18                     | 52        |
| 8              | In(OTf) <sub>3</sub>                                | DCE, 60 °C, 24 h    | 11                     | 63        |
| 9              | NaBARF                                              | DCE, 60 °C, 24 h    | 21                     | 25        |
| 10             | Zn(OTf) <sub>2</sub> /NaBARF (20 mol %)             | DCE, 60 °C, 18 h    | 58                     | <2        |
| 11             | ZnCl <sub>2</sub> /NaBARF (20 mol %)                | DCE, 60 °C, 18 h    | 55                     | <2        |
| 12             | Zn(OTf) <sub>2</sub> /AgNTf <sub>2</sub> (20 mol %) | DCE, 60 °C, 24 h    | 29                     | 30        |
| 13             | Zn(OTf) <sub>2</sub> /AgPF <sub>6</sub> (20 mol %)  | DCE, 60 °C, 24 h    | 23                     | 34        |

<sup>a</sup> Reaction conditions: [**1a**] = 0.05 M, in vials. <sup>b</sup> Measured by <sup>1</sup>H NMR using diethyl phthalate as the internal standard. <sup>c</sup> Ar = 2,4-di-*tert*-butylphenyl

2. The control experiment with H<sub>2</sub><sup>18</sup>O isotopic labeling proved that the oxygen atom in the amide group of **3a** originates from water.

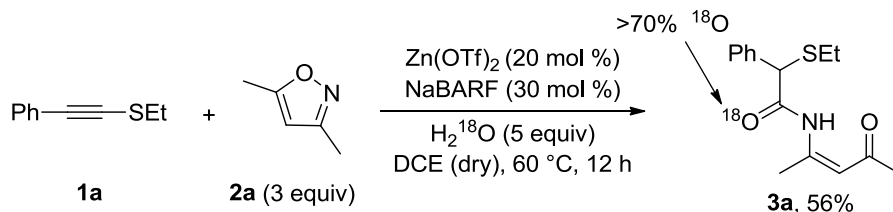

## Representative synthetic procedures for the preparation of thioynol ethers 1:<sup>1</sup>

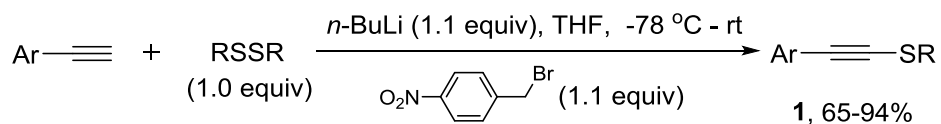

### ethyl(phenylethynyl)sulfane (1a)

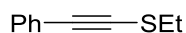

**1a**

This compound is known and the spectroscopic data match those reported.<sup>2</sup> <sup>1</sup>H NMR (400 MHz, CDCl<sub>3</sub>) δ 7.45 – 7.36 (m, 2H), 7.32 – 7.22 (m, 3H), 2.80 (q, *J* = 7.3 Hz, 2H), 1.44 (t, *J* = 7.3 Hz, 3H); <sup>13</sup>C NMR (100 MHz, CDCl<sub>3</sub>) δ 131.3, 128.2, 127.9, 123.5, 93.4, 29.9, 14.4.

### ethyl((4-fluorophenyl)ethynyl)sulfane (1b)

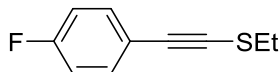

**1b**

This compound is known and the spectroscopic data match those reported.<sup>2</sup> <sup>1</sup>H NMR (400 MHz, CDCl<sub>3</sub>) δ 7.46 – 7.36 (m, 2H), 7.08 – 6.94 (m, 2H), 2.84 (q, *J* = 7.3 Hz, 2H), 1.47 (t, *J* = 7.3 Hz, 3H); <sup>13</sup>C NMR (100 Hz, CDCl<sub>3</sub>) δ 162.3 (d, *J* = 248.0 Hz), 133.4 (d, *J* = 9.0 Hz), 119.6 (d, *J* = 4.0 Hz), 115.5 (d, *J* = 21.0 Hz), 92.3, 78.9, 29.9, 14.7.

### ((4-chlorophenyl)ethynyl)(ethyl)sulfane (1c)

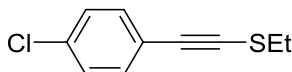

**1c**

This compound is known and the spectroscopic data match those reported.<sup>2</sup> <sup>1</sup>H NMR (400 MHz, CDCl<sub>3</sub>) δ 7.36 – 7.30 (m, 2H), 7.29 – 7.24 (m, 2H), 2.82 (q, *J* = 7.3 Hz, 2H), 1.45

(t,  $J = 7.3$  Hz, 3H);  $^{13}\text{C}$  NMR (100 MHz,  $\text{CDCl}_3$ )  $\delta$  133.9, 132.5, 128.6, 122.0, 92.3, 80.6, 29.9, 14.7.

**ethyl(*p*-tolylethynyl)sulfane (1d)**

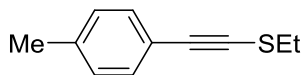

**1d**

This compound is known and the spectroscopic data match those reported.<sup>2</sup>  $^1\text{H}$  NMR (400 MHz,  $\text{CDCl}_3$ )  $\delta$  7.30 (d,  $J = 7.9$  Hz, 2H), 7.08 (d,  $J = 8.0$  Hz, 2H), 2.78 (q,  $J = 7.3$  Hz, 2H), 2.32 (s, 3H), 1.43 (t,  $J = 7.3$  Hz, 3H);  $^{13}\text{C}$  NMR (100 MHz,  $\text{CDCl}_3$ )  $\delta$  138.1, 131.4, 128.9, 120.4, 93.5, 78.1, 29.9, 21.4, 14.6.

**ethyl((3-fluorophenyl)ethynyl)sulfane (1e)**

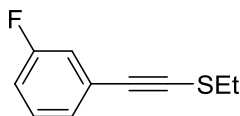

**1e**

Pale yellow oil.  $^1\text{H}$  NMR (500 MHz,  $\text{CDCl}_3$ )  $\delta$  7.23 – 7.19 (m, 1H), 7.16 – 7.14 (m, 1H), 7.09 – 7.06 (m, 1H), 6.97 – 6.93 (m, 1H), 2.79 (q,  $J = 7.3$  Hz, 2H), 1.43 (t,  $J = 7.3$  Hz, 3H);  $^{13}\text{C}$  NMR (125 MHz,  $\text{CDCl}_3$ )  $\delta$  162.2 (d,  $J = 245.0$  Hz), 129.7 (d,  $J = 8.8$  Hz), 126.9 (d,  $J = 2.5$  Hz), 125.3 (d,  $J = 10.0$  Hz), 117.8 (d,  $J = 22.5$  Hz), 115.0 (d,  $J = 21.3$  Hz), 92.3 (d,  $J = 2.5$  Hz), 80.9, 29.8, 14.6; IR (neat): 2958, 2899, 1654, 1580, 1450, 1325, 1189, 1075, 856, 652; HRESIMS Calcd for  $[\text{C}_{10}\text{H}_9\text{FNaS}]^+$  ( $\text{M} + \text{Na}^+$ ) 203.0301, found 203.0305.

**ethyl(*m*-tolylethynyl)sulfane (1f)**

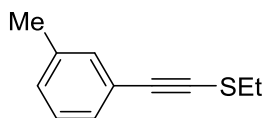

**1f**

Pale yellow oil.  $^1\text{H}$  NMR (500 MHz,  $\text{CDCl}_3$ )  $\delta$  7.24 – 7.18 (m, 2H), 7.14 (t,  $J = 7.6$  Hz, 1H), 7.09 – 7.00 (m, 1H), 2.76 (q,  $J = 7.3$  Hz, 2H), 2.28 (s, 3H), 1.42 (t,  $J = 7.3$  Hz, 3H);  $^{13}\text{C}$  NMR (125 MHz,  $\text{CDCl}_3$ )  $\delta$  137.9, 132.0, 128.9, 128.5, 128.1, 123.3, 93.6, 78.7, 30.0, 21.2, 14.7; IR (neat): 2989, 2875, 1650, 1582, 1420, 1314, 1154, 1014, 706; HRESIMS Calcd for  $[\text{C}_{11}\text{H}_{12}\text{NaS}]^+$  ( $\text{M} + \text{Na}^+$ ) 199.0552, found 199.0553.

**benzyl(phenylethynyl)sulfane (1g)**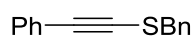**1g**

This compound is known and the spectroscopic data match those reported.<sup>2</sup>  $^1\text{H}$  NMR (400 MHz,  $\text{CDCl}_3$ )  $\delta$  7.40 – 7.29 (m, 7H), 7.29 – 7.24 (m, 3H), 4.01 (s, 2H);  $^{13}\text{C}$  NMR (100 MHz,  $\text{CDCl}_3$ )  $\delta$  136.5, 131.2, 129.0, 128.5, 128.2, 128.0, 127.7, 123.3, 94.6, 79.2, 40.3.

**ethyl((4-(trifluoromethyl)phenyl)ethynyl)sulfane (1h)**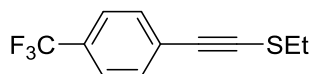**1h**

Pale yellow oil.  $^1\text{H}$  NMR (400 MHz,  $\text{CDCl}_3$ )  $\delta$  7.54 (d,  $J = 8.3$  Hz, 2H), 7.47 (d,  $J = 8.2$  Hz, 2H), 2.84 (q,  $J = 7.3$  Hz, 2H), 1.46 (t,  $J = 7.3$  Hz, 3H);  $^{13}\text{C}$  NMR (100 MHz,  $\text{CDCl}_3$ )  $\delta$  131.2, 129.4 (q,  $J = 32$  Hz), 127.4, 123.9 (q,  $J = 270$  Hz), 125.2 (q,  $J = 4$  Hz), 92.5, 82.9, 30.0, 14.7; IR (neat): 2934, 2887, 1658, 1584, 1440, 1333, 1257, 1153, 856, 652; HRESIMS Calcd for  $[\text{C}_{11}\text{H}_9\text{F}_3\text{NaS}]^+$  ( $\text{M} + \text{Na}^+$ ) 253.0269, found 253.0265.

**phenyl(phenylethynyl)sulfane (1i)**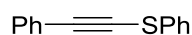**1i**

This compound is known and the spectroscopic data match those reported.<sup>1</sup> <sup>1</sup>H NMR (400 MHz, CDCl<sub>3</sub>) δ 7.55 – 7.44 (m, 4H), 7.37 – 7.16 (m, 6H); <sup>13</sup>C NMR (100 MHz, CDCl<sub>3</sub>) δ 132.9, 131.7, 129.2, 128.6, 128.3, 126.5, 126.2, 122.9, 97.9, 75.5.

**Representative synthetic procedures for the preparation of isoxazoles 2:**<sup>3,4</sup>

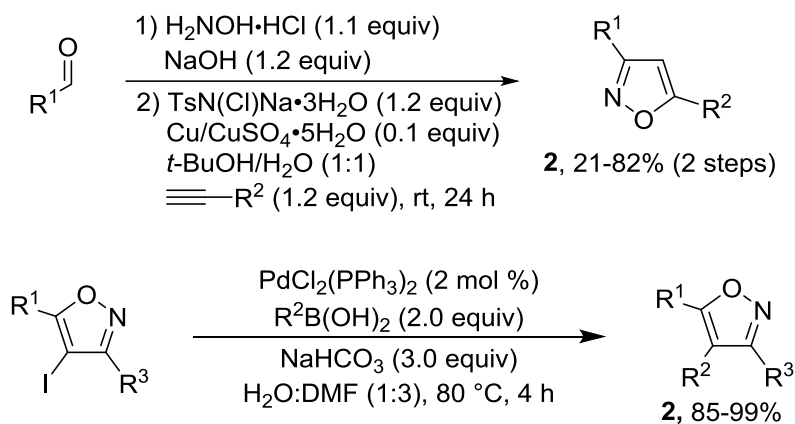

The data of isoxazoles **2b-2g** and **2j-2s** were reported in our previous work,<sup>4,5</sup> and compounds **2a** and **2t** are commercially available.

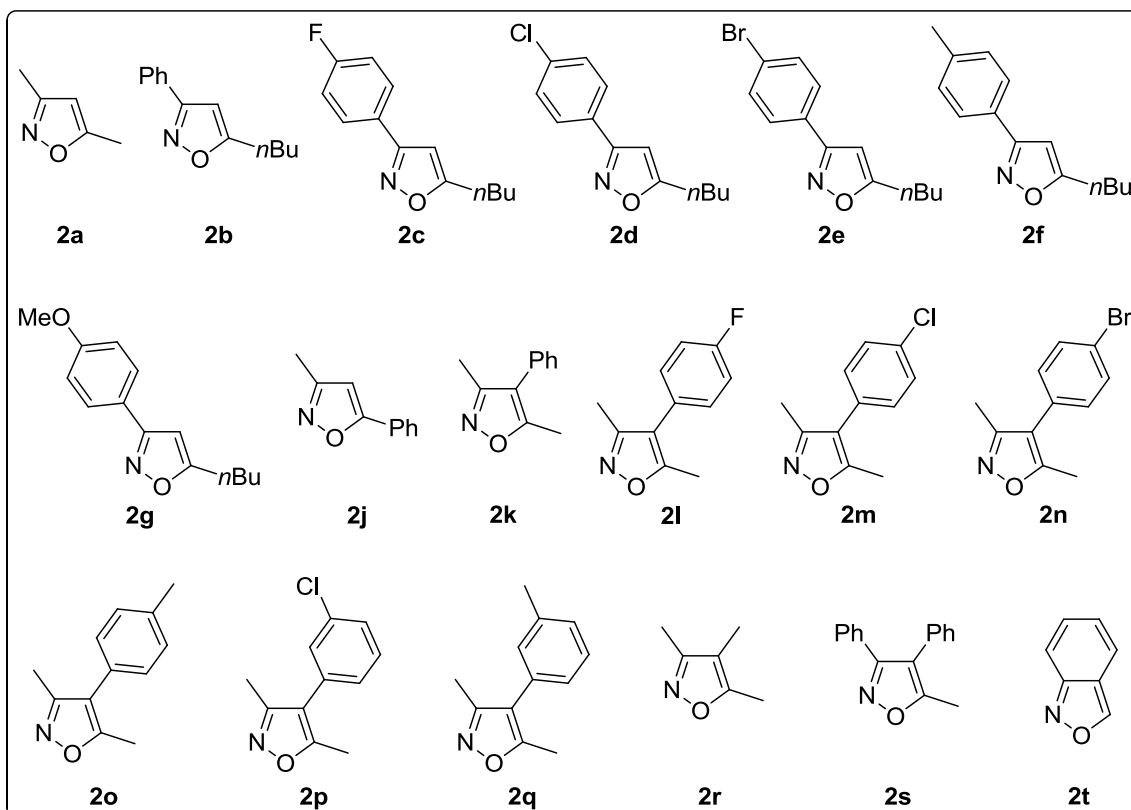

### 5-butyl-3-(3-chlorophenyl)isoxazole (2h)

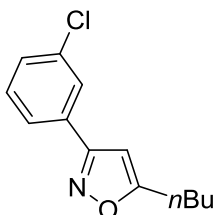

**2h**

Pale yellow oil.  $^1\text{H}$  NMR (500 MHz,  $\text{CDCl}_3$ )  $\delta$  7.78 (s, 1H), 7.67 (d,  $J = 7.0$  Hz, 1H), 7.41 – 7.35 (m, 2H), 6.27 (s, 1H), 2.79 (t,  $J = 7.6$  Hz, 2H), 1.76 – 1.70 (m, 2H), 1.46 – 1.39 (m, 2H), 0.96 (t,  $J = 7.4$  Hz, 3H);  $^{13}\text{C}$  NMR (125 MHz,  $\text{CDCl}_3$ )  $\delta$  174.7, 161.2, 134.8, 131.2, 130.1, 129.7, 126.8, 124.8, 98.7, 29.5, 26.4, 22.1, 13.6; IR (neat): 2960, 2934, 2875, 1596, 1457, 1415, 1079, 964, 783, 680; HRESIMS Calcd for  $[\text{C}_{13}\text{H}_{14}\text{ClNNaO}]^+$  ( $\text{M} + \text{Na}^+$ ) 258.0656, found 258.0655.

### 5-butyl-3-(*m*-tolyl)isoxazole (2i)

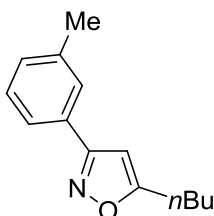

**2i**

Pale yellow oil.  $^1\text{H}$  NMR (400 MHz,  $\text{CDCl}_3$ )  $\delta$  7.63 (s, 1H), 7.56 (d,  $J = 7.7$  Hz, 1H), 7.31 (t,  $J = 7.6$  Hz, 1H), 7.21 (d,  $J = 7.6$  Hz, 1H), 6.26 (s, 1H), 2.76 (t,  $J = 7.6$  Hz, 2H), 2.38 (s, 3H), 1.75 – 1.67 (m, 2H), 1.46 – 1.37 (m, 2H), 0.95 (t,  $J = 7.4$  Hz, 3H);  $^{13}\text{C}$  NMR (100 MHz,  $\text{CDCl}_3$ )  $\delta$  174.1, 162.4, 138.5, 130.5, 129.3, 128.7, 127.3, 123.9, 98.8, 29.6, 26.5, 22.2, 21.4, 13.7; IR (neat): 2936, 2878, 2800, 1654, 1560, 1458, 1363, 834, 781, 669; HRESIMS Calcd for  $[\text{C}_{14}\text{H}_{17}\text{NNaO}]^+$  ( $\text{M} + \text{Na}^+$ ) 238.1202, found 238.1205.



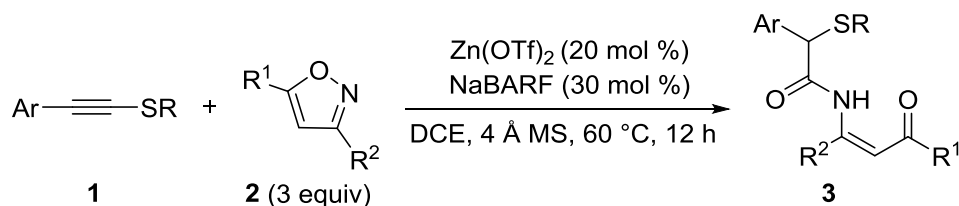

### General procedure for the synthesis of $\beta$ -keto enamides **3**:

NaBARF (0.09 mmol, 79.7 mg) and Zn(OTf)<sub>2</sub> (0.06 mmol, 21.8 mg) was added to a mixture of the thioynol ether **1** (0.30 mmol), isoxazole **2** (0.90 mol) and the 4 Å MS (200 mg) in DCE (6.0 mL) at room temperature. Then, the reaction mixture was stirred at 60 °C and the progress of the reaction was monitored by TLC. The reaction typically took 12 h. Upon completion, the mixture was concentrated and the residue was purified by chromatography on silica gel (eluent: hexanes/ethyl acetate) to afford the desired  $\beta$ -keto enamide **3**.

### (*Z*)-2-(ethylthio)-*N*-(4-oxopent-2-en-2-yl)-2-phenylacetamide (**3a**)

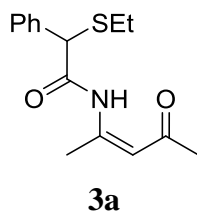

Compound **3a** was prepared in 72% yield (59.8 mg) according to the general procedure (Table 2, entry 1). Pale yellow oil. <sup>1</sup>H NMR (400 MHz, CDCl<sub>3</sub>)  $\delta$  12.84 (s, 1H), 7.50 (d, *J* = 7.4 Hz, 2H), 7.41 – 7.26 (m, 3H), 5.36 (s, 1H), 4.62 (s, 1H), 2.57 (q, *J* = 7.3 Hz, 2H), 2.34 (s, 3H), 2.13 (s, 3H), 1.27 (t, *J* = 7.0 Hz, 3H); <sup>13</sup>C NMR (100 MHz, CDCl<sub>3</sub>)  $\delta$  199.5, 170.3, 154.5, 136.0, 128.8, 128.3, 128.2, 106.5, 56.1, 30.4, 26.2, 21.7, 14.1; IR (neat): 3352 (br), 1719 (s), 1679 (s), 1558, 1457, 1242, 1198, 1067, 706, 675; HRESIMS Calcd for [C<sub>15</sub>H<sub>19</sub>NNaO<sub>2</sub>S]<sup>+</sup> (*M* + Na<sup>+</sup>) 300.1029, found 300.1034.

### (*Z*)-2-(ethylthio)-*N*-(3-oxo-1-phenylhept-1-en-1-yl)-2-phenylacetamide (**3b**)

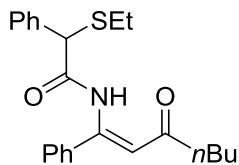

**3b**

Compound **3b** was prepared in 65% yield (73.6 mg) according to the general procedure (Table 2, entry 2). Pale yellow oil.  $^1\text{H}$  NMR (400 MHz,  $\text{CDCl}_3$ )  $\delta$  12.34 (s, 1H), 7.52 (d,  $J$  = 7.3 Hz, 2H), 7.40 – 7.27 (m, 6H), 7.24 (d,  $J$  = 6.8 Hz, 2H), 5.64 (s, 1H), 4.62 (s, 1H), 2.61 (q,  $J$  = 7.4 Hz, 2H), 2.47 (t,  $J$  = 7.5 Hz, 2H), 1.67 – 1.59 (m, 2H), 1.41 – 1.31 (m, 2H), 1.28 (t,  $J$  = 7.4 Hz, 3H), 0.92 (t,  $J$  = 7.3 Hz, 3H);  $^{13}\text{C}$  NMR (100 MHz,  $\text{CDCl}_3$ )  $\delta$  202.6, 169.3, 153.1, 136.1, 135.7, 129.5, 128.8, 128.3, 128.2, 128.0, 127.0, 109.3, 55.6, 43.7, 26.8, 26.4, 22.4, 14.1, 13.8; IR (neat): 3355 (br), 2947, 2896, 1719 (s), 1680 (s), 1557, 1439, 1274, 1185, 1089, 704; HRESIMS Calcd for  $[\text{C}_{23}\text{H}_{27}\text{NNaO}_2\text{S}]^+$  ( $\text{M} + \text{Na}^+$ ) 404.1655, found 404.1658.

**(Z)-2-(ethylthio)-N-(1-(4-fluorophenyl)-3-oxohept-1-en-1-yl)-2-phenylacetamide (3c).**

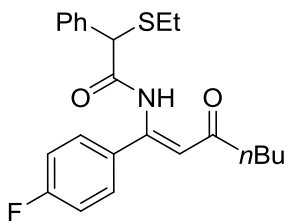

**3c**

Compound **3c** was prepared in 64% yield (74.0 mg) according to the general procedure (Table 2, entry 3). Pale yellow oil.  $^1\text{H}$  NMR (400 MHz,  $\text{CDCl}_3$ )  $\delta$  12.34 (s, 1H), 7.51 (d,  $J$  = 7.3 Hz, 2H), 7.41 – 7.28 (m, 3H), 7.25 – 7.17 (m, 2H), 7.04 – 6.93 (m, 2H), 5.61 (s, 1H), 4.62 (s, 1H), 2.61 (q,  $J$  = 7.4 Hz, 2H), 2.48 (t,  $J$  = 7.5 Hz, 2H), 1.67 – 1.59 (m, 2H), 1.39 – 1.32 (m, 2H), 1.28 (t,  $J$  = 7.4 Hz, 3H), 0.92 (t,  $J$  = 7.3 Hz, 3H);  $^{13}\text{C}$  NMR (100 MHz,  $\text{CDCl}_3$ )  $\delta$  202.5, 169.5, 163.5 (d,  $J$  = 249.0 Hz), 152.0, 136.1, 131.6 (d,  $J$  = 4.0 Hz), 129.0 (d,  $J$  = 9.0 Hz), 128.9, 128.3, 128.2, 115.1 (d,  $J$  = 22.0 Hz), 109.2, 55.6, 43.7, 26.8, 26.4, 22.4, 14.1, 13.8; IR (neat): 3378 (br), 2963, 2945, 1717 (s), 1683 (s), 1587, 1462,

1255, 1199, 1132, 1078, 751; HRESIMS Calcd for  $[C_{23}H_{26}FNNaO_2S]^+$  ( $M + Na^+$ ) 422.1560, found 422.1558.

**(Z)-N-(1-(4-chlorophenyl)-3-oxohept-1-en-1-yl)-2-(ethylthio)-2-phenylacetamide (3d)**

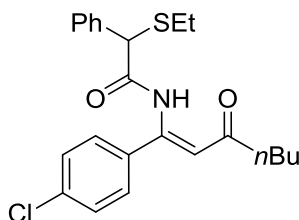

**3d**

Compound **3d** was prepared in 62% yield (76.9 mg) according to the general procedure (Table 2, entry 4). Pale yellow oil.  $^1H$  NMR (400 MHz,  $CDCl_3$ )  $\delta$  12.31 (s, 1H), 7.51 (d,  $J = 7.5$  Hz, 2H), 7.41 – 7.31 (m, 3H), 7.28 – 7.25 (m, 2H), 7.16 (d,  $J = 8.4$  Hz, 2H), 5.62 (s, 1H), 4.61 (s, 1H), 2.60 (q,  $J = 7.4$  Hz, 2H), 2.48 (t,  $J = 7.5$  Hz, 2H), 1.67 – 1.58 (m, 2H), 1.40 – 1.31 (m, 2H), 1.28 (t,  $J = 7.4$  Hz, 3H), 0.92 (t,  $J = 7.3$  Hz, 3H);  $^{13}C$  NMR (100 MHz,  $CDCl_3$ )  $\delta$  202.6, 169.5, 151.7, 136.0, 135.6, 134.1, 128.9, 128.2(8), 128.2(6), 128.2(3), 128.2(2), 109.4, 55.5, 43.7, 26.7, 26.4, 22.3, 14.1, 13.8; IR (neat): 3368 (br), 2952, 2929, 1716 (s), 1684 (s), 1558, 1457, 1281, 1136, 1068, 698, 669; HRESIMS Calcd for  $[C_{23}H_{26}ClNNaO_2S]^+$  ( $M + Na^+$ ) 438.1265, found 438.1261.

**(Z)-N-(1-(4-bromophenyl)-3-oxohept-1-en-1-yl)-2-(ethylthio)-2-phenylacetamide (3e)**

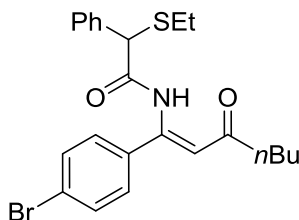

**3e**

Compound **3e** was prepared in 63% yield (72.5 mg) according to the general procedure (Table 2, entry 5). Pale yellow oil.  $^1H$  NMR (400 MHz,  $CDCl_3$ )  $\delta$  12.32 (s, 1H), 7.56 – 7.48 (m, 2H), 7.47 – 7.41 (m, 2H), 7.40 – 7.30 (m, 3H), 7.13 – 7.06 (m, 2H), 5.62 (s, 1H),

4.61 (s, 1H), 2.61 (q,  $J = 7.4$  Hz, 2H), 2.52 – 2.44 (m, 2H), 1.67 – 1.58 (m, 2H), 1.39 – 1.33 (m, 2H), 1.28 (t,  $J = 7.4$  Hz, 3H), 0.92 (t,  $J = 7.3$  Hz, 3H);  $^{13}\text{C}$  NMR (100 MHz,  $\text{CDCl}_3$ )  $\delta$  202.6, 169.5, 151.8, 136.0, 134.6, 131.2, 128.9, 128.5, 128.3, 128.2, 123.9, 109.4, 55.5, 43.7, 26.8, 26.4, 22.4, 14.1, 13.8; IR (neat): 3325 (br), 2963, 2901, 1718 (s), 1679 (s), 1554, 1448, 1268, 1068, 715, 658; HRESIMS Calcd for  $[\text{C}_{23}\text{H}_{26}\text{BrNNaO}_2\text{S}]^+$  ( $\text{M} + \text{Na}^+$ ) 482.0760, found 482.0758.

**(Z)-2-(ethylthio)-N-(3-oxo-1-(*p*-tolyl)hept-1-en-1-yl)-2-phenylacetamide (3f)**

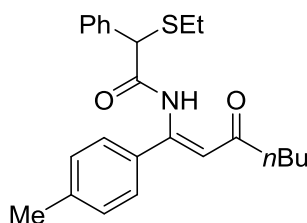

**3f**

Compound **3f** was prepared in 71% yield (83.0 mg) according to the general procedure (Table 2, entry 6). Pale yellow oil.  $^1\text{H}$  NMR (400 MHz,  $\text{CDCl}_3$ )  $\delta$  12.34 (s, 1H), 7.56 – 7.50 (m, 2H), 7.40 – 7.33 (m, 2H), 7.33 – 7.27 (m, 1H), 7.17 – 7.07 (m, 4H), 5.64 (s, 1H), 4.62 (s, 1H), 2.61 (q,  $J = 7.4$  Hz, 2H), 2.50 – 2.42 (m, 2H), 2.33 (s, 3H), 1.67 – 1.58 (m, 2H), 1.40 – 1.31 (m, 2H), 1.28 (t,  $J = 7.4$  Hz, 3H), 0.92 (t,  $J = 7.3$  Hz, 3H);  $^{13}\text{C}$  NMR (100 MHz,  $\text{CDCl}_3$ )  $\delta$  202.5, 169.4, 153.2, 139.8, 136.2, 132.7, 128.8, 128.7, 128.3, 128.1, 126.9, 108.9, 55.6, 43.6, 26.9, 26.3, 22.3, 21.3, 14.0, 13.8; IR (neat): 3323 (br), 2988, 2899, 1716 (s), 1684 (s), 1578, 1412, 1285, 1113, 1011, 701, 656; HRESIMS Calcd for  $[\text{C}_{24}\text{H}_{29}\text{NNaO}_2\text{S}]^+$  ( $\text{M} + \text{Na}^+$ ) 418.1811, found 418.1812.

**(Z)-2-(ethylthio)-N-(1-(4-methoxyphenyl)-3-oxohept-1-en-1-yl)-2-phenylacetamide (3g)**

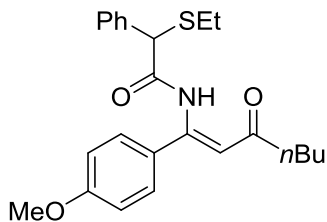

**3g**

Compound **3g** was prepared in 61% yield (75.0 mg) according to the general procedure (Table 2, entry 7). Pale yellow oil.  $^1\text{H}$  NMR (400 MHz,  $\text{CDCl}_3$ )  $\delta$  12.33 (s, 1H), 7.56 – 7.49 (m, 2H), 7.40 – 7.34 (m, 2H), 7.34 – 7.28 (m, 1H), 7.23 – 7.17 (m, 2H), 6.86 – 6.77 (m, 2H), 5.64 (s, 1H), 4.63 (s, 1H), 3.79 (s, 3H), 2.61 (q,  $J = 7.4$  Hz, 2H), 2.47 (t,  $J = 7.2$  Hz, 2H), 1.66 – 1.58 (m, 2H), 1.41 – 1.32 (m, 2H), 1.28 (t,  $J = 7.4$  Hz, 3H), 0.92 (t,  $J = 7.3$  Hz, 3H);  $^{13}\text{C}$  NMR (100 MHz,  $\text{CDCl}_3$ )  $\delta$  202.5, 169.5, 160.9, 152.9, 136.2, 128.8, 128.6, 128.3, 128.1, 127.6, 113.5, 108.5, 55.7, 55.2, 43.6, 26.9, 26.4, 22.4, 14.1, 13.8; IR (neat): 3318 (br), 2968, 2924, 1717 (s), 1682 (s), 1589, 1487, 1221, 1165, 1078, 768, 699; HRESIMS Calcd for  $[\text{C}_{24}\text{H}_{29}\text{NNaO}_3\text{S}]^+$  ( $\text{M} + \text{Na}^+$ ) 434.1760, found 434.1766.

**(Z)-N-(1-(3-chlorophenyl)-3-oxohept-1-en-1-yl)-2-(ethylthio)-2-phenylacetamide (3h)**

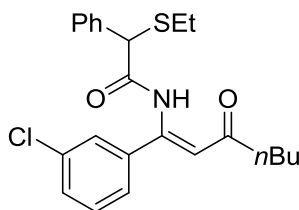

**3h**

Compound **3h** was prepared in 66% yield (82.2 mg) according to the general procedure (Table 2, entry 8). Pale yellow oil.  $^1\text{H}$  NMR (400 MHz,  $\text{CDCl}_3$ )  $\delta$  12.27 (s, 1H), 7.51 (d,  $J = 6.8$  Hz, 2H), 7.41 – 7.31 (m, 4H), 7.26 – 7.21 (m, 2H), 7.10 (d,  $J = 7.6$  Hz, 1H), 5.63 (s, 1H), 4.62 (s, 1H), 2.62 (q,  $J = 7.6$  Hz, 2H), 2.49 (t,  $J = 7.2$  Hz, 2H), 1.63 – 1.35 (m, 2H), 1.35 – 1.30 (m, 2H), 1.29 (t,  $J = 7.4$  Hz, 3H), 0.93 (t,  $J = 7.6$  Hz, 3H);  $^{13}\text{C}$  NMR (100 MHz,  $\text{CDCl}_3$ )  $\delta$  202.6, 169.5, 151.3, 137.6, 136.0, 134.0, 129.5, 129.2, 128.9, 128.3, 128.2, 127.0, 125.2, 109.7, 55.5, 43.8, 26.8, 26.4, 22.4, 14.1, 13.8; IR (neat): 3333 (br), 2971, 2861, 1723 (s), 1660 (s), 1547, 1470, 1298, 1153, 1099, 782; HRESIMS Calcd for  $[\text{C}_{23}\text{H}_{26}\text{ClNNaO}_2\text{S}]^+$  ( $\text{M} + \text{Na}^+$ ) 438.1265, found 438.1261.

**(Z)-2-(ethylthio)-N-(3-oxo-1-(*m*-tolyl)hept-1-en-1-yl)-2-phenylacetamide (3i)**

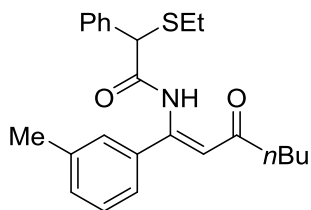

**3i**

Compound **3i** was prepared in 69% yield (81.8 mg) according to the general procedure (Table 2, entry 9). Pale yellow oil.  $^1\text{H}$  NMR (500 MHz,  $\text{CDCl}_3$ )  $\delta$  12.29 (s, 1H), 7.53 (d,  $J = 8.0$  Hz, 2H), 7.39 – 7.30 (m, 3H), 7.18 – 7.15 (m, 2H), 7.05 – 7.01 (m, 2H), 5.65 (s, 1H), 4.63 (s, 1H), 2.62 (q,  $J = 7.5$  Hz, 2H), 2.47 (t,  $J = 7.5$  Hz, 2H), 2.29 (s, 3H), 1.66 – 1.59 (m, 2H), 1.38 – 1.32 (m, 2H), 1.29 (t,  $J = 7.4$  Hz, 1H), 0.92 (t,  $J = 7.5$  Hz, 3H);  $^{13}\text{C}$  NMR (125 MHz,  $\text{CDCl}_3$ )  $\delta$  202.7, 169.4, 153.2, 137.7, 136.2, 135.6, 130.4, 128.8, 128.3, 128.2, 127.9, 127.5, 124.2, 109.2, 55.6, 43.7, 26.9, 26.4, 22.4, 21.3, 14.1, 13.8; IR (neat): 3315 (br), 2985, 2944, 1714 (s), 1659 (s), 1587, 1494, 1392, 1102, 993, 778; HRESIMS Calcd for  $[\text{C}_{24}\text{H}_{29}\text{NNaO}_2\text{S}]^+$  ( $\text{M} + \text{Na}^+$ ) 418.1811, found 418.1807.

**(Z)-2-(ethylthio)-N-(4-oxo-4-phenylbut-2-en-2-yl)-2-phenylacetamide (3j)**

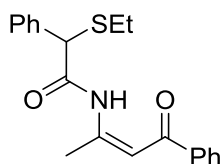

**3j**

Compound **3j** was prepared in 62% yield (61.9 mg) according to the general procedure (Table 2, entry 10). Pale yellow oil.  $^1\text{H}$  NMR (400 MHz,  $\text{CDCl}_3$ )  $\delta$  13.33 (s, 1H), 7.95 – 7.86 (m, 2H), 7.59 – 7.49 (m, 3H), 7.48 – 7.41 (m, 2H), 7.40 – 7.34 (m, 2H), 7.33 – 7.27 (m, 1H), 6.08 (s, 1H), 4.69 (s, 1H), 2.61 (q,  $J = 7.4$  Hz, 2H), 2.49 (s, 3H), 1.29 (t,  $J = 7.4$  Hz, 3H);  $^{13}\text{C}$  NMR (100 MHz,  $\text{CDCl}_3$ )  $\delta$  191.3, 170.4, 156.6, 138.5, 136.1, 132.4, 128.9, 128.5, 128.3, 128.2, 127.7, 102.9, 56.1, 26.3, 22.5, 14.1; IR (neat): 3335 (br), 1716 (s),

1684 (s), 1540, 1521, 1457, 1396, 1268, 1065, 766, 699; HRESIMS Calcd for  $[\text{C}_{20}\text{H}_{21}\text{NNaO}_2\text{S}]^+$  ( $\text{M} + \text{Na}^+$ ) 362.1185, found 362.1181.

**(Z)-2-(4-fluorophenyl)-2-(ethylthio)-N-(4-oxopent-2-en-2-yl)acetamide (3k)**

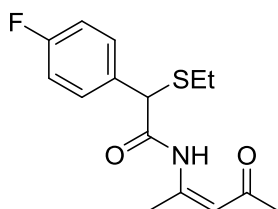

**3k**

Compound **3k** was prepared in 76% yield (67.3 mg) according to the general procedure (Table 2, entry 11). Pale yellow oil.  $^1\text{H}$  NMR (400 MHz,  $\text{CDCl}_3$ )  $\delta$  12.87 (s, 1H), 7.56 – 7.42 (m, 2H), 7.11 – 6.99 (m, 2H), 5.38 (s, 1H), 4.61 (s, 1H), 2.57 (q,  $J = 7.4$  Hz, 2H), 2.35 (s, 3H), 2.15 (s, 3H), 1.27 (t,  $J = 7.4$  Hz, 3H);  $^{13}\text{C}$  NMR (100 MHz,  $\text{CDCl}_3$ )  $\delta$  199.6, 170.0, 162.5 (d,  $J = 246.0$  Hz), 154.5, 131.9 (d,  $J = 3.0$  Hz), 130.0 (d,  $J = 8.0$  Hz), 115.8 (d,  $J = 22.0$  Hz), 106.6, 55.2, 30.4, 26.3, 21.7, 14.0; IR (neat): 3385 (br), 1717 (s), 1684 (s), 1558, 1457, 1396, 1259, 1158, 796, 669; HRESIMS Calcd for  $[\text{C}_{15}\text{H}_{18}\text{FNNaO}_2\text{S}]^+$  ( $\text{M} + \text{Na}^+$ ) 318.0934, found 318.0933.

**(Z)-2-(4-chlorophenyl)-2-(ethylthio)-N-(4-oxopent-2-en-2-yl)acetamide (3l)**

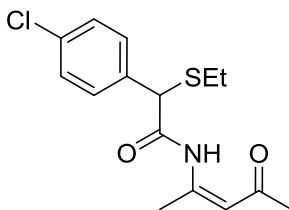

**3l**

Compound **3l** was prepared in 55% yield (51.0 mg) according to the general procedure (Table 2, entry 12). Pale yellow oil.  $^1\text{H}$  NMR (400 MHz,  $\text{CDCl}_3$ )  $\delta$  12.87 (s, 1H), 7.45 (d,  $J = 8.5$  Hz, 2H), 7.33 (d,  $J = 8.5$  Hz, 2H), 5.38 (s, 1H), 4.58 (s, 1H), 2.56 (q,  $J = 7.4$  Hz, 2H), 2.34 (s, 3H), 2.15 (s, 3H), 1.27 (t,  $J = 7.4$  Hz, 3H);  $^{13}\text{C}$  NMR (100 MHz,  $\text{CDCl}_3$ )  $\delta$  199.7, 169.8, 154.5, 134.7, 134.1, 129.6, 129.0, 106.6, 55.3, 30.4, 26.3, 21.7, 14.1; IR

(neat): 3350 (br), 1716 (s), 1684 (s), 1540, 1457, 1362, 1259, 1091, 781, 702; HRESIMS Calcd for  $[C_{18}H_{15}ClNNaO_2S]^+$  ( $M + Na^+$ ) 334.0639, found 334.0639.

**(Z)-2-(ethylthio)-N-(4-oxopent-2-en-2-yl)-2-(p-tolyl)acetamide (3m)**

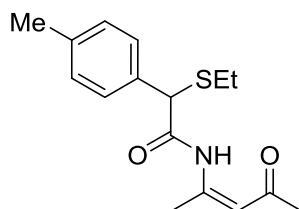

**3m**

Compound **3m** was prepared in 60% yield (52.4 mg) according to the general procedure (Table 2, entry 13). Pale yellow oil.  $^1H$  NMR (400 MHz,  $CDCl_3$ )  $\delta$  12.84 (s, 1H), 7.39 (d,  $J = 8.1$  Hz, 2H), 7.17 (d,  $J = 7.9$  Hz, 2H), 5.35 (d,  $J = 0.6$  Hz, 1H), 4.60 (s, 1H), 2.56 (q,  $J = 7.4$  Hz, 2H), 2.34 (d,  $J = 0.9$  Hz, 3H), 2.33 (s, 3H), 2.14 (s, 3H), 1.27 (t,  $J = 7.4$  Hz, 3H);  $^{13}C$  NMR (100 MHz,  $CDCl_3$ )  $\delta$  199.5, 170.5, 154.6, 138.0, 133.0, 129.5, 128.1, 106.4, 55.8, 30.4, 26.2, 21.8, 21.1, 14.1; IR (neat): 3335 (br), 1717 (s), 1698 (s), 1558, 1507, 1418, 1338, 1318, 669, 568; HRESIMS Calcd for  $[C_{16}H_{21}NNaO_2S]^+$  ( $M + Na^+$ ) 314.1185, found 314.1186.

**(Z)-2-(ethylthio)-2-(3-fluorophenyl)-N-(4-oxopent-2-en-2-yl)acetamide (3n)**

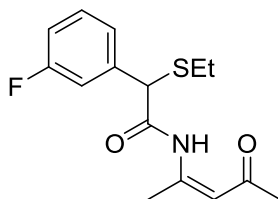

**3n**

Compound **3n** was prepared in 71% yield (62.8 mg) according to the general procedure (Table 2, entry 14). Pale yellow oil.  $^1H$  NMR (400 MHz, )  $\delta$  12.88 (s, 1H), 7.36 – 7.23 (m, 3H), 7.01 (t,  $J = 8.0$  Hz, 1H), 5.39 (s, 1H), 4.60 (s, 1H), 2.58 (q,  $J = 7.2$  Hz, 2H), 2.35 (s, 3H), 2.15 (s, 3H), 1.28 (t,  $J = 7.2$  Hz, 3H);  $^{13}C$  NMR (100 MHz, )  $\delta$  199.6, 169.6, 164.1 (d,  $J = 246.0$  Hz), 154.4, 138.6 (d,  $J = 7.0$  Hz), 130.3 (d,  $J = 8.0$  Hz), 124.1 (d,  $J = 3.0$



Hz), 115.4 (d,  $J = 22.0$  Hz), 115.3 (d,  $J = 21.0$  Hz), 106.7, 55.5, 30.4, 26.3, 21.7, 14.1; IR (neat): 3388 (br), 2930, 1713 (s), 1650 (s), 1600, 1470, 1454, 1245, 1120, 774, 683; HRESIMS Calcd for  $[C_{15}H_{18}FNNaO_2S]^+$  ( $M + Na^+$ ) 318.0934, found 318.0939.

**(Z)-2-(ethylthio)-N-(4-oxopent-2-en-2-yl)-2-(*m*-tolyl)acetamide (3o)**

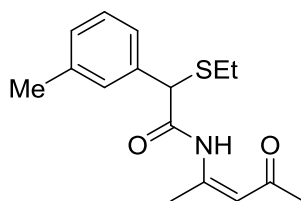

**3o**

Compound **3o** was prepared in 62% yield (54.1 mg) according to the general procedure (Table 2, entry 15). Pale yellow oil.  $^1H$  NMR (500 MHz,  $CDCl_3$ )  $\delta$  12.84 (s, 1H), 7.35 – 7.30 (m, 2H), 7.27 – 7.22 (m, 1H), 7.11 (d,  $J = 7.5$  Hz, 1H), 5.36 (s, 1H), 4.57 (s, 1H), 2.57 (q,  $J = 7.5$  Hz, 2H), 2.35 (s, 6H), 2.14 (s, 3H), 1.27 (t,  $J = 7.5$  Hz, 3H);  $^{13}C$  NMR (125 MHz,  $CDCl_3$ )  $\delta$  199.4, 170.4, 154.6, 138.6, 136.0, 129.1, 129.0, 128.8, 125.3, 106.5, 56.1, 30.4, 26.3, 21.8, 21.4, 14.1; IR (neat): 3344 (br), 2933, 1723 (s), 1657 (s), 1558, 1466, 1245, 1118, 760, 621; HRESIMS Calcd for  $[C_{16}H_{21}NNaO_2S]^+$  ( $M + Na^+$ ) 314.1185, found 314.1192.

**(Z)-2-(benzylthio)-N-(4-oxopent-2-en-2-yl)-2-phenylacetamide (3p)**

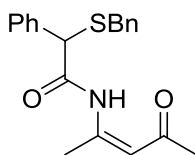

**3p**

Compound **3p** was prepared in 67% yield (67.4 mg) according to the general procedure (Table 2, entry 16). Pale yellow oil.  $^1H$  NMR (400 MHz,  $CDCl_3$ )  $\delta$  12.77 (s, 1H), 7.47 (d,  $J = 7.3$  Hz, 2H), 7.42 – 7.30 (m, 7H), 7.28 – 7.21 (m, 1H), 5.34 (s, 1H), 4.45 (s, 1H), 3.76 (dd,  $J = 34.8, 13.6$  Hz, 2H), 2.32 (s, 3H), 2.15 (s, 3H);  $^{13}C$  NMR (100 MHz,  $CDCl_3$ )  $\delta$  199.4, 169.9, 154.4, 136.9, 135.8, 129.0, 128.9, 128.5, 128.4, 128.3, 127.3, 106.5, 55.7,

36.6, 30.4, 21.7; IR (neat): 3310 (br), 1716 (s), 1688 (s), 1521, 1507, 1489, 1457, 1396, 1339, 1259, 669; HRESIMS Calcd for  $[C_{20}H_{21}NNaO_2S]^+$  ( $M + Na^+$ ) 362.1185, found 362.1190.

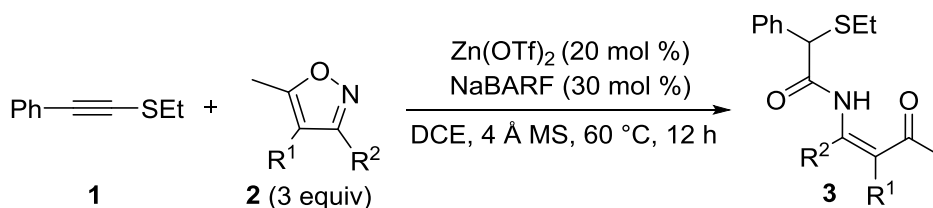

### General procedure for the synthesis of $\beta$ -keto enamides **3**:

NaBARF (0.09 mmol, 79.8 mg) and  $\text{Zn(OTf)}_2$  (0.06 mmol, 21.8 mg) was added to a mixture of the thioynol ether **1** (0.30 mmol), isoxazole **2** (0.90 mol) and the 4 Å MS (200 mg) in DCE (6.0 mL) at room temperature. Then, the reaction mixture was stirred at 60 °C and the progress of the reaction was monitored by TLC. The reaction typically took 12 h. Upon completion, the mixture was concentrated and the residue was purified by chromatography on silica gel (eluent: hexanes/ethyl acetate) to afford the desired  $\beta$ -keto enamide **3**.

### (*Z*)-2-(ethylthio)-*N*-(4-oxo-3-phenylpent-2-en-2-yl)-2-phenylacetamide (**3q**)

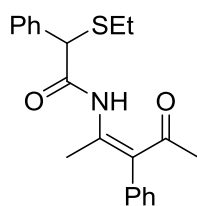

**3q**

Compound **3q** was prepared in 74% yield (78.4 mg) according to the general procedure (Table 3, entry 1). Pale yellow oil.  $^1\text{H}$  NMR (400 MHz,  $\text{CDCl}_3$ )  $\delta$  13.60 (s, 1H), 7.63 – 7.54 (m, 2H), 7.45 – 7.31 (m, 6H), 7.18 – 7.09 (m, 2H), 4.69 (s, 1H), 2.62 (q,  $J = 7.4$  Hz, 2H), 2.12 (s, 3H), 1.92 (s, 3H), 1.31 (t,  $J = 7.4$  Hz, 3H);  $^{13}\text{C}$  NMR (100 MHz,  $\text{CDCl}_3$ )  $\delta$  201.3, 170.6, 152.3, 138.1, 136.3, 130.7, 128.9, 128.8, 128.3, 128.2, 127.5, 119.9, 56.4, 31.2, 26.2, 19.4, 14.1; IR (neat): 3315 (br), 1716 (s), 1683 (s), 1540, 1507, 1489, 1457,

1338, 1212, 704, 669; HRESIMS Calcd for  $[C_{21}H_{23}NNaO_2S]^+$  ( $M + Na^+$ ) 376.1342, found 376.1349.

**(Z)-2-(ethylthio)-N-(3-(4-fluorophenyl)-4-oxopent-2-en-2-yl)-2-phenylacetamide (3r)**

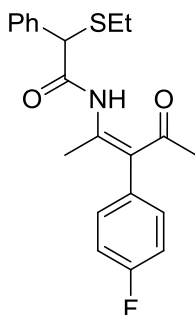

**3r**

Compound **3r** was prepared in 64% yield (71.2 mg) according to the general procedure (Table 3, entry 2). Pale yellow oil.  $^1H$  NMR (400 MHz,  $CDCl_3$ )  $\delta$  13.58 (s, 1H), 7.60 – 7.55 (m, 2H), 7.42 – 7.38 (m, 2H), 7.36 – 7.32 (m, 1H), 7.14 – 7.07 (m, 4H), 4.68 (s, 1H), 2.61 (q,  $J = 7.4$  Hz, 2H), 2.12 (s, 3H), 1.91 (s, 3H), 1.31 (t,  $J = 7.4$  Hz, 3H);  $^{13}C$  NMR (100 MHz,  $CDCl_3$ )  $\delta$  201.0, 170.6, 162.2 (d,  $J = 246.0$  Hz), 152.8, 136.3, 134.1 (d,  $J = 4.0$  Hz), 132.4 (d,  $J = 7.0$  Hz), 128.9, 128.4, 128.2, 118.8, 115.9 (d,  $J = 21.0$  Hz), 56.5, 31.1, 26.3, 19.3, 14.1; IR (neat): 3387 (br), 1719 (s), 1654 (s), 1541, 1507, 1425, 1328, 1203, 1115, 732, 688; HRESIMS Calcd for  $[C_{21}H_{22}FNNaO_2S]^+$  ( $M + Na^+$ ) 394.1247, found 394.1248.

**(Z)-N-(3-(4-chlorophenyl)-4-oxopent-2-en-2-yl)-2-(ethylthio)-2-phenylacetamide (3s)**

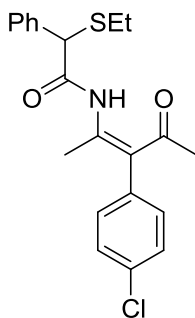

**3s**

Compound **3s** was prepared in 61% yield (70.8 mg) according to the general procedure (Table 3, entry 3). Pale yellow oil.  $^1\text{H}$  NMR (400 MHz,  $\text{CDCl}_3$ )  $\delta$  13.55 (s, 1H), 7.55 (d,  $J = 7.2$  Hz, 2H), 7.41 – 7.30 (m, 5H), 7.08 (d,  $J = 8.4$  Hz, 2H), 4.66 (s, 1H), 2.60 (q,  $J = 7.4$  Hz, 2H), 2.11 (s, 3H), 1.90 (s, 3H), 1.29 (t,  $J = 7.4$  Hz, 3H);  $^{13}\text{C}$  NMR (100 MHz,  $\text{CDCl}_3$ )  $\delta$  200.7, 170.6, 152.8, 136.7, 136.3, 133.8, 132.2, 129.2, 128.9, 128.4, 128.2, 118.7, 56.5, 31.2, 26.3, 19.4, 14.1; IR (neat): 3342 (br), 1721 (s), 1658 (s), 1538, 1329, 1207, 1113, 937, 734, 716, 691; HRESIMS Calcd for  $[\text{C}_{21}\text{H}_{22}\text{ClNNaO}_2\text{S}]^+$  ( $\text{M} + \text{Na}^+$ ) 410.0952, found 410.0955.

**(Z)-N-(3-(4-bromophenyl)-4-oxopent-2-en-2-yl)-2-(ethylthio)-2-phenylacetamide (3t)**

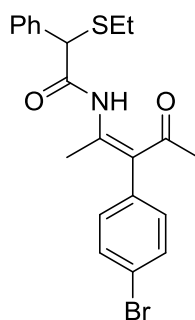

**3t**

Compound **3t** was prepared in 58% yield (75.0 mg) according to the general procedure (Table 3, entry 4). Pale yellow oil.  $^1\text{H}$  NMR (400 MHz,  $\text{CDCl}_3$ )  $\delta$  13.56 (s, 1H), 7.56 – 7.52 (m, 4H), 7.41 – 7.37 (m, 2H), 7.34 – 7.31 (m, 1H), 7.02 (d,  $J = 8.4$  Hz, 2H), 4.66 (s, 1H), 2.60 (q,  $J = 7.4$  Hz, 2H), 2.11 (s, 3H), 1.90 (s, 3H), 1.29 (t,  $J = 7.4$  Hz, 3H);  $^{13}\text{C}$  NMR (100 MHz,  $\text{CDCl}_3$ )  $\delta$  200.6, 170.6, 152.8, 137.2, 136.2, 132.5, 132.2, 128.9, 128.4, 128.2, 121.9, 118.7, 56.5, 31.2, 26.3, 19.4, 14.1; IR (neat): 3358 (br), 1721 (s), 1650 (s), 1552, 1427, 1330, 1230, 1207, 1115, 687, 543; HRESIMS Calcd for  $[\text{C}_{21}\text{H}_{22}\text{BrNNaO}_2\text{S}]^+$  ( $\text{M} + \text{Na}^+$ ) 454.0447, found 454.0449.

**(Z)-2-(ethylthio)-N-(4-oxo-3-(p-tolyl)pent-2-en-2-yl)-2-phenylacetamide (3u)**

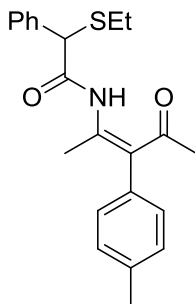

**3u**

Compound **3u** was prepared in 66% yield (72.7 mg) according to the general procedure (Table 3, entry 5). Pale yellow oil.  $^1\text{H}$  NMR (400 MHz,  $\text{CDCl}_3$ )  $\delta$  13.56 (s, 1H), 7.56 (d,  $J = 7.1$  Hz, 2H), 7.41 – 7.37 (m, 2H), 7.34 – 7.30 (m, 1H), 7.19 (d,  $J = 7.8$  Hz, 2H), 7.01 (d,  $J = 8.0$  Hz, 2H), 4.67 (s, 1H), 2.60 (q,  $J = 7.4$  Hz, 2H), 2.37 (s, 3H), 2.11 (s, 3H), 1.91 (s, 3H), 1.30 (t,  $J = 7.4$  Hz, 3H);  $^{13}\text{C}$  NMR (100 MHz,  $\text{CDCl}_3$ )  $\delta$  201.6, 170.5, 152.2, 137.3, 136.4, 135.1, 130.6, 129.6, 128.8, 128.4, 128.2, 119.8, 56.5, 31.2, 26.3, 21.1, 19.3, 14.1; IR (neat): 3330 (br), 1714 (s), 1681 (s), 1585, 1538, 1442, 1246, 1201, 1116, 817, 690; HRESIMS Calcd for  $[\text{C}_{22}\text{H}_{25}\text{NNaO}_2\text{S}]^+$  ( $\text{M} + \text{Na}^+$ ) 390.1498, found 390.1497.

**(Z)-N-(3-(3-chlorophenyl)-4-oxopent-2-en-2-yl)-2-(ethylthio)-2-phenylacetamide (3v)**

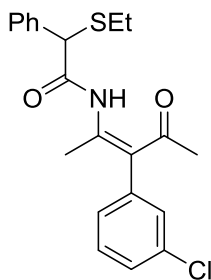

**3v**

Compound **3v** was prepared in 68% yield (78.9 mg) according to the general procedure (Table 3, entry 6). Pale yellow oil.  $^1\text{H}$  NMR (400 MHz,  $\text{CDCl}_3$ )  $\delta$  13.57 (s, 1H), 7.57 – 7.54 (m, 2H), 7.42 – 7.37 (m, 2H), 7.36 – 7.31 (m, 3H), 7.17 – 7.16 (m, 1H), 7.07 – 7.02 (m, 1H), 4.67 (s, 1H), 2.60 (q,  $J = 7.2$  Hz, 2H), 2.12 (s, 3H), 1.91 (s, 3H), 1.30 (t,  $J = 7.6$  Hz, 3H);  $^{13}\text{C}$  NMR (100 MHz,  $\text{CDCl}_3$ )  $\delta$  200.5, 170.7, 153.0, 140.1, 136.2, 134.7, 130.8, 130.2, 129.1, 128.9, 128.3, 128.2, 127.9, 118.6, 56.5, 31.1, 26.3, 19.4, 14.1; IR (neat):

3358 (br), 1728 (s), 1682 (s), 1557, 1539, 1394, 1206, 1113, 783, 689; HRESIMS Calcd for  $[\text{C}_{21}\text{H}_{22}\text{ClNNaO}_2\text{S}]^+$  ( $\text{M} + \text{Na}^+$ ) 410.0952, found 410.0943

**(Z)-2-(ethylthio)-N-(4-oxo-3-(*m*-tolyl)pent-2-en-2-yl)-2-phenylacetamide (3w)**

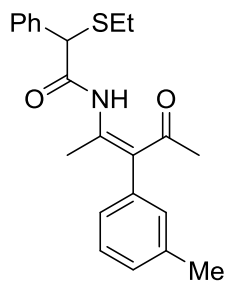

**3w**

Compound **3w** was prepared in 70% yield (77.0 mg) according to the general procedure (Table 3, entry 7). Pale yellow oil.  $^1\text{H}$  NMR (400 MHz,  $\text{CDCl}_3$ )  $\delta$  13.56 (s, 1H), 7.56 (d,  $J = 7.2$  Hz, 2H), 7.41 – 7.37 (m, 2H), 7.35 – 7.30 (m, 1H), 7.29 – 7.24 (m, 1H), 7.14 (d,  $J = 7.6$  Hz, 1H), 6.95 – 6.91 (m, 2H), 4.67 (s, 1H), 2.60 (q,  $J = 7.2$  Hz, 2H), 2.35 (s, 3H), 2.11 (s, 3H), 1.91 (s, 3H), 1.30 (t,  $J = 7.2$  Hz, 3H);  $^{13}\text{C}$  NMR (100 MHz,  $\text{CDCl}_3$ )  $\delta$  201.4, 170.6, 152.2, 138.6, 138.1, 136.4, 131.3, 128.9, 128.8, 128.4, 128.3, 128.2, 127.7, 120.1, 56.5, 31.1, 26.3, 21.3, 19.4, 14.2; IR (neat): 3378 (br), 2915, 1719 (s), 1683 (s), 1558, 1435, 1328, 1215, 1122, 680; HRESIMS Calcd for  $[\text{C}_{22}\text{H}_{25}\text{NNaO}_2\text{S}]^+$  ( $\text{M} + \text{Na}^+$ ) 390.1498, found 390.1491.

**(Z)-2-(ethylthio)-N-(3-methyl-4-oxopent-2-en-2-yl)-2-phenylacetamide (3x)**

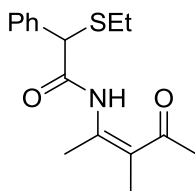

**3x**

Compound **3x** was prepared in 58% yield (51.0 mg) according to the general procedure except at 80 °C in 24 h (Table 3, entry 8). Pale yellow oil.  $^1\text{H}$  NMR (400 MHz,  $\text{CDCl}_3$ )  $\delta$  13.35 (s, 1H), 7.54 – 7.47 (m, 2H), 7.38 – 7.26 (m, 3H), 4.60 (s, 1H), 2.56 (q,  $J = 7.4$  Hz,

2H), 2.38 (s, 3H), 2.26 (s, 3H), 1.91 (s, 3H), 1.27 (t,  $J = 7.4$  Hz, 3H);  $^{13}\text{C}$  NMR (100 MHz,  $\text{CDCl}_3$ )  $\delta$  202.0, 170.1, 150.0, 136.5, 128.7, 128.2, 128.0, 111.6, 56.4, 30.0, 26.2, 17.3, 14.6, 14.1; IR (neat): 3315 (br), 1717 (s), 1684 (s), 1558, 1473, 1419, 1396, 1339, 1236, 750, 669; HRESIMS Calcd for  $[\text{C}_{16}\text{H}_{21}\text{NNaO}_2\text{S}]^+$  ( $\text{M} + \text{Na}^+$ ) 314.1185, found 314.1186.

**(Z)-2-(ethylthio)-N-(3-oxo-1,2-diphenylbut-1-en-1-yl)-2-phenylacetamide (3y)**

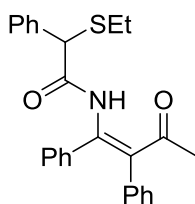

**3y**

Compound **3y** was prepared in 72% yield (89.6 mg) according to the general procedure (Table 3, entry 9). Pale yellow oil.  $^1\text{H}$  NMR (400 MHz,  $\text{CDCl}_3$ )  $\delta$  12.92 (s, 1H), 7.54 – 7.51 (m, 2H), 7.41 – 7.31 (m, 3H), 7.14 – 7.01 (m, 6H), 6.98 – 6.94 (m, 2H), 6.91 – 6.86 (m, 2H), 4.62 (s, 1H), 2.63 (q,  $J = 7.6$  Hz, 2H), 2.02 (s, 3H), 1.30 (t,  $J = 7.2$  Hz, 3H);  $^{13}\text{C}$  NMR (100 MHz,  $\text{CDCl}_3$ )  $\delta$  202.4, 169.2, 150.2, 137.0, 136.2, 134.9, 131.5, 128.8, 128.3, 128.2, 128.0, 127.8, 127.3, 126.9, 121.7, 55.9, 31.3, 26.3, 14.1; IR (neat): 3318 (br), 1725 (s), 1669 (s), 1558, 1502, 1412, 1305, 1247, 1178, 1008, 689; HRESIMS Calcd for  $[\text{C}_{26}\text{H}_{25}\text{NNaO}_2\text{S}]^+$  ( $\text{M} + \text{Na}^+$ ) 438.1498, found 438.1493.

**2-(ethylthio)-N-(2-formylphenyl)-2-phenylacetamide (3z)**

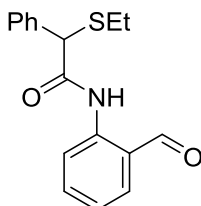

**3z**

Compound **3z** was prepared in 81% yield (72.7 mg) according to the general procedure except in the absent of 4 Å MS. Pale yellow oil.  $^1\text{H}$  NMR (400 MHz,  $\text{CDCl}_3$ )  $\delta$  11.86 (s,

1H), 9.91 (s, 1H), 8.73 (d,  $J = 8.4$  Hz, 1H), 7.70 – 7.63 (m, 1H), 7.63 – 7.50 (m, 3H), 7.40 – 7.28 (m, 3H), 7.27 – 7.19 (m, 1H), 4.75 (s, 1H), 2.72 – 2.55 (m, 2H), 1.30 (t,  $J = 7.4$  Hz, 3H);  $^{13}\text{C}$  NMR (100 MHz,  $\text{CDCl}_3$ )  $\delta$  195.2, 170.1, 140.3, 136.4, 136.0, 135.9, 128.9, 128.2(0), 128.1(6), 123.3, 122.1, 119.9, 56.1, 26.5, 14.1.; IR (neat): 3377 (br), 1708 (s), 1658 (s), 1578, 1457, 1354, 1242, 1178, 1058, 747, 657; HRESIMS Calcd for  $[\text{C}_{17}\text{H}_{17}\text{NNaO}_2\text{S}]^+$  ( $\text{M} + \text{Na}^+$ ) 322.0872, found 322.0870.

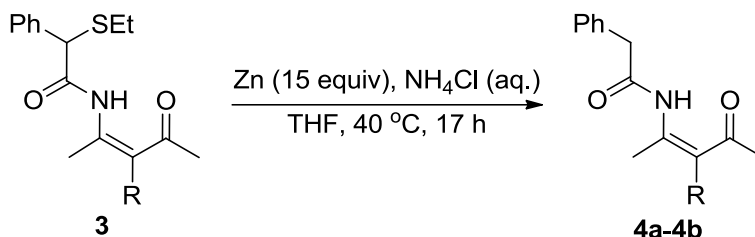

#### General procedure for the synthesis of $\beta$ -keto enamides **4a–4b**:

Zinc powder (3 mmol, 195 mg) was added to a solution of the compound **3** (0.2 mmol) in the mixture of saturated  $\text{NH}_4\text{Cl}$  (aq.) and THF (3 mL, v/v = 1:1) at room temperature. The reaction mixture was stirred at 40 °C and the progress of the reaction was monitored by TLC. The reaction typically took 17 h. Upon completion, the mixture was then concentrated and the residue was purified by chromatography on silica gel (eluent: petroleum ether/ethyl acetate) to afford the desired  $\beta$ -keto enamide **4a** or **4b**.

#### (*Z*)-*N*-(4-oxopent-2-en-2-yl)-2-phenylacetamide (**4a**)

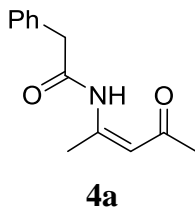

Compound **4a** was prepared in 72% yield (31.0 mg) according to the general procedure. Yellow oil.  $^1\text{H}$  NMR (400 MHz,  $\text{CDCl}_3$ )  $\delta$  12.35 (s, 1H), 7.42 – 7.27 (m, 5H), 5.30 (s, 1H), 3.66 (s, 2H), 2.35 (s, 3H), 2.10 (s, 3H);  $^{13}\text{C}$  NMR (100 MHz,  $\text{CDCl}_3$ )  $\delta$  199.5, 170.7, 155.0, 133.7, 129.4, 128.8, 127.4, 105.8, 45.6, 30.4, 21.8; IR (neat): 3325 (br), 1716 (s),



1684 (s), 1540, 1457, 1419, 1362, 1260, 1120, 721; HRESIMS Calcd for  $[C_{13}H_{15}NNaO_2]^+$  ( $M + Na^+$ ) 240.0995, found 240.0999.

**(Z)-N-(3-methyl-4-oxopent-2-en-2-yl)-2-phenylacetamide (4b)**

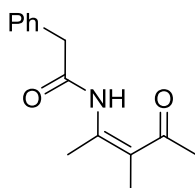

**4b**

Compound **4b** was prepared in 77% yield (35.2 mg) according to the general procedure. Yellow oil.  $^1H$  NMR (400 MHz,  $CDCl_3$ )  $\delta$  12.93 (s, 1H), 7.39 – 7.31 (m, 4H), 7.31 – 7.24 (m, 1H), 3.63 (s, 2H), 2.38 (d,  $J = 0.5$  Hz, 3H), 2.22 (s, 3H), 1.89 (d,  $J = 0.6$  Hz, 3H);  $^{13}C$  NMR (100 MHz,  $CDCl_3$ )  $\delta$  202.1, 170.6, 150.7, 134.2, 129.3, 128.7, 127.1, 110.7, 45.9, 30.1, 17.3, 14.5; IR (neat): 3333 (br), 1717 (s), 1684 (s), 1559, 1475, 1396, 1339, 1173, 750, 705; HRESIMS Calcd for  $[C_{14}H_{17}NNaO_2]^+$  ( $M + Na^+$ ) 254.1151, found 254.1153.

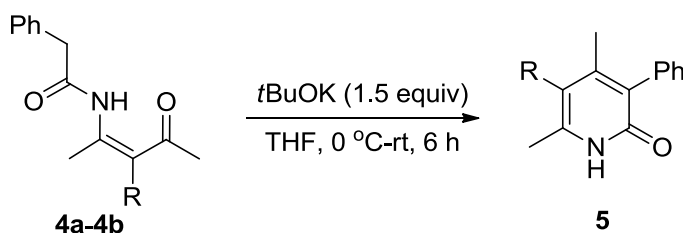

**General procedure for the synthesis of 2-pyridones 5a-5b:**

*t*BuOK (0.3 mmol, 33.6 mg) was added to a solution of the compound **4a** or **4b** (0.2 mmol) in THF (2.0 mL) at 0 °C. The reaction mixture was then allowed warm to room temperature and the progress of the reaction was monitored by TLC. The reaction typically took 6 h. Upon completion, the mixture was then concentrated and the residue was purified by chromatography on silica gel (eluent: dichloromethane/methanol) to afford the desired product 2-pyridone **5**.

**4,6-dimethyl-3-phenylpyridin-2(1H)-one (5a)**

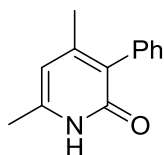

**5a**

Compound **5a** was prepared in 64% yield (25.4 mg) according to the general procedure. Yellow oil.  $^1\text{H}$  NMR (400 MHz,  $\text{CDCl}_3$ )  $\delta$  12.70 (s, 1H), 7.43 – 7.35 (m, 2H), 7.34 – 7.23 (m, 3H), 5.97 (s, 1H), 2.21 (s, 3H), 2.02 (s, 3H);  $^{13}\text{C}$  NMR (100 MHz,  $\text{CDCl}_3$ )  $\delta$  164.3, 149.4, 143.0, 135.9, 130.3, 128.0, 127.2, 126.9, 109.0, 20.6, 18.7; IR (neat): 3265 (br), 1670 (s), 1578, 1507, 1436, 1338, 1318, 757, 704; HRESIMS Calcd for  $[\text{C}_{13}\text{H}_{13}\text{NNaO}]^+$  ( $\text{M} + \text{Na}^+$ ) 222.0889, found 222.0888.

#### 4,5,6-trimethyl-3-phenylpyridin-2(1H)-one (**5b**)

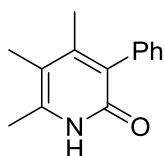

**5b**

Compound **5b** was prepared in 77% yield (32.6 mg) according to the general procedure. Pale Yellow oil.  $^1\text{H}$  NMR (400 MHz,  $\text{DMSO-d}_6$ )  $\delta$  11.42 (s, 1H), 7.42 – 7.34 (m, 2H), 7.33 – 7.25 (m, 1H), 7.14 (d,  $J = 7.0$  Hz, 2H), 2.20 (s, 3H), 1.95 (s, 3H), 1.91 (s, 3H);  $^{13}\text{C}$  NMR (100 MHz,  $\text{DMSO-d}_6$ )  $\delta$  161.4, 148.5, 139.8, 137.8, 130.9, 128.2, 128.1, 127.0, 111.4, 18.6, 17.2, 13.7; IR (neat): 3265 (br), 1653 (s), 1540, 1507, 1473, 1396, 1260, 751, 669; HRESIMS Calcd for  $[\text{C}_{14}\text{H}_{15}\text{NNaO}]^+$  ( $\text{M} + \text{Na}^+$ ) 236.1046, found 236.1050.

#### 1-(2-benzyl-4-methyloxazol-5-yl)ethan-1-one (**5c**)

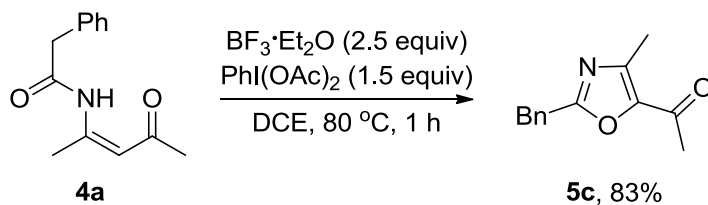

Compound **5c** was prepared according to the known procedures.<sup>6</sup> Pale Yellow oil (62.4 mg, 83% yield). <sup>1</sup>H NMR (400 MHz, CDCl<sub>3</sub>) δ 7.40 – 7.29 (m, 4H), 7.29 – 7.24 (m, 1H), 4.12 (s, 2H), 2.47 (s, 3H), 2.42 (s, 3H); <sup>13</sup>C NMR (100 MHz, CDCl<sub>3</sub>) δ 187.4, 163.5, 145.5, 145.0, 134.3, 128.7(3), 127.6(9), 127.3, 34.7, 27.4, 13.5; IR (neat): 2975; 1720 (s), 1652, 1578, 1501, 1478, 1358, 1102, 1011, 744; HRESIMS Calcd for [C<sub>13</sub>H<sub>13</sub>NNaO<sub>2</sub>]<sup>+</sup> (M + Na<sup>+</sup>) 238.0838, found 238.0841.

### 2,6-dimethyl-3,4-diphenylpyridine (**5d**)

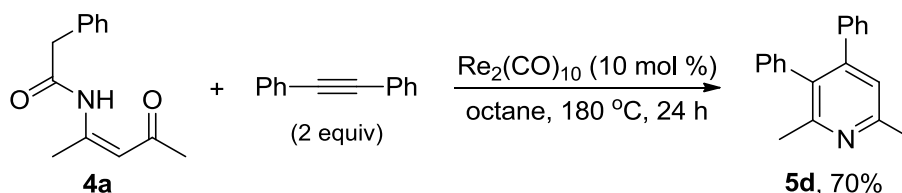

A mixture of Re<sub>2</sub>(CO)<sub>10</sub> (19.6 mg, 0.03 mmol), **4a** (0.3 mmol, 65.1 mg), diphenylacetylene (0.6 mmol, 106.9 mg), and octane (0.5 mL) was stirred at 180 °C for 24 h under a nitrogen atmosphere. After the reaction mixture was cooled to 25 °C, the mixture was then concentrated and the residue was purified by chromatography on silica gel (eluent: petroleum ether/ethyl acetate) to afford pyridine **5d** (54.7 mg, 70% yield, yellow oil). This compound is known and the spectroscopic data match those reported.<sup>7</sup> <sup>1</sup>H NMR (400 MHz, CDCl<sub>3</sub>) δ 7.25 – 7.19 (m, 3H), 7.19 – 7.13 (m, 3H), 7.09 – 7.00 (m, 5H), 2.61 (s, 3H), 2.40 (s, 3H); <sup>13</sup>C NMR (100 MHz, CDCl<sub>3</sub>) δ 156.2, 156.1, 149.2, 139.5, 138.4, 132.3, 130.3, 129.2, 128.0, 127.7, 127.2, 126.8, 121.8, 24.2, 23.9.

### 2-benzyl-4,5,6-trimethylpyrimidine (**5e**)

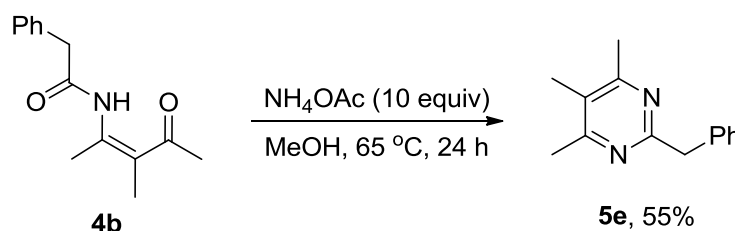

NH<sub>4</sub>OAc (231.0 mg, 3 mmol) was added to a solution of compound **4b** (0.3 mmol, 76.3 mg) in dry MeOH (3.0 mL) at room temperature. The reaction mixture was stirred at 65

°C and the progress of the reaction was monitored by TLC. Upon completion, the mixture was then concentrated and the residue was purified by chromatography on silica gel (eluent: petroleum ether/ethyl acetate) to afford pyrimidine **5e** (31.4 mg, 55% yield, yellow oil). <sup>1</sup>H NMR (400 MHz, CDCl<sub>3</sub>) δ 7.36 (d, *J* = 7.5 Hz, 2H), δ 7.30 – 7.23 (m, 2H), δ 7.22 – 7.14 (m, 1H), 4.16 (s, 2H), 2.44 (s, 6H), 2.16 (s, 3H); <sup>13</sup>C NMR (100 MHz, CDCl<sub>3</sub>) δ 165.5, 164.6, 139.0, 129.0, 128.2, 126.2, 124.2, 45.5, 22.4, 13.7; IR (neat): 2926, 1698, 1646, 1507, 1489, 1362, 1318, 993, 731, 669; HRESIMS Calcd for [C<sub>14</sub>H<sub>16</sub>N<sub>2</sub>Na]<sup>+</sup> (M + Na<sup>+</sup>) 235.1206, found 235.1203.

**Compound 3c (CCDC Number = 1819543)**

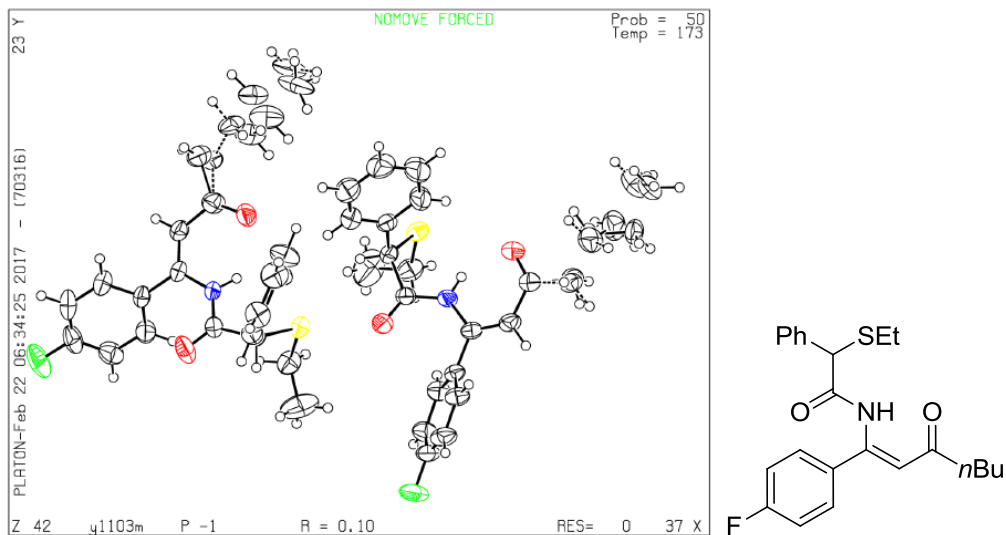

Bond precision: C-C = 0.0061 Å

Wavelength=0.71073

Cell: a=8.7586 (18) b=12.203 (3) c=19.973 (4)  
 alpha=91.534 (4) beta=96.604 (4) gamma=90.138 (4)

Temperature: 173 K

|                        | Calculated                                                                                                                                                                            | Reported                                                                                                                     |
|------------------------|---------------------------------------------------------------------------------------------------------------------------------------------------------------------------------------|------------------------------------------------------------------------------------------------------------------------------|
| Volume                 | 2119.8 (8)                                                                                                                                                                            | 2119.8 (8)                                                                                                                   |
| Space group            | P -1                                                                                                                                                                                  | P -1                                                                                                                         |
| Hall group             | -P 1                                                                                                                                                                                  | -P 1                                                                                                                         |
| Moiety formula         | C <sub>20.45</sub> H <sub>19.45</sub> F N O <sub>2</sub> S,<br>C <sub>20</sub> H <sub>19</sub> F N O <sub>2</sub> S, C <sub>2</sub> H <sub>4</sub> ,<br>1.55 (C H <sub>2</sub> ), 2 ( | 0.5 (C <sub>23</sub> H <sub>26</sub> F N O <sub>2</sub> S),<br>0.5 (C <sub>23</sub> H <sub>25.55</sub> F N O <sub>2</sub> S) |
| Sum formula            | C <sub>46</sub> H <sub>51.55</sub> F <sub>2</sub> N <sub>2</sub> O <sub>4</sub> S <sub>2</sub>                                                                                        | C <sub>23</sub> H <sub>26</sub> F N O <sub>2</sub> S                                                                         |
| Mr                     | 798.56                                                                                                                                                                                | 399.51                                                                                                                       |
| Dx, g cm <sup>-3</sup> | 1.251                                                                                                                                                                                 | 1.252                                                                                                                        |
| Z                      | 2                                                                                                                                                                                     | 4                                                                                                                            |
| Mu (mm <sup>-1</sup> ) | 0.179                                                                                                                                                                                 | 0.179                                                                                                                        |
| F <sub>000</sub>       | 847.1                                                                                                                                                                                 | 848.0                                                                                                                        |
| F <sub>000</sub> '     | 847.97                                                                                                                                                                                |                                                                                                                              |
| h, k, lmax             | 11, 15, 25                                                                                                                                                                            | 11, 15, 25                                                                                                                   |
| Nref                   | 9731                                                                                                                                                                                  | 9239                                                                                                                         |
| Tmin, Tmax             | 0.914, 0.931                                                                                                                                                                          |                                                                                                                              |
| Tmin'                  | 0.914                                                                                                                                                                                 |                                                                                                                              |

Correction method= Not given

Data completeness= 0.949

Theta (max)= 27.484

R (reflections)= 0.0960 ( 6760)

wR2 (reflections)= 0.2668 ( 9239)

S = 1.081

Npar= 589

## Computational Details

All calculations were carried out with the Gaussian 09 programs.<sup>8</sup> The geometries of all the species were fully optimized by using the density functional theory (DFT) method with the M06<sup>9</sup> functional. The 6-31G (d, p)<sup>10</sup> basis set was used for C, H, N, O, F and S as well as the Lanl (Los Alamos National Laboratory) basis sets, also known as LanL2DZ (Lanl-2-double zeta),<sup>11</sup> for Zn. Frequency calculations at the same theoretical level were performed to confirm each stationary point to be either a local minimum or a transition state (TS). The transition states were verified by intrinsic reaction coordinate (IRC)<sup>12</sup> calculations. The solvent effects of DCE ( $\epsilon = 10.125$ ) were taken in account by using the SMD-flavor<sup>13</sup> of self-consistent reaction field (SCRF) theory.

### Reference:

1. N. Riddell, W. Tam, *J. Org. Chem.* **2006**, *71*, 1934.
2. G. Zhu, W. Kong, H. Feng, Z. Qian, *J. Org. Chem.* **2014**, *79*, 1786.
3. T. V. Hansen, P. Wu, V. V. Fokin, *J. Org. Chem.* **2005**, *70*, 7761.
4. W.-B. Shen, X.-Y. Xiao, Q. Sun, B. Zhou, X.-Q. Zhu, J.-Z. Yan, X. Lu, L.-W. Ye, *Angew. Chem. Int. Ed.* **2017**, *56*, 605.
5. A.-H. Zhou, Q. He, C. Shu, Y.-F. Yu, S. Liu, T. Zhao, W. Zhang, X. Lu, L.-W. Ye, *Chem. Sci.* **2015**, *6*, 1265.
6. Y. Zheng, X. Li, C. Ren, D. Zhang-Negrerie, Y. Du, K. Zhao, *J. Org. Chem.* **2012**, *77*, 10353.
7. P.-C. Too, T. Noji, Y.-J. Lim, X. Li, S. Chiba, *Synlett* **2011**, *19*, 2789.

8. Gaussian 09, Revision E.01, M. J. Frisch, G. W. Trucks, H. B. Schlegel, G. E. Scuseria, M. A. Robb, J. R. Cheeseman, G. Scalmani, V. Barone, B. Mennucci, G. A. Petersson, H. Nakatsuji, M. Caricato, X. Li, H. P. Hratchian, A. F. Izmaylov, J. Bloino, G. Zheng, J. L. Sonnenberg, M. Hada, M. Ehara, K. Toyota, R. Fukuda, J. Hasegawa, M. Ishida, T. Nakajima, Y. Honda, O. Kitao, H. Nakai, T. Vreven, J. A. Montgomery, Jr., J. E. Peralta, F. Ogliaro, M. Bearpark, J. J. Heyd, E. Brothers, K. N. Kudin, V. N. Staroverov, R. Kobayashi, J. Normand, K. Raghavachari, A. Rendell, J. C. Burant, S. S. Iyengar, J. Tomasi, M. Cossi, N. Rega, J. M. Millam, M. Klene, J. E. Knox, J. B. Cross, V. Bakken, C. Adamo, J. Jaramillo, R. Gomperts, R. E. Stratmann, O. Yazyev, A. J. Austin, R. Cammi, C. Pomelli, J. W. Ochterski, R. L. Martin, K. Morokuma, V. G. Zakrzewski, G. A. Voth, P. Salvador, J. J. Dannenberg, S. Dapprich, A. D. Daniels, O. Farkas, J. B. Foresman, J. V. Ortiz, J. Cioslowski, D. J. Fox, Gaussian, Inc., Wallingford CT, **2013**.
9. Y. Zhao, D. G. Truhlar, *Theor. Chem. Acc.* **2008**, *120*, 215.
10. a) R. Ditchfield, W. J. Hehre, J. A. Pople, *J. Chem. Phys.* **1971**, *54*, 724; b) W. J. Hehre, R. Ditchfield, J. A. Pople, *J. Chem. Phys.* **1972**, *56*, 2257; c) P. C. Hariharan, J. A. Pople, *Theo. Chim. Acta.* **1973**, *28*, 213; d) P. C. Hariharan, J. A. Pople, *Mol. Phys.* **1974**, *27*, 209; e) M. S. Gordon, *Chem. Phys. Lett.* **1980**, *76*, 163.
11. P. J. Hay, W. R. Wadt, *J. Chem. Phys.* **1985**, *82*, 270.
12. C. Gonzalez, H. B. Schlegel, *J. Phys. Chem.* **1990**, *94*, 5523.
13. A. V. Marenich, C. J. Cramer, D. G. Truhlar, *J. Phys. Chem. B.* **2009**, *113*, 6378.

## Molecular Geometries and Energies

M06 (SMD, DCE) Cartesian Coordinates and Energies in Hartree

**1a**

Number of imaginary frequencies: 0

|   |             |            |            |
|---|-------------|------------|------------|
| C | -3.29825700 | 2.88277600 | 2.72331000 |
| C | -1.95158800 | 2.75279300 | 2.41134600 |
| C | -1.34097800 | 3.65887100 | 1.52905500 |
| C | -2.10903700 | 4.69082300 | 0.96599800 |
| C | -3.45734600 | 4.80571900 | 1.27743600 |
| C | -4.05553600 | 3.90588600 | 2.15702400 |
| H | -3.76063100 | 2.17780600 | 3.41053300 |
| H | -1.35764300 | 1.95184900 | 2.84613800 |
| H | -1.63680000 | 5.39403000 | 0.28356500 |
| H | -4.04448700 | 5.60613600 | 0.83287800 |
| H | -5.11115000 | 4.00176300 | 2.40052900 |
| C | 0.04113100  | 3.53048400 | 1.20812100 |
| C | 1.22395800  | 3.41548700 | 0.93637700 |
| S | 2.84734100  | 3.28436800 | 0.48954900 |
| C | 3.53693400  | 2.44141700 | 1.98108500 |
| H | 4.58170800  | 2.25524800 | 1.70725800 |
| H | 3.03502100  | 1.47244600 | 2.07184900 |
| C | 3.41874600  | 3.26855800 | 3.23788200 |
| H | 3.85061800  | 2.72380700 | 4.08571200 |
| H | 3.94685900  | 4.22338300 | 3.13874300 |
| H | 2.36915000  | 3.47997100 | 3.47308500 |

Energy (0K) = -784.885886

Energy (0K) + ZPE = -784.718563

Enthalpy (298K) = -784.706557

Free Energy (298K) = -784.757208

**A**



Number of imaginary frequencies: 0

|   |             |             |             |
|---|-------------|-------------|-------------|
| C | -4.07682800 | 1.92892600  | 0.77367400  |
| C | -2.79961000 | 1.41183800  | 0.59990300  |
| C | -1.81144000 | 2.18711400  | -0.02042400 |
| C | -2.11780200 | 3.48121400  | -0.46955200 |
| C | -3.39957900 | 3.98358100  | -0.30352300 |
| C | -4.37859900 | 3.21016400  | 0.31860100  |
| H | -4.83964700 | 1.32730600  | 1.26087600  |
| H | -2.55610400 | 0.41321600  | 0.96392100  |
| H | -1.34370700 | 4.07227800  | -0.95381000 |
| H | -3.63609700 | 4.98364500  | -0.65860400 |
| H | -5.38163100 | 3.60951200  | 0.44799000  |
| C | -0.48049800 | 1.67336300  | -0.22997600 |
| C | 0.73715700  | 1.83556100  | -0.45760100 |
| C | 3.19474600  | 1.79273100  | 0.75210600  |
| H | 4.23873700  | 1.62343300  | 0.46386400  |
| H | 2.81900000  | 0.88589400  | 1.23937100  |
| C | 3.01285100  | 3.04210800  | 1.57527300  |
| H | 3.56044100  | 2.93746400  | 2.51882400  |
| H | 3.39538900  | 3.92746200  | 1.05613100  |
| H | 1.95700900  | 3.20949300  | 1.81724800  |
| S | 1.99690800  | -1.82914300 | -0.01612100 |
| O | 1.35733200  | -0.90776300 | 0.96316400  |
| O | 3.40418300  | -1.62745700 | -0.31008600 |
| S | -2.44555300 | -2.41221500 | -0.40302200 |
| O | -2.01451100 | -1.66165300 | -1.62047300 |
| O | -1.51733400 | -1.99034000 | 0.69674900  |
| C | -1.95245300 | -4.15204600 | -0.72309200 |
| O | -3.86223300 | -2.44314000 | -0.09500600 |
| F | -2.07985100 | -4.84466600 | 0.39606600  |
| F | -0.69699200 | -4.19004300 | -1.12904200 |

|    |             |             |             |
|----|-------------|-------------|-------------|
| F  | -2.73630600 | -4.66635600 | -1.65465800 |
| C  | 1.90249200  | -3.50105500 | 0.74492200  |
| O  | 1.06902800  | -1.91667200 | -1.19419600 |
| F  | 2.76551100  | -3.56411600 | 1.74600800  |
| F  | 0.68771300  | -3.73908500 | 1.20005500  |
| F  | 2.21745900  | -4.40266500 | -0.17029300 |
| Zn | -0.43215200 | -0.55737900 | -0.48371600 |
| S  | 2.33461800  | 1.89224000  | -0.88871700 |

Energy (0K) = -2772.8715957

Energy (0K) + ZPE = -2772.640850

Enthalpy (298K) = -2772.611465

Free Energy (298K) = -2772.700439

## 2a

Number of imaginary frequencies: 0

|   |             |             |             |
|---|-------------|-------------|-------------|
| C | 0.08003600  | 1.31100900  | -0.03167700 |
| C | 1.43567500  | 1.24041900  | 0.03919200  |
| C | 1.85720400  | 2.59592700  | -0.03005800 |
| H | 2.04968400  | 0.35432900  | 0.12601900  |
| C | 3.24038700  | 3.13506400  | 0.00014700  |
| H | 3.75378300  | 2.84121600  | 0.92233800  |
| H | 3.82839100  | 2.74611100  | -0.83857800 |
| H | 3.22635700  | 4.22712800  | -0.06007800 |
| C | -0.99660400 | 0.29973400  | -0.01765700 |
| H | -1.68827200 | 0.47654200  | 0.81380800  |
| H | -1.58021000 | 0.33565300  | -0.94474500 |
| H | -0.57164500 | -0.70141400 | 0.08825800  |
| N | 0.83158700  | 3.41169600  | -0.13346500 |
| O | -0.29667900 | 2.59748800  | -0.13512800 |

Energy (0K) = -324.469373

Energy (0K) + ZPE = -324.356301

Enthalpy (298K) = -324.348467

Free Energy (298K) = -324.387087

### TS<sub>B</sub>

Number of imaginary frequencies: 1

|   |             |             |             |
|---|-------------|-------------|-------------|
| C | -3.71016800 | 2.45925900  | 0.01246100  |
| C | -2.55047400 | 1.70127300  | -0.09201400 |
| C | -1.56265300 | 2.03388900  | -1.03121200 |
| C | -1.78673500 | 3.11426100  | -1.89890400 |
| C | -2.95718600 | 3.85604600  | -1.80324200 |
| C | -3.91551900 | 3.53911900  | -0.84199000 |
| H | -4.45828800 | 2.19938300  | 0.75738400  |
| H | -2.38993900 | 0.85547400  | 0.57786000  |
| H | -1.04291600 | 3.35830600  | -2.65407800 |
| H | -3.12364600 | 4.68683000  | -2.48515100 |
| H | -4.82807700 | 4.12610700  | -0.76905300 |
| C | -0.32681400 | 1.25854200  | -1.08926800 |
| C | 0.91045600  | 1.59600300  | -1.26049800 |
| S | 2.46327200  | 1.15401300  | -1.72066000 |
| C | 3.47934700  | 1.58082000  | -0.23020000 |
| H | 4.15811800  | 0.72588000  | -0.12920900 |
| H | 2.79866500  | 1.55358500  | 0.62712900  |
| C | 4.22202300  | 2.88783700  | -0.38081600 |
| H | 4.88550400  | 3.02682000  | 0.48090500  |
| H | 4.84321400  | 2.89628800  | -1.28342900 |
| H | 3.54094200  | 3.74491700  | -0.42297100 |
| S | 1.97298500  | -1.64661900 | 0.79059700  |
| O | 1.45355100  | -0.41172200 | 1.39410700  |
| O | 3.39249800  | -1.71302300 | 0.47265900  |
| S | -2.46247600 | -2.49027700 | 0.15264200  |
| O | -1.92948800 | -2.25416300 | -1.22712700 |

|    |             |             |             |
|----|-------------|-------------|-------------|
| O  | -1.65292800 | -1.64428300 | 1.07901500  |
| C  | -1.93999200 | -4.20798400 | 0.53453900  |
| O  | -3.90411900 | -2.47007000 | 0.31609900  |
| F  | -2.22373200 | -4.47841700 | 1.79787000  |
| F  | -0.64219600 | -4.33601200 | 0.33282700  |
| F  | -2.59338900 | -5.04611600 | -0.25407200 |
| C  | 1.71622300  | -2.95007700 | 2.05614300  |
| O  | 1.06619000  | -2.10331400 | -0.32562300 |
| F  | 2.49571100  | -2.69530100 | 3.09808900  |
| F  | 0.45537000  | -2.96835500 | 2.45441100  |
| F  | 2.03579500  | -4.13369800 | 1.55313100  |
| Zn | -0.46793100 | -0.76554100 | -0.58566500 |
| C  | 1.46664800  | 5.69898800  | -1.79921600 |
| C  | 1.02313300  | 5.83565200  | -0.51952500 |
| C  | 0.75856200  | 4.51298400  | -0.08349500 |
| H  | 0.90304700  | 6.75122400  | 0.04318800  |
| C  | 0.23470600  | 4.04538800  | 1.22221100  |
| H  | 0.74668600  | 4.55637200  | 2.04342100  |
| H  | -0.83421100 | 4.27917700  | 1.30412400  |
| H  | 0.36423600  | 2.96453400  | 1.33970300  |
| C  | 1.91507600  | 6.65067000  | -2.83248200 |
| H  | 2.94312800  | 6.43221800  | -3.14176800 |
| H  | 1.27894400  | 6.58728000  | -3.72241000 |
| H  | 1.87301600  | 7.67031600  | -2.44307200 |
| N  | 1.03572000  | 3.66630400  | -1.05181400 |
| O  | 1.47942700  | 4.39272400  | -2.13276900 |

Energy (0K) = -3097.3400039

Energy (0K) + ZPE = -3096.994813

Enthalpy (298K) = -3096.957895

Free Energy (298K) = -3097.066561

**B**

Number of imaginary frequencies: 0

|   |             |             |             |
|---|-------------|-------------|-------------|
| C | -3.71882700 | 2.47250500  | 0.08250100  |
| C | -2.52465500 | 1.77119500  | -0.03255500 |
| C | -1.55053100 | 2.15126000  | -0.97030500 |
| C | -1.84058100 | 3.22291000  | -1.83174200 |
| C | -3.04509800 | 3.90852100  | -1.72999700 |
| C | -3.98221400 | 3.54587100  | -0.76450800 |
| H | -4.45126300 | 2.16980700  | 0.82729500  |
| H | -2.32480700 | 0.92474700  | 0.62661400  |
| H | -1.12601000 | 3.50315800  | -2.60468800 |
| H | -3.25622400 | 4.72892100  | -2.41250900 |
| H | -4.92227900 | 4.08694500  | -0.68526700 |
| C | -0.28651000 | 1.40330900  | -1.02448900 |
| C | 0.91171500  | 2.00299700  | -1.17322500 |
| S | 2.42819200  | 1.15795400  | -1.51813000 |
| C | 3.50803200  | 1.68992400  | -0.12322200 |
| H | 4.17092400  | 0.82963500  | 0.02924100  |
| H | 2.87580300  | 1.75135200  | 0.76974300  |
| C | 4.28729000  | 2.95966900  | -0.38516400 |
| H | 4.98732400  | 3.14526900  | 0.43864900  |
| H | 4.86963300  | 2.88586100  | -1.31046600 |
| H | 3.63591000  | 3.83824000  | -0.46579500 |
| S | 1.96259300  | -1.52718000 | 0.88870700  |
| O | 1.39408800  | -0.35632200 | 1.56478400  |
| O | 3.39697100  | -1.54241000 | 0.62755300  |
| S | -2.40466800 | -2.37185300 | 0.06297100  |
| O | -1.81958900 | -2.07776200 | -1.28775200 |
| O | -1.65494300 | -1.57800200 | 1.06593800  |
| C | -1.90159700 | -4.10894300 | 0.37476800  |
| O | -3.85572100 | -2.37220400 | 0.14445500  |

|    |             |             |             |
|----|-------------|-------------|-------------|
| F  | -2.21664200 | -4.43533500 | 1.61927900  |
| F  | -0.60037100 | -4.24363700 | 0.19875200  |
| F  | -2.54063300 | -4.91167900 | -0.46383300 |
| C  | 1.69492600  | -2.91901800 | 2.05348400  |
| O  | 1.11959600  | -1.95095100 | -0.28634900 |
| F  | 2.44191700  | -2.72993500 | 3.13507100  |
| F  | 0.42494900  | -2.98618900 | 2.41777300  |
| F  | 2.04806600  | -4.06281300 | 1.48231900  |
| Zn | -0.37415800 | -0.60543000 | -0.69654000 |
| C  | 1.43805000  | 5.42391100  | -1.86568200 |
| C  | 0.98325300  | 5.58574000  | -0.58762600 |
| C  | 0.73131600  | 4.29332900  | -0.09846900 |
| H  | 0.85353200  | 6.51508600  | -0.05142500 |
| C  | 0.22013500  | 3.87259500  | 1.21899600  |
| H  | 0.70372600  | 4.46134900  | 2.00357200  |
| H  | -0.85784900 | 4.07379600  | 1.26826300  |
| H  | 0.38089300  | 2.80603100  | 1.39981800  |
| C  | 1.88651800  | 6.35618900  | -2.90978900 |
| H  | 2.92812500  | 6.15201200  | -3.18109700 |
| H  | 1.27680100  | 6.24259500  | -3.81277400 |
| H  | 1.80471200  | 7.38276800  | -2.54801900 |
| N  | 1.02676900  | 3.43209300  | -1.07072400 |
| O  | 1.47272600  | 4.11563200  | -2.17962100 |

Energy (0K) = -3097.372088

Energy (0K) + ZPE = -3097.024913

Enthalpy (298K) = -3096.987984

Free Energy (298K) = -3097.094028

### TS<sub>c</sub>

Number of imaginary frequencies: 1

|   |             |            |            |
|---|-------------|------------|------------|
| C | -3.85986200 | 2.56073900 | 0.72377100 |
|---|-------------|------------|------------|

|   |             |             |             |
|---|-------------|-------------|-------------|
| C | -2.67194200 | 1.85233800  | 0.77968700  |
| C | -1.52127200 | 2.30780400  | 0.09741700  |
| C | -1.62737200 | 3.48060100  | -0.68642500 |
| C | -2.82775400 | 4.16589600  | -0.76591100 |
| C | -3.94044400 | 3.71627000  | -0.05359400 |
| H | -4.72930900 | 2.20853400  | 1.27246900  |
| H | -2.60823300 | 0.94894600  | 1.38682500  |
| H | -0.76718200 | 3.81933800  | -1.25925900 |
| H | -2.90282400 | 5.05437600  | -1.38775000 |
| H | -4.87895900 | 4.26210600  | -0.11535300 |
| C | -0.30836500 | 1.54018600  | 0.19025200  |
| C | 0.95868000  | 2.10791900  | 0.04891100  |
| S | 2.34068200  | 1.13041800  | -0.47956300 |
| C | 3.67275900  | 1.71724300  | 0.64353800  |
| H | 4.33214500  | 0.84724200  | 0.73629500  |
| H | 3.21115400  | 1.86695700  | 1.62701000  |
| C | 4.41794300  | 2.93505900  | 0.14453800  |
| H | 5.22951400  | 3.18416400  | 0.83912800  |
| H | 4.86307700  | 2.74992800  | -0.83964900 |
| H | 3.76091600  | 3.80772700  | 0.05829500  |
| S | 1.98060400  | -1.24577400 | 2.23843300  |
| O | 1.45368700  | 0.02095800  | 2.76636600  |
| O | 3.40680900  | -1.33366400 | 1.95773200  |
| S | -2.43204200 | -2.19911700 | 1.48694100  |
| O | -1.82545700 | -2.00467500 | 0.13096400  |
| O | -1.70830400 | -1.29750700 | 2.42615300  |
| C | -1.89887700 | -3.88411100 | 1.97773500  |
| O | -3.88258300 | -2.21089800 | 1.55801600  |
| F | -2.23309900 | -4.09384400 | 3.24116500  |
| F | -0.59180600 | -3.99951900 | 1.84164500  |
| F | -2.50271900 | -4.77615800 | 1.20840200  |

|    |             |             |             |
|----|-------------|-------------|-------------|
| C  | 1.70059500  | -2.48278900 | 3.56562800  |
| O  | 1.09343000  | -1.77344400 | 1.14122700  |
| F  | 2.44129800  | -2.16328300 | 4.61941700  |
| F  | 0.42761500  | -2.50444800 | 3.92503900  |
| F  | 2.05204600  | -3.68787000 | 3.13809000  |
| Zn | -0.42625200 | -0.44817800 | 0.74015400  |
| C  | 1.35864800  | 5.69773600  | -0.26470900 |
| C  | 0.99409600  | 5.55358500  | 1.07563100  |
| C  | 0.90666400  | 4.20615900  | 1.39363600  |
| H  | 0.86364200  | 6.35963900  | 1.78557300  |
| C  | 0.57852700  | 3.64576800  | 2.73358400  |
| H  | 0.77815300  | 4.38967000  | 3.50825100  |
| H  | -0.48800300 | 3.38913800  | 2.76760800  |
| H  | 1.14847900  | 2.73239100  | 2.93087500  |
| C  | 1.63561200  | 6.98738400  | -0.95143700 |
| H  | 2.69285200  | 7.02845000  | -1.23657300 |
| H  | 1.04539000  | 7.05526300  | -1.87095000 |
| H  | 1.40326100  | 7.83411900  | -0.30140000 |
| N  | 1.17932400  | 3.37884200  | 0.39114700  |
| O  | 1.49429000  | 4.61208800  | -0.92893600 |

Energy (0K) = -3097.3475014

Energy (0K) + ZPE = -3097.002700

Enthalpy (298K) = -3096.965908

Free Energy (298K) = -3097.070223

**C**

Number of imaginary frequencies: 0

|   |             |            |             |
|---|-------------|------------|-------------|
| C | -2.78218800 | 1.46859900 | -3.42728400 |
| C | -1.83500900 | 1.16563300 | -2.47289600 |
| C | -0.64377200 | 1.94239200 | -2.36671000 |
| C | -0.44305200 | 3.03237000 | -3.27217900 |



|   |             |             |             |
|---|-------------|-------------|-------------|
| C | -1.39223100 | 3.31991400  | -4.22275500 |
| C | -2.55713800 | 2.53982000  | -4.29610900 |
| H | -3.69310900 | 0.88305300  | -3.50545200 |
| H | -1.98602400 | 0.34011000  | -1.77432700 |
| H | 0.47003700  | 3.62214800  | -3.20858100 |
| H | -1.24687300 | 4.13994200  | -4.91950200 |
| H | -3.30229600 | 2.77456200  | -5.05277800 |
| C | 0.28241800  | 1.59862100  | -1.38488900 |
| C | 1.48617200  | 2.39491700  | -1.19299800 |
| S | 2.90019000  | 1.69726400  | -1.99535200 |
| C | 4.15795200  | 2.97315100  | -1.59868000 |
| H | 5.10938400  | 2.44468900  | -1.72182300 |
| H | 4.04302500  | 3.21628000  | -0.53752300 |
| C | 4.06603200  | 4.19171700  | -2.48893500 |
| H | 4.19175000  | 3.92548600  | -3.54394900 |
| H | 3.10247400  | 4.70102300  | -2.37132200 |
| H | 4.85700000  | 4.90293200  | -2.22295000 |
| S | 1.51739100  | -2.40727000 | -0.11542400 |
| O | 1.84422900  | -1.08787900 | 0.52340000  |
| O | 2.59705500  | -3.03988600 | -0.85533700 |
| S | -2.68914500 | -1.05136700 | 1.02247500  |
| O | -2.94558700 | -1.01801100 | -0.41959800 |
| O | -1.27288000 | -0.68230600 | 1.37654900  |
| C | -2.73930500 | -2.83170000 | 1.46218600  |
| O | -3.67199800 | -0.42904400 | 1.90105700  |
| F | -2.37013500 | -3.00008100 | 2.72402200  |
| F | -1.94019700 | -3.53128800 | 0.67517700  |
| F | -3.98187800 | -3.27784800 | 1.31417500  |
| C | 1.23436200  | -3.49650300 | 1.33617700  |
| O | 0.19764800  | -2.28392900 | -0.77003300 |
| F | 2.36376700  | -3.61652900 | 2.01927300  |

|    |             |             |             |
|----|-------------|-------------|-------------|
| F  | 0.30446000  | -2.98302900 | 2.12506300  |
| F  | 0.84833700  | -4.69380600 | 0.92171700  |
| Zn | 0.11823400  | 0.03797700  | 0.06876700  |
| C  | 0.11856300  | 2.41418000  | 1.99277900  |
| C  | -0.04147600 | 3.69130200  | 1.35050200  |
| C  | 0.57196800  | 4.11825400  | 0.20394100  |
| H  | -0.67962200 | 4.41247700  | 1.85841000  |
| C  | 0.32438500  | 5.49189400  | -0.32827600 |
| H  | 1.26183800  | 6.06110100  | -0.34390600 |
| H  | -0.02362400 | 5.42768900  | -1.36820300 |
| H  | -0.41717200 | 6.03329400  | 0.26415500  |
| C  | -0.56096400 | 2.23351400  | 3.31342500  |
| H  | -0.26767800 | 1.28487000  | 3.76805100  |
| H  | -0.33457200 | 3.06600100  | 3.98929400  |
| H  | -1.64889700 | 2.23495400  | 3.16231100  |
| N  | 1.55262700  | 3.45659500  | -0.48959600 |
| O  | 0.77149700  | 1.47190000  | 1.49648300  |

Energy (0K) = -3097.3851992

Energy (0K) + ZPE = -3097.040218

Enthalpy (298K) = -3097.002666

Free Energy (298K) = -3097.109619

## TS<sub>D</sub>

Number of imaginary frequencies: 1

|   |             |             |            |
|---|-------------|-------------|------------|
| C | 0.32727900  | 0.38795100  | 4.50337400 |
| C | -0.23256000 | 0.77515600  | 3.29862800 |
| C | -0.05435700 | 2.09260800  | 2.82201300 |
| C | 0.69707500  | 3.00940400  | 3.59690600 |
| C | 1.26913900  | 2.60811400  | 4.78855600 |
| C | 1.08120000  | 1.29985600  | 5.24215700 |
| H | 0.18318400  | -0.62441300 | 4.87018000 |

|    |             |             |             |
|----|-------------|-------------|-------------|
| H  | -0.82141000 | 0.07481400  | 2.71003100  |
| H  | 0.83560400  | 4.02989100  | 3.24087200  |
| H  | 1.85739900  | 3.30838100  | 5.37516400  |
| H  | 1.52667100  | 0.98986000  | 6.18453200  |
| C  | -0.60894000 | 2.47339300  | 1.55830900  |
| C  | -0.66871200 | 3.84113900  | 1.16844500  |
| C  | -3.31947900 | 4.09950600  | 0.31514800  |
| H  | -2.75523000 | 3.55574700  | -0.45191700 |
| H  | -4.23512100 | 3.54134500  | 0.53629600  |
| C  | -3.58158400 | 5.52855100  | -0.10021500 |
| H  | -2.64549300 | 6.05663500  | -0.31280400 |
| H  | -4.12696600 | 6.08218000  | 0.67139100  |
| H  | -4.18954700 | 5.53049600  | -1.01247100 |
| S  | 0.48927000  | -1.00567300 | -0.05715500 |
| O  | 0.70344900  | 0.30080400  | -0.74692700 |
| O  | 1.61177400  | -1.56023700 | 0.67897200  |
| S  | -3.96673000 | 0.08024500  | -0.60491400 |
| O  | -3.86024200 | 0.13734800  | 0.85436400  |
| O  | -2.68910100 | 0.54423700  | -1.26388500 |
| C  | -3.98405700 | -1.70408600 | -1.04344000 |
| O  | -5.16507200 | 0.62110500  | -1.23088500 |
| F  | -3.88595800 | -1.83968900 | -2.35843900 |
| F  | -2.98525500 | -2.34858200 | -0.46520000 |
| F  | -5.12991600 | -2.23572600 | -0.63696400 |
| C  | 0.16217000  | -2.17737400 | -1.42968800 |
| O  | -0.81918800 | -0.91951500 | 0.64982700  |
| F  | 1.23940800  | -2.27457900 | -2.19394600 |
| F  | -0.85239900 | -1.73844200 | -2.15627000 |
| F  | -0.13328400 | -3.36788100 | -0.93392500 |
| Zn | -1.23816700 | 1.18860600  | -0.03416600 |
| C  | 0.38641700  | 2.91706600  | -1.90214100 |

|   |             |            |             |
|---|-------------|------------|-------------|
| C | 1.35786000  | 3.75962000 | -1.24921500 |
| C | 1.16107500  | 4.52904300 | -0.14057200 |
| H | 2.33495900  | 3.83226800 | -1.72307500 |
| C | 2.23766100  | 5.39572400 | 0.41463400  |
| H | 2.40919500  | 5.14568600 | 1.46967200  |
| H | 1.92385500  | 6.44592100 | 0.38614100  |
| H | 3.17369400  | 5.28009500 | -0.13628300 |
| C | 0.79652000  | 2.28668700 | -3.19246900 |
| H | 0.09796700  | 1.49009900 | -3.46142800 |
| H | 1.81570200  | 1.89054700 | -3.12772900 |
| H | 0.79689500  | 3.04920200 | -3.98283900 |
| N | -0.05228900 | 4.70533500 | 0.49786700  |
| O | -0.75913000 | 2.71027200 | -1.44890800 |
| S | -2.32540800 | 4.03341700 | 1.87754500  |

Energy (0K) = -3097.3829364

Energy (0K) + ZPE = -3097.038654

Enthalpy (298K) = -3097.001535

Free Energy (298K) = -3097.106928

## D

Number of imaginary frequencies: 0

|   |             |             |            |
|---|-------------|-------------|------------|
| C | -0.07332500 | 0.13987300  | 4.54318200 |
| C | -0.32838900 | 1.05307600  | 3.52668400 |
| C | 0.71600200  | 1.53117100  | 2.72916000 |
| C | 2.01836600  | 1.07847200  | 2.96866000 |
| C | 2.26546600  | 0.16214500  | 3.98484100 |
| C | 1.22282300  | -0.31230500 | 4.77506200 |
| H | -0.89645300 | -0.22125500 | 5.15545700 |
| H | -1.34400600 | 1.40698300  | 3.35616600 |
| H | 2.84629900  | 1.43553200  | 2.35681700 |
| H | 3.28259300  | -0.18318500 | 4.15525500 |

|    |             |             |             |
|----|-------------|-------------|-------------|
| H  | 1.41873200  | -1.03111600 | 5.56688200  |
| C  | 0.41035400  | 2.45261000  | 1.58812300  |
| C  | 1.42172000  | 3.01126400  | 0.86119800  |
| C  | -2.29186300 | 2.81632500  | 0.78243900  |
| H  | -2.00068600 | 2.76556400  | -0.27535800 |
| H  | -2.39713600 | 1.79555100  | 1.17340000  |
| C  | -3.57737200 | 3.59622800  | 0.95002900  |
| H  | -3.48228900 | 4.61842400  | 0.56586100  |
| H  | -3.87967900 | 3.64833300  | 2.00212600  |
| H  | -4.37874600 | 3.09950100  | 0.39209400  |
| S  | 1.87504100  | -1.31071600 | 0.34587000  |
| O  | 2.05350900  | 0.07177100  | -0.22617200 |
| O  | 2.96821700  | -1.81897800 | 1.15266800  |
| S  | -2.55652900 | -0.65279500 | -0.88414800 |
| O  | -2.75215800 | -0.67384900 | 0.56479200  |
| O  | -1.20972100 | -0.09112200 | -1.28956900 |
| C  | -2.34499700 | -2.40549800 | -1.37889900 |
| O  | -3.64434400 | -0.15177400 | -1.71335600 |
| F  | -2.12322500 | -2.47986400 | -2.68404600 |
| F  | -1.32628100 | -2.94893500 | -0.73467600 |
| F  | -3.45143300 | -3.07645700 | -1.08785500 |
| C  | 1.84575300  | -2.36021800 | -1.15904200 |
| O  | 0.49436800  | -1.38556200 | 0.87788300  |
| F  | 3.03883500  | -2.33663200 | -1.73560300 |
| F  | 0.94315400  | -1.89840200 | -2.01018900 |
| F  | 1.54118900  | -3.60287800 | -0.82458100 |
| Zn | 0.05134800  | 0.77166300  | -0.00318400 |
| C  | 1.64526200  | 2.10542200  | -2.23738700 |
| C  | 2.78542500  | 2.99639400  | -2.03479400 |
| C  | 3.07843600  | 3.65479600  | -0.89178600 |
| H  | 3.49011500  | 3.10341600  | -2.85687000 |

|   |             |            |             |
|---|-------------|------------|-------------|
| C | 4.26242500  | 4.53123500 | -0.72053400 |
| H | 4.90169800  | 4.15165000 | 0.08584800  |
| H | 3.94054800  | 5.53745400 | -0.42500700 |
| H | 4.84241100  | 4.59218600 | -1.64368200 |
| C | 1.72610100  | 1.12048200 | -3.34549200 |
| H | 0.79394300  | 0.55466300 | -3.42589000 |
| H | 2.56153800  | 0.43511000 | -3.14624300 |
| H | 1.95163400  | 1.62645800 | -4.29185200 |
| N | 2.29963500  | 3.54088800 | 0.26060700  |
| O | 0.65902400  | 2.16270400 | -1.48906200 |
| S | -0.94847000 | 3.65416000 | 1.71549700  |

Energy (0K) = -3097.4073228

Energy (0K) + ZPE = -3097.060883

Enthalpy (298K) = -3097.023613

Free Energy (298K) = -3097.128645

### TS<sub>D1</sub>

Number of imaginary frequencies: 1

|   |             |            |             |
|---|-------------|------------|-------------|
| C | -3.00026500 | 1.95763900 | -3.09194000 |
| C | -2.08852900 | 1.67534900 | -2.08926900 |
| C | -0.85464300 | 2.35859400 | -2.03095800 |
| C | -0.55925500 | 3.32431100 | -3.02437600 |
| C | -1.46910600 | 3.59057500 | -4.02946200 |
| C | -2.69144000 | 2.91296000 | -4.05991200 |
| H | -3.94951800 | 1.43015400 | -3.12870000 |
| H | -2.31095900 | 0.92329200 | -1.33096800 |
| H | 0.39353000  | 3.85333600 | -3.00427900 |
| H | -1.23558300 | 4.32453900 | -4.79600000 |
| H | -3.40484300 | 3.12767400 | -4.85202100 |
| C | 0.05313000  | 2.05023200 | -0.96539200 |
| C | 1.40990900  | 2.62379500 | -0.99217900 |

|    |             |             |             |
|----|-------------|-------------|-------------|
| S  | 2.55686000  | 1.62118500  | -1.82107300 |
| C  | 4.12846100  | 2.53562400  | -1.55192400 |
| H  | 4.89545100  | 1.75879900  | -1.63901800 |
| H  | 4.11604800  | 2.89001200  | -0.51714900 |
| C  | 4.32383700  | 3.64757100  | -2.55685700 |
| H  | 4.32431800  | 3.26392000  | -3.58259600 |
| H  | 3.53907200  | 4.40641000  | -2.46752200 |
| H  | 5.29001800  | 4.13392800  | -2.37871000 |
| S  | 1.81813100  | -1.90648300 | -0.08178300 |
| O  | 1.94915800  | -0.65154900 | 0.72963300  |
| O  | 2.98290600  | -2.29855500 | -0.85741600 |
| S  | -2.50389900 | -1.01106900 | 1.33400700  |
| O  | -2.89251000 | -0.74629300 | -0.05382400 |
| O  | -1.08124400 | -0.59855300 | 1.62335000  |
| C  | -2.39540300 | -2.84065300 | 1.45153700  |
| O  | -3.42995000 | -0.62189700 | 2.38844500  |
| F  | -1.99485800 | -3.19572500 | 2.66343000  |
| F  | -1.54982200 | -3.32055900 | 0.55445800  |
| F  | -3.59932000 | -3.35297500 | 1.22721000  |
| C  | 1.62895700  | -3.21257600 | 1.19228900  |
| O  | 0.50769600  | -1.85943400 | -0.77119700 |
| F  | 2.77969600  | -3.37760400 | 1.82777700  |
| F  | 0.69810800  | -2.86521300 | 2.06374900  |
| F  | 1.28273500  | -4.35008100 | 0.60936100  |
| Zn | 0.10581300  | 0.29372900  | 0.25980000  |
| C  | -0.16795500 | 2.59041500  | 1.72814100  |
| C  | -0.36432800 | 3.62728000  | 0.70867400  |
| C  | 0.65836500  | 4.37106100  | 0.09905200  |
| H  | -1.30370700 | 4.17032900  | 0.82942700  |
| C  | 0.58258800  | 5.84264600  | -0.03945100 |
| H  | 1.51248200  | 6.28086200  | 0.34439800  |

|   |             |            |             |
|---|-------------|------------|-------------|
| H | 0.53930000  | 6.10679200 | -1.10537700 |
| H | -0.27197900 | 6.27350300 | 0.48466100  |
| C | -1.27185500 | 2.47650300 | 2.72970900  |
| H | -1.12030300 | 1.60132700 | 3.36484200  |
| H | -1.32514800 | 3.38593900 | 3.34095000  |
| H | -2.23340800 | 2.39360100 | 2.20431300  |
| N | 1.73283700  | 3.78013600 | -0.47692400 |
| O | 0.80096500  | 1.81928800 | 1.75282500  |

Energy (0K) = -3097.3639353

Energy (0K) + ZPE = -3097.019250

Enthalpy (298K) = -3096.982700

Free Energy (298K) = -3097.086244

## D1

Number of imaginary frequencies: 0

|   |             |            |             |
|---|-------------|------------|-------------|
| C | -3.44483000 | 1.62697800 | -2.83107000 |
| C | -2.45837700 | 1.67194800 | -1.85181900 |
| C | -1.25035000 | 2.34226200 | -2.07250900 |
| C | -1.06924000 | 2.99294100 | -3.30106900 |
| C | -2.05326600 | 2.95042900 | -4.28151600 |
| C | -3.24307800 | 2.26434300 | -4.05100800 |
| H | -4.36791900 | 1.08557000 | -2.63822500 |
| H | -2.63627700 | 1.16077000 | -0.90380500 |
| H | -0.14797700 | 3.54332000 | -3.48506900 |
| H | -1.89062900 | 3.45849300 | -5.22943200 |
| H | -4.01042700 | 2.22603400 | -4.82058400 |
| C | -0.18669600 | 2.43115600 | -1.03081100 |
| C | 1.18063600  | 2.30770300 | -1.29670900 |
| S | 1.88277700  | 1.50898100 | -2.66030600 |
| C | 3.68585400  | 1.61560700 | -2.31237500 |
| H | 4.09502400  | 0.81082400 | -2.93373400 |



|    |             |             |             |
|----|-------------|-------------|-------------|
| H  | 3.84052100  | 1.33142900  | -1.26704100 |
| C  | 4.28501800  | 2.95646300  | -2.66711500 |
| H  | 4.11493200  | 3.20687300  | -3.72008300 |
| H  | 3.86303700  | 3.75397600  | -2.04670500 |
| H  | 5.36769000  | 2.93063000  | -2.49592400 |
| S  | 2.01964000  | -0.76780600 | 0.52333300  |
| O  | 1.41376400  | 0.31353400  | 1.36607800  |
| O  | 3.39437000  | -0.57372400 | 0.09564000  |
| S  | -2.47704400 | -1.93225200 | 0.54226300  |
| O  | -2.50087900 | -1.79623300 | -0.91251900 |
| O  | -1.47289600 | -1.01385600 | 1.19755800  |
| C  | -1.72531100 | -3.57628300 | 0.85275900  |
| O  | -3.74969900 | -1.97381100 | 1.25033500  |
| F  | -1.54061100 | -3.75876500 | 2.15230200  |
| F  | -0.56210500 | -3.69042300 | 0.22970600  |
| F  | -2.54781700 | -4.51320200 | 0.39713300  |
| C  | 2.05858400  | -2.22034600 | 1.64588900  |
| O  | 1.01887400  | -1.11278800 | -0.52763000 |
| F  | 2.95123300  | -2.00218900 | 2.59895500  |
| F  | 0.87098400  | -2.40018200 | 2.19263900  |
| F  | 2.40306100  | -3.29512400 | 0.95781100  |
| Zn | -0.42859100 | 0.42248900  | 0.23673500  |
| C  | -1.08048400 | 3.07924700  | 1.30598900  |
| C  | -0.24501800 | 3.44512200  | 0.09718500  |
| C  | 1.22409800  | 3.56954600  | 0.46339700  |
| H  | -0.57808700 | 4.42574100  | -0.28450500 |
| C  | 1.72487300  | 4.29024800  | 1.64780300  |
| H  | 2.81541200  | 4.34461000  | 1.62455500  |
| H  | 1.29876300  | 5.29802200  | 1.71302100  |
| H  | 1.42171300  | 3.75116100  | 2.55786600  |
| C  | -1.70982000 | 4.16670600  | 2.08644200  |

|   |             |            |             |
|---|-------------|------------|-------------|
| H | -2.05315000 | 3.80734100 | 3.05829900  |
| H | -1.03966700 | 5.02655000 | 2.19329200  |
| H | -2.57471400 | 4.51975800 | 1.50603900  |
| N | 1.99941300  | 2.92974100 | -0.35061800 |
| O | -1.22040000 | 1.89646400 | 1.61578200  |

Energy (0K) = -3097.4527992

Energy (0K) + ZPE = -3097.103859

Enthalpy (298K) = -3097.067684

Free Energy (298K) = -3097.169333

### **TS<sub>D2</sub>**

Number of imaginary frequencies: 1

|   |             |            |             |
|---|-------------|------------|-------------|
| C | -3.31580300 | 1.75705300 | -2.42605700 |
| C | -2.28104700 | 1.21625800 | -1.68625200 |
| C | -1.04438200 | 1.89056500 | -1.56780100 |
| C | -0.87265800 | 3.11351300 | -2.25664700 |
| C | -1.90149800 | 3.63769500 | -3.01900800 |
| C | -3.12404700 | 2.96858200 | -3.09180600 |
| H | -4.26527700 | 1.23463000 | -2.50116500 |
| H | -2.40634000 | 0.25358900 | -1.18669700 |
| H | 0.08392300  | 3.62995300 | -2.21146200 |
| H | -1.75856100 | 4.57055400 | -3.55761900 |
| H | -3.93251600 | 3.39015900 | -3.68446700 |
| C | -0.00427500 | 1.28760100 | -0.78137200 |
| C | 1.28676200  | 1.97113600 | -0.64604300 |
| S | 2.57832000  | 1.00965100 | -1.35509800 |
| C | 3.91647200  | 2.24955800 | -1.51771500 |
| H | 4.80490200  | 1.63951700 | -1.71456000 |
| H | 4.04126200  | 2.71948600 | -0.53735300 |
| C | 3.67232400  | 3.25895900 | -2.61731500 |
| H | 3.54565700  | 2.76974600 | -3.58895900 |

|    |             |             |             |
|----|-------------|-------------|-------------|
| H  | 2.78209900  | 3.86501900  | -2.41293600 |
| H  | 4.52936200  | 3.93871600  | -2.68803200 |
| S  | 1.77844800  | -2.29961500 | 0.79566700  |
| O  | 1.47050300  | -0.93515300 | 1.32407800  |
| O  | 3.16241400  | -2.58627200 | 0.46324300  |
| S  | -2.85375700 | -2.11661900 | 0.76751300  |
| O  | -2.73298200 | -2.27972200 | -0.68333300 |
| O  | -1.67005800 | -1.37622100 | 1.33982300  |
| C  | -2.62665100 | -3.80019000 | 1.46178900  |
| O  | -4.12937400 | -1.66541400 | 1.30733900  |
| F  | -2.52424900 | -3.73754000 | 2.78115400  |
| F  | -1.53947300 | -4.36874300 | 0.96760400  |
| F  | -3.68101400 | -4.53968100 | 1.14236800  |
| C  | 1.38102000  | -3.40767800 | 2.20605400  |
| O  | 0.74682500  | -2.61727000 | -0.23408200 |
| F  | 2.29394300  | -3.24719500 | 3.15201400  |
| F  | 0.19052600  | -3.11242900 | 2.69786800  |
| F  | 1.38924500  | -4.66604600 | 1.79641000  |
| Zn | -0.28370600 | -0.60166000 | 0.08001900  |
| C  | -0.78927600 | 2.55582100  | 1.76448100  |
| C  | -0.32578300 | 3.82475200  | 1.31936200  |
| C  | 0.68471300  | 4.04662200  | 0.41552200  |
| H  | -0.76355200 | 4.69676200  | 1.80094400  |
| C  | 1.04845900  | 5.44591800  | 0.04137600  |
| H  | 2.10007000  | 5.63699600  | 0.28466000  |
| H  | 0.94964500  | 5.57464800  | -1.04509100 |
| H  | 0.41681700  | 6.18399700  | 0.54164700  |
| C  | -1.69845900 | 2.49850800  | 2.94486200  |
| H  | -1.94153400 | 1.46367100  | 3.19561100  |
| H  | -1.23654800 | 2.99628400  | 3.80496200  |
| H  | -2.62197200 | 3.04550000  | 2.71577400  |

|   |             |            |             |
|---|-------------|------------|-------------|
| N | 1.52797900  | 3.12782300 | -0.14478300 |
| O | -0.46364500 | 1.47495700 | 1.20607700  |

Energy (0K) = -3097.378941

Energy (0K) + ZPE = -3097.033781

Enthalpy (298K) = -3096.996748

Free Energy (298K) = -3097.102780

## D2

Number of imaginary frequencies: 0

|   |             |             |             |
|---|-------------|-------------|-------------|
| C | -3.25222300 | 2.49756500  | -2.00572200 |
| C | -2.23437000 | 2.07705200  | -1.16085800 |
| C | -0.89118000 | 2.33891500  | -1.47203900 |
| C | -0.59960000 | 3.01752100  | -2.66092900 |
| C | -1.62382800 | 3.41929400  | -3.51547700 |
| C | -2.95169800 | 3.16952200  | -3.18993700 |
| H | -4.28662500 | 2.28812600  | -1.74277400 |
| H | -2.48106700 | 1.53187100  | -0.24857600 |
| H | 0.43315900  | 3.23688600  | -2.93234800 |
| H | -1.37552100 | 3.94281200  | -4.43613800 |
| H | -3.74939000 | 3.49241400  | -3.85446800 |
| C | 0.18759000  | 1.81041700  | -0.57882700 |
| C | 1.52018700  | 2.47649400  | -0.75233200 |
| S | 2.80944400  | 1.44488700  | -1.26135300 |
| C | 4.19993400  | 2.61534900  | -1.49160300 |
| H | 5.08646500  | 1.97237900  | -1.47795700 |
| H | 4.23236100  | 3.24922800  | -0.59984100 |
| C | 4.10191500  | 3.41499600  | -2.77203700 |
| H | 4.07591500  | 2.76166900  | -3.65054000 |
| H | 3.20919300  | 4.05020000  | -2.78095400 |
| H | 4.97831000  | 4.06719500  | -2.86132200 |
| S | 2.12785100  | -1.84352600 | 0.52866800  |

|    |             |             |             |
|----|-------------|-------------|-------------|
| O  | 1.75548500  | -0.58542600 | 1.20570700  |
| O  | 3.53255800  | -2.10234700 | 0.26189400  |
| S  | -2.55627900 | -1.71724600 | 0.00778900  |
| O  | -2.30968300 | -1.93608700 | -1.41904000 |
| O  | -1.41809000 | -0.96599000 | 0.65152900  |
| C  | -2.40505400 | -3.38561700 | 0.75515400  |
| O  | -3.86707200 | -1.23682000 | 0.42247000  |
| F  | -2.36569200 | -3.30026500 | 2.07611600  |
| F  | -1.30679600 | -3.98530800 | 0.32181400  |
| F  | -3.45705700 | -4.11125700 | 0.39879800  |
| C  | 1.61547600  | -3.16737700 | 1.69490000  |
| O  | 1.20918000  | -2.03283800 | -0.65274700 |
| F  | 2.47204500  | -3.19939700 | 2.70541600  |
| F  | 0.40458600  | -2.92364800 | 2.16582500  |
| F  | 1.62532200  | -4.33662600 | 1.07560600  |
| Zn | 0.06223500  | -0.27862000 | -0.56995500 |
| C  | -0.46379900 | 3.13299800  | 1.40320300  |
| C  | -0.13368500 | 4.38012300  | 0.89616500  |
| C  | 0.81827700  | 4.63396600  | -0.09154400 |
| H  | -0.60398300 | 5.23616700  | 1.37380900  |
| C  | 1.00332300  | 6.01531700  | -0.60733400 |
| H  | 1.96476900  | 6.41405900  | -0.26077400 |
| H  | 1.05291900  | 5.98620600  | -1.70347100 |
| H  | 0.20055200  | 6.68516200  | -0.29214900 |
| C  | -1.25167800 | 2.96741500  | 2.64290500  |
| H  | -0.82295100 | 2.16102000  | 3.24767000  |
| H  | -1.29919800 | 3.89023800  | 3.22345800  |
| H  | -2.27057500 | 2.65443800  | 2.37609600  |
| N  | 1.70861700  | 3.74246100  | -0.56604300 |
| O  | -0.14414600 | 1.98310700  | 0.85305800  |

Energy (0K) = -3097.3991631

Energy (0K) + ZPE = -3097.053093

Enthalpy (298K) = -3097.016037

Free Energy (298K) = -3097.121946

## **H<sub>2</sub>O**

Number of imaginary frequencies: 0

|   |            |            |            |
|---|------------|------------|------------|
| O | 1.60711900 | 1.40696800 | 0.00000000 |
| H | 2.56870600 | 1.45719400 | 0.00000000 |
| H | 1.33332500 | 2.33034200 | 0.00000000 |

Energy (0K) = -76.3915317

Energy (0K) + ZPE = -76.370017

Enthalpy (298K) = -76.366237

Free Energy (298K) = -76.388322

## **3a**

Number of imaginary frequencies: 0

|   |             |             |             |
|---|-------------|-------------|-------------|
| C | -1.64937300 | 1.51222600  | -4.41510400 |
| C | -0.78800100 | 0.99857900  | -3.45454300 |
| C | 0.27245500  | 1.76761600  | -2.96564900 |
| C | 0.44644700  | 3.06646300  | -3.44871300 |
| C | -0.41636400 | 3.58070900  | -4.41370500 |
| C | -1.46300900 | 2.80569100  | -4.90146900 |
| H | -2.47124700 | 0.90286900  | -4.78465100 |
| H | -0.92576800 | -0.01488800 | -3.07861000 |
| H | 1.26224400  | 3.68496500  | -3.07602900 |
| H | -0.26786900 | 4.59280100  | -4.78364100 |
| H | -2.13765900 | 3.20822200  | -5.65369500 |
| C | 1.21863600  | 1.15971200  | -1.95767300 |
| C | 1.86261100  | 2.23842100  | -1.08905900 |
| S | 2.45425000  | 0.01989400  | -2.70180800 |
| C | 3.19269700  | 1.03686700  | -4.04056500 |

|   |             |             |             |
|---|-------------|-------------|-------------|
| H | 4.24045300  | 0.71667500  | -4.08174100 |
| H | 3.20109100  | 2.07637300  | -3.69665200 |
| C | 2.52507900  | 0.86388900  | -5.38898000 |
| H | 3.05218900  | 1.45327500  | -6.15019700 |
| H | 2.54396900  | -0.18560700 | -5.70509100 |
| H | 1.47919000  | 1.19161600  | -5.37267500 |
| C | -1.06677000 | 3.23449200  | 1.81506400  |
| C | 0.18383700  | 3.96291400  | 1.70862300  |
| C | 1.17155800  | 3.70256500  | 0.80304300  |
| H | 0.34427100  | 4.78323300  | 2.40446100  |
| C | 2.41664100  | 4.51878200  | 0.77386900  |
| H | 2.35791400  | 5.30427100  | 1.53172800  |
| H | 3.30031200  | 3.90078400  | 0.96298300  |
| H | 2.56595300  | 4.97674900  | -0.20970300 |
| C | -2.00968100 | 3.69853700  | 2.88763500  |
| H | -2.27495600 | 4.75108200  | 2.72875100  |
| H | -2.91577500 | 3.08797300  | 2.88748300  |
| H | -1.52587800 | 3.63955700  | 3.87040600  |
| N | 1.00284900  | 2.67231200  | -0.10099800 |
| O | -1.37224900 | 2.28463900  | 1.08124200  |
| O | 2.97525400  | 2.68979700  | -1.28315800 |
| H | 0.64228300  | 0.48766500  | -1.30600300 |
| H | 0.09352200  | 2.20470700  | 0.00283800  |

Energy (0K) = -1185.890419

Energy (0K) + ZPE = -1185.578773

Enthalpy (298K) = -1185.557584

Free Energy (298K) = -1185.630909

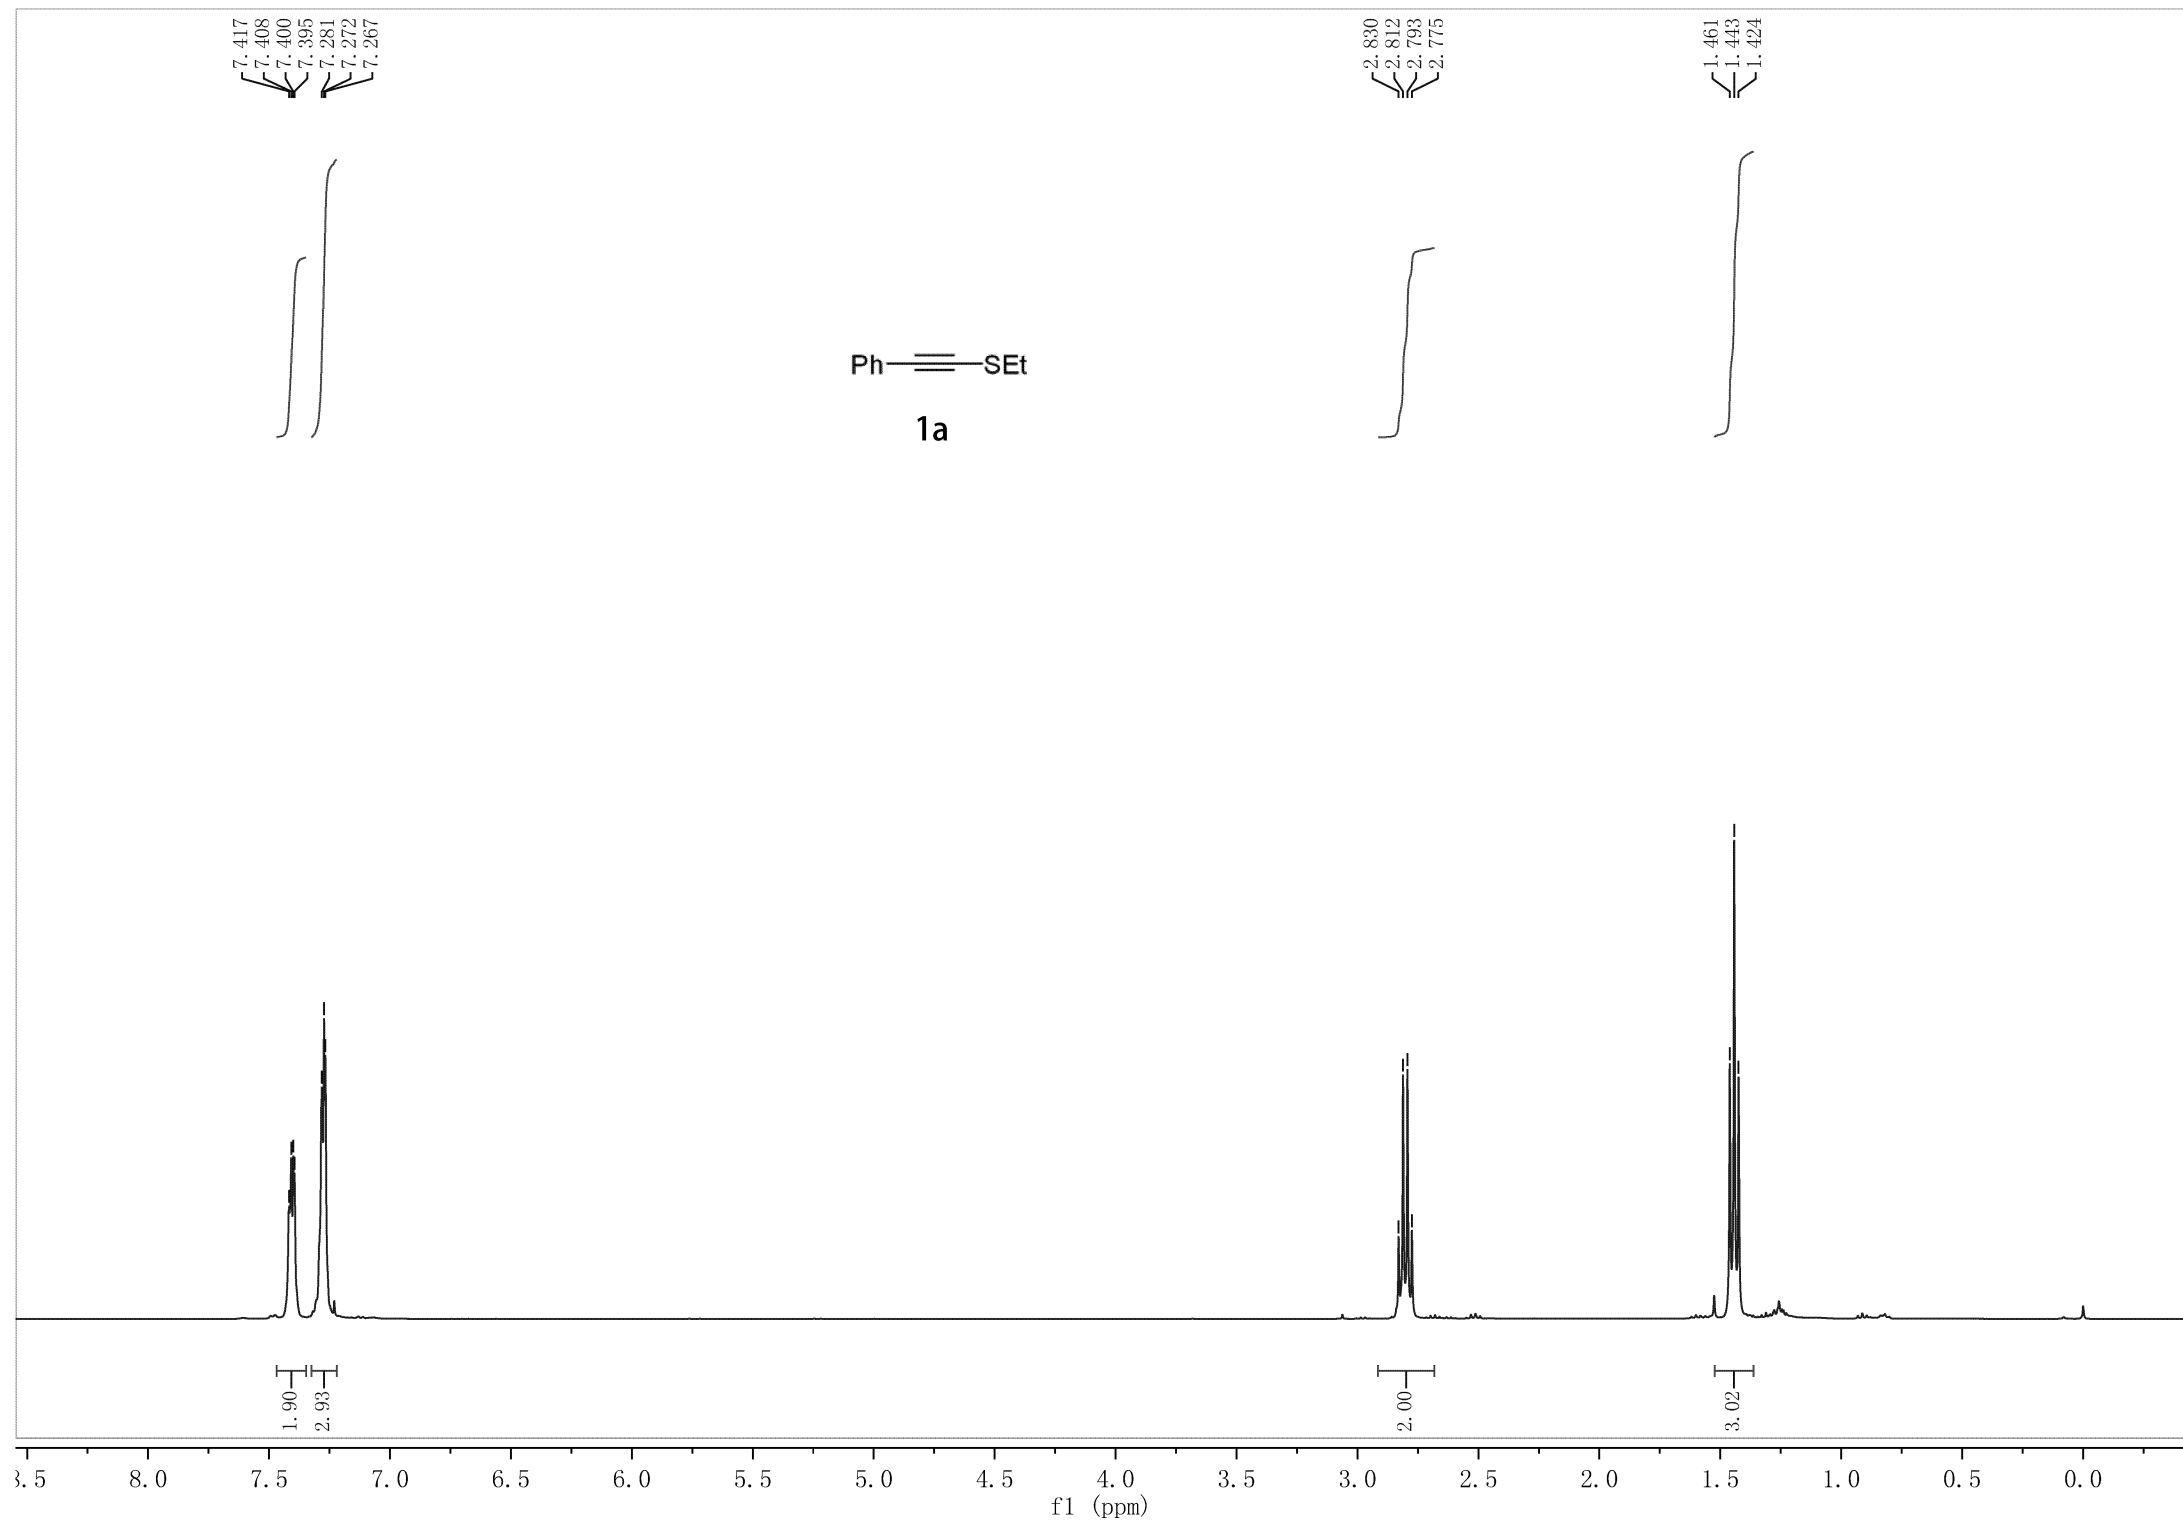



131.33  
128.21  
127.90  
123.49

93.43

79.19  
77.32  
77.00  
76.68

29.91

14.68

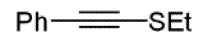

1a

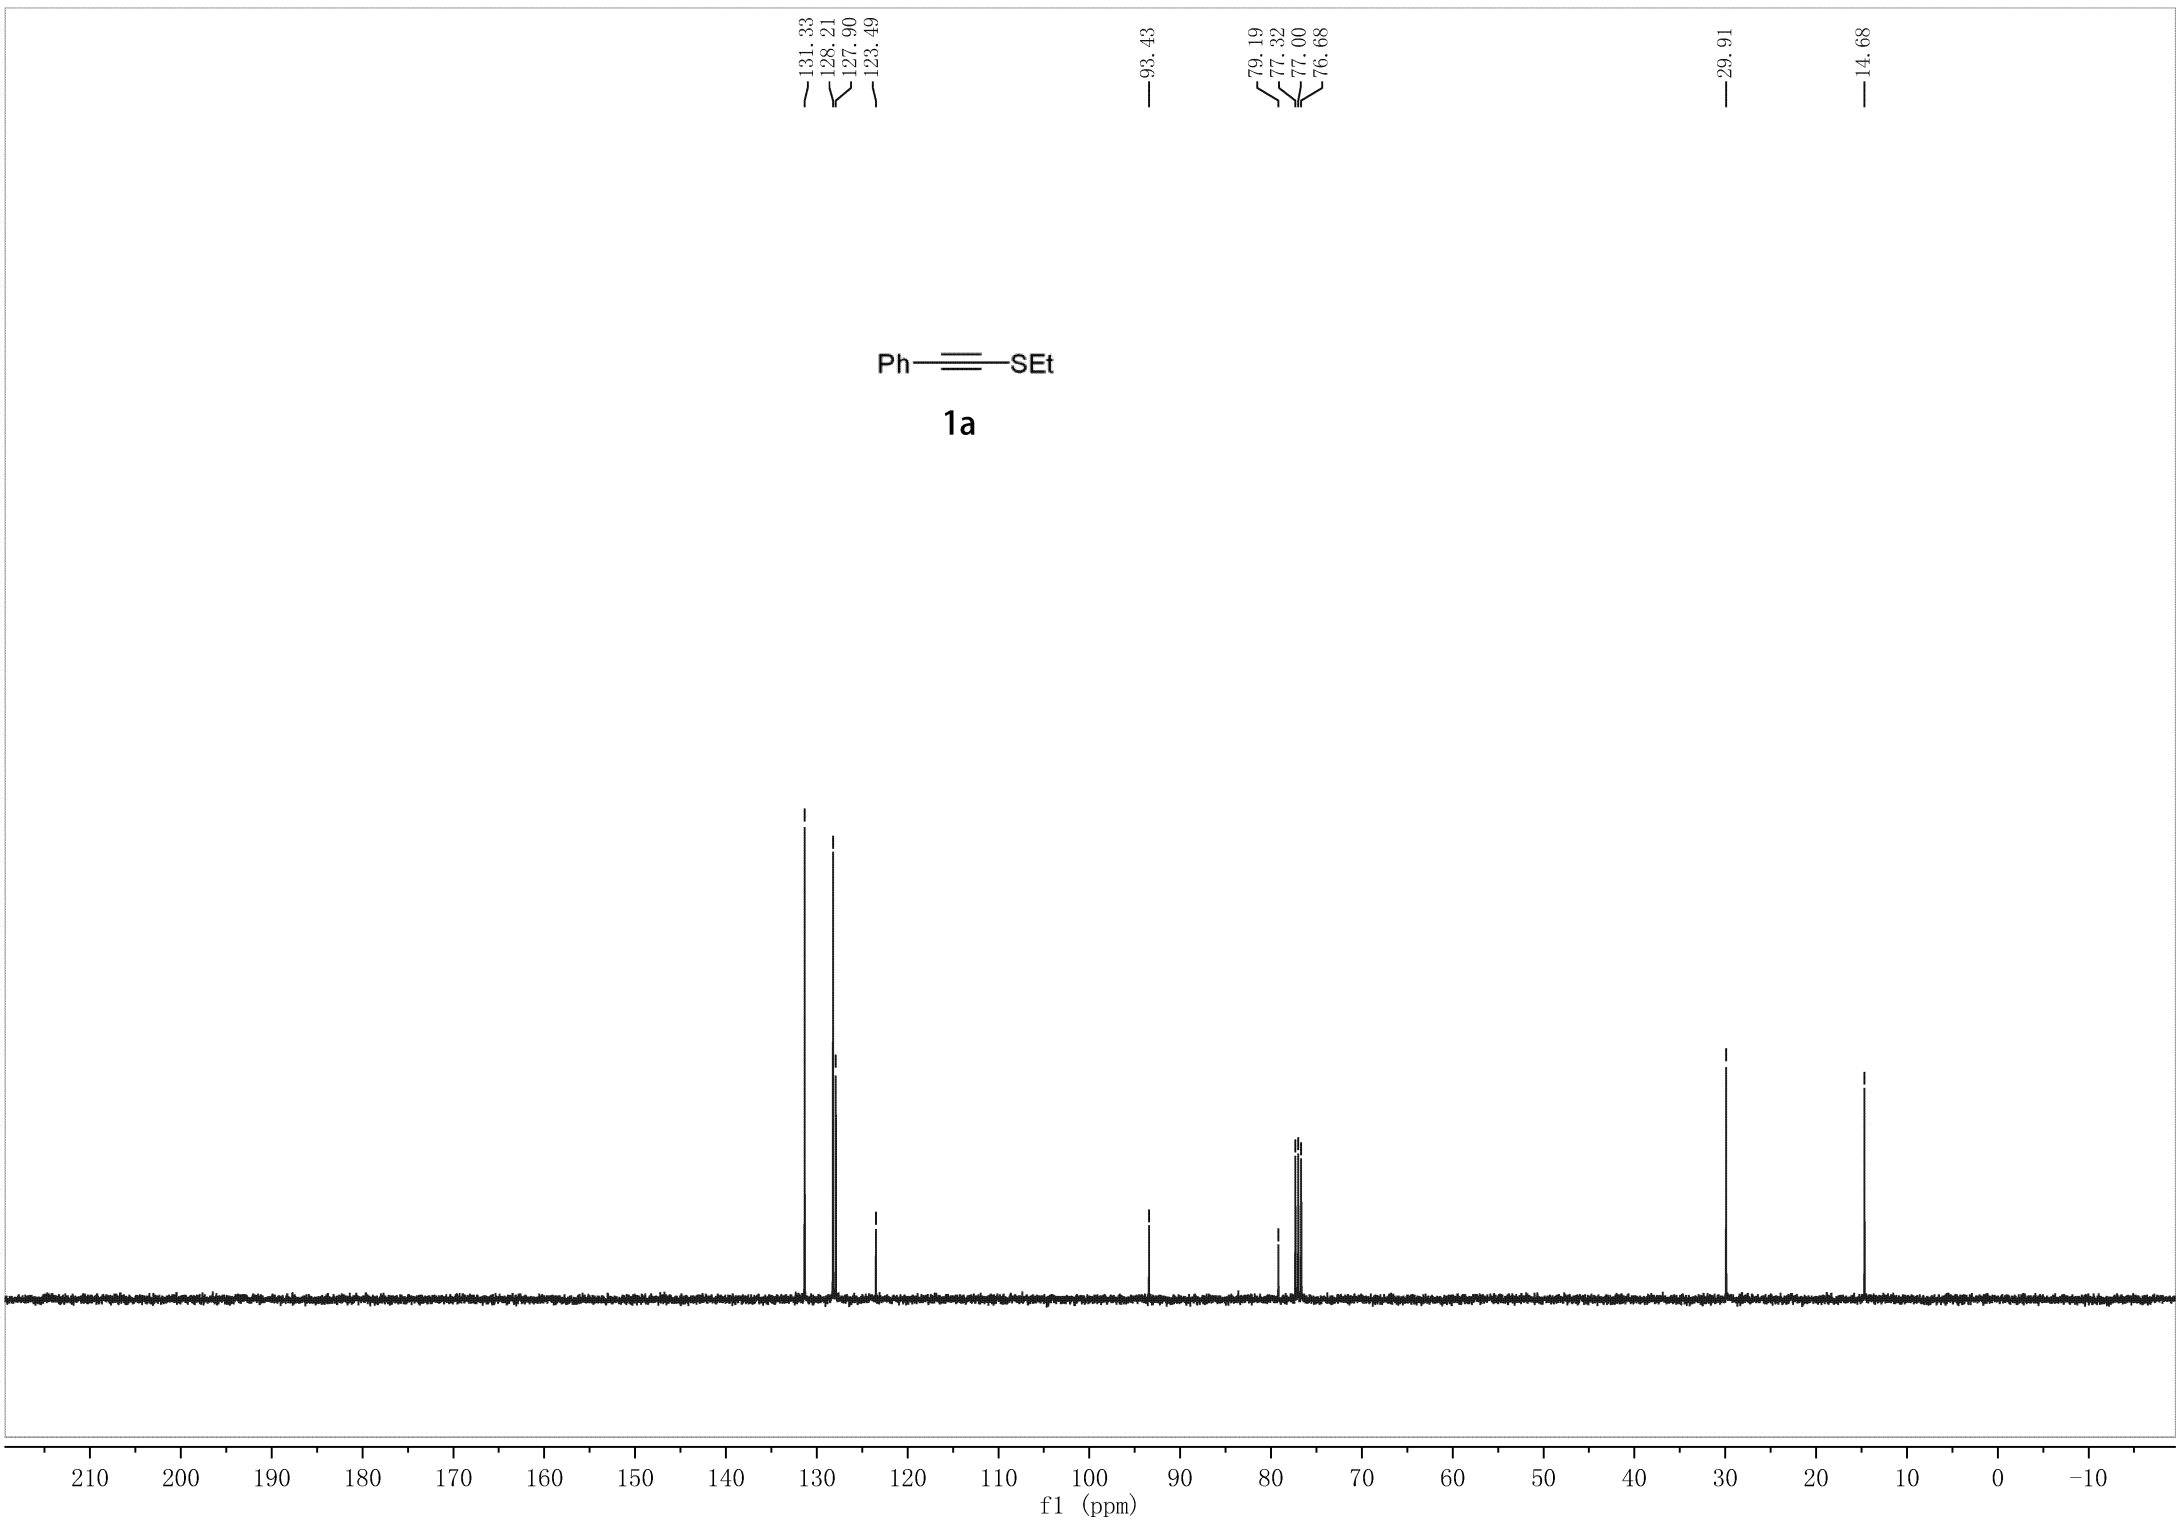

7.437  
7.432  
7.424  
7.415  
7.407  
7.402  
7.056  
7.032  
7.027  
7.010  
6.993  
6.989  
6.982

2.862  
2.844  
2.826  
2.808

1.488  
1.470  
1.452

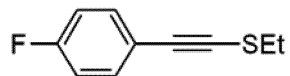

1b

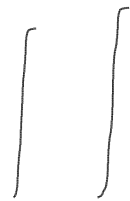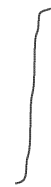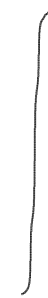

1.91

2.14

1.98

3.23

8.5 8.0 7.5 7.0 6.5 6.0 5.5 5.0 4.5 4.0 3.5 3.0 2.5 2.0 1.5 1.0 0.5 0.0 -0.5  
f1 (ppm)

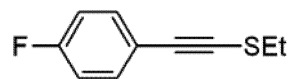

**1b**

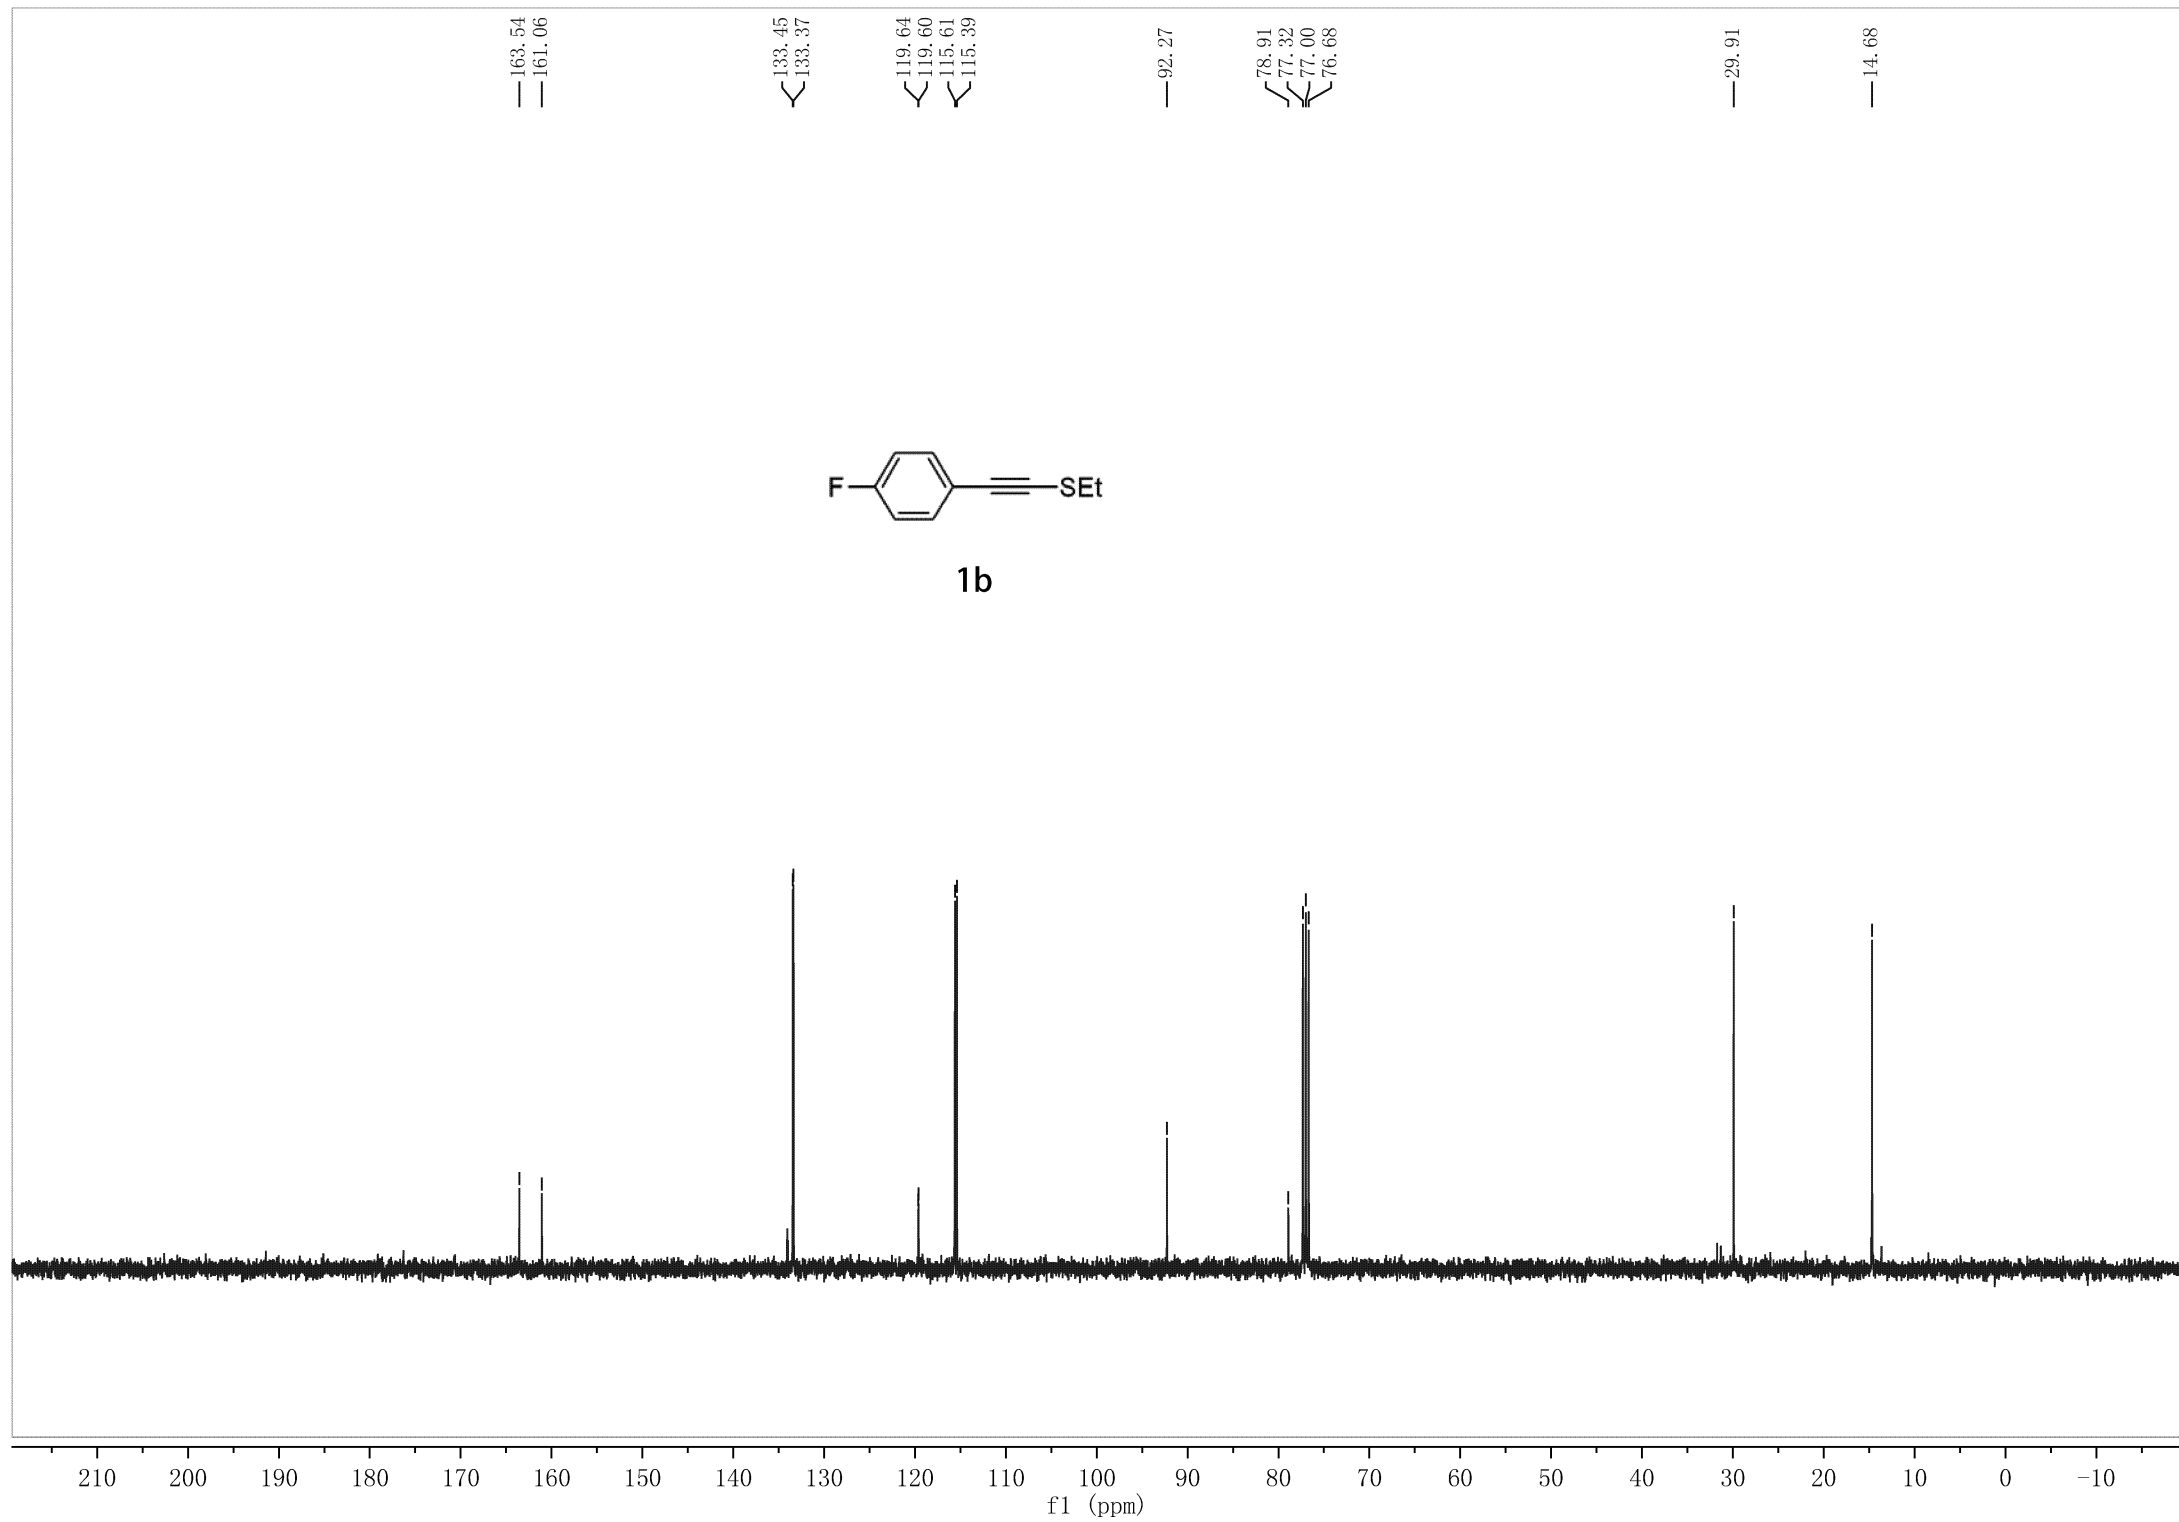

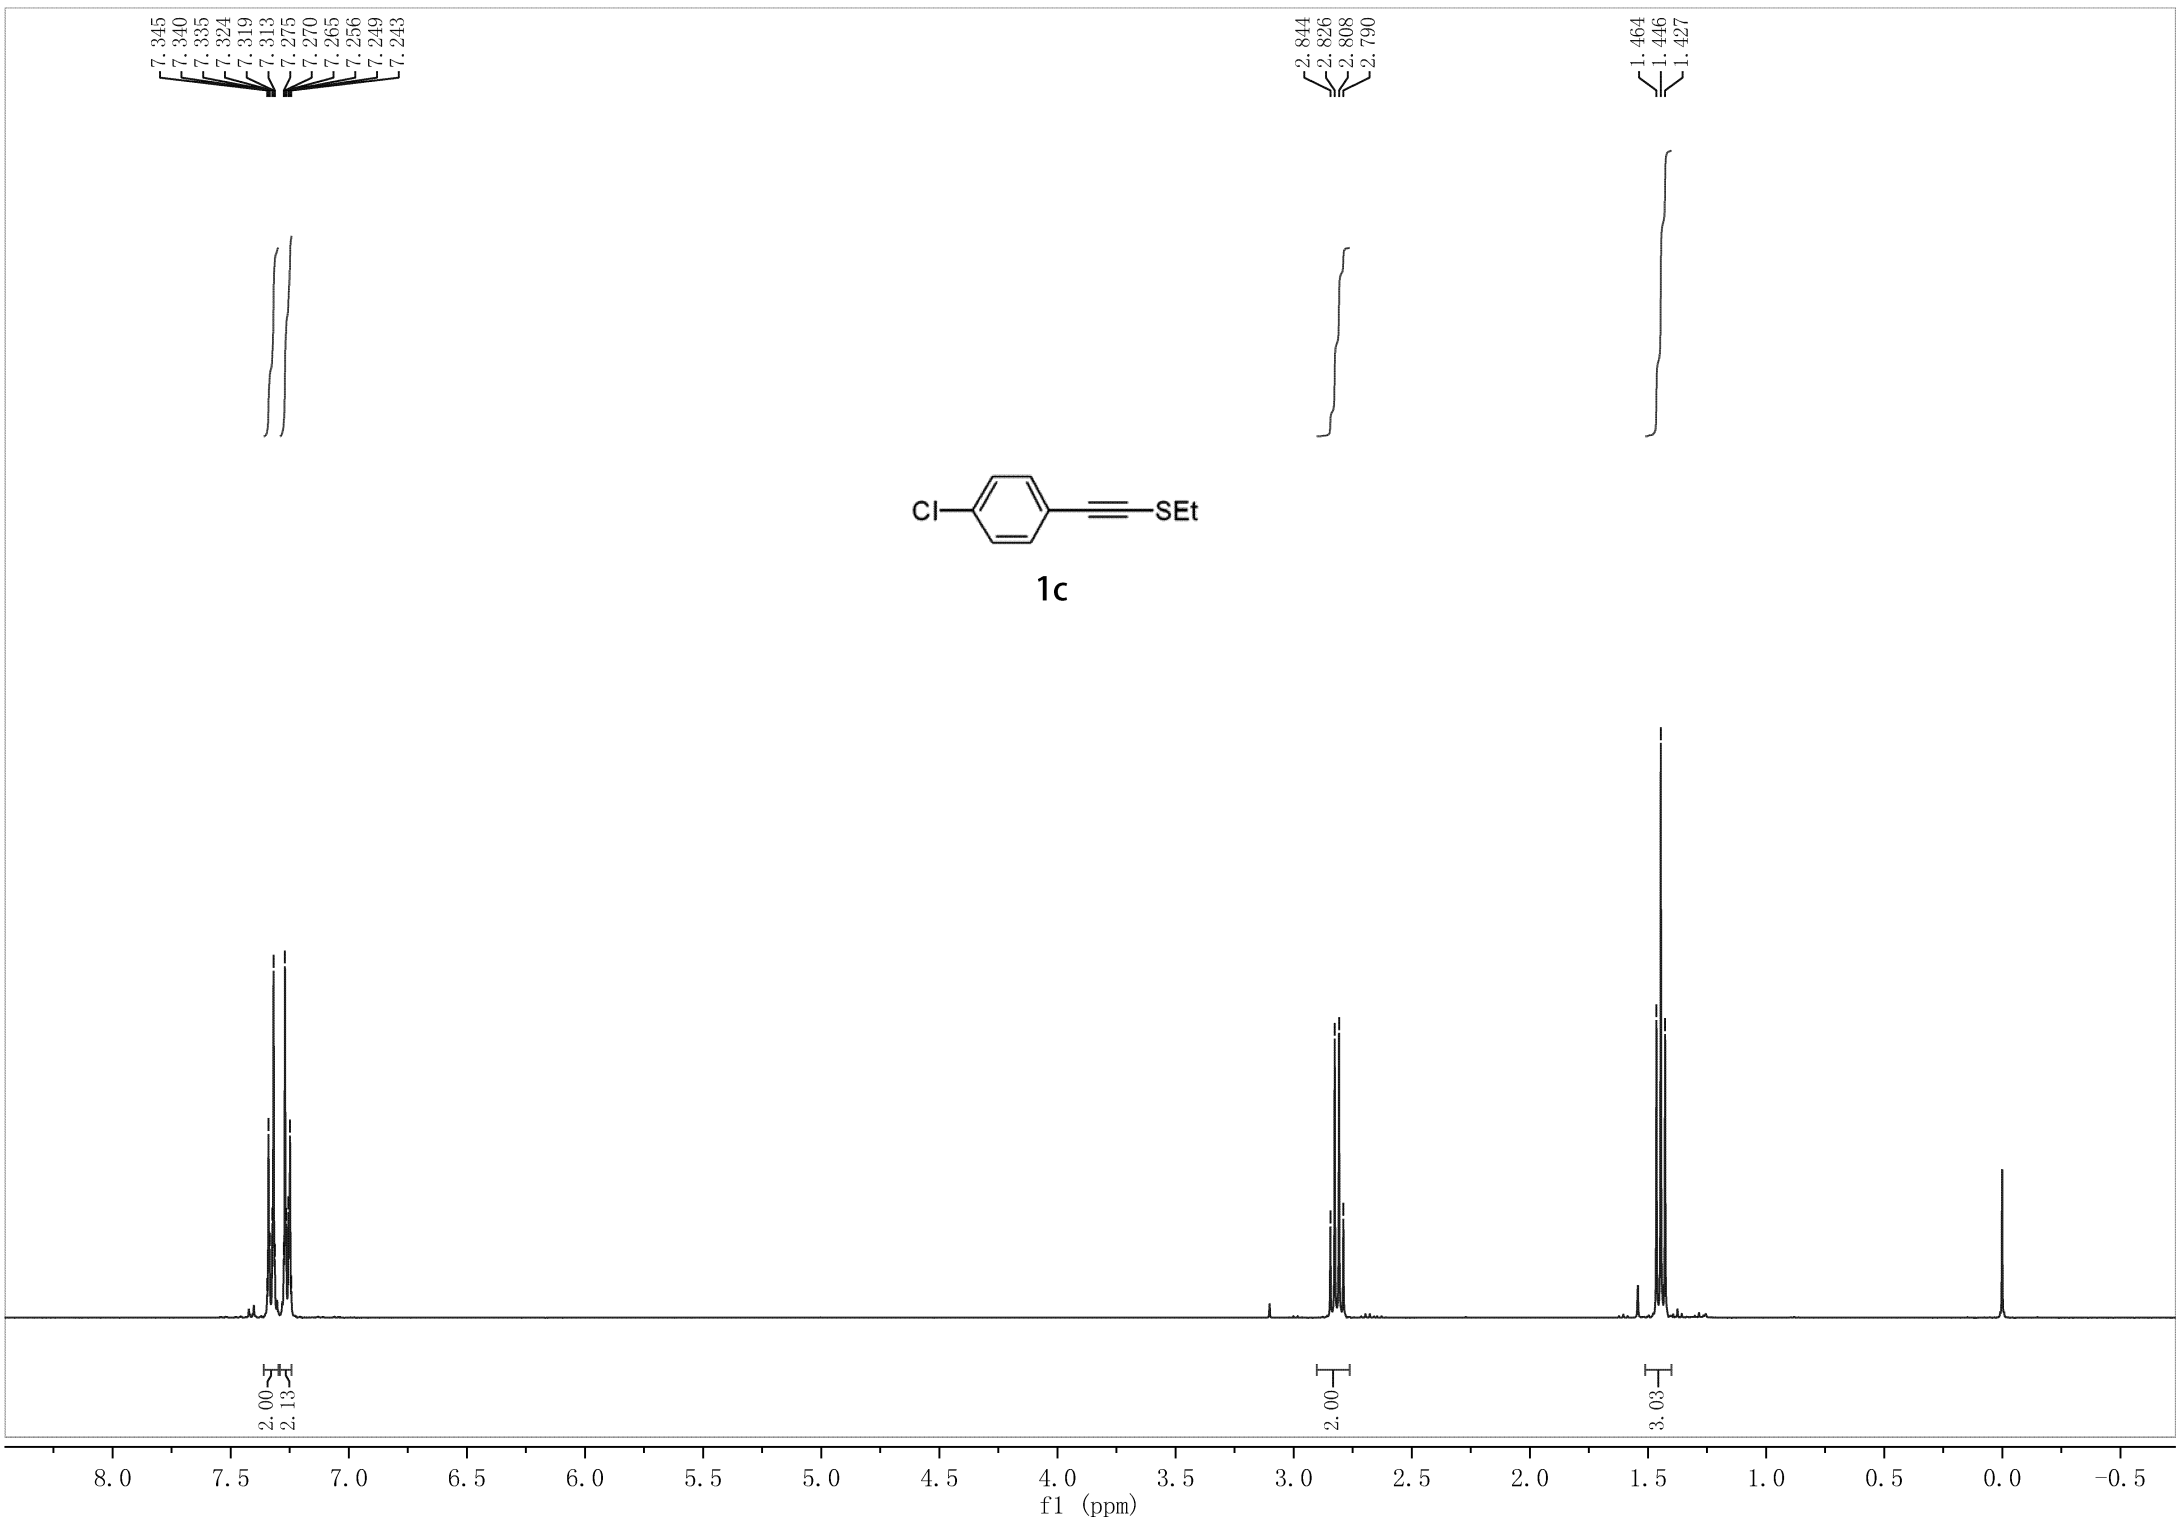

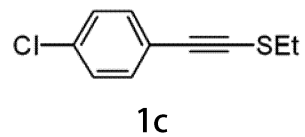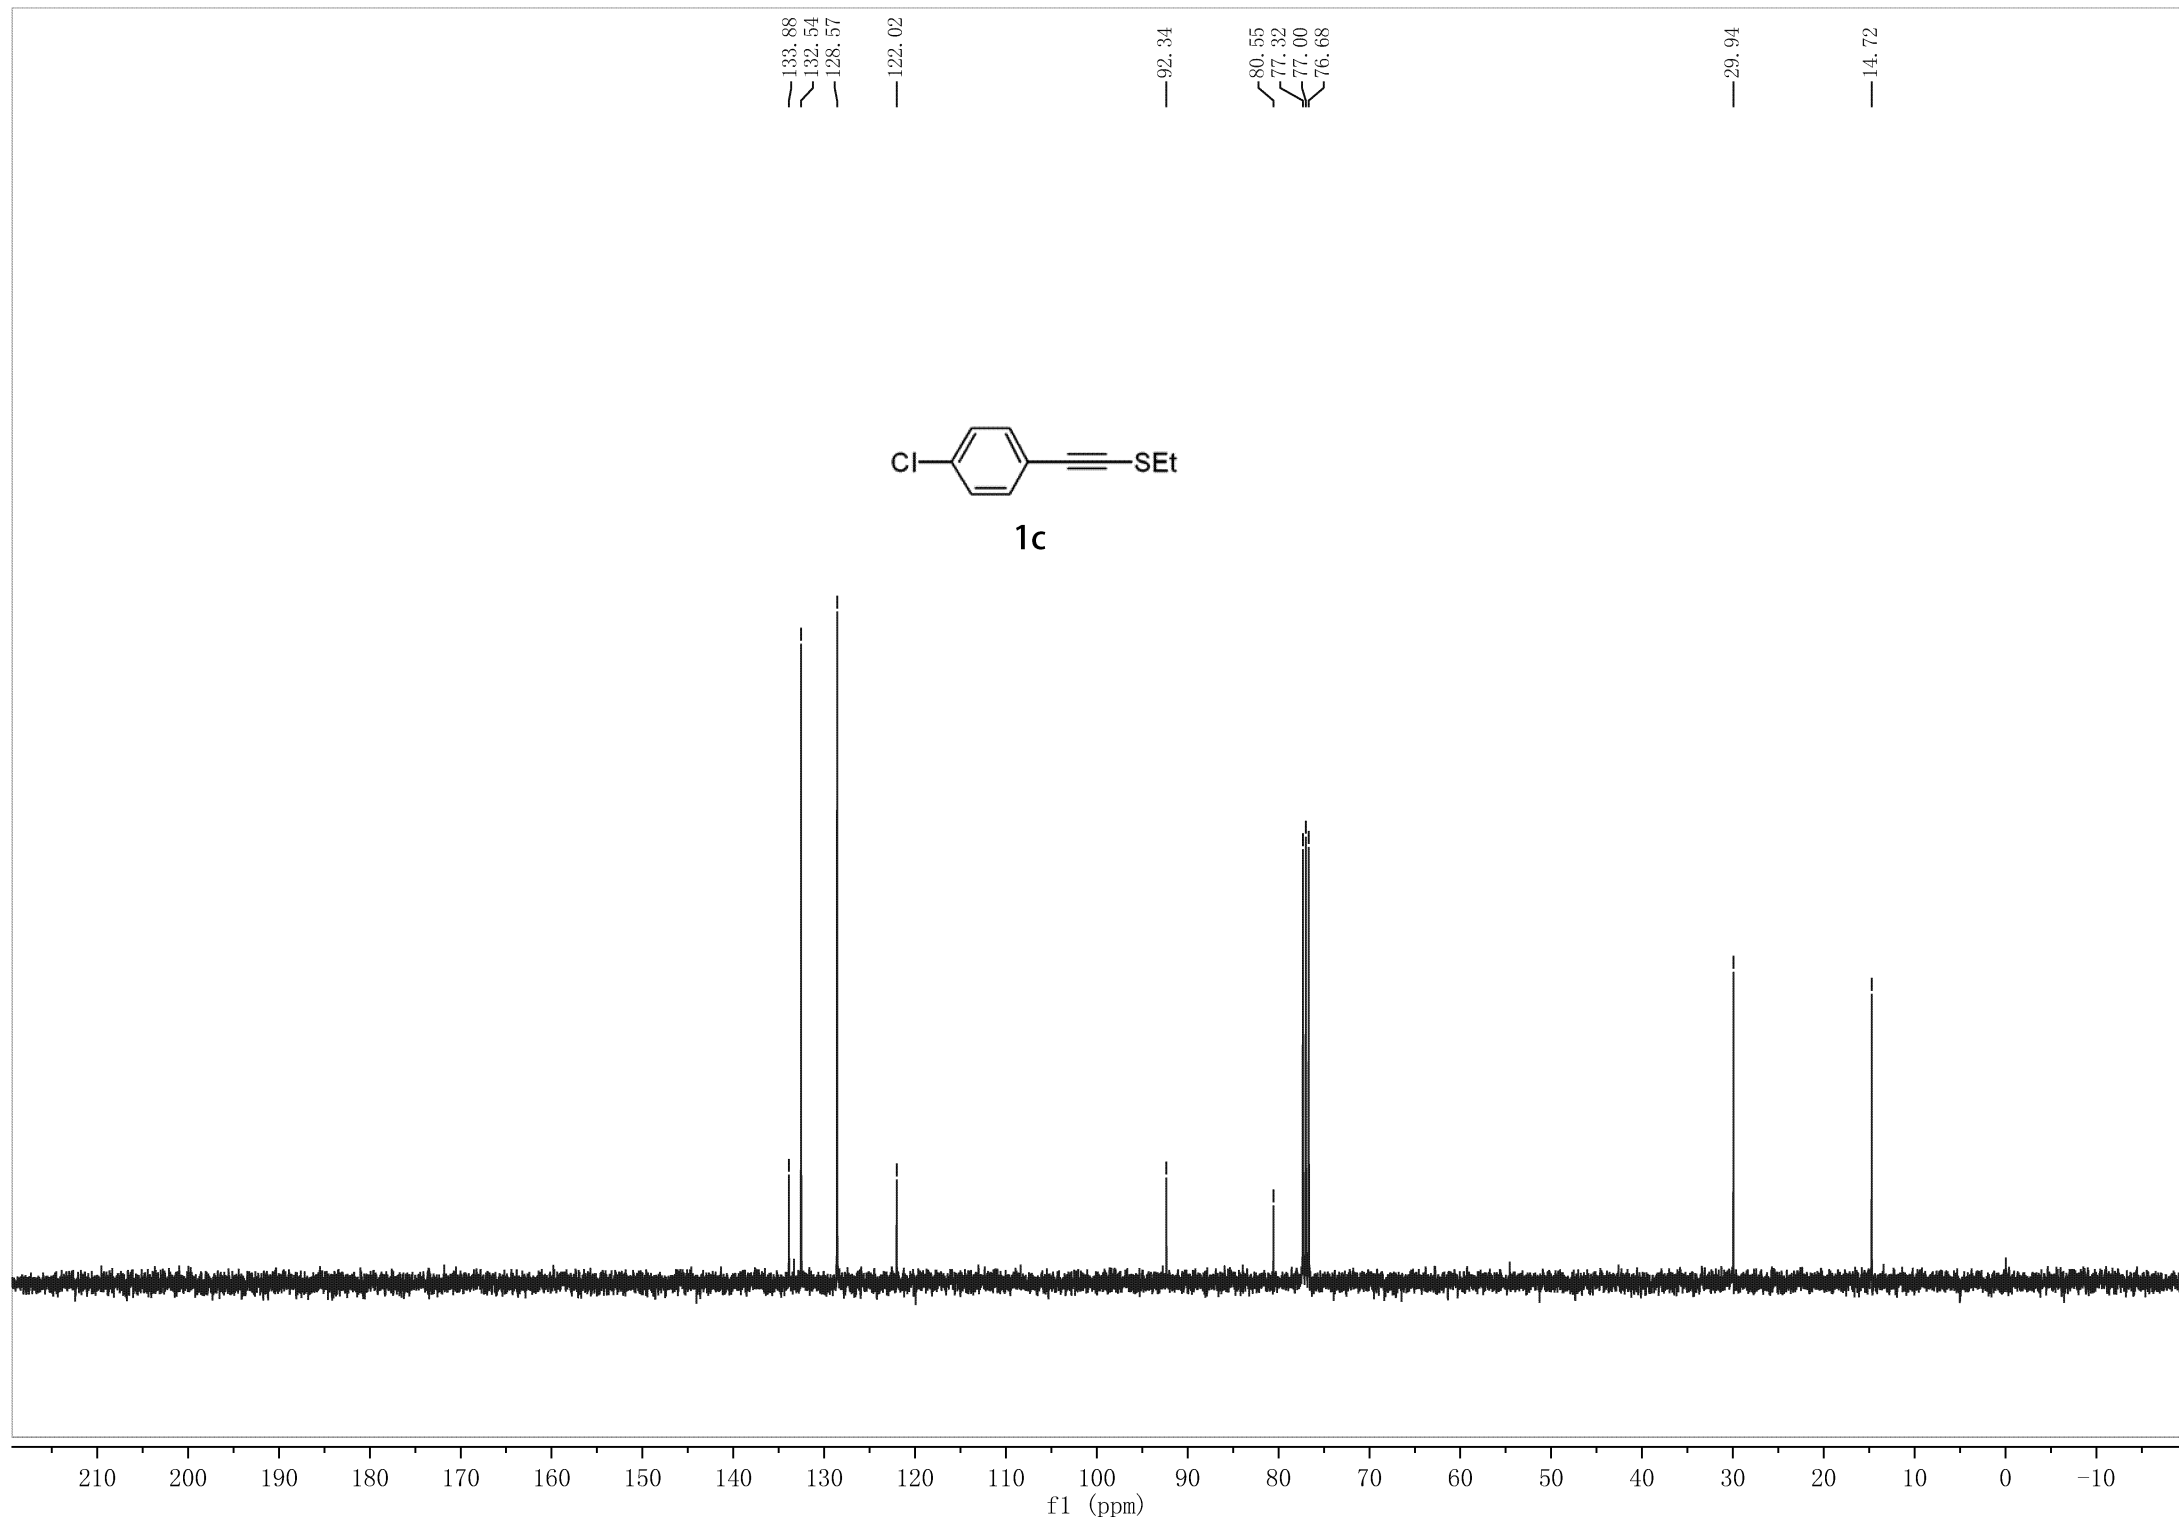

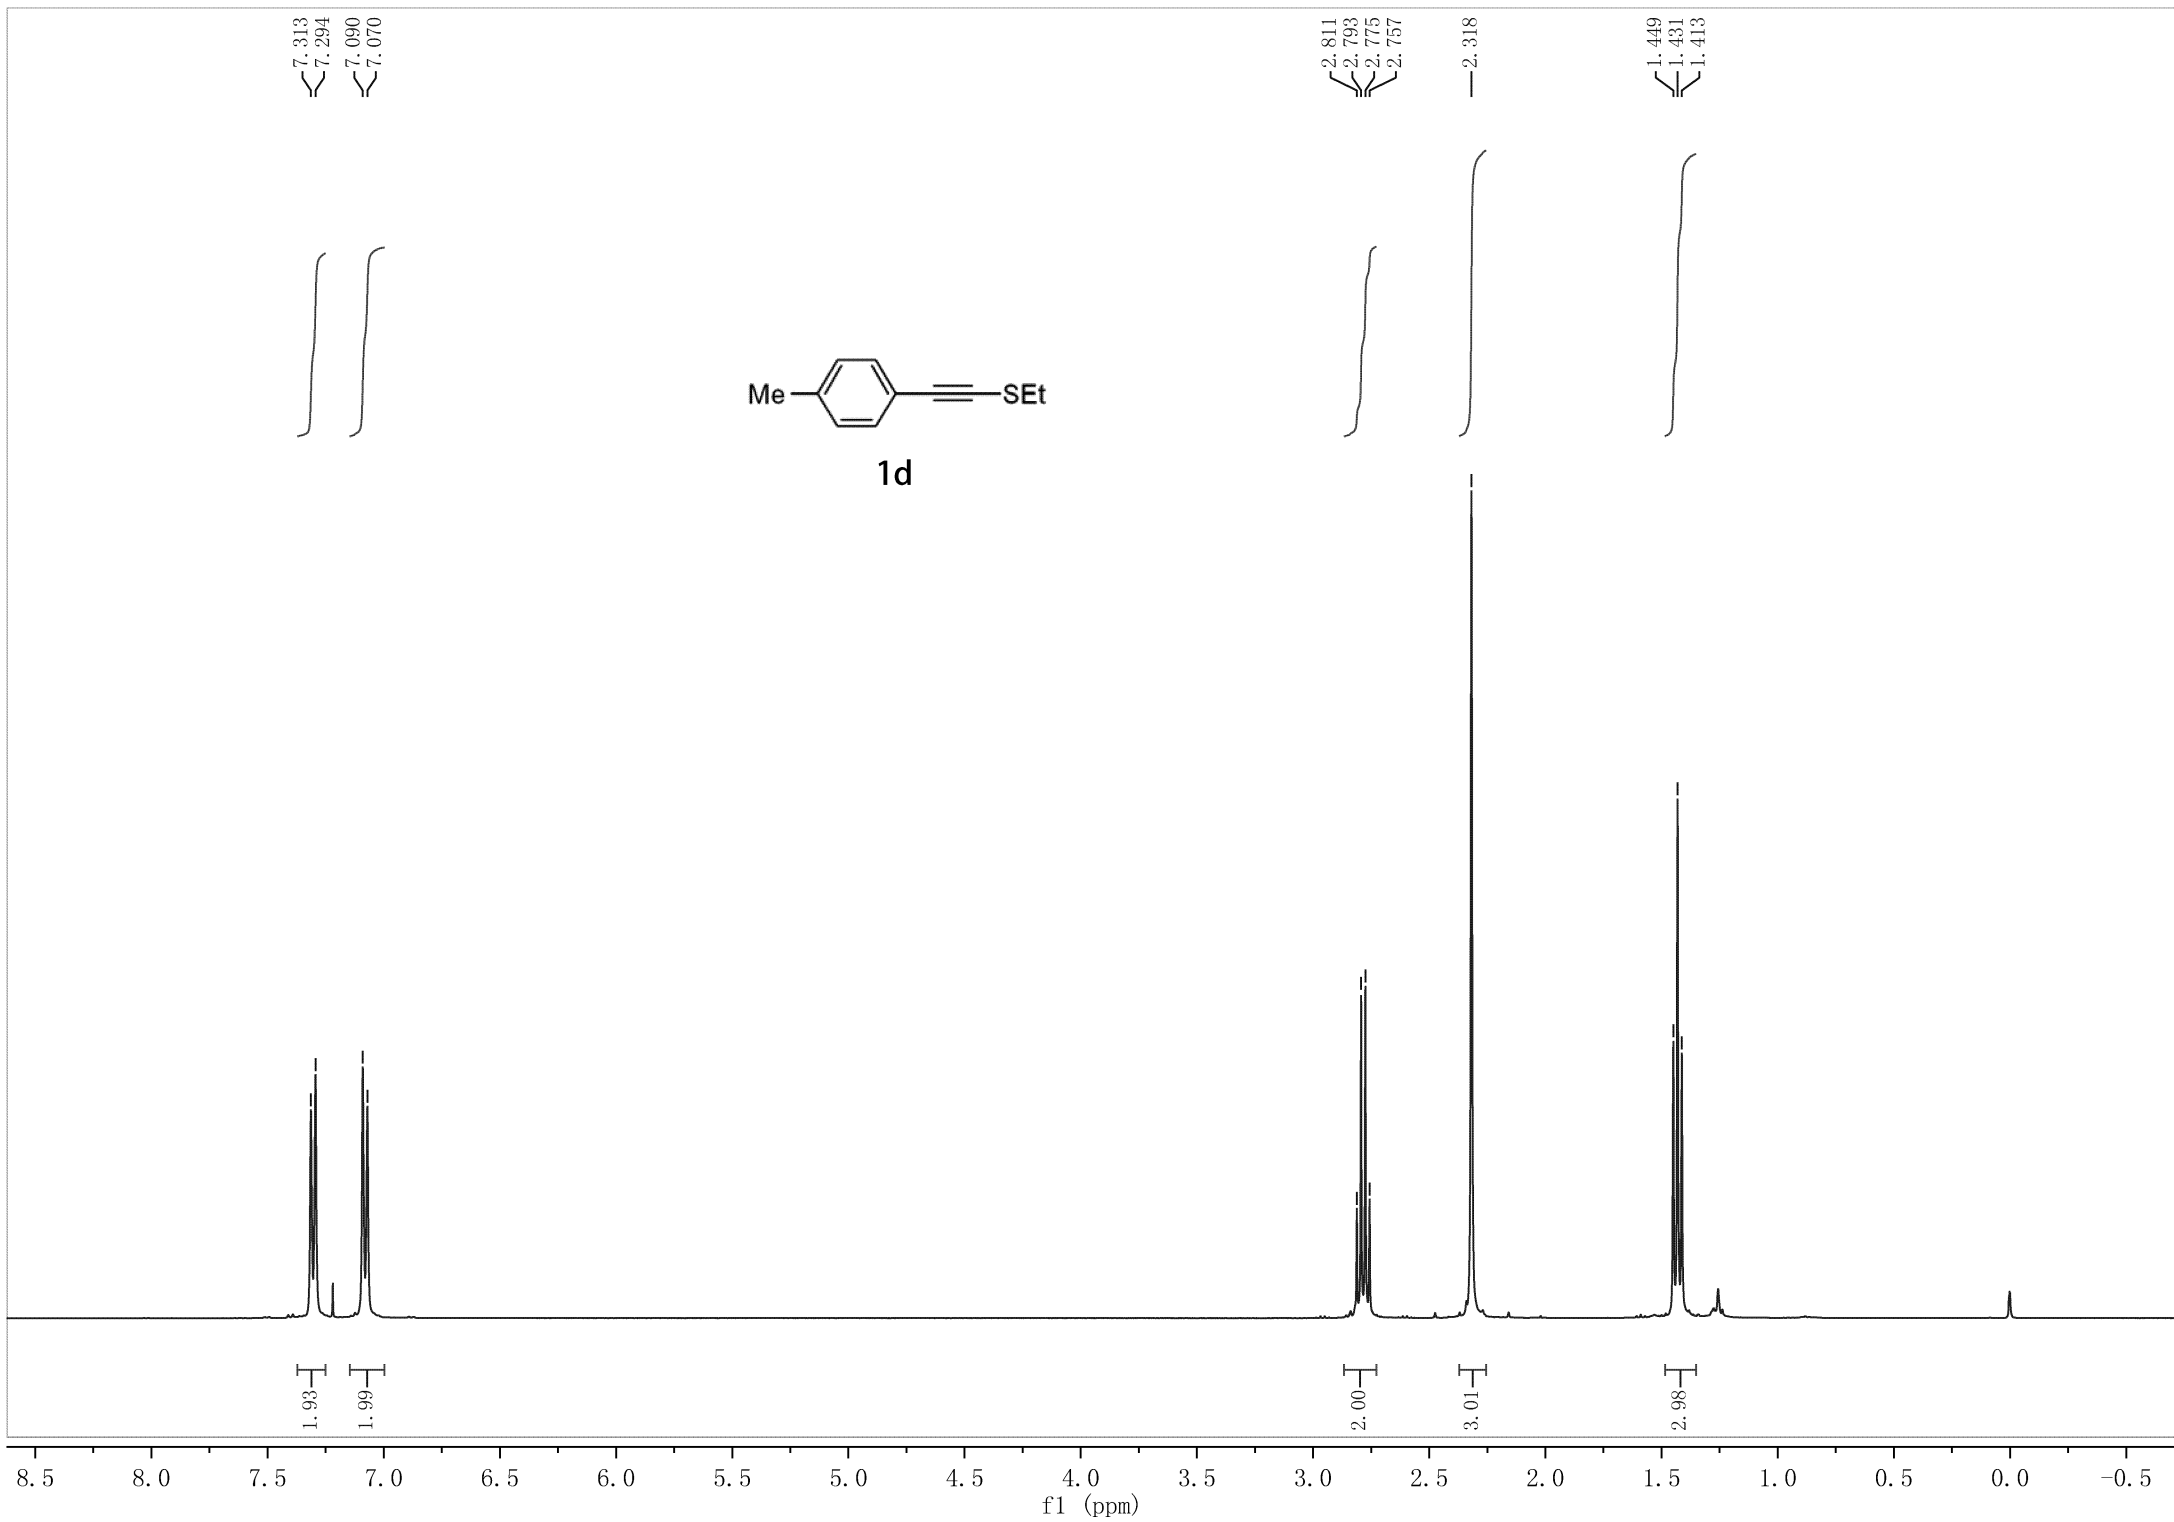

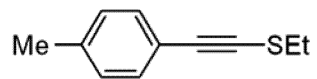

1d

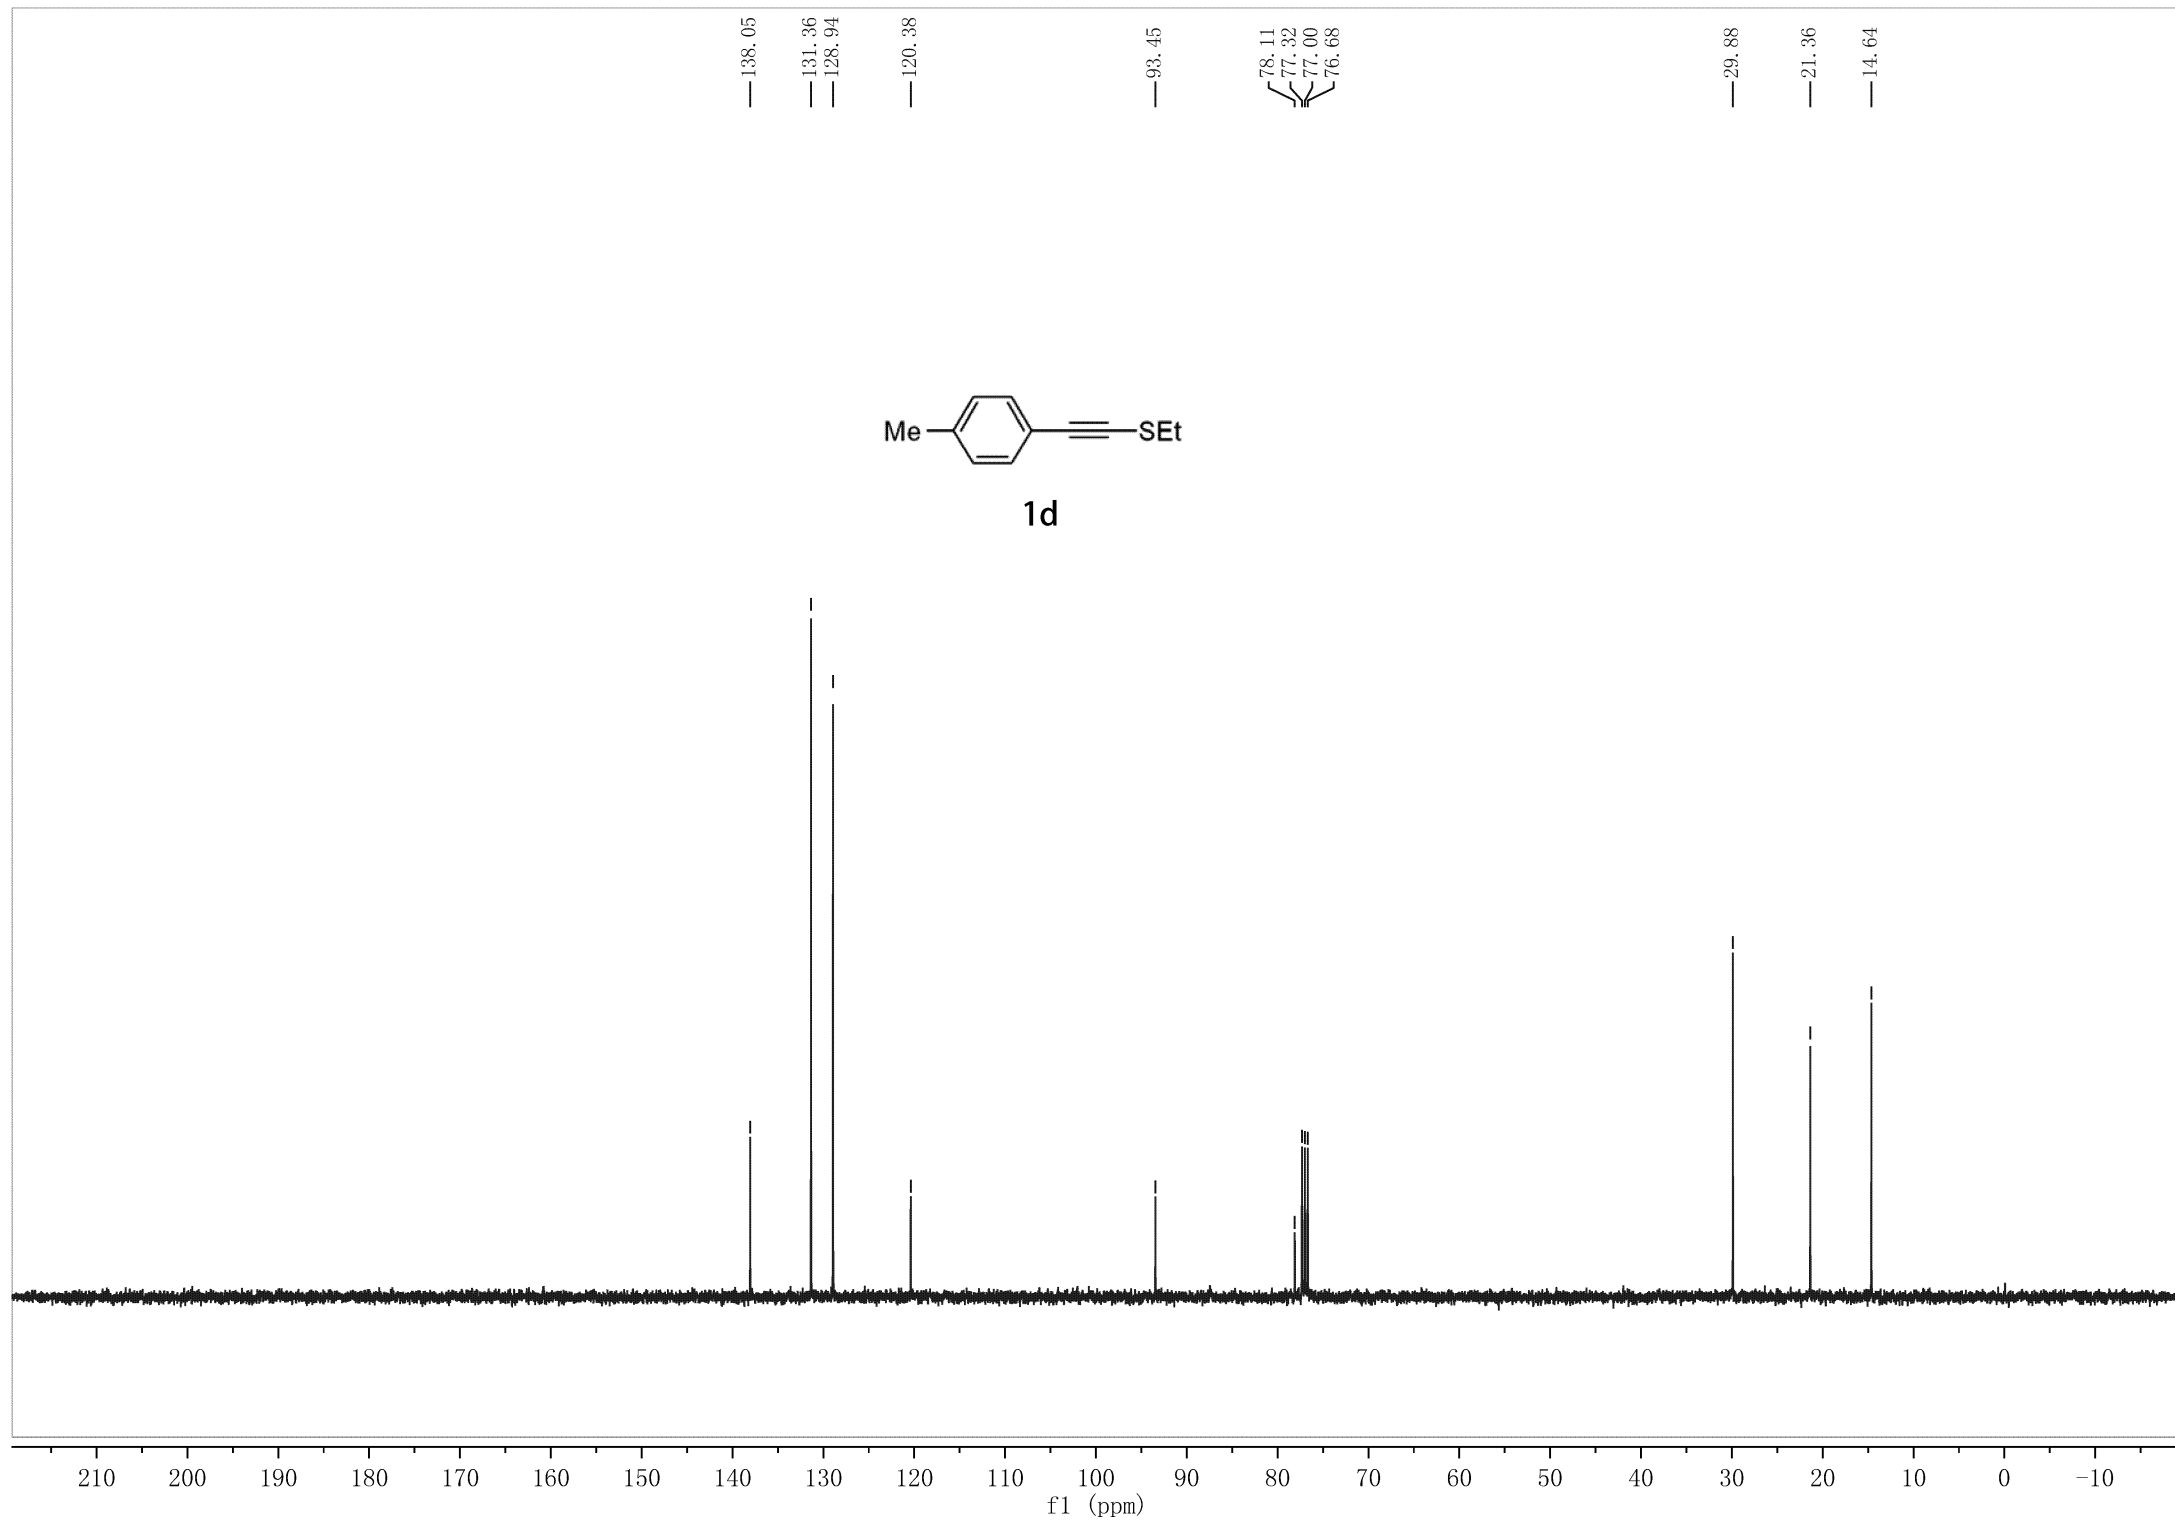

7.233  
7.217  
7.205  
7.189  
7.162  
7.160  
7.145  
7.143  
7.085  
7.080  
7.061  
7.059  
6.973  
6.968  
6.956  
6.951  
6.939  
6.932

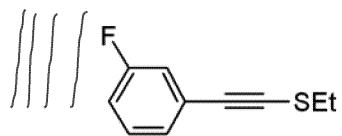

1e

2.810  
2.796  
2.781  
2.766

1.441  
1.426  
1.411

0.000

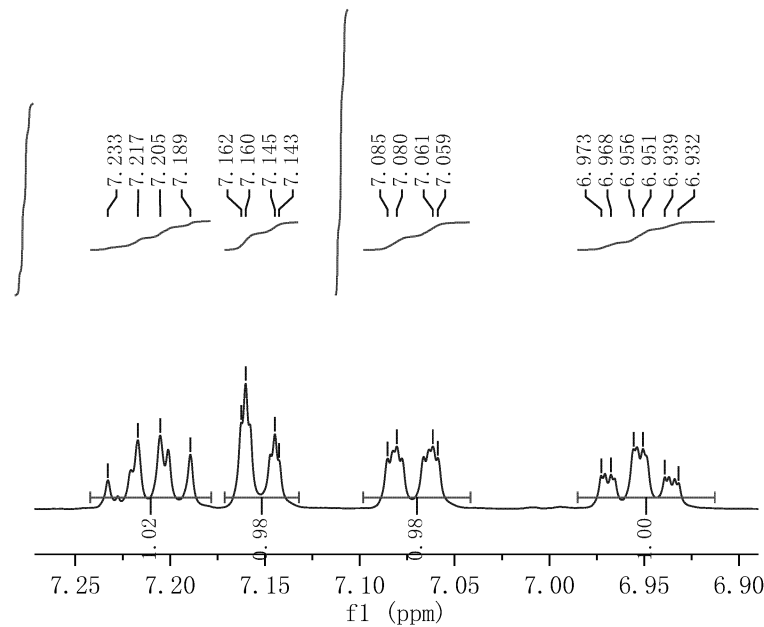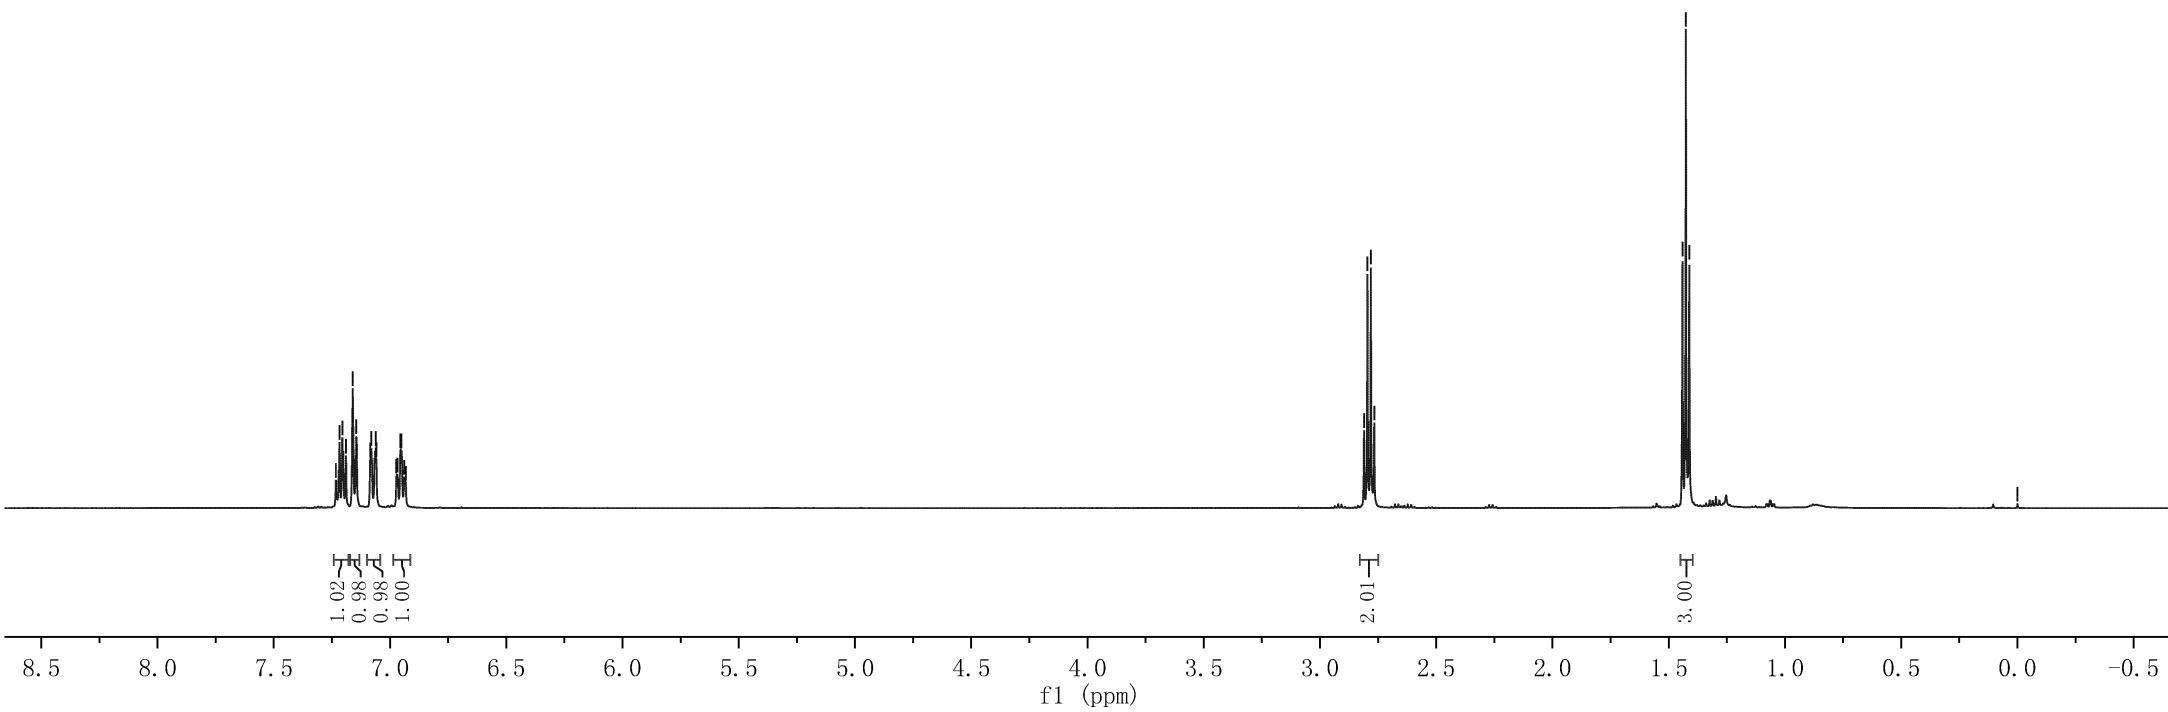



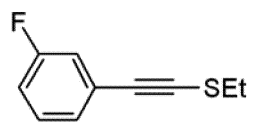

1e

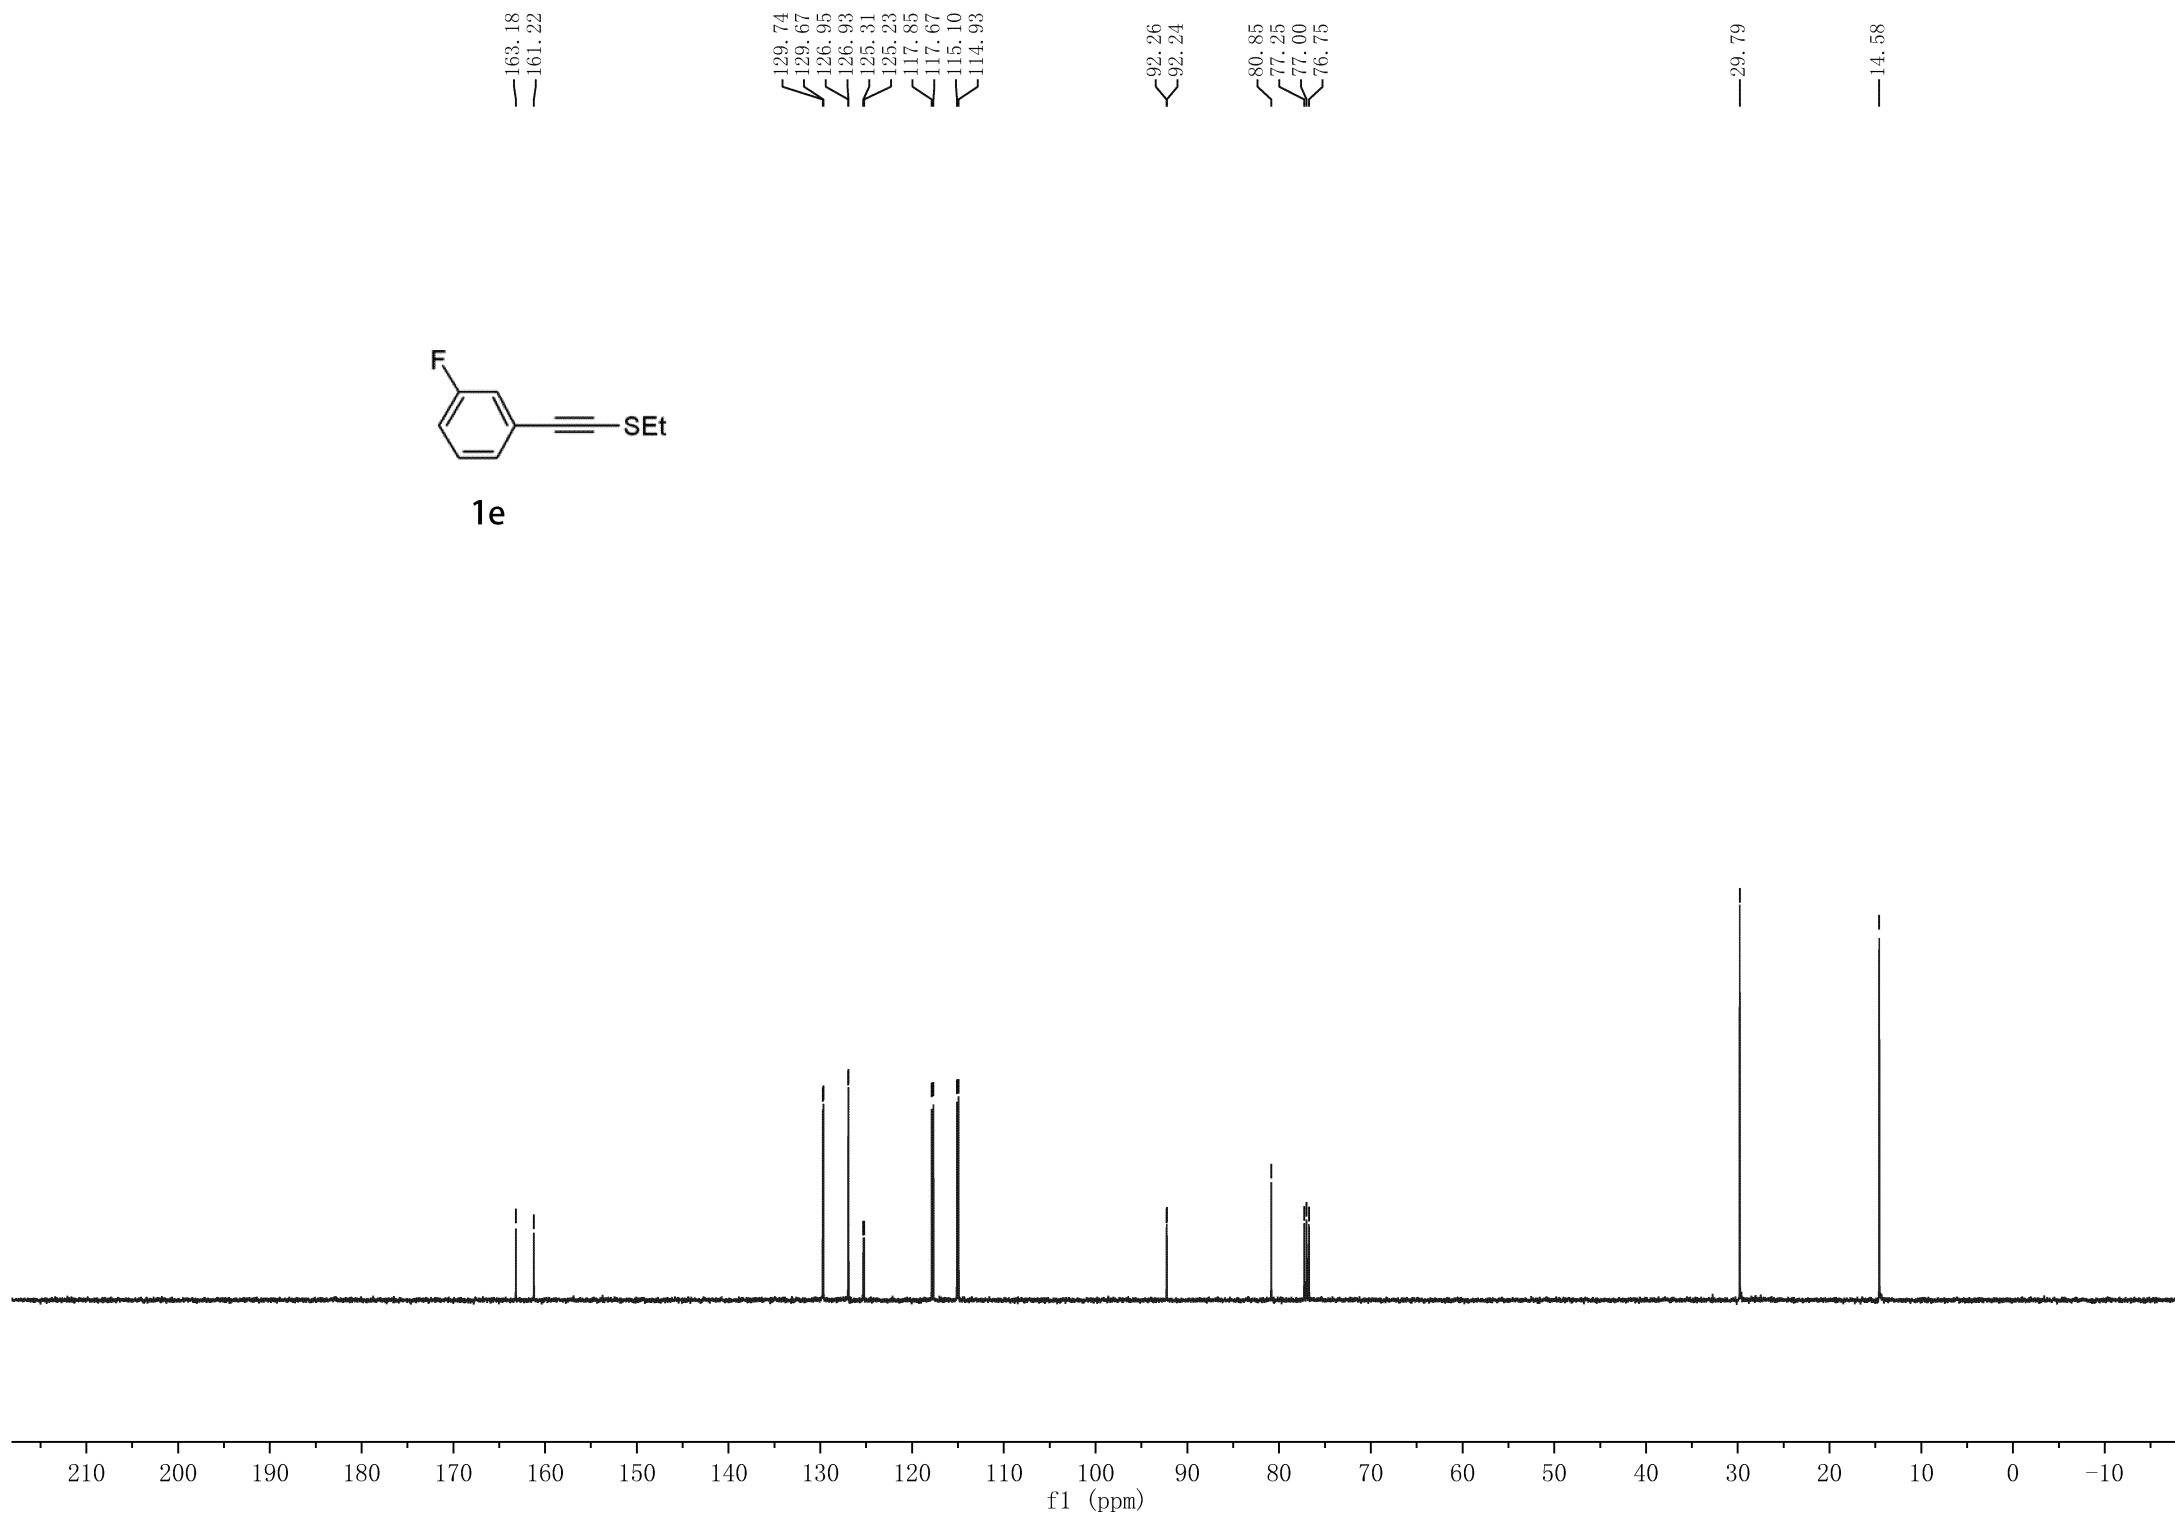

7.241  
7.213  
7.191  
7.177  
7.158  
7.143  
7.128  
7.088  
7.064  
7.049  
7.002

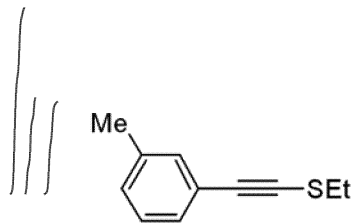

1f

2.786  
2.771  
2.756  
2.742

2.278

1.434  
1.420  
1.405

0.000

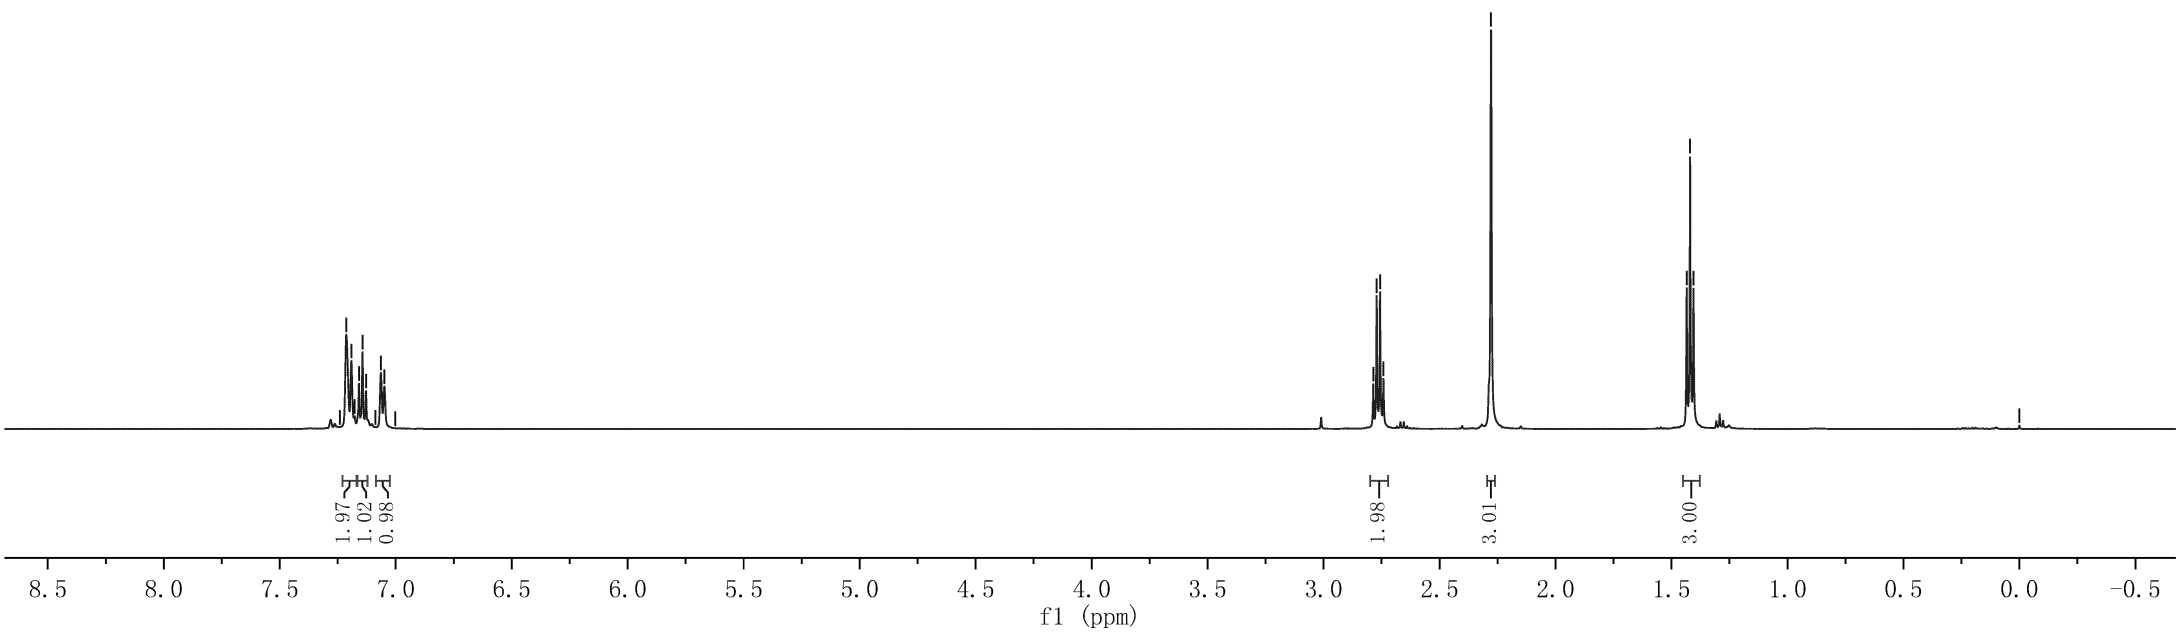

1.97  
1.02  
0.98

1.98

3.01

3.00

8.5 8.0 7.5 7.0 6.5 6.0 5.5 5.0 4.5 4.0 3.5 3.0 2.5 2.0 1.5 1.0 0.5 0.0 -0.5

f1 (ppm)

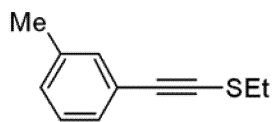

1f

137.91  
131.97  
128.86  
128.46  
128.14  
123.33

93.64

78.71  
77.25  
77.00  
76.75

29.96

21.17

14.70

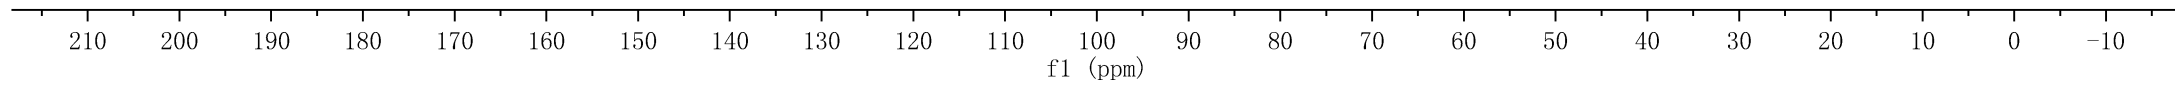

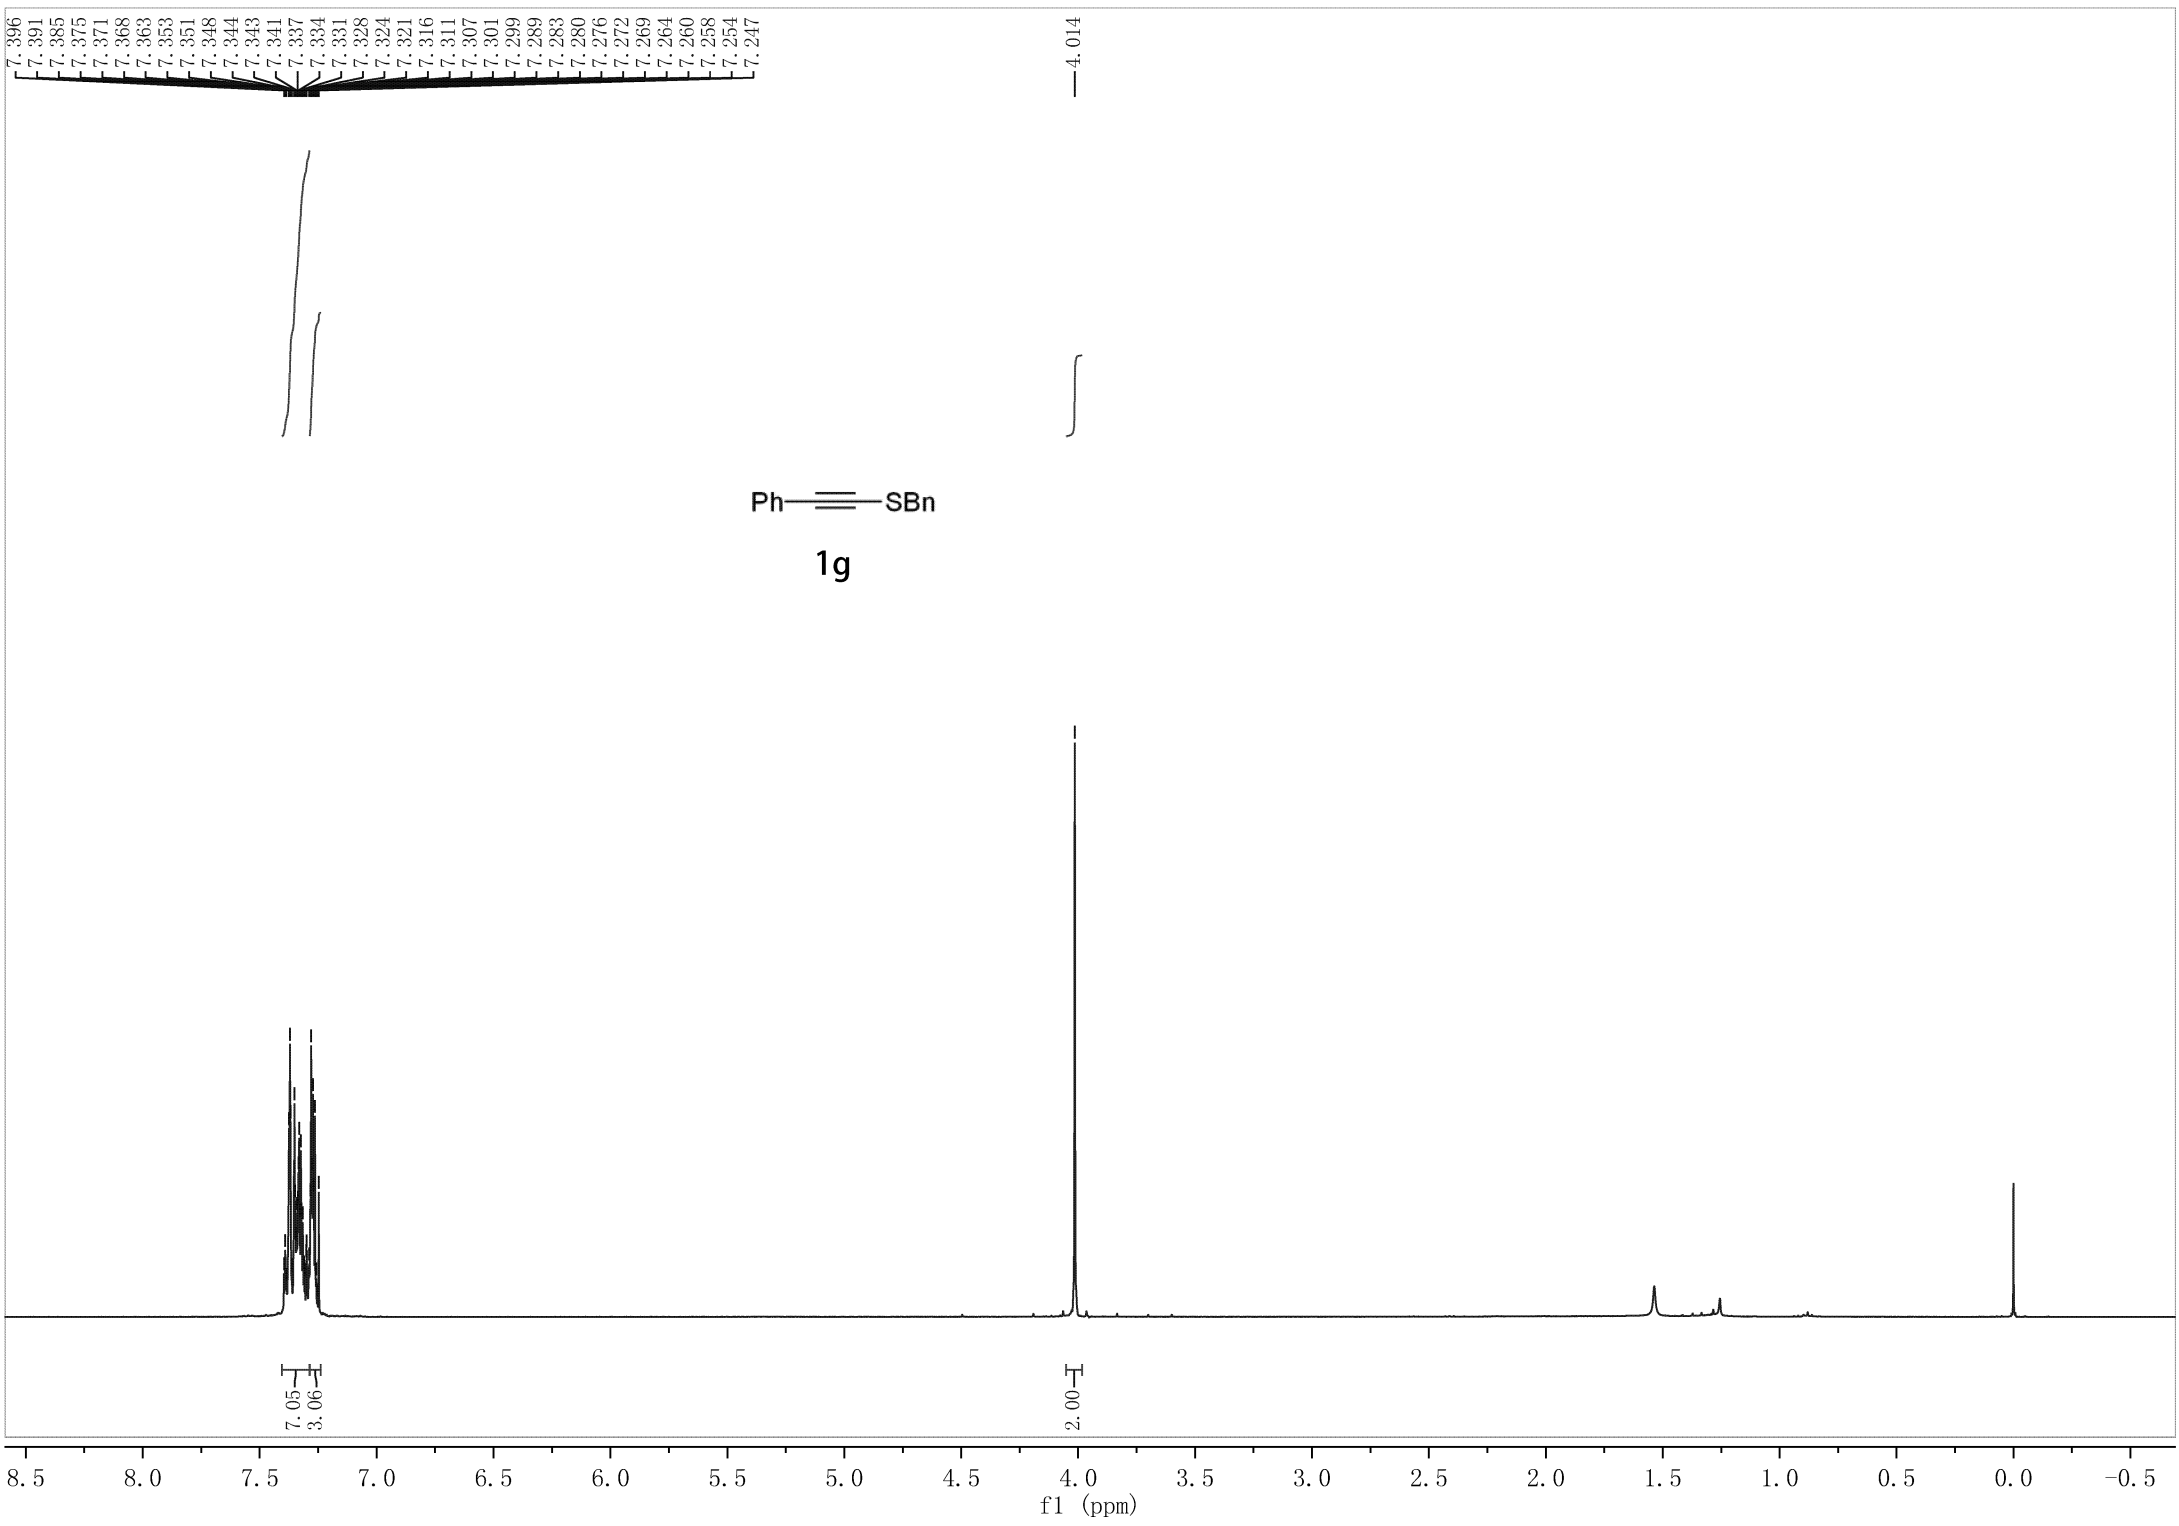

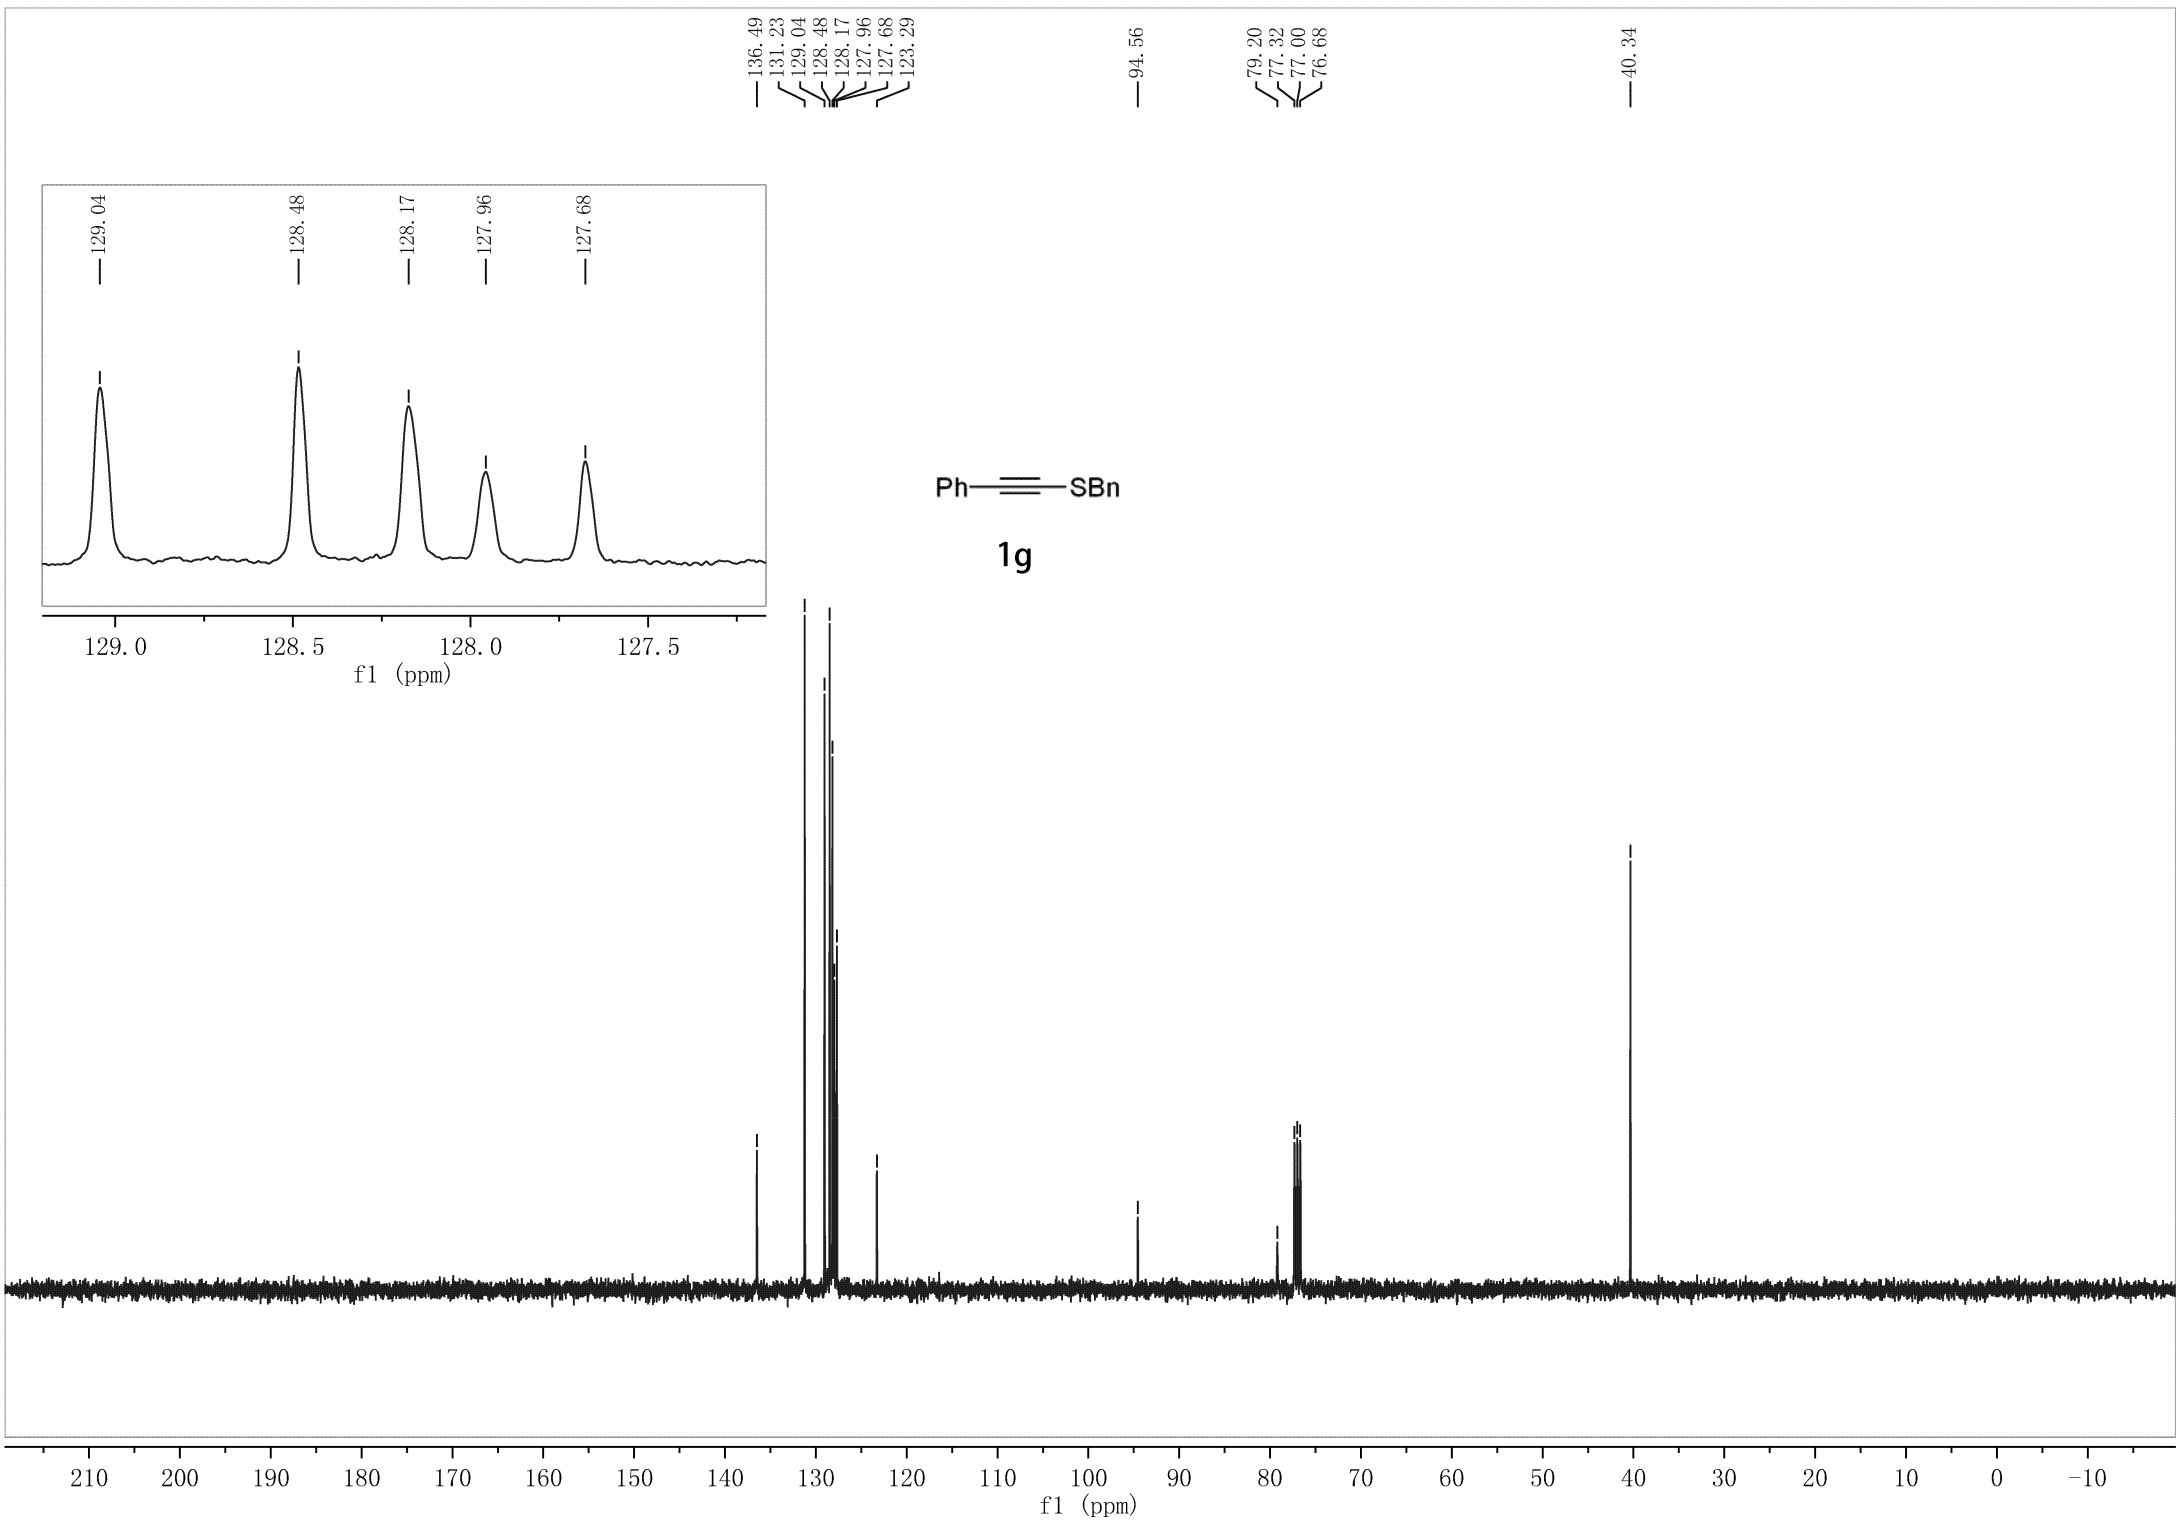

7.546  
7.525  
7.484  
7.464

2.868  
2.850  
2.832  
2.813

1.478  
1.460  
1.442

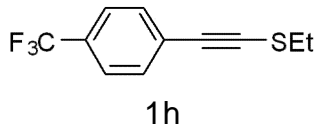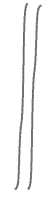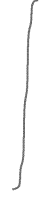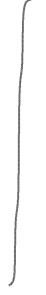

1.97  
1.95

2.00

3.02

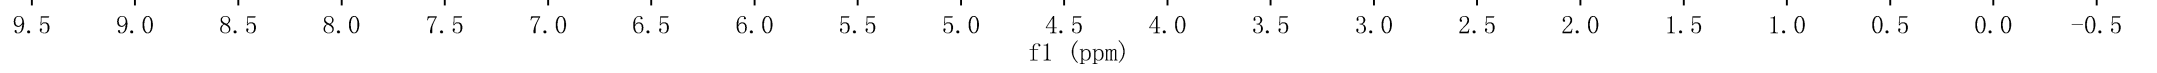

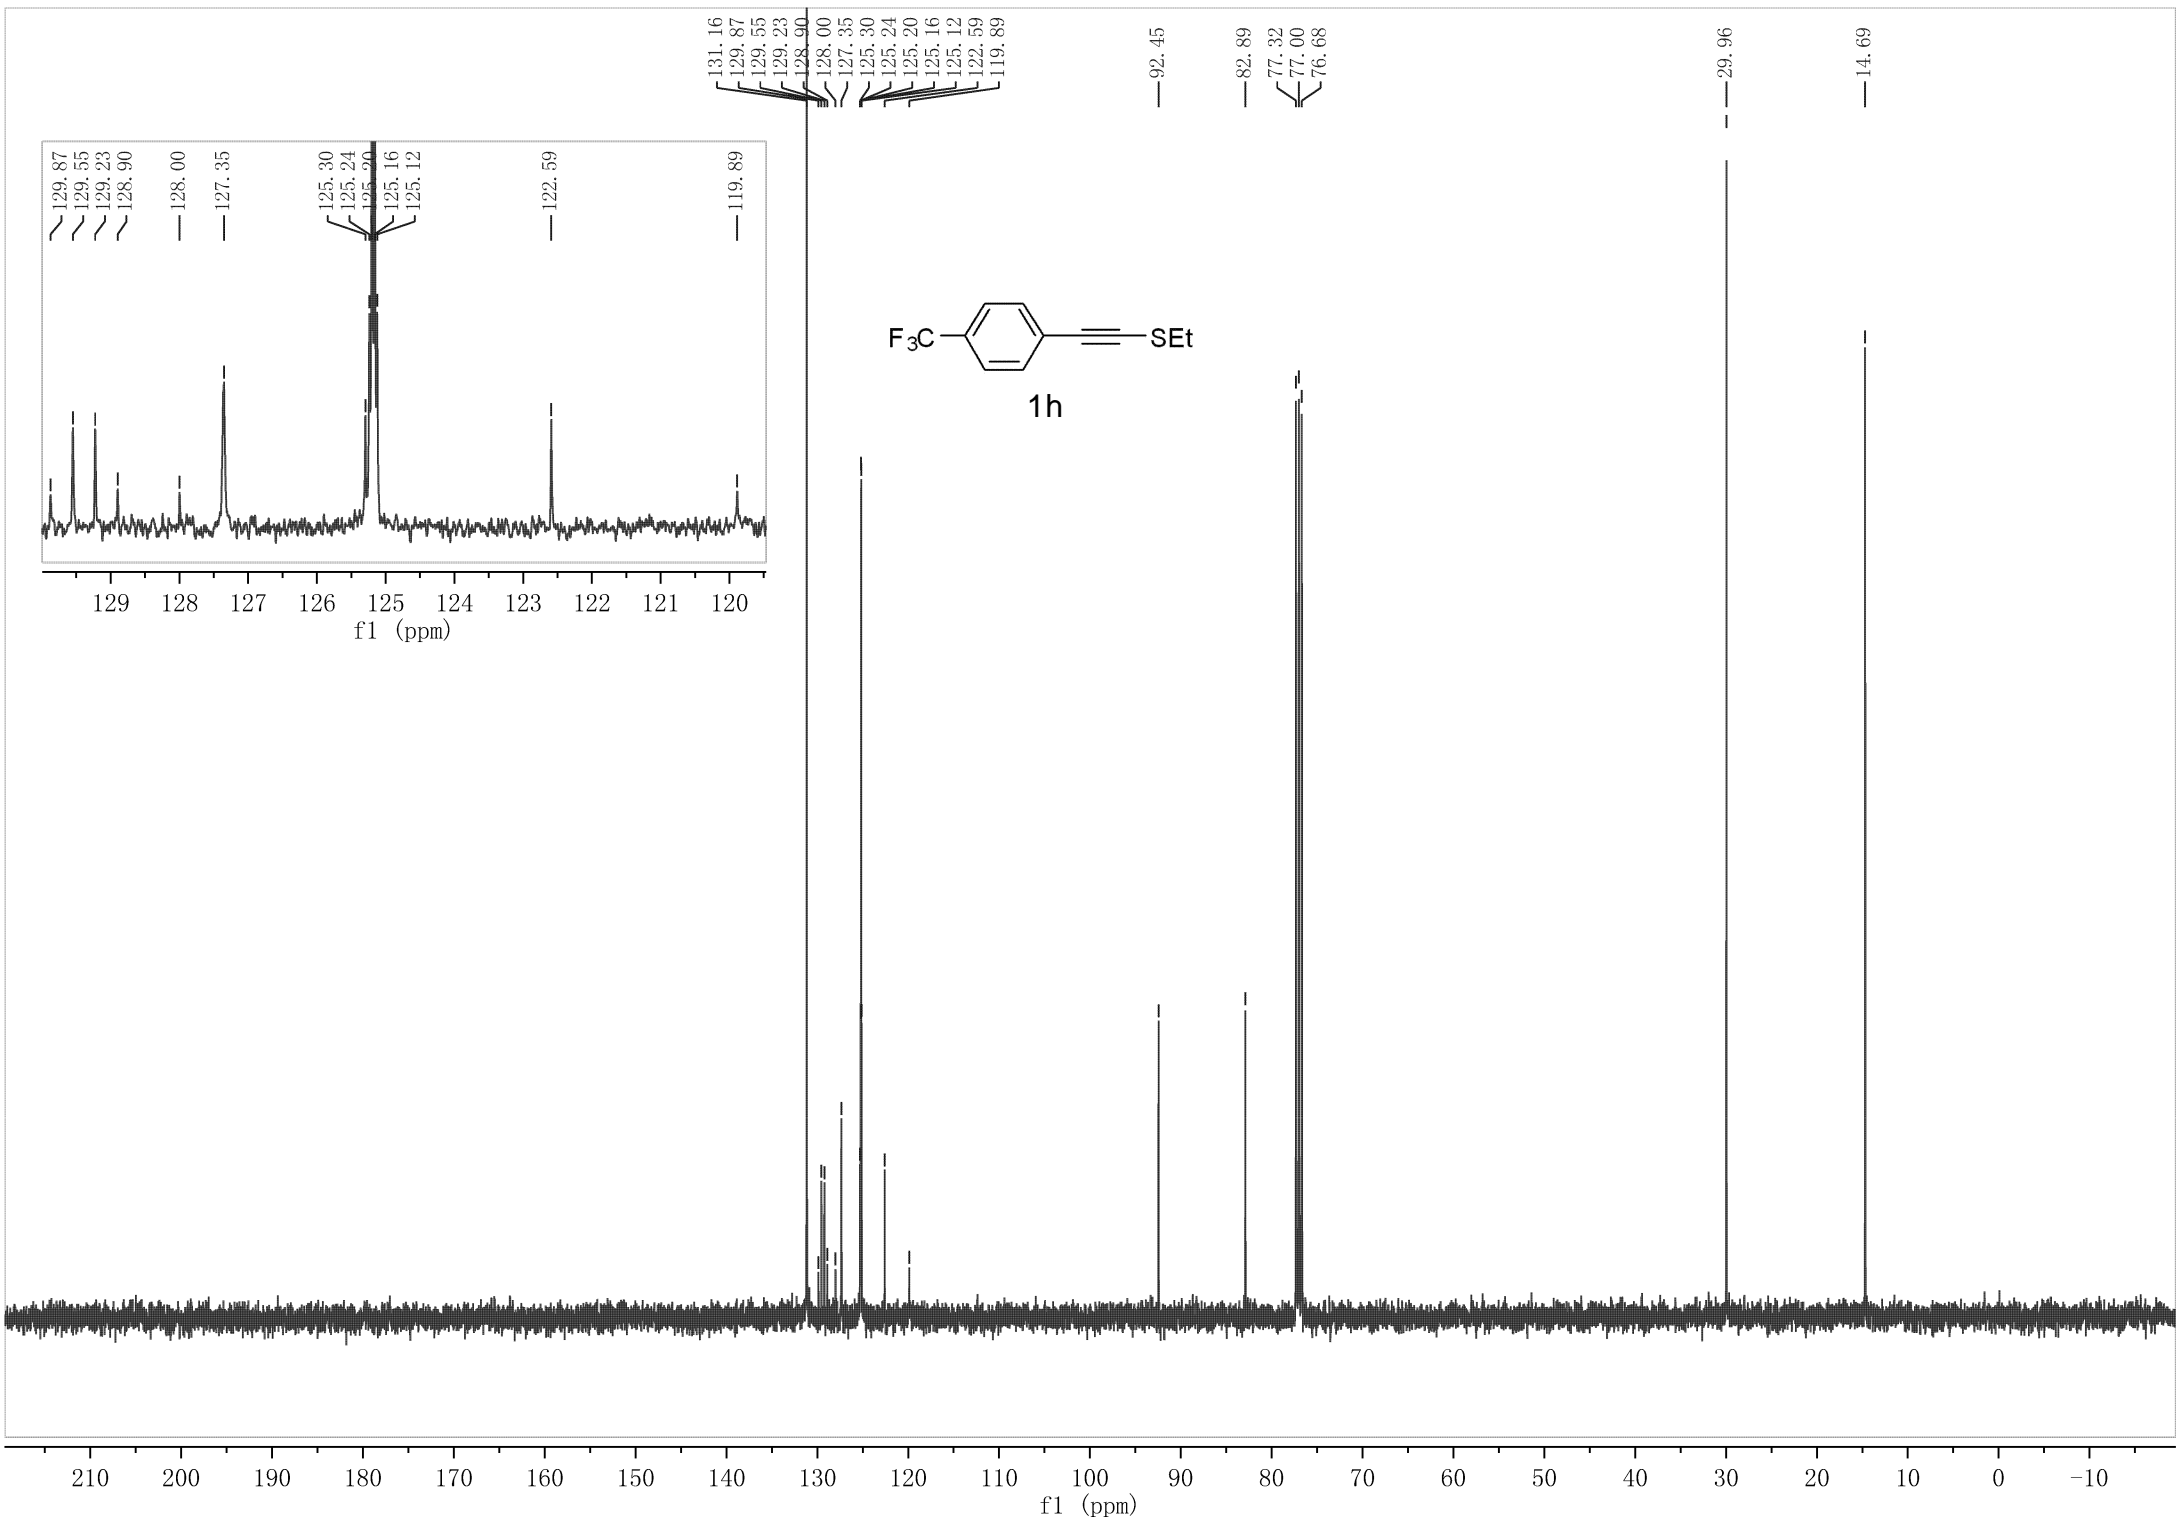

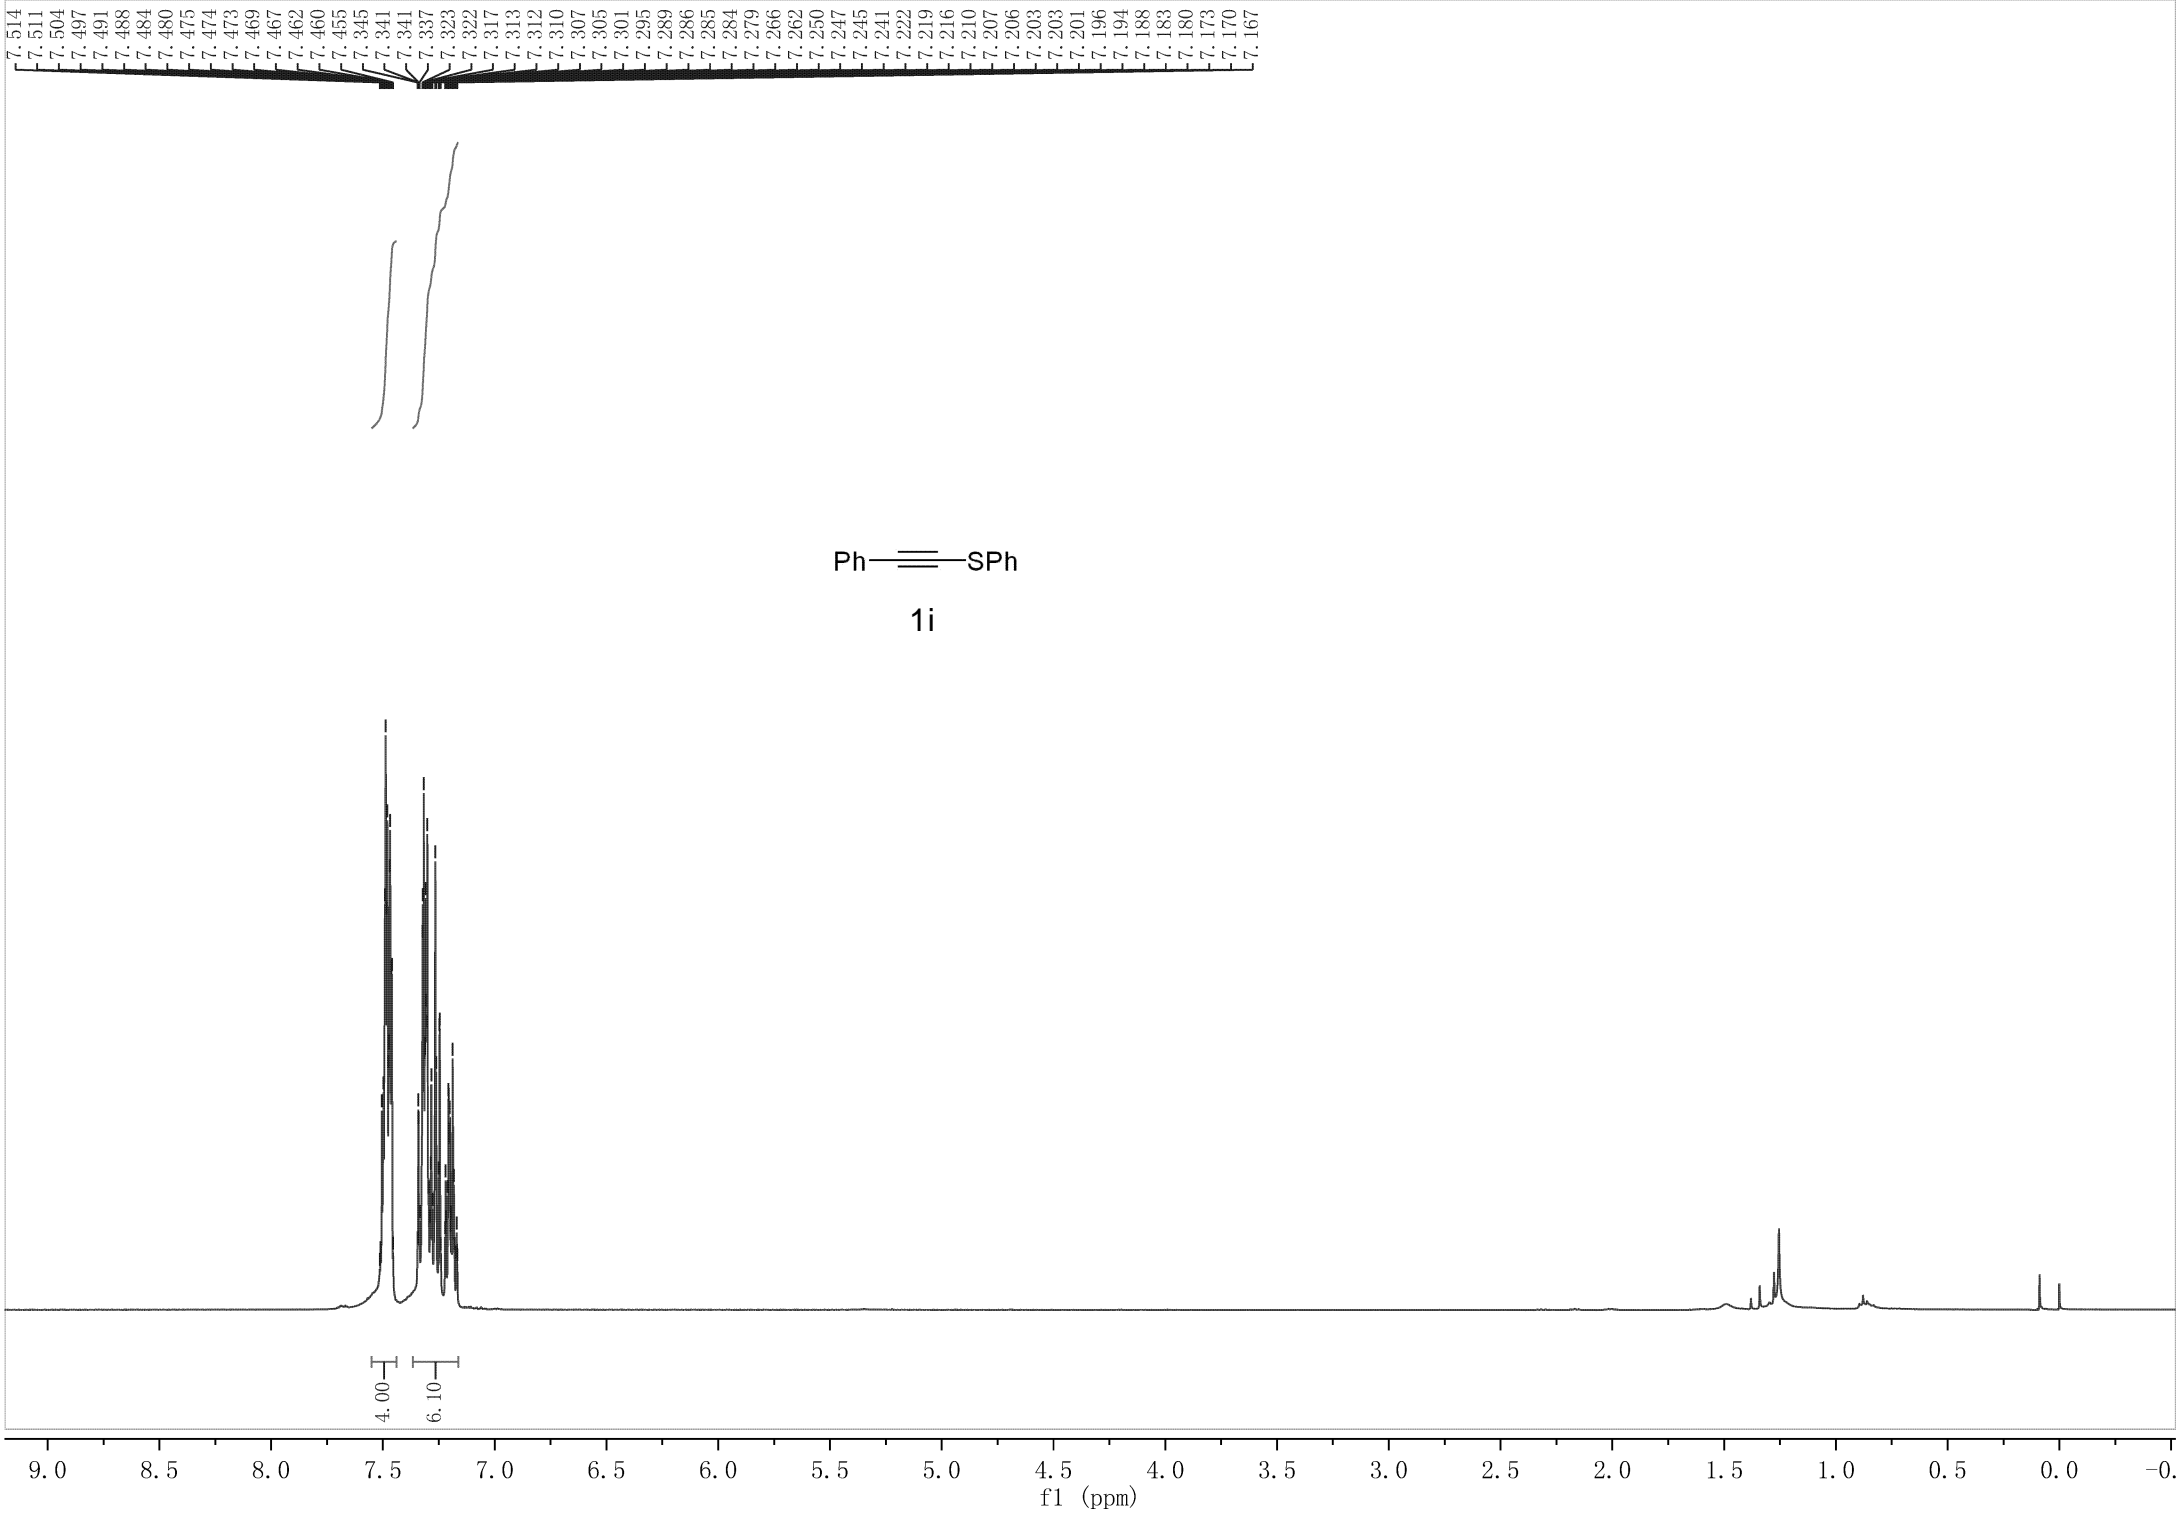



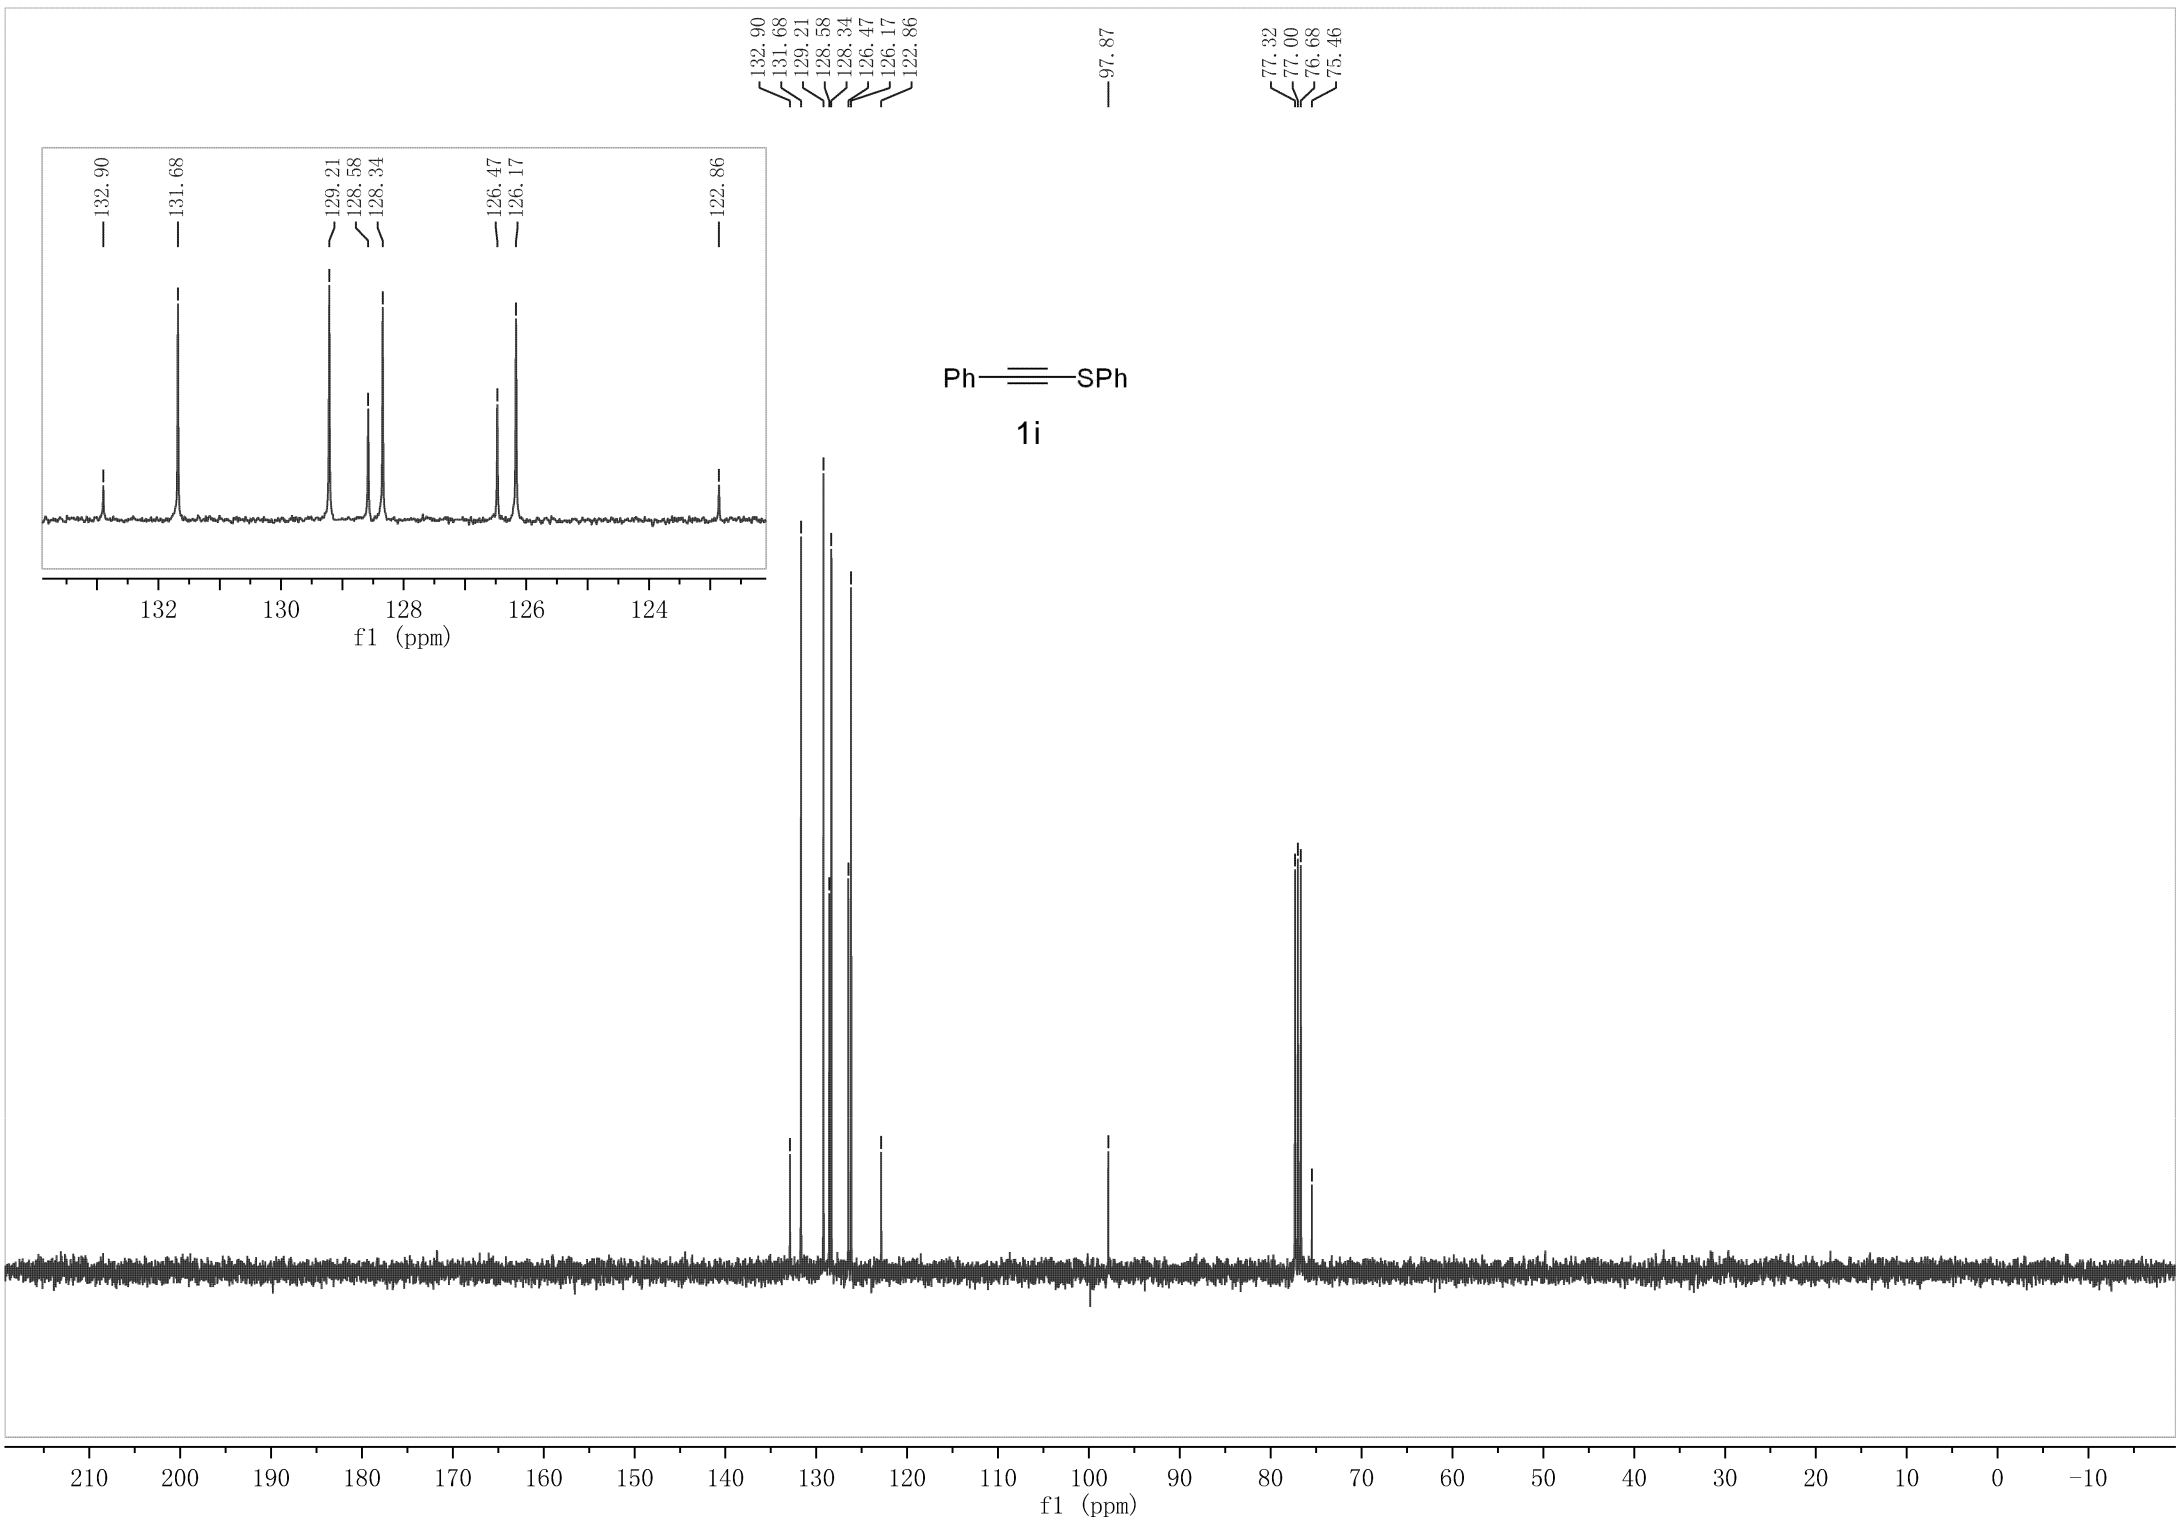

7.779  
7.679  
7.665  
7.413  
7.378  
7.363  
7.347

6.266

2.806  
2.791  
2.776

1.755  
1.740  
1.725  
1.695  
1.463  
1.433  
1.418  
1.389  
0.973  
0.959  
0.944

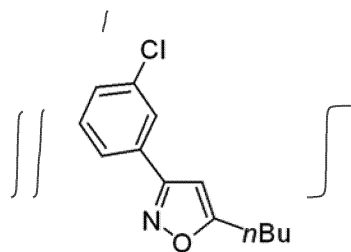

2h

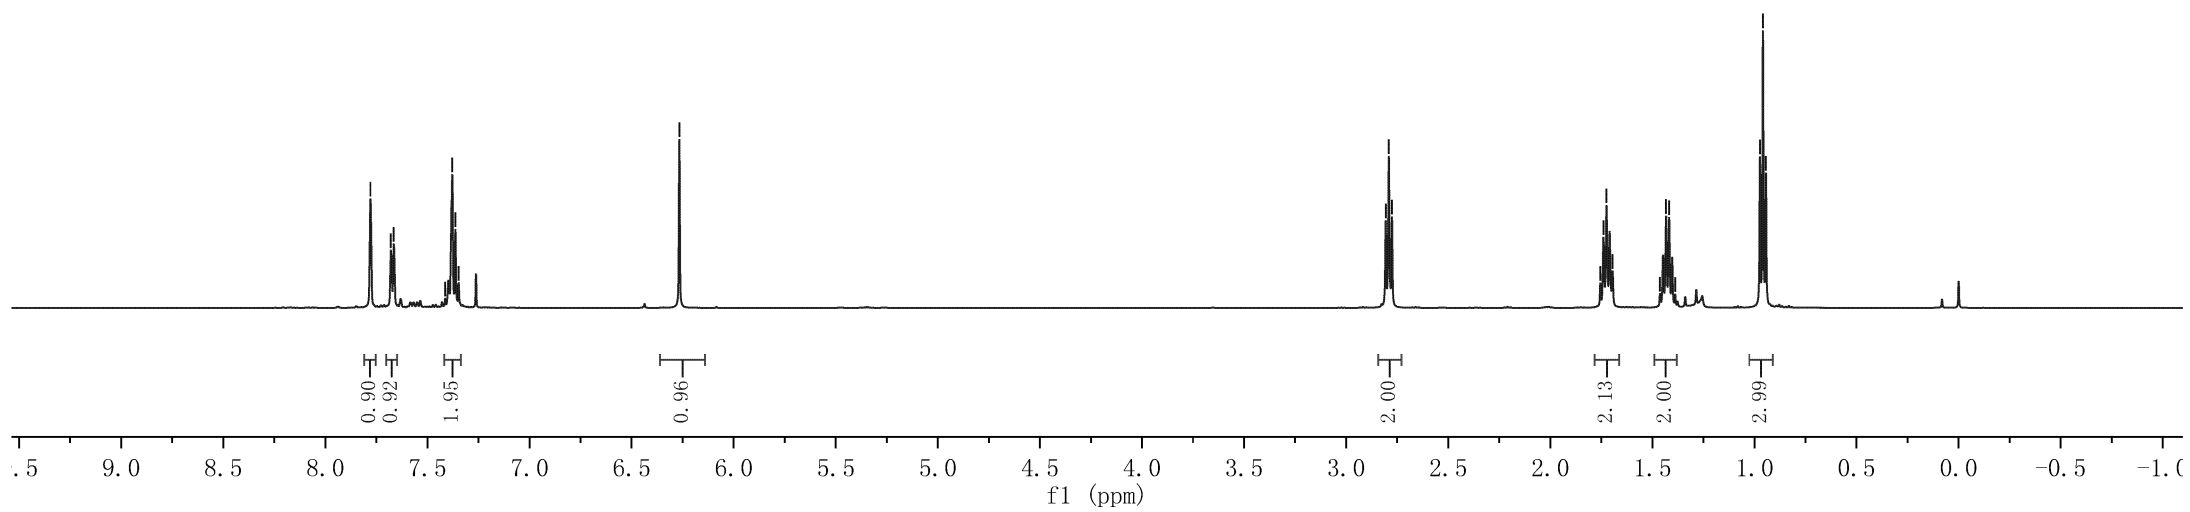

—174.67

—161.15

—134.78

—131.17

—130.07

—129.71

—126.80

—124.79

—98.67

—77.25

—77.00

—76.75

—29.51

—26.43

—22.13

—13.62

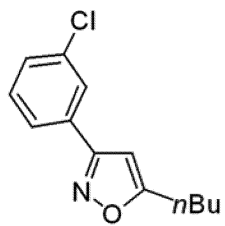

2h

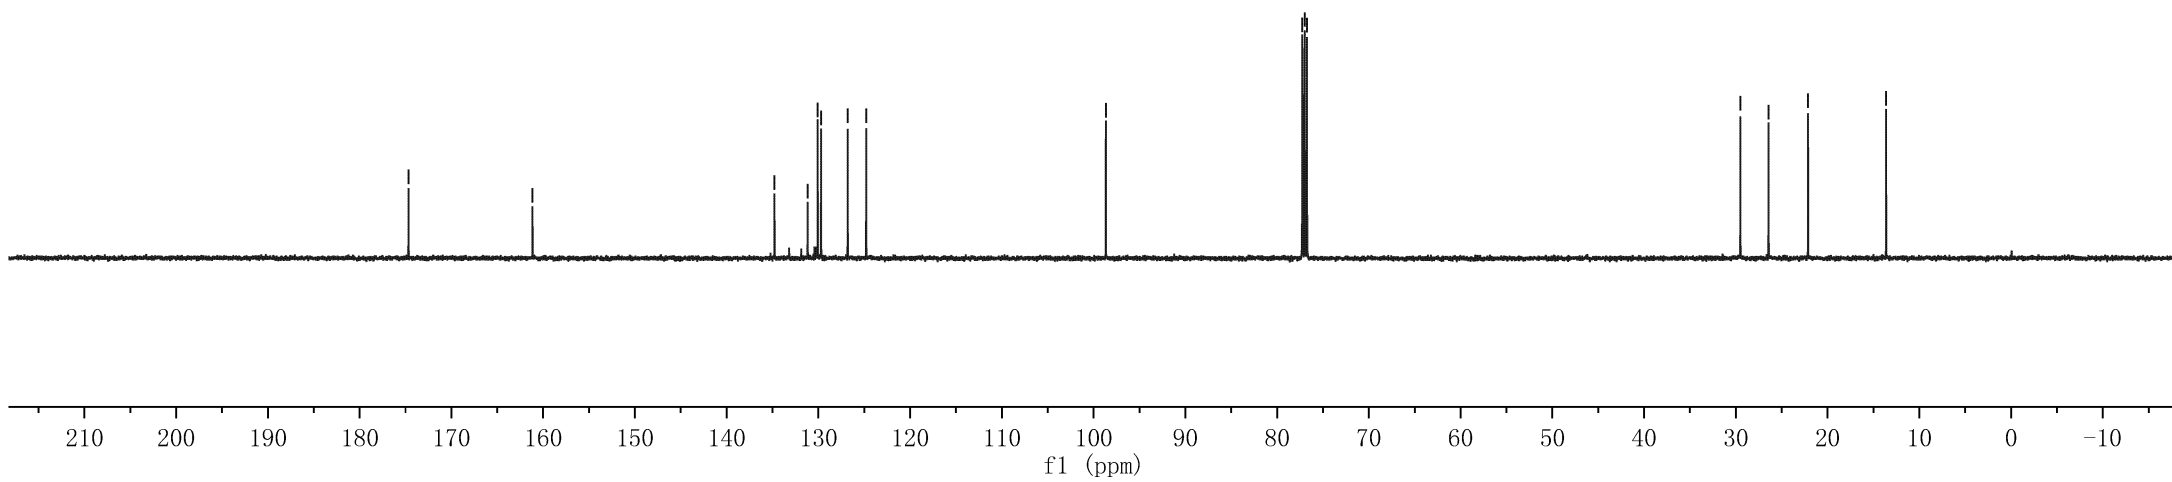

7.625  
7.574  
7.555  
7.327  
7.308  
7.289  
7.224  
7.205

6.260

2.783  
2.764  
2.745

2.384

1.748  
1.710  
1.686  
1.672  
1.459  
1.422  
1.403  
1.366

0.965  
0.947  
0.928

0.000

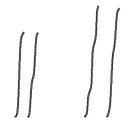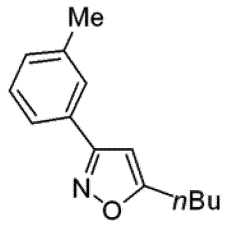

2i

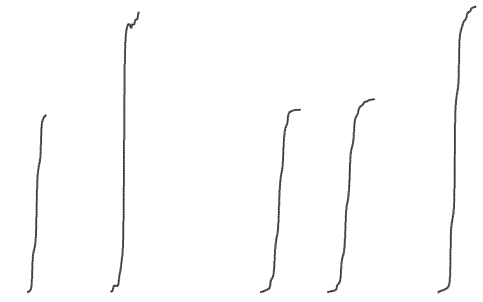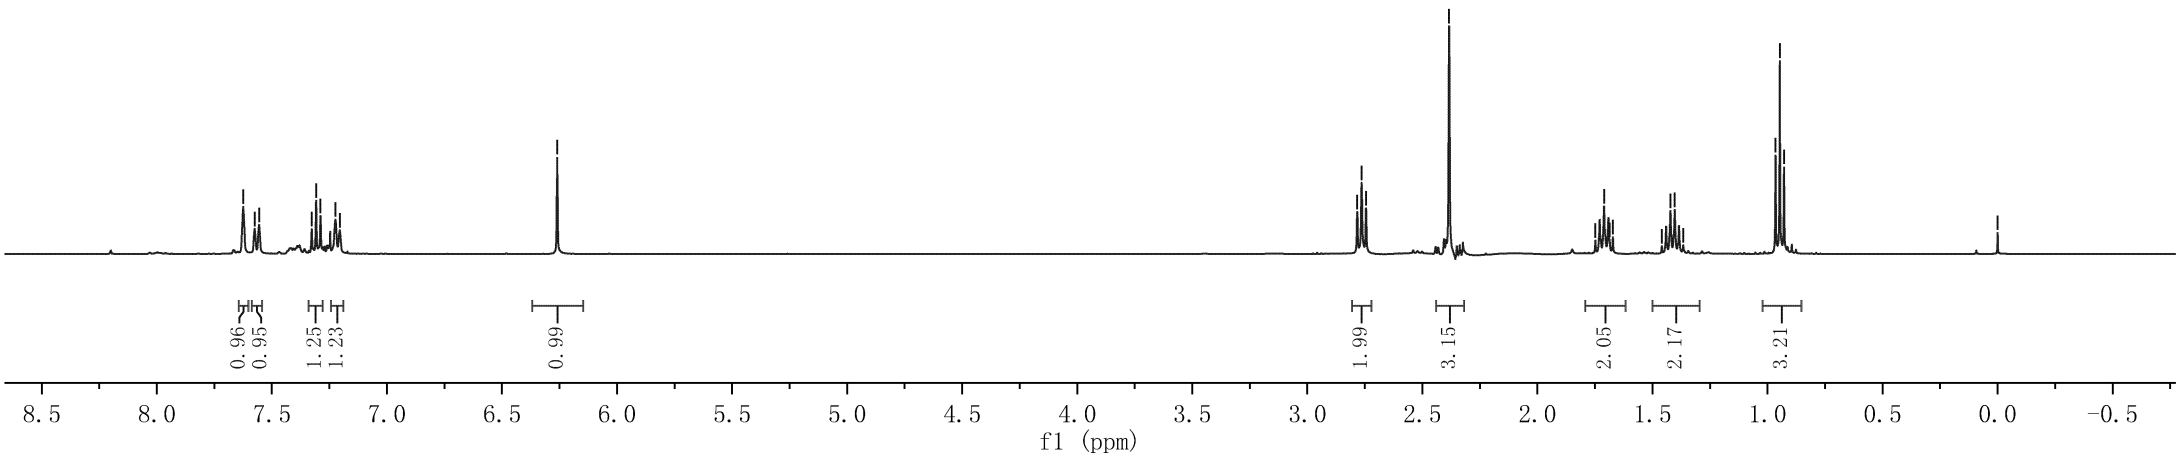

—174.13  
—162.39  
—138.51  
130.49  
129.28  
128.69  
127.33  
123.85

—98.78  
77.32  
77.00  
76.68

29.57  
26.47  
22.17  
21.35  
—13.67

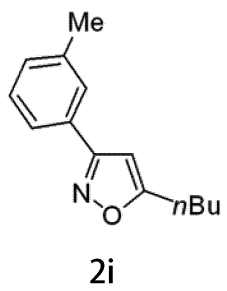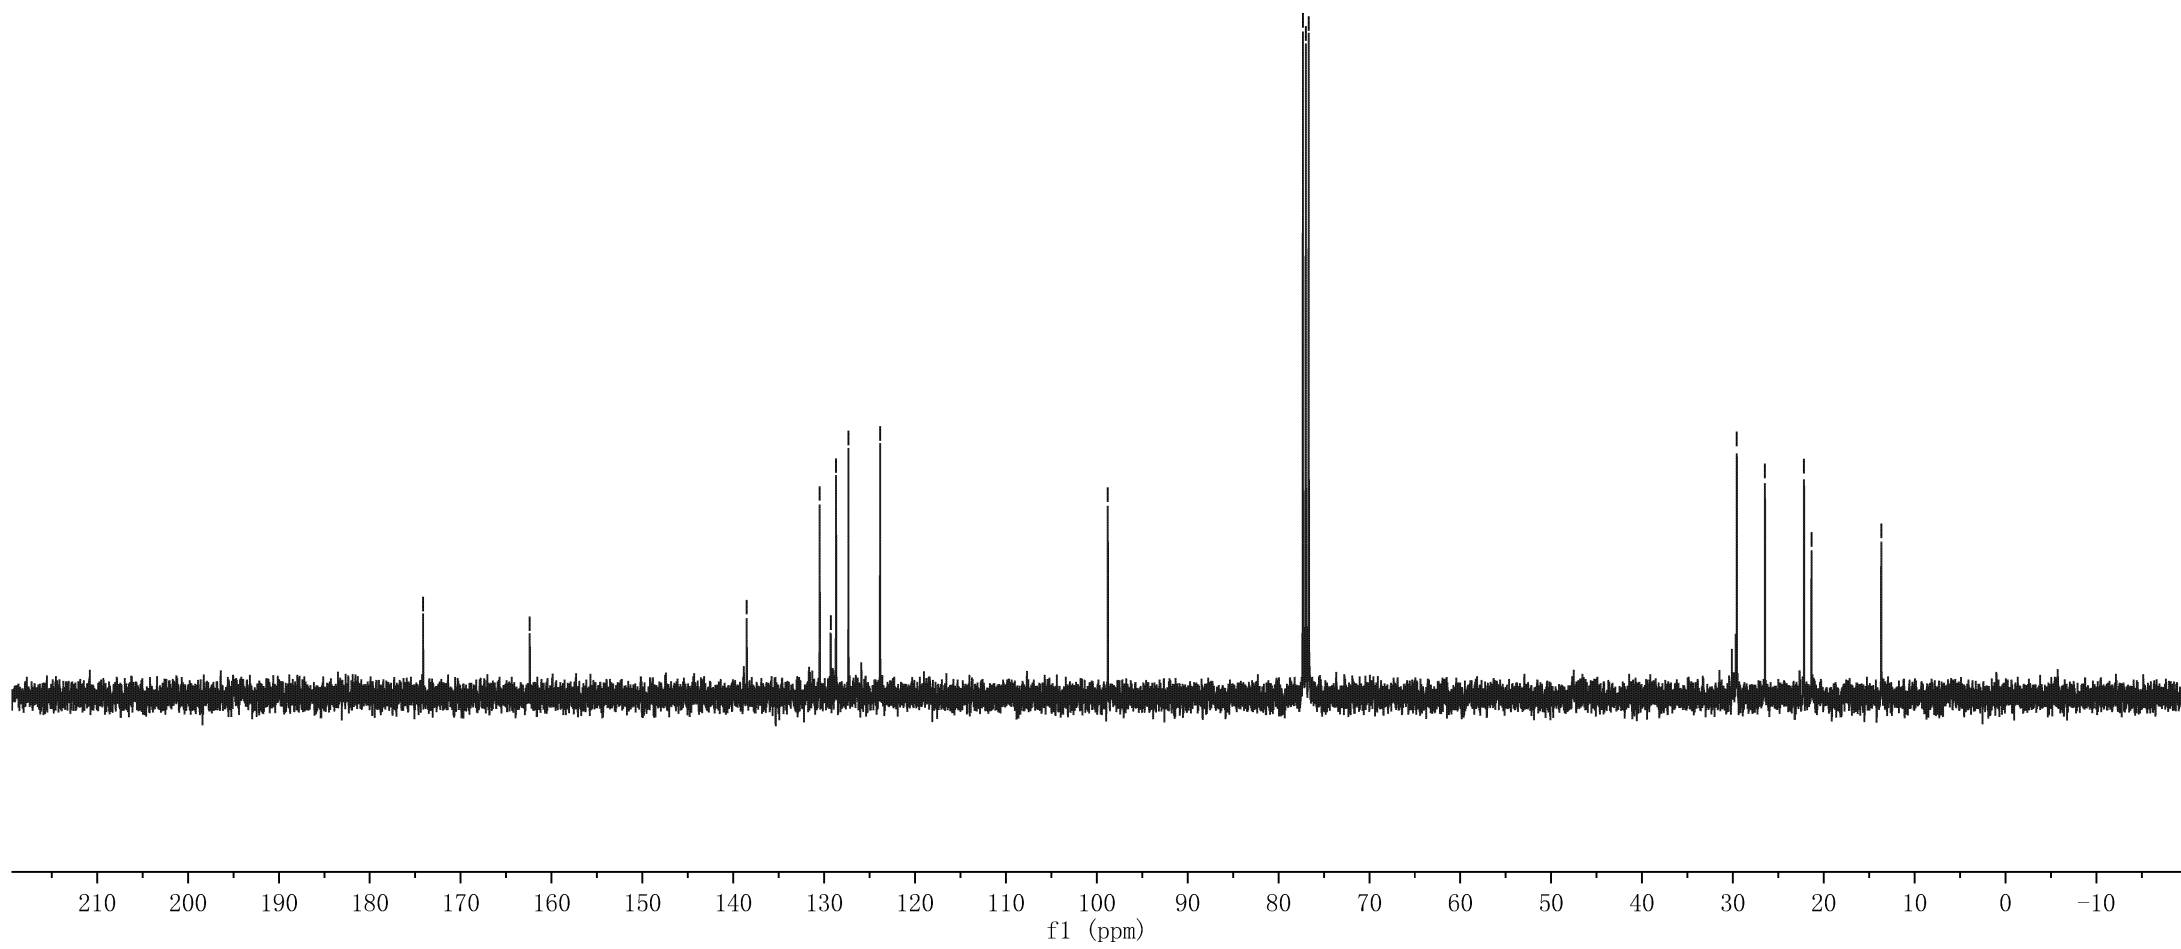

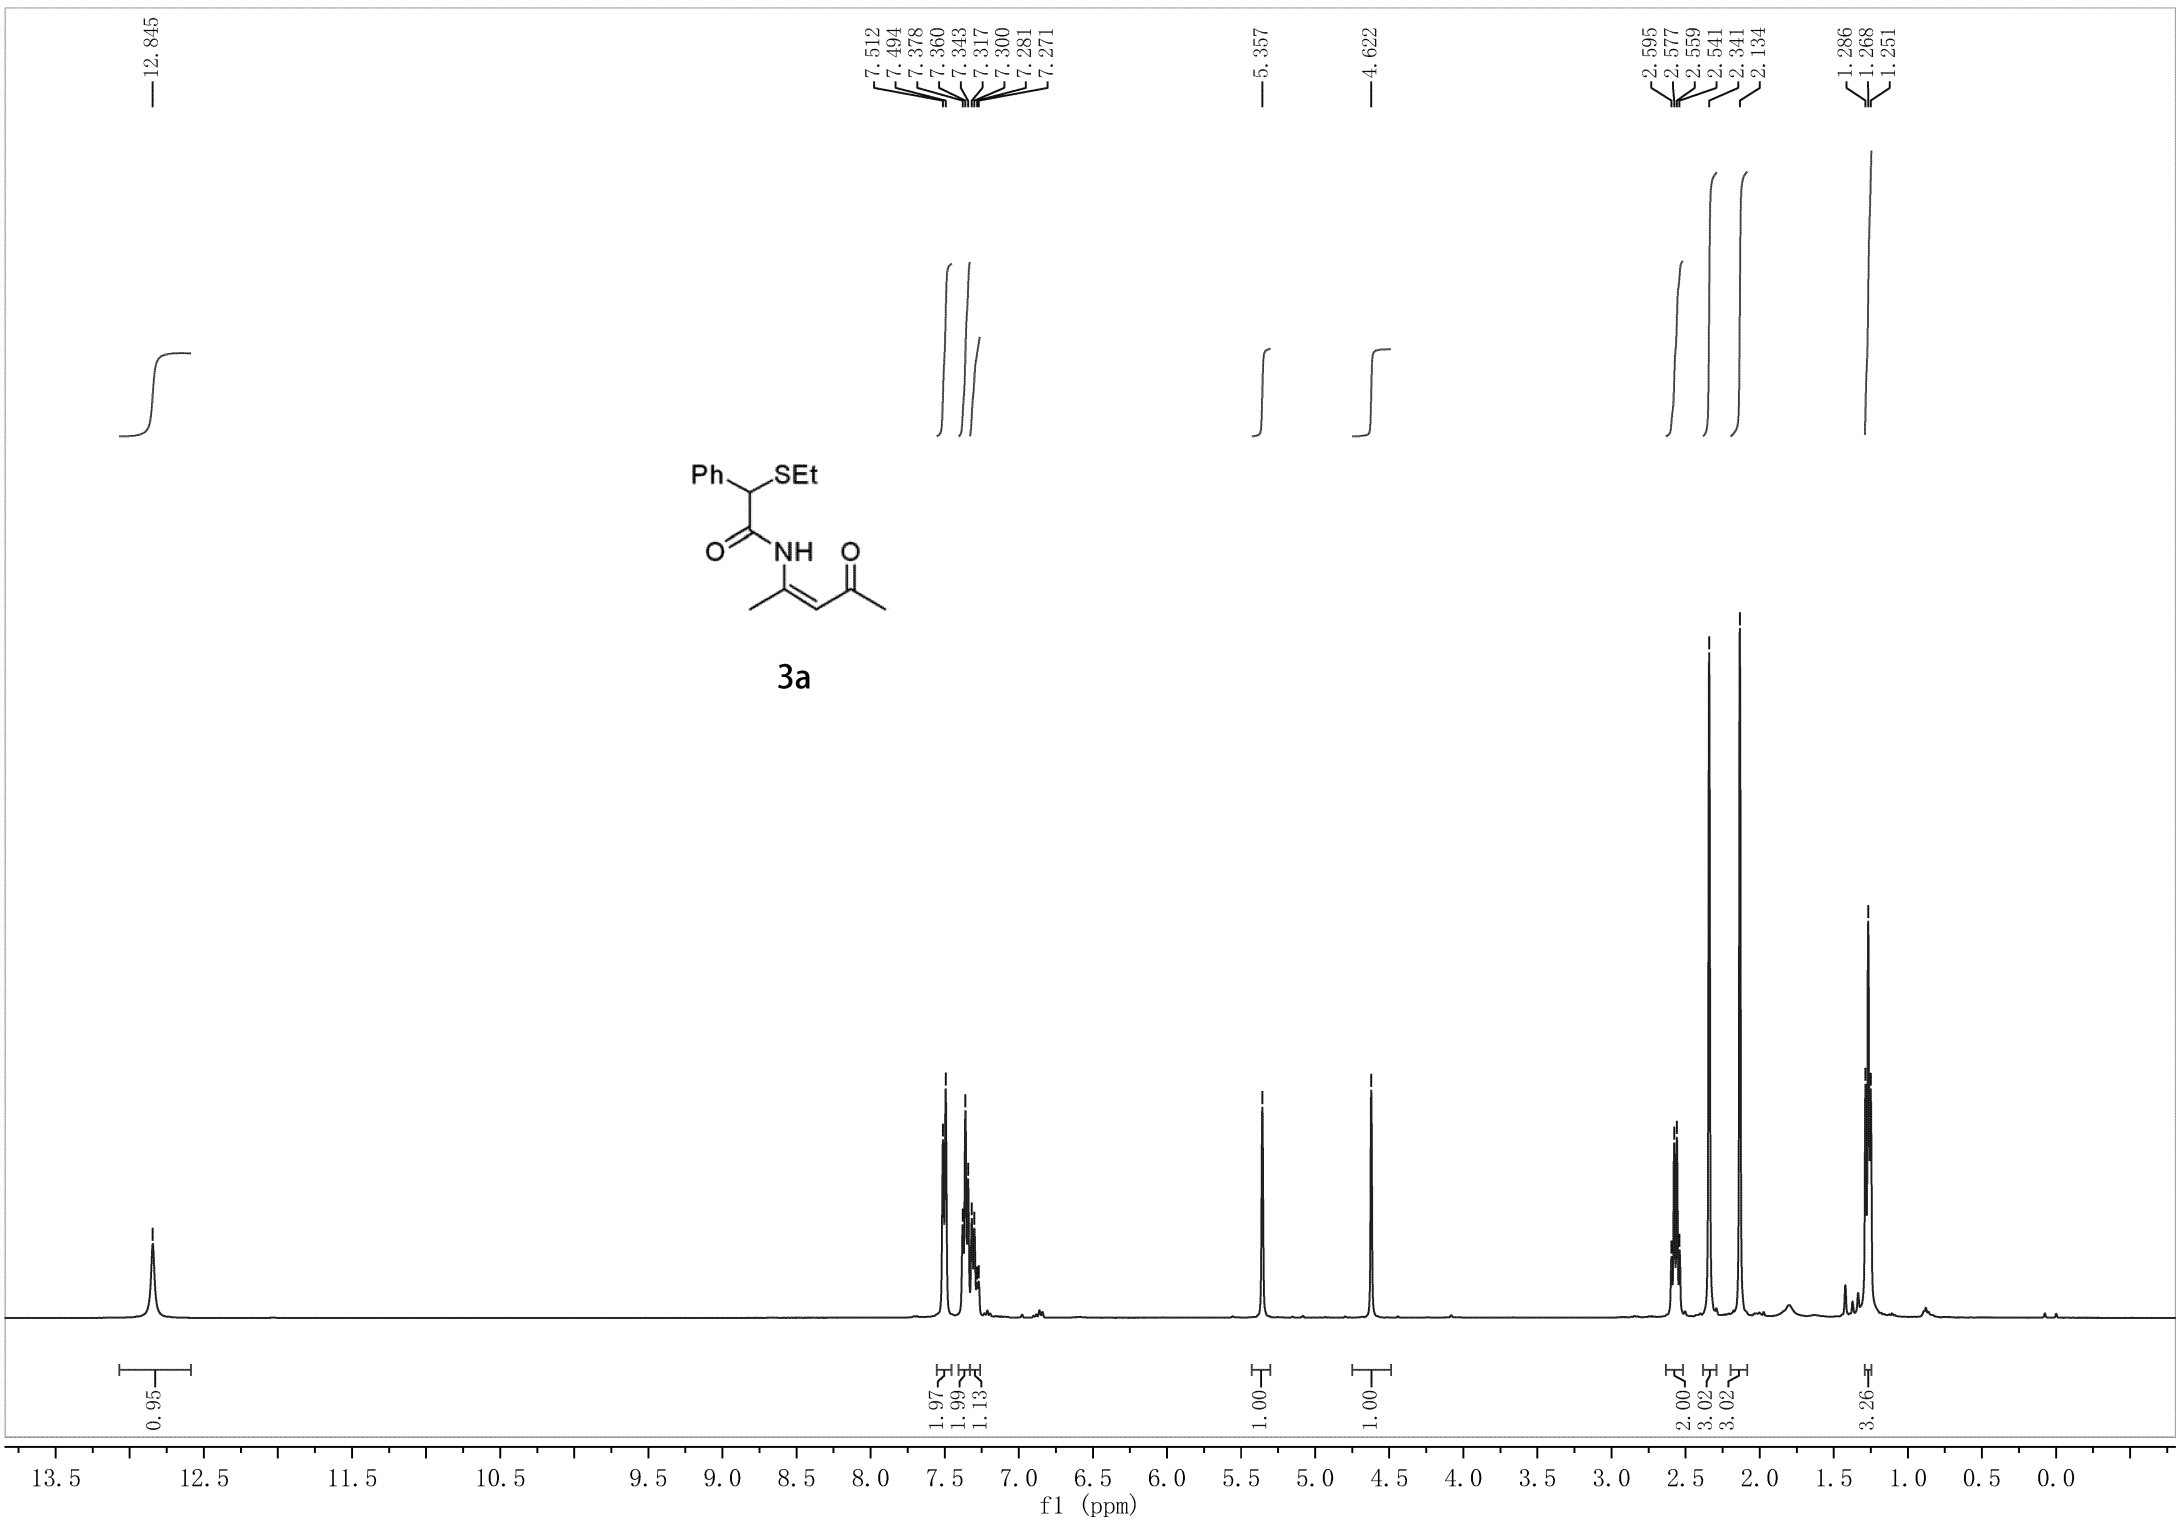

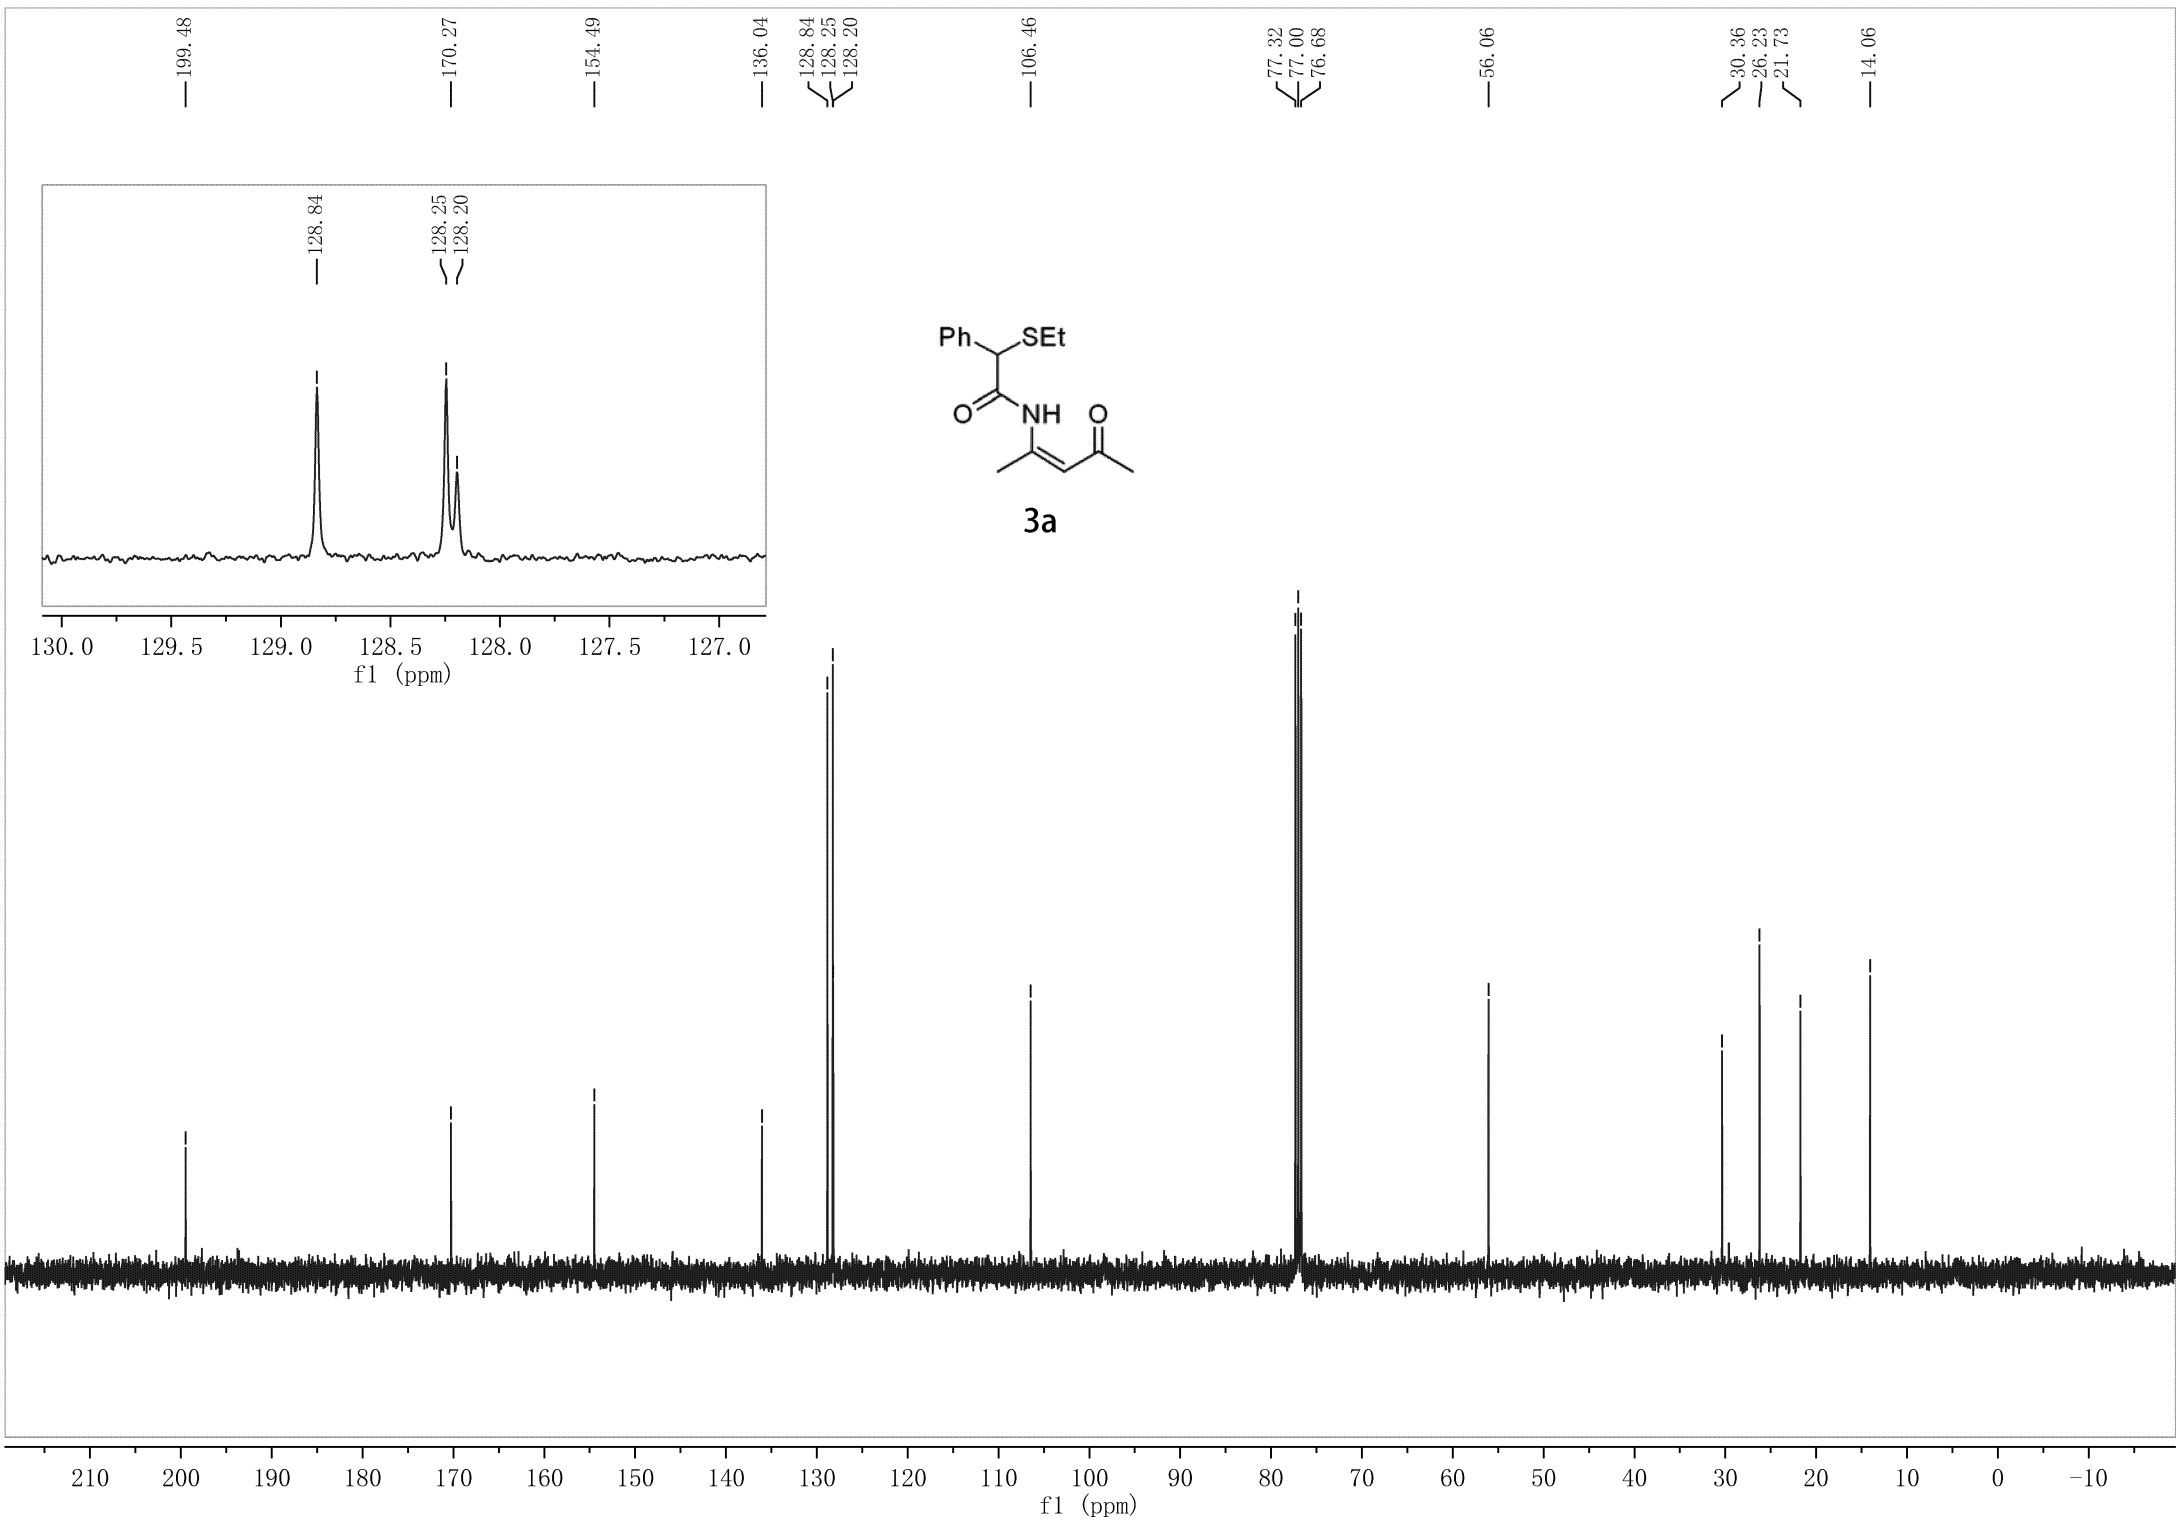

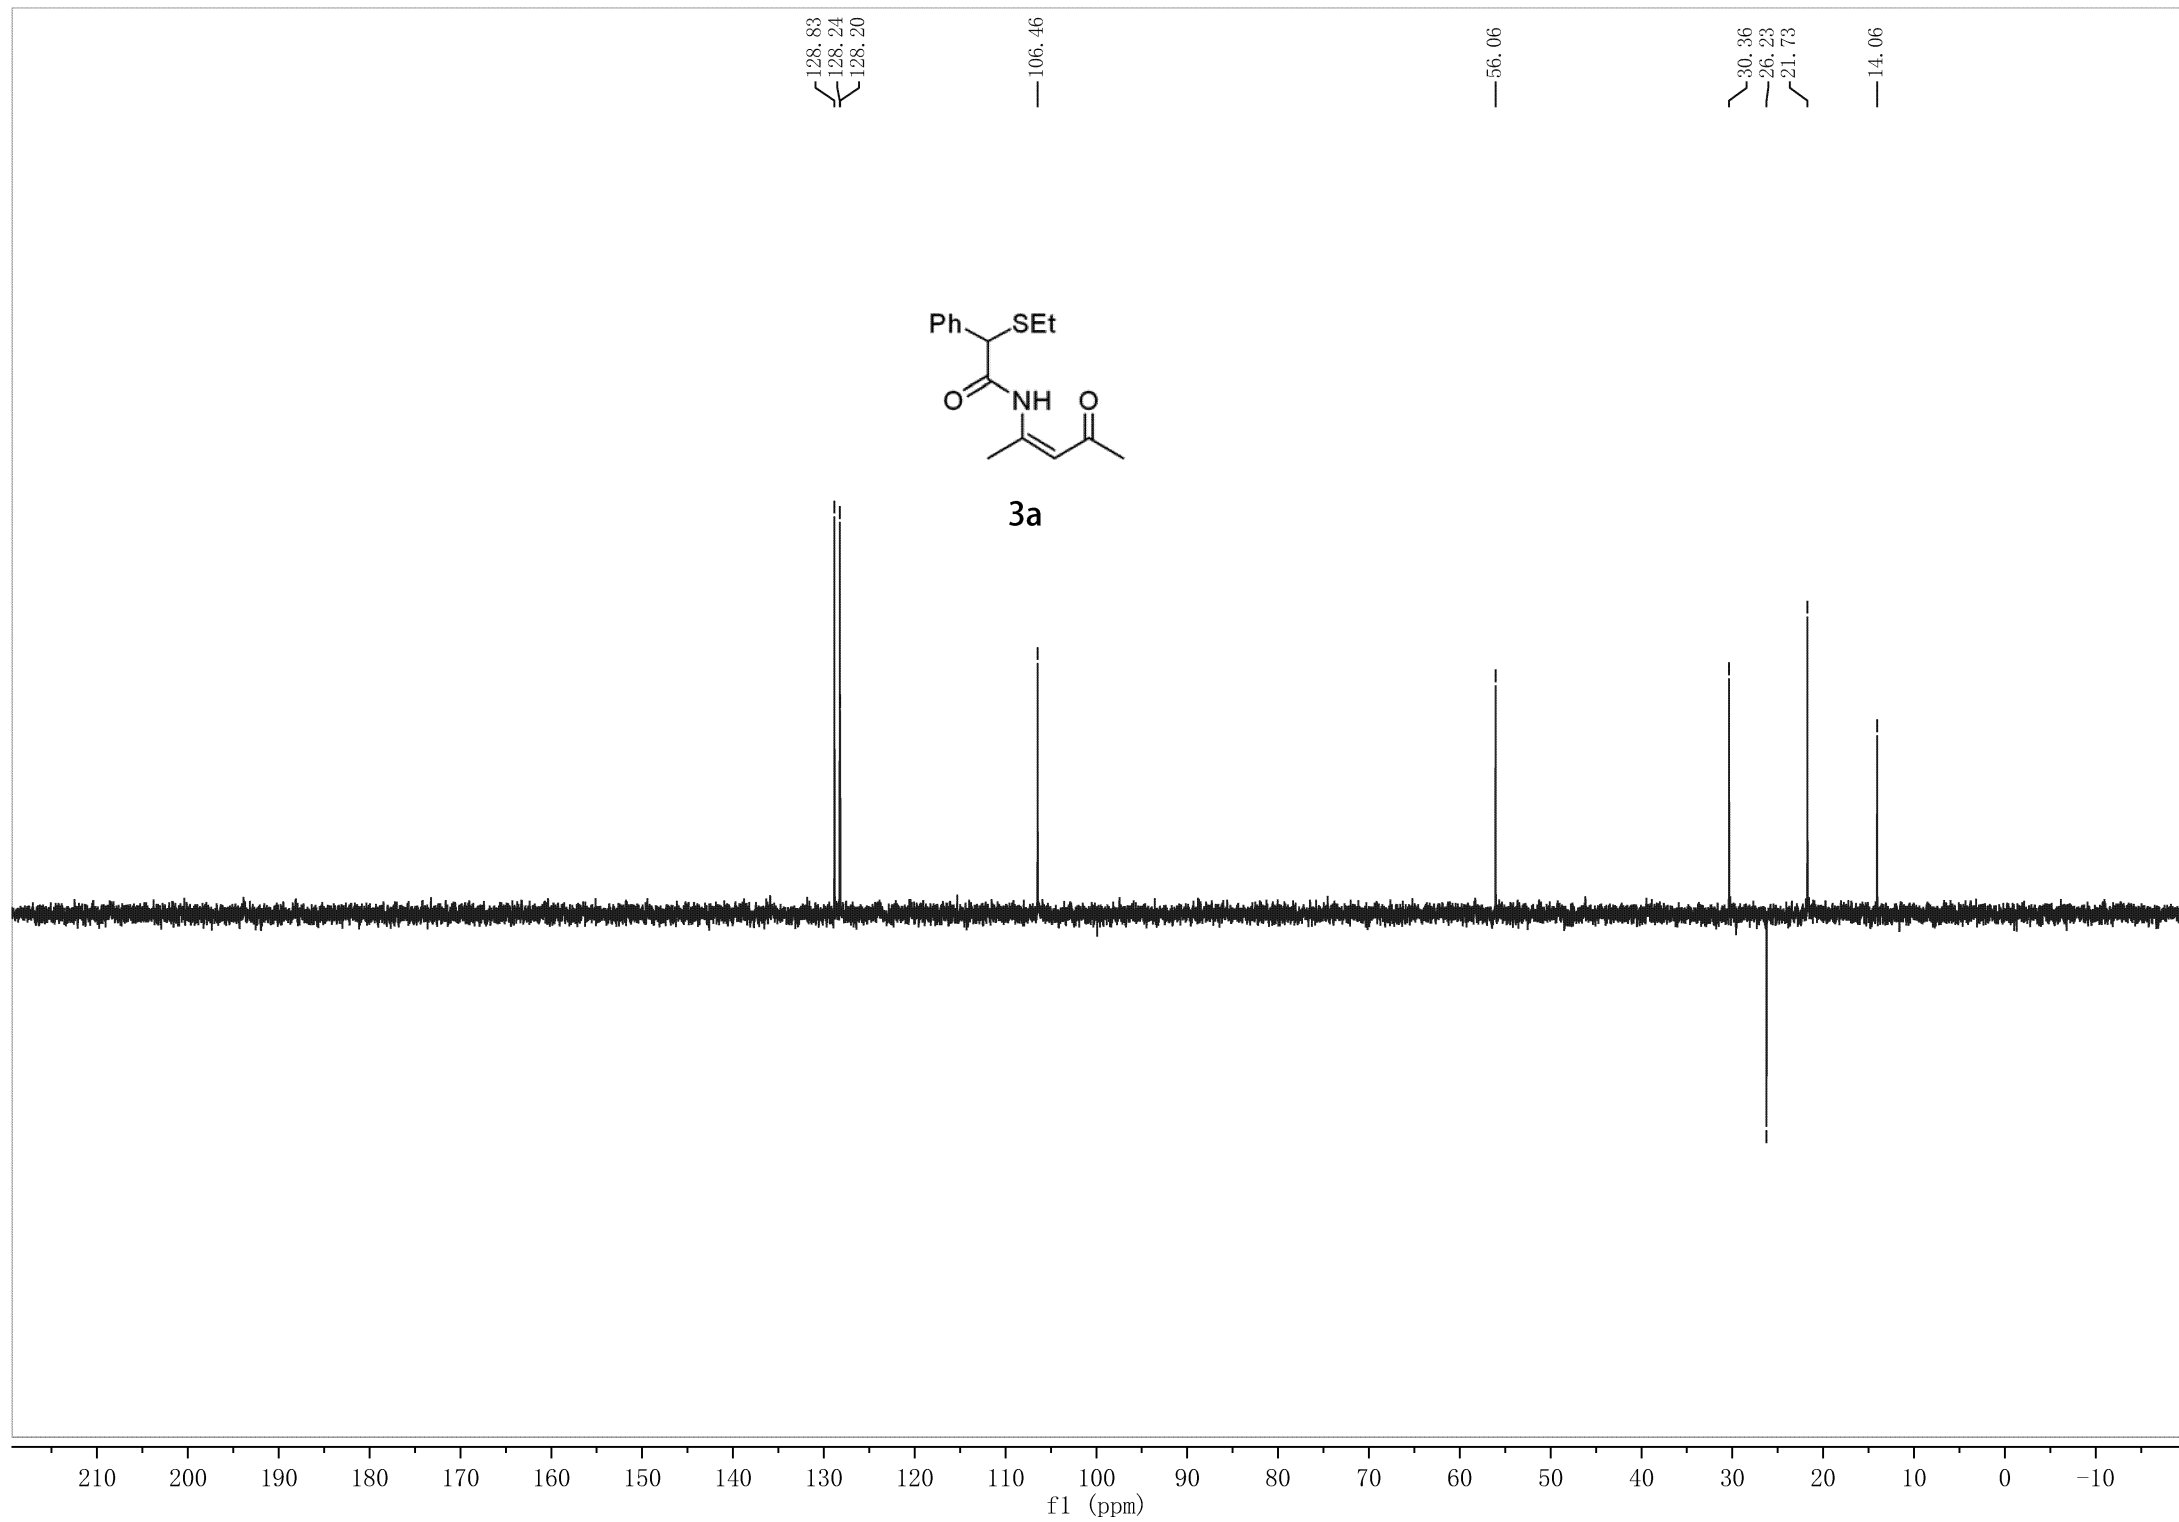



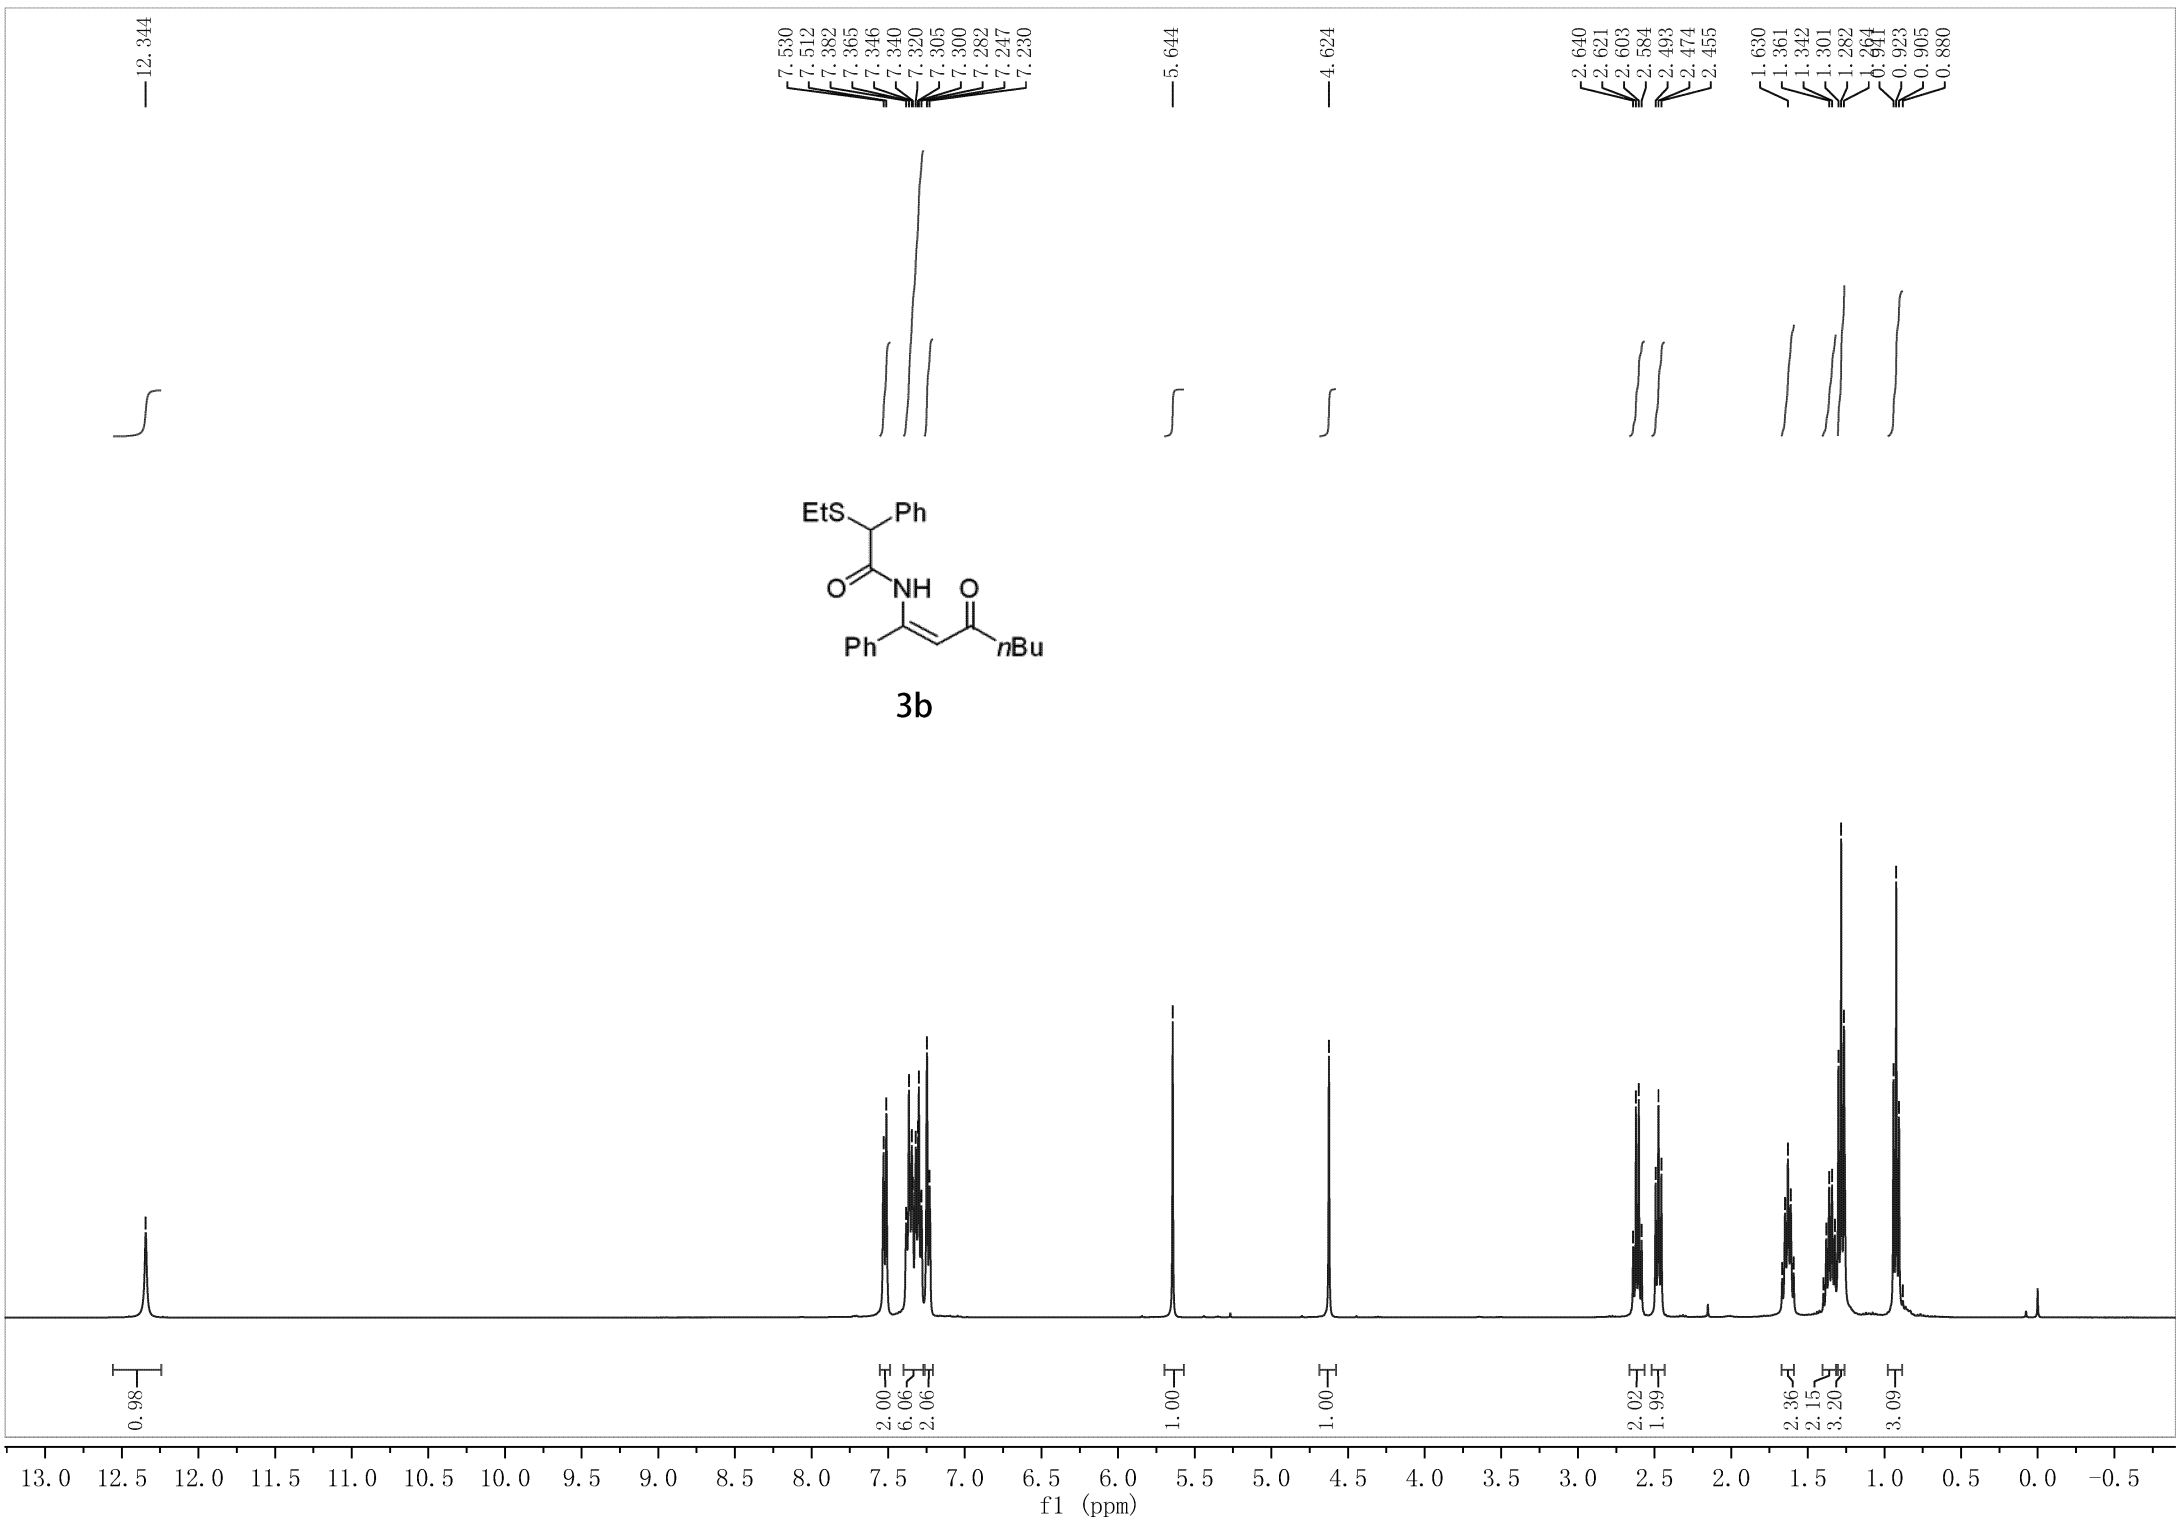

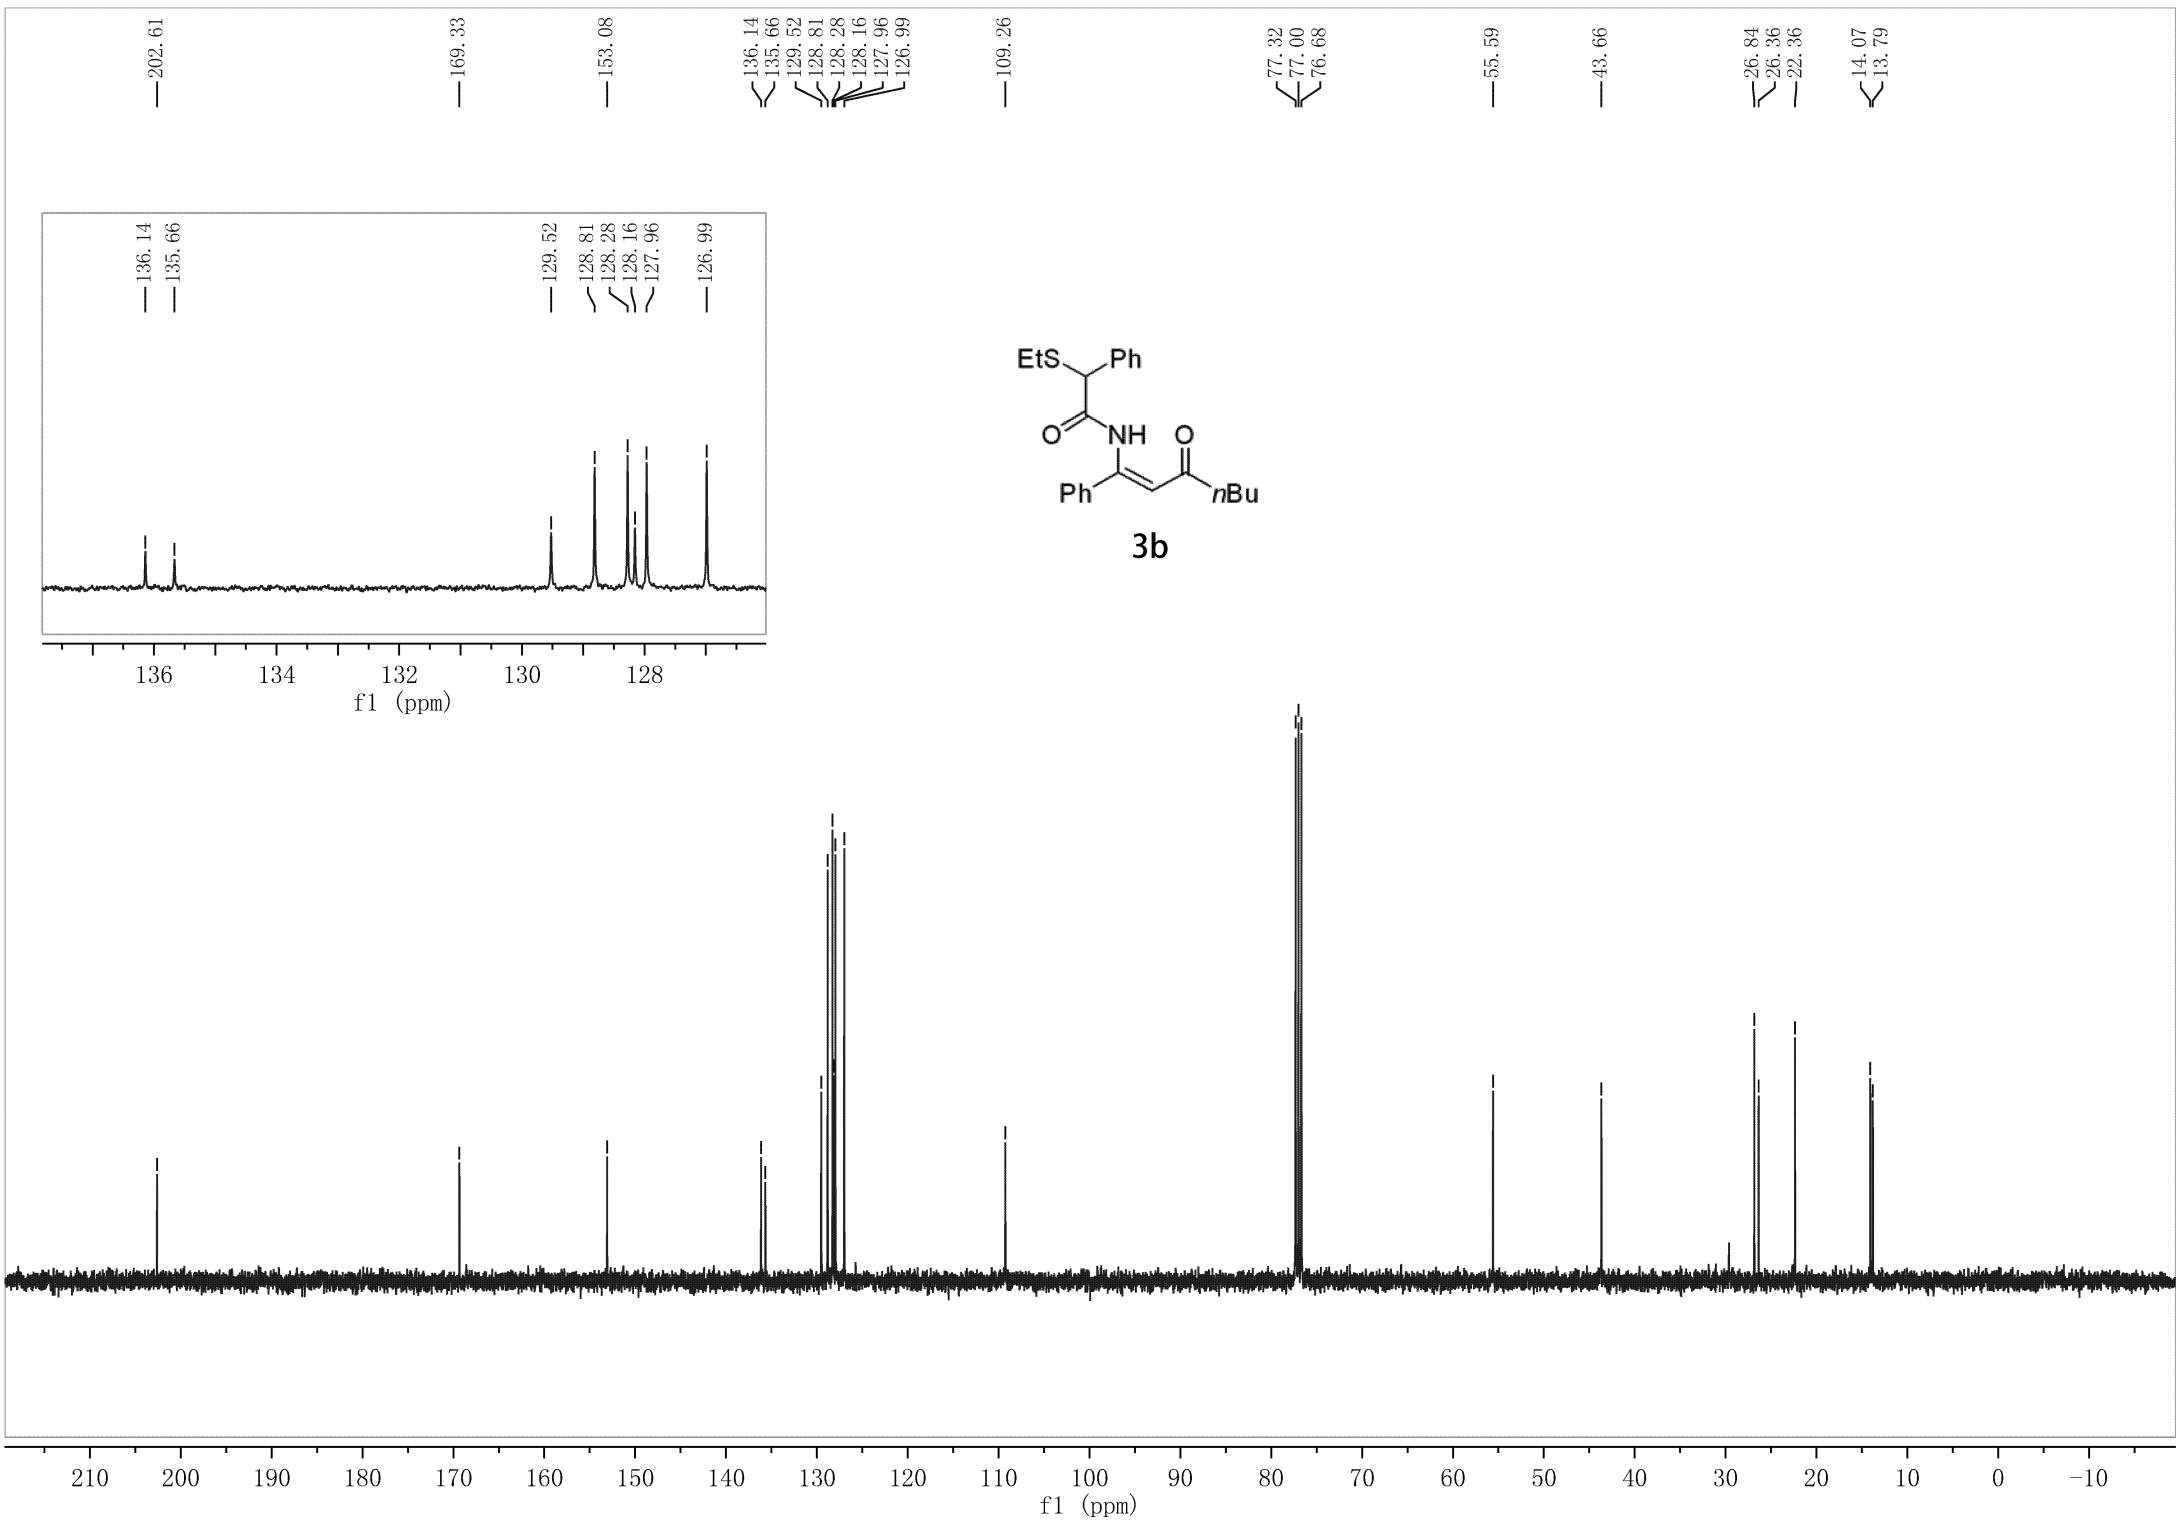

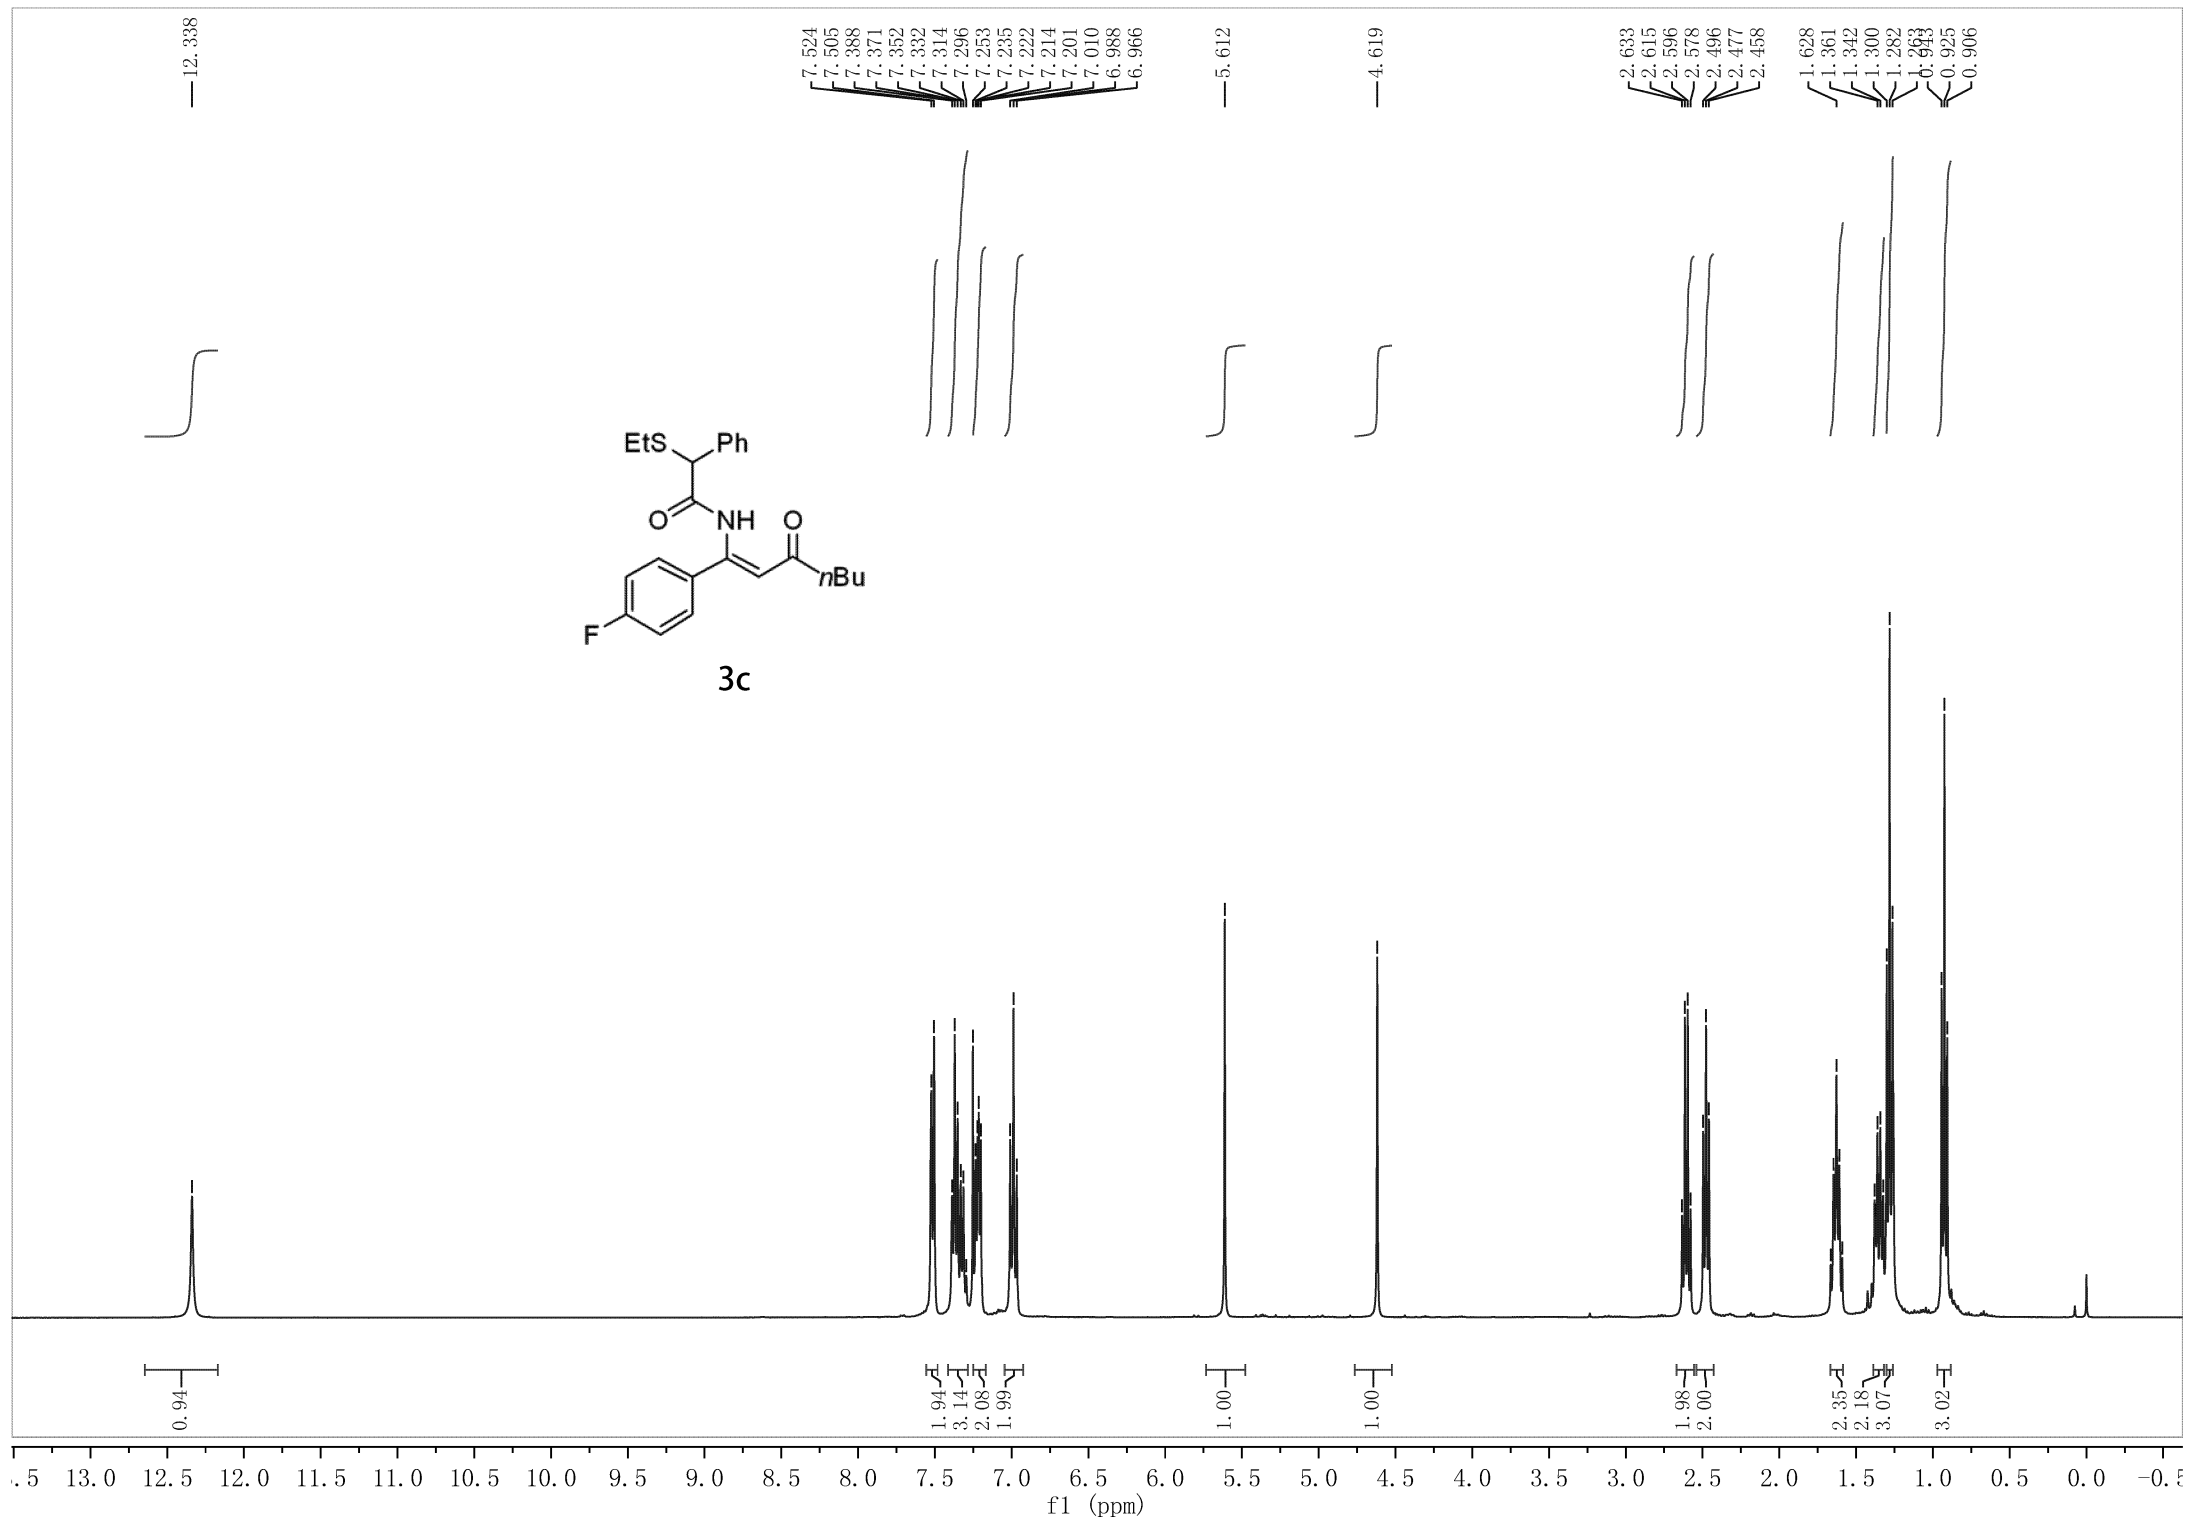

— 202.54

— 169.51

— 164.72

— 162.23

— 151.96

136.08

131.66

131.62

129.02

128.93

128.87

128.26

115.23

115.01

— 109.22

77.32

77.00

76.68

— 55.64

— 43.67

26.81

26.39

22.36

14.07

13.80

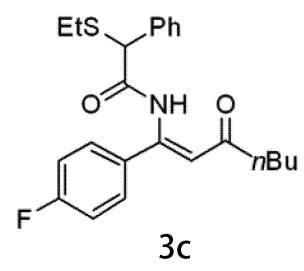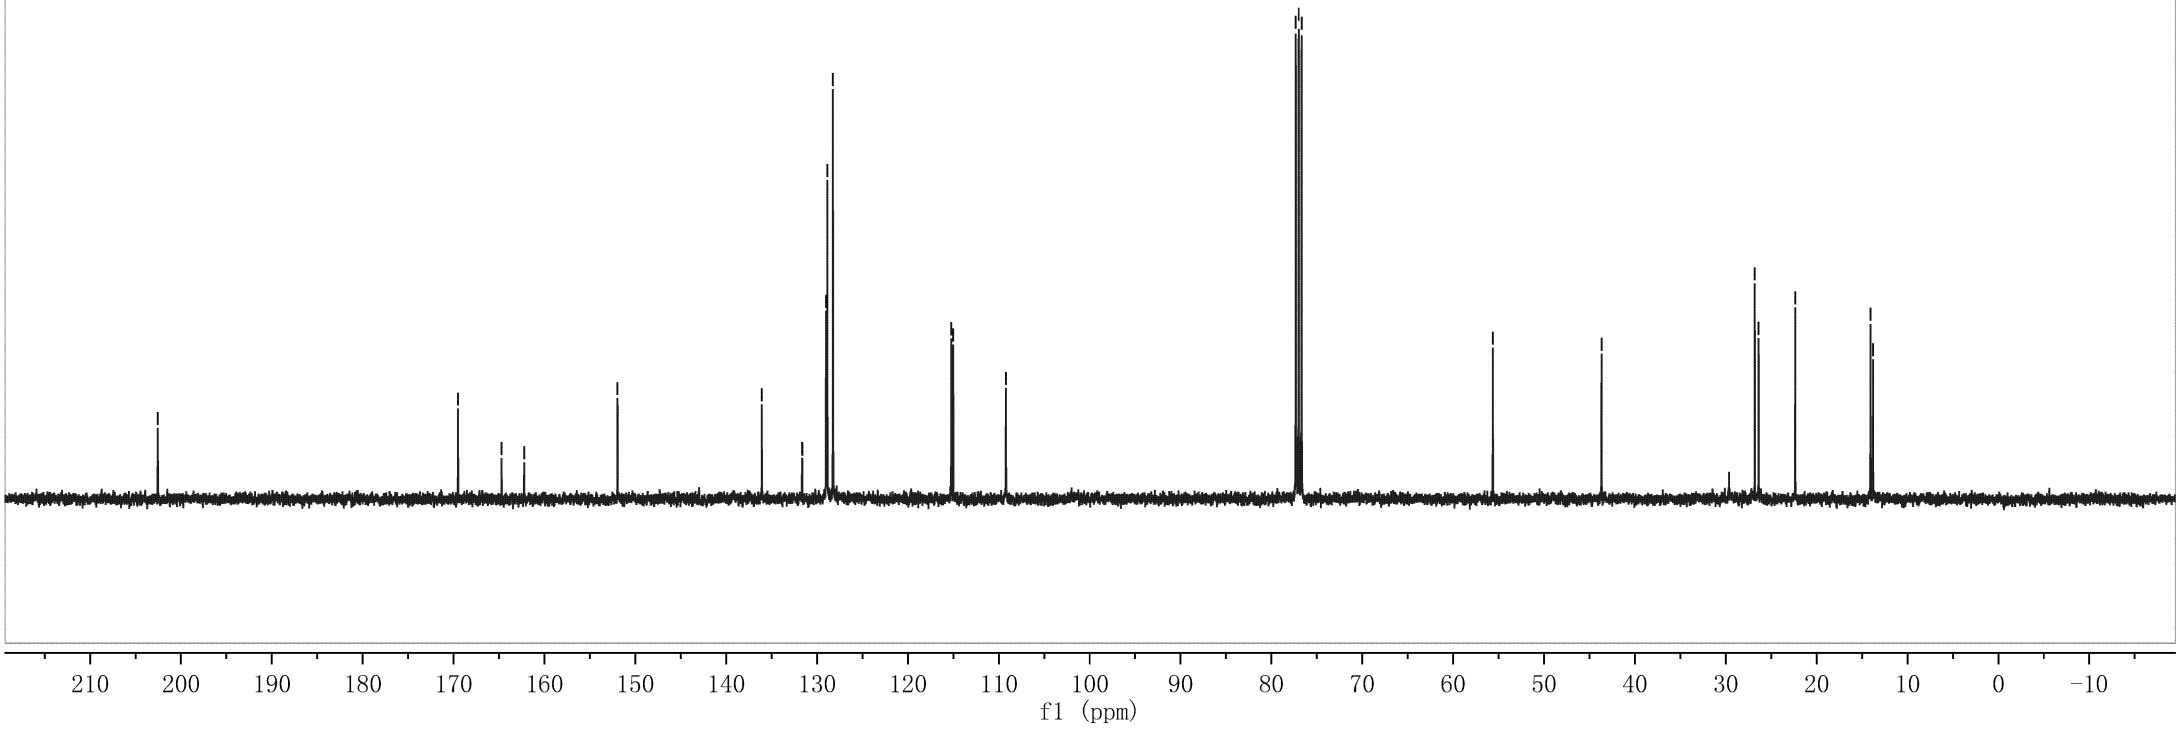

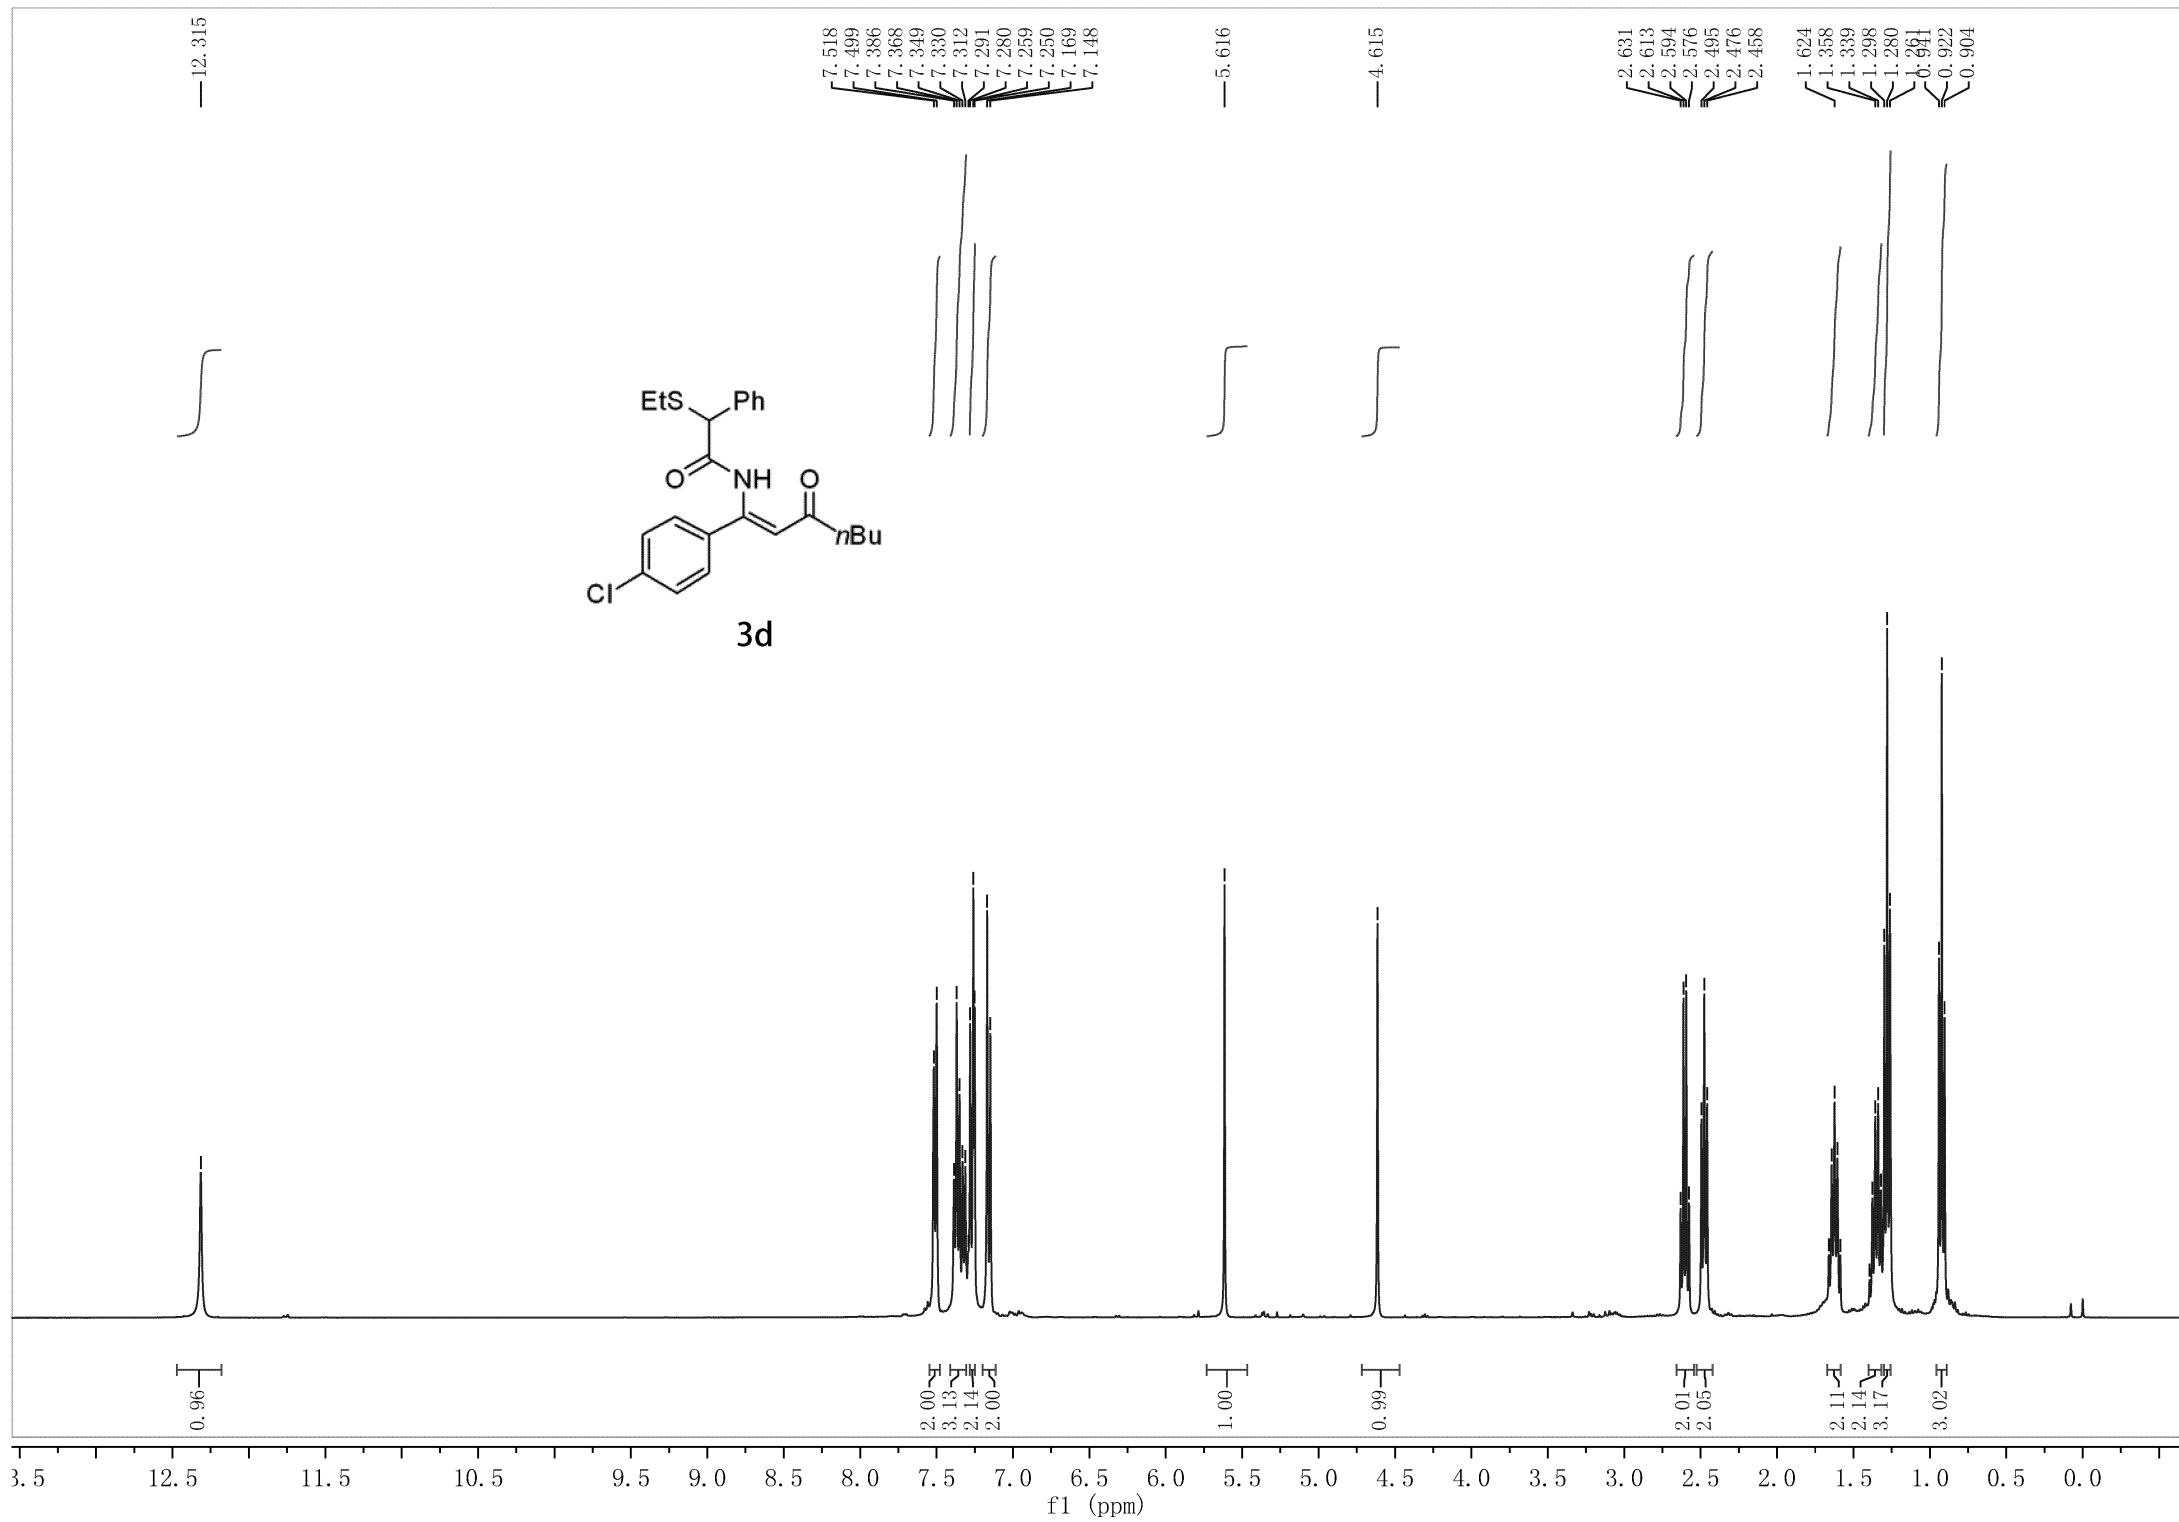

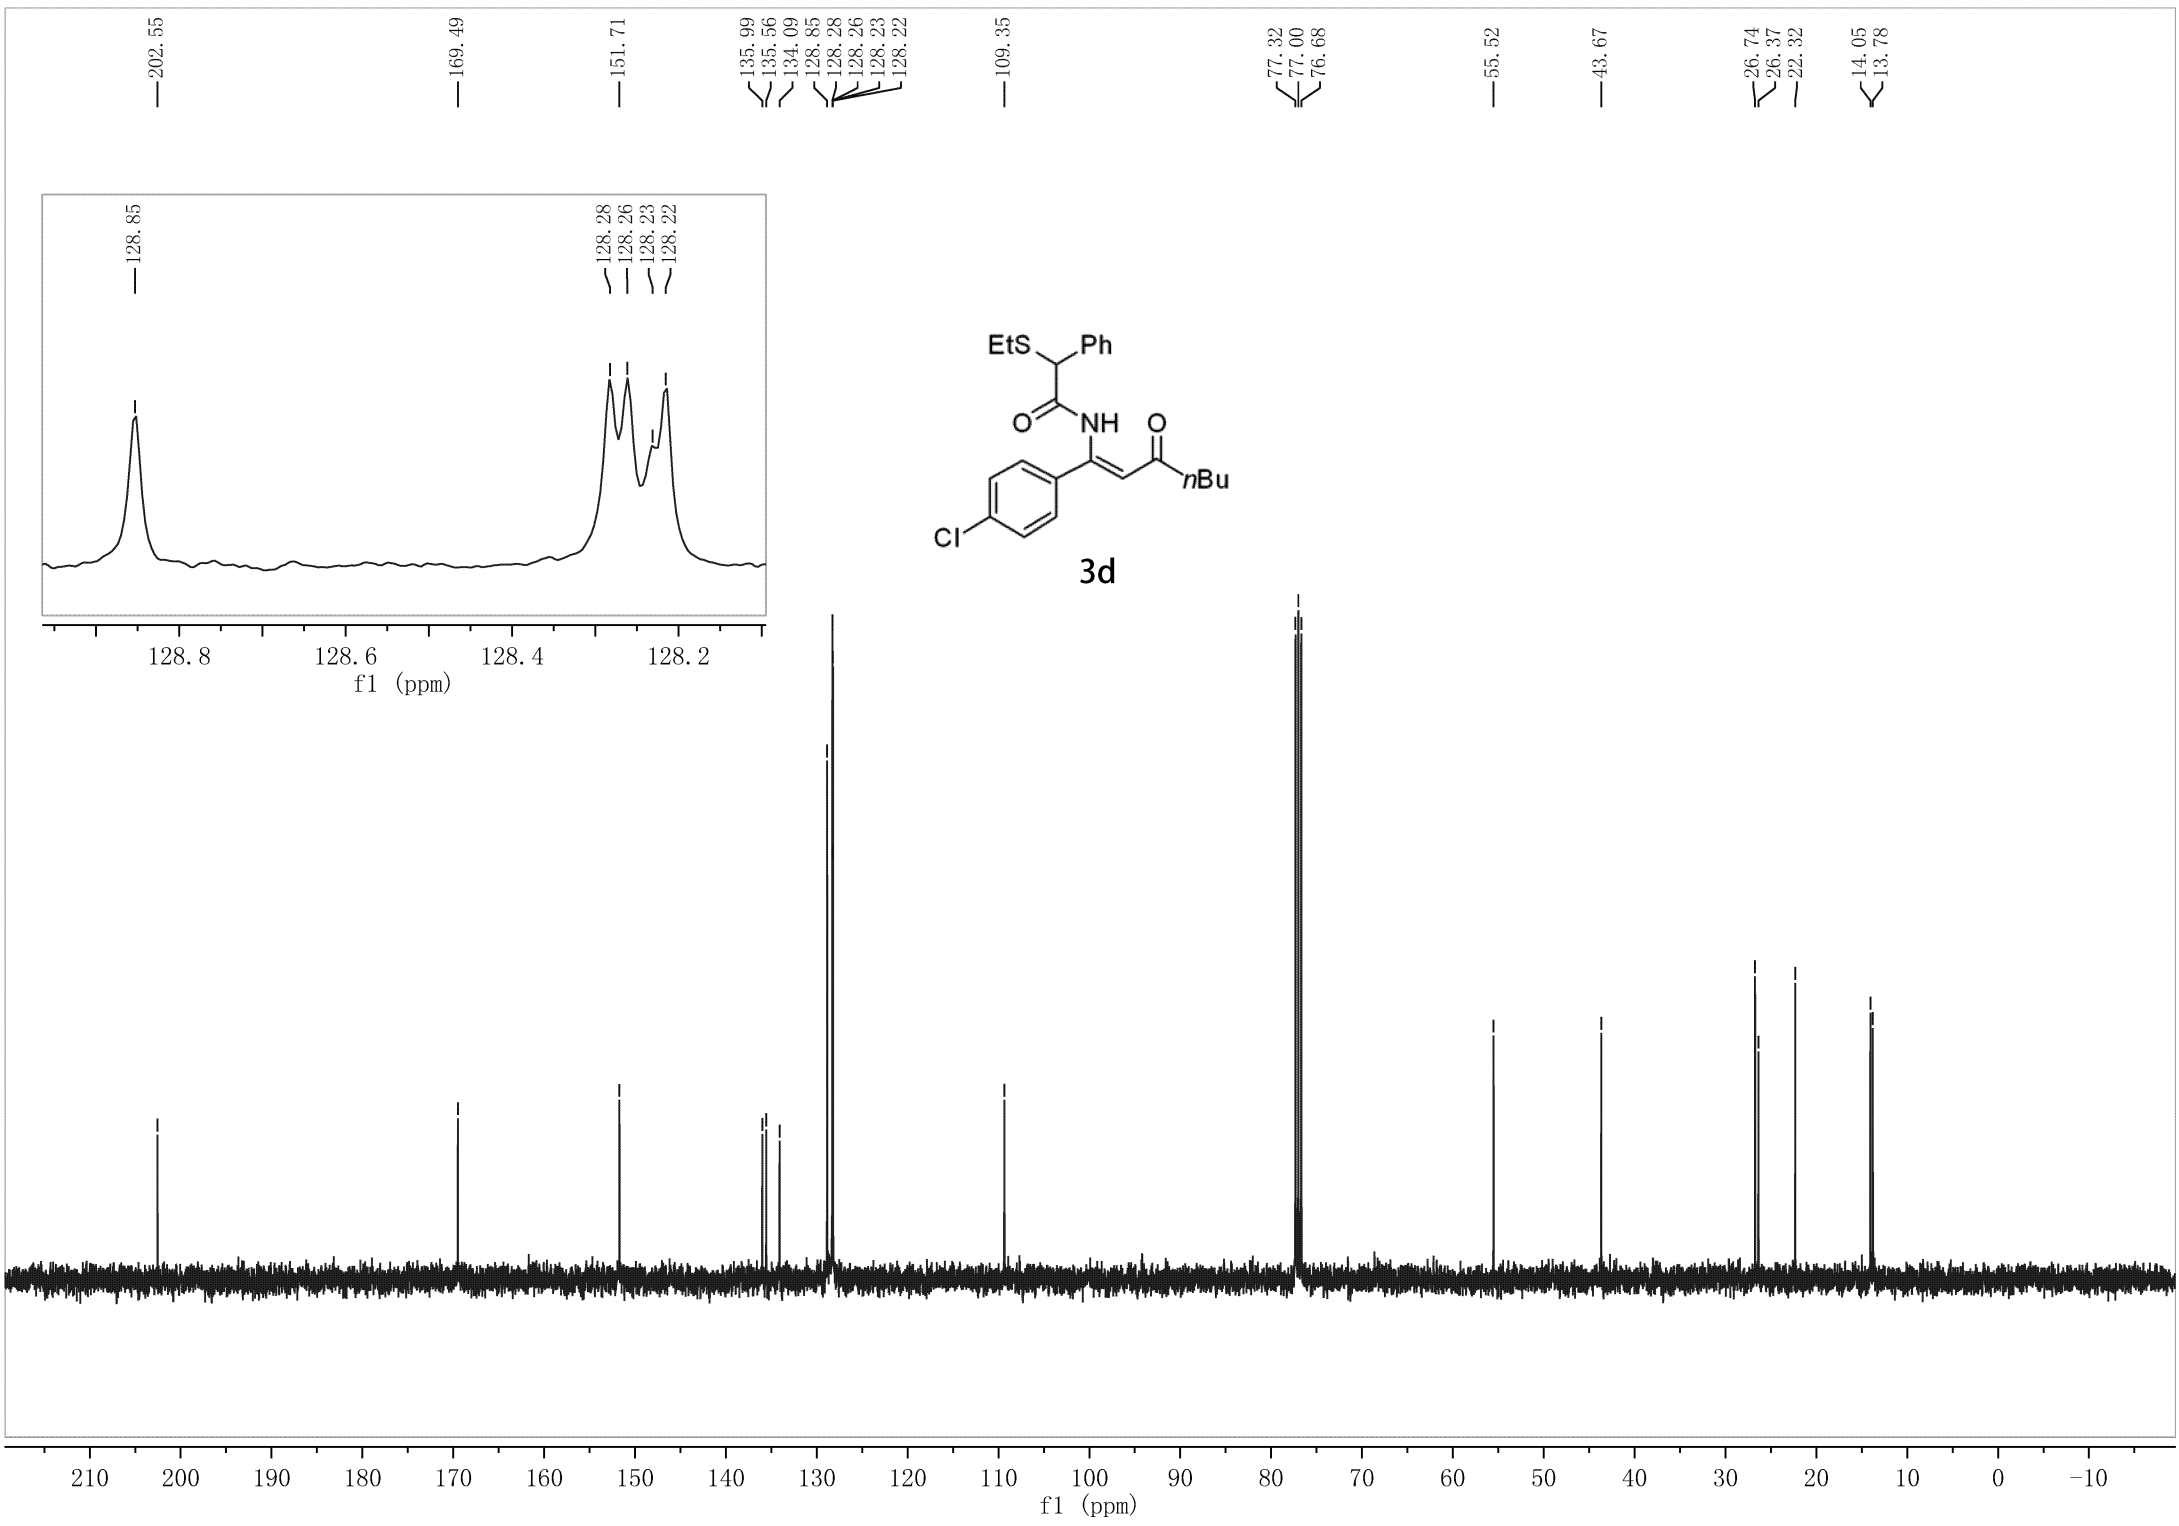

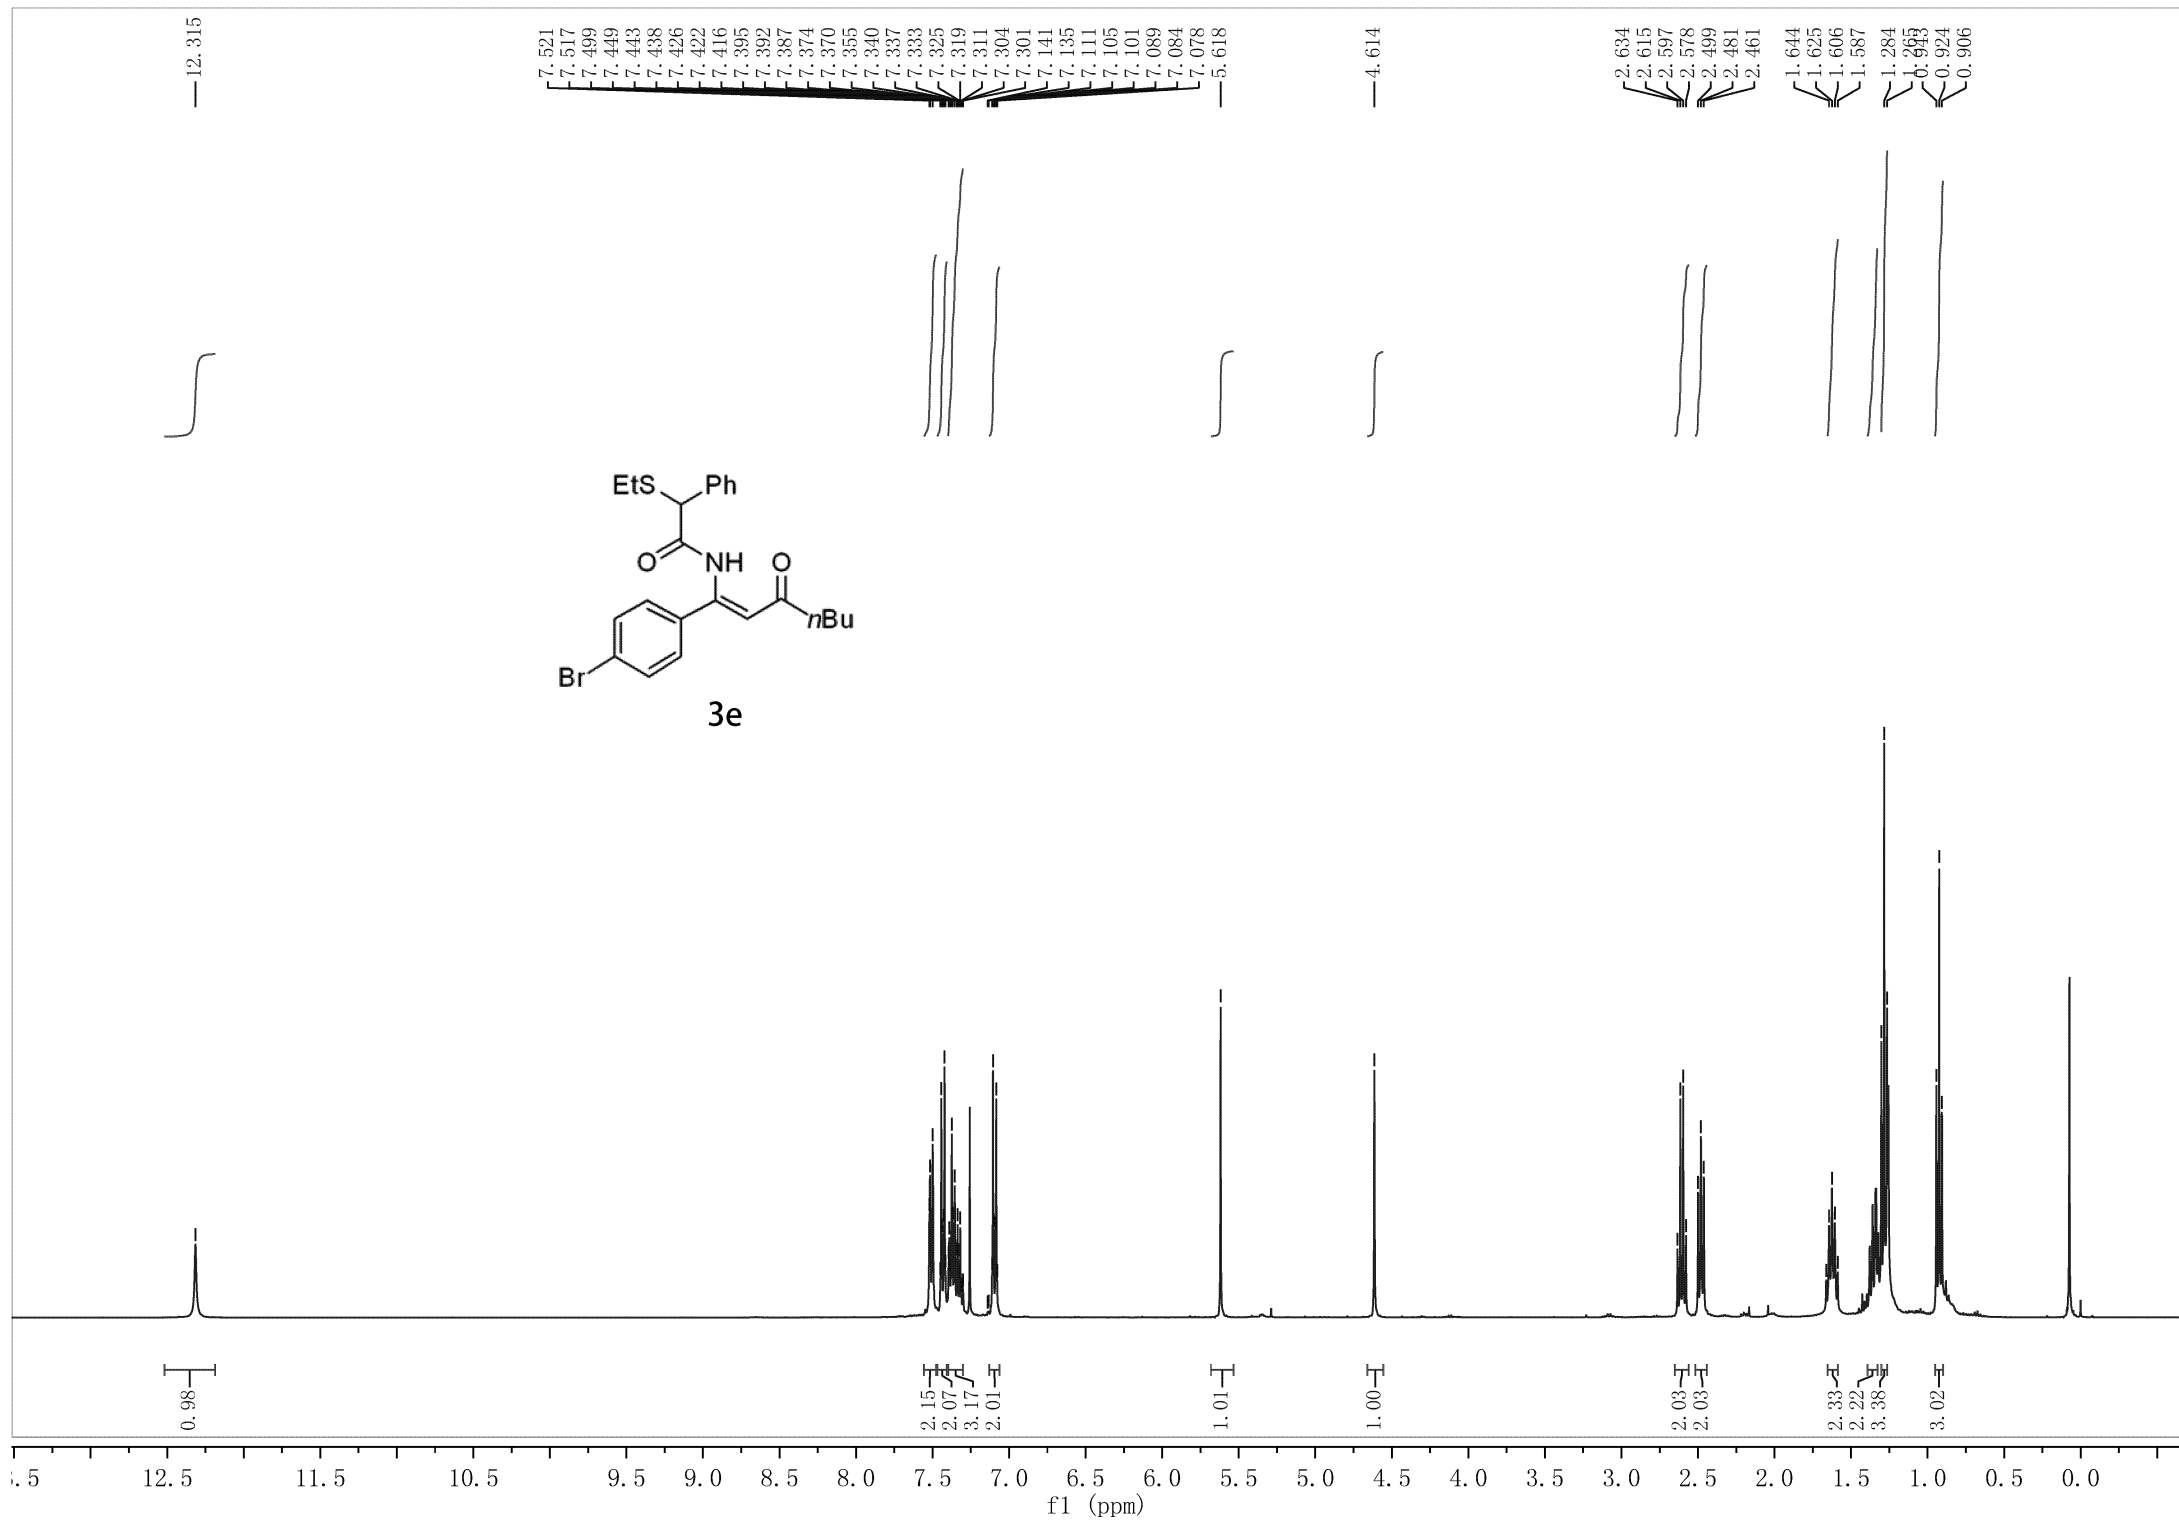

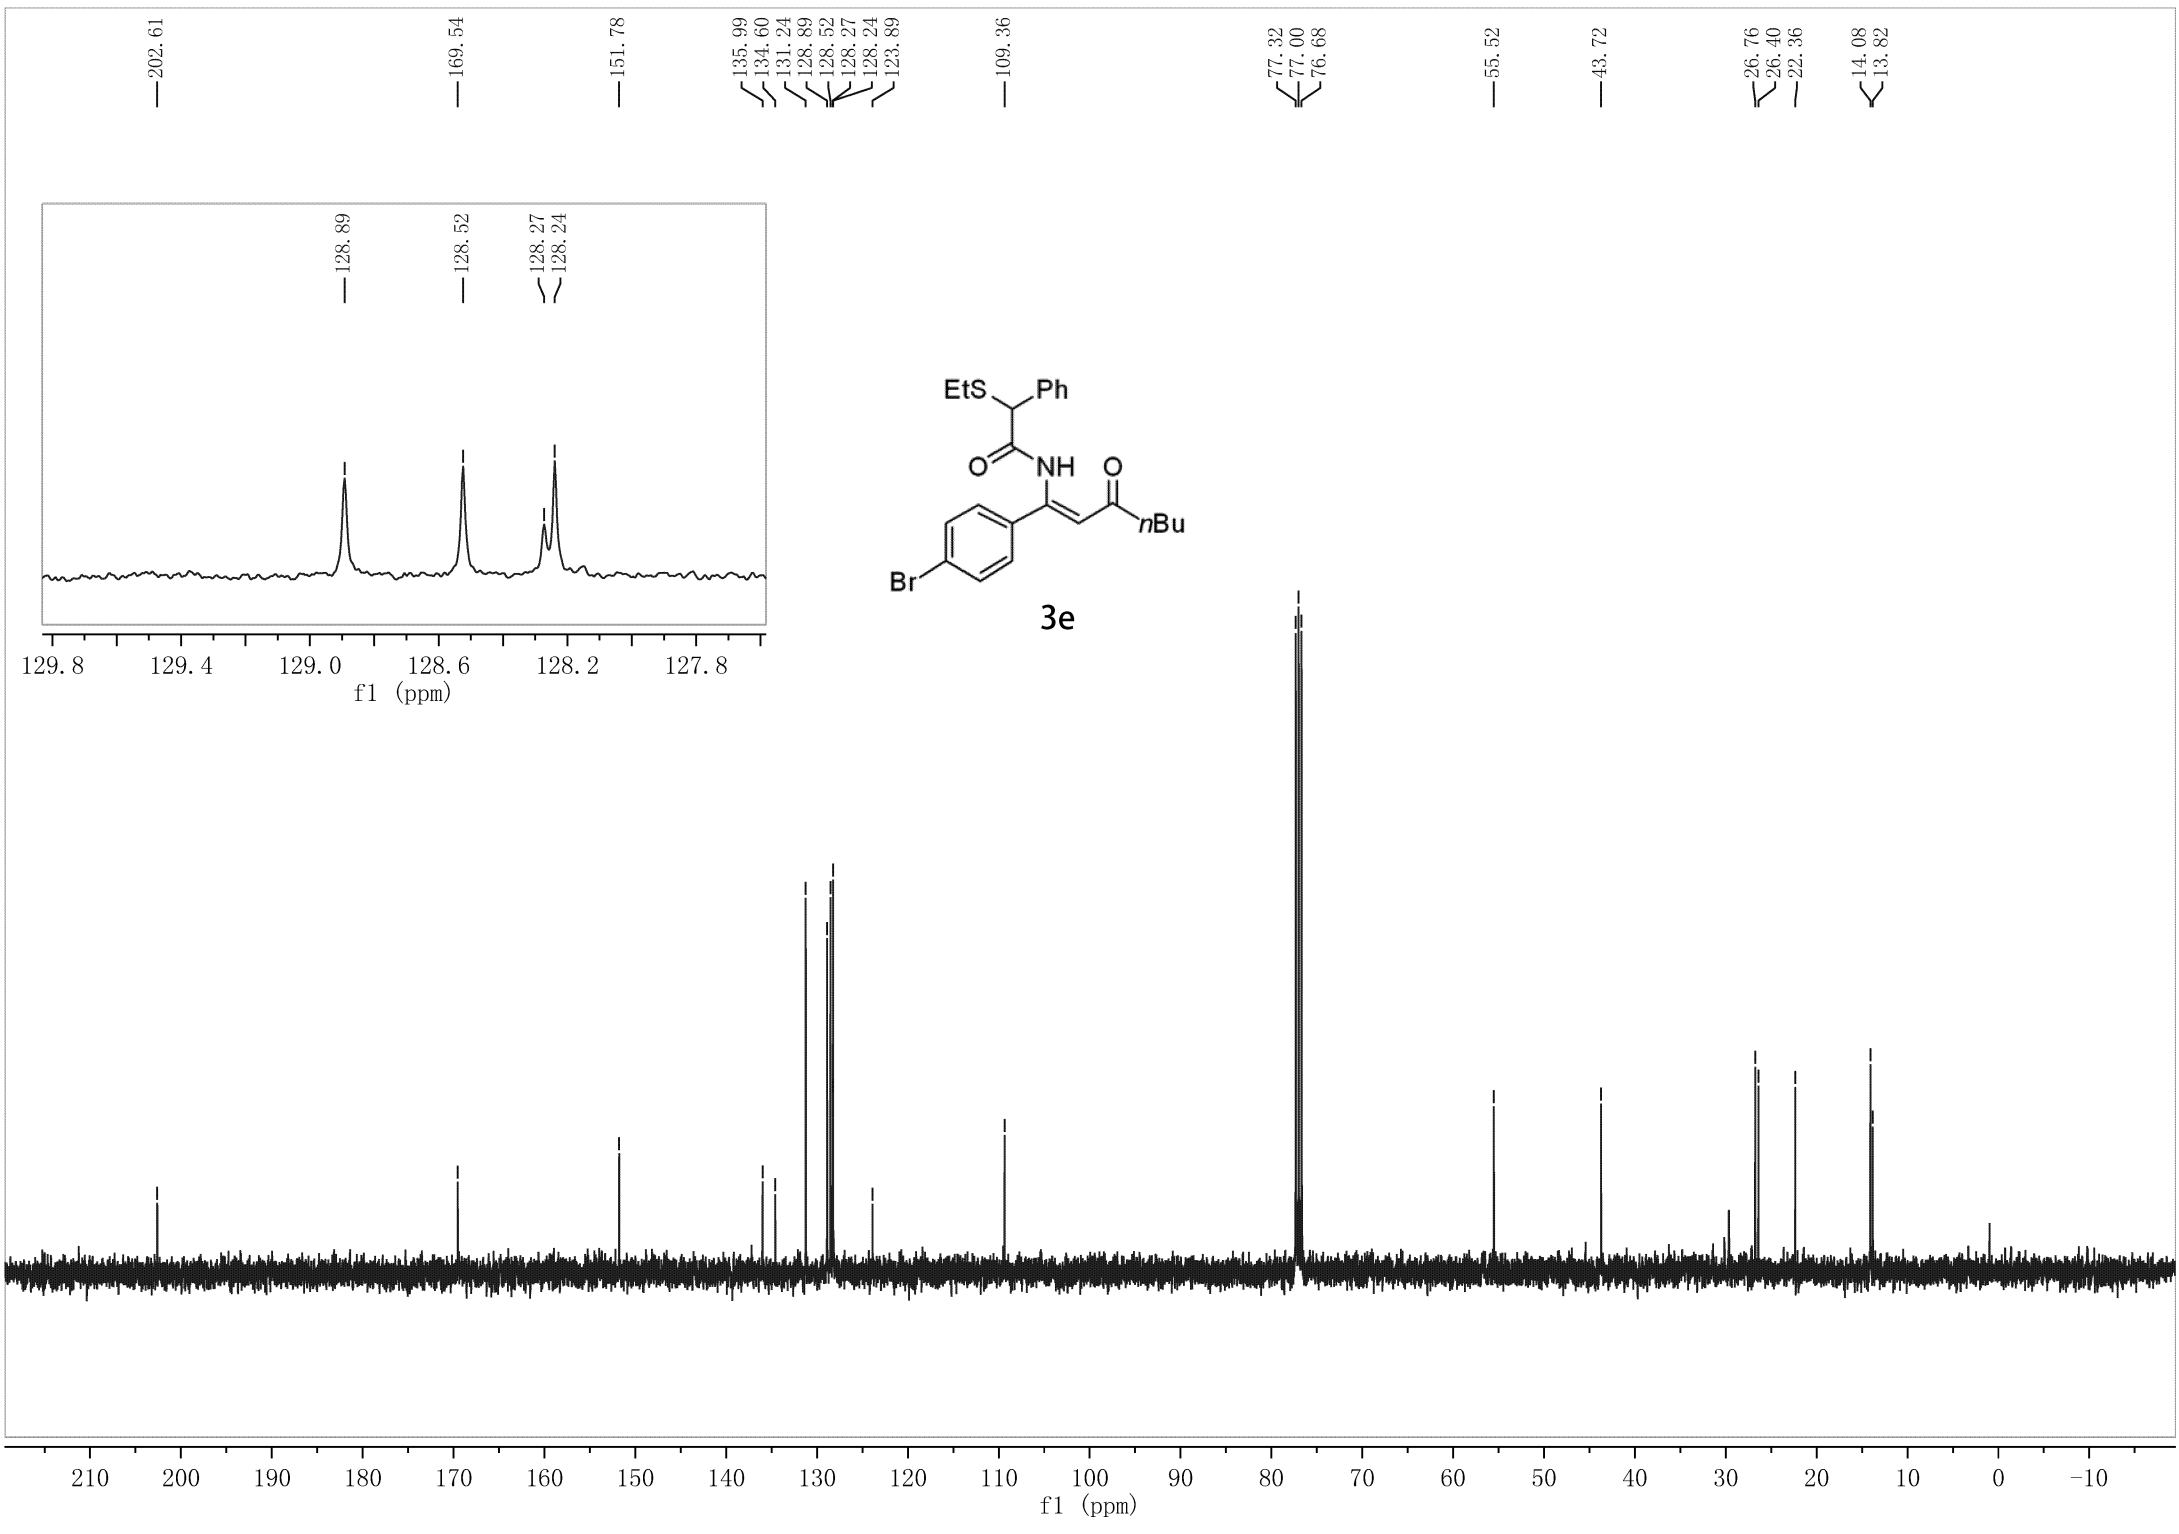



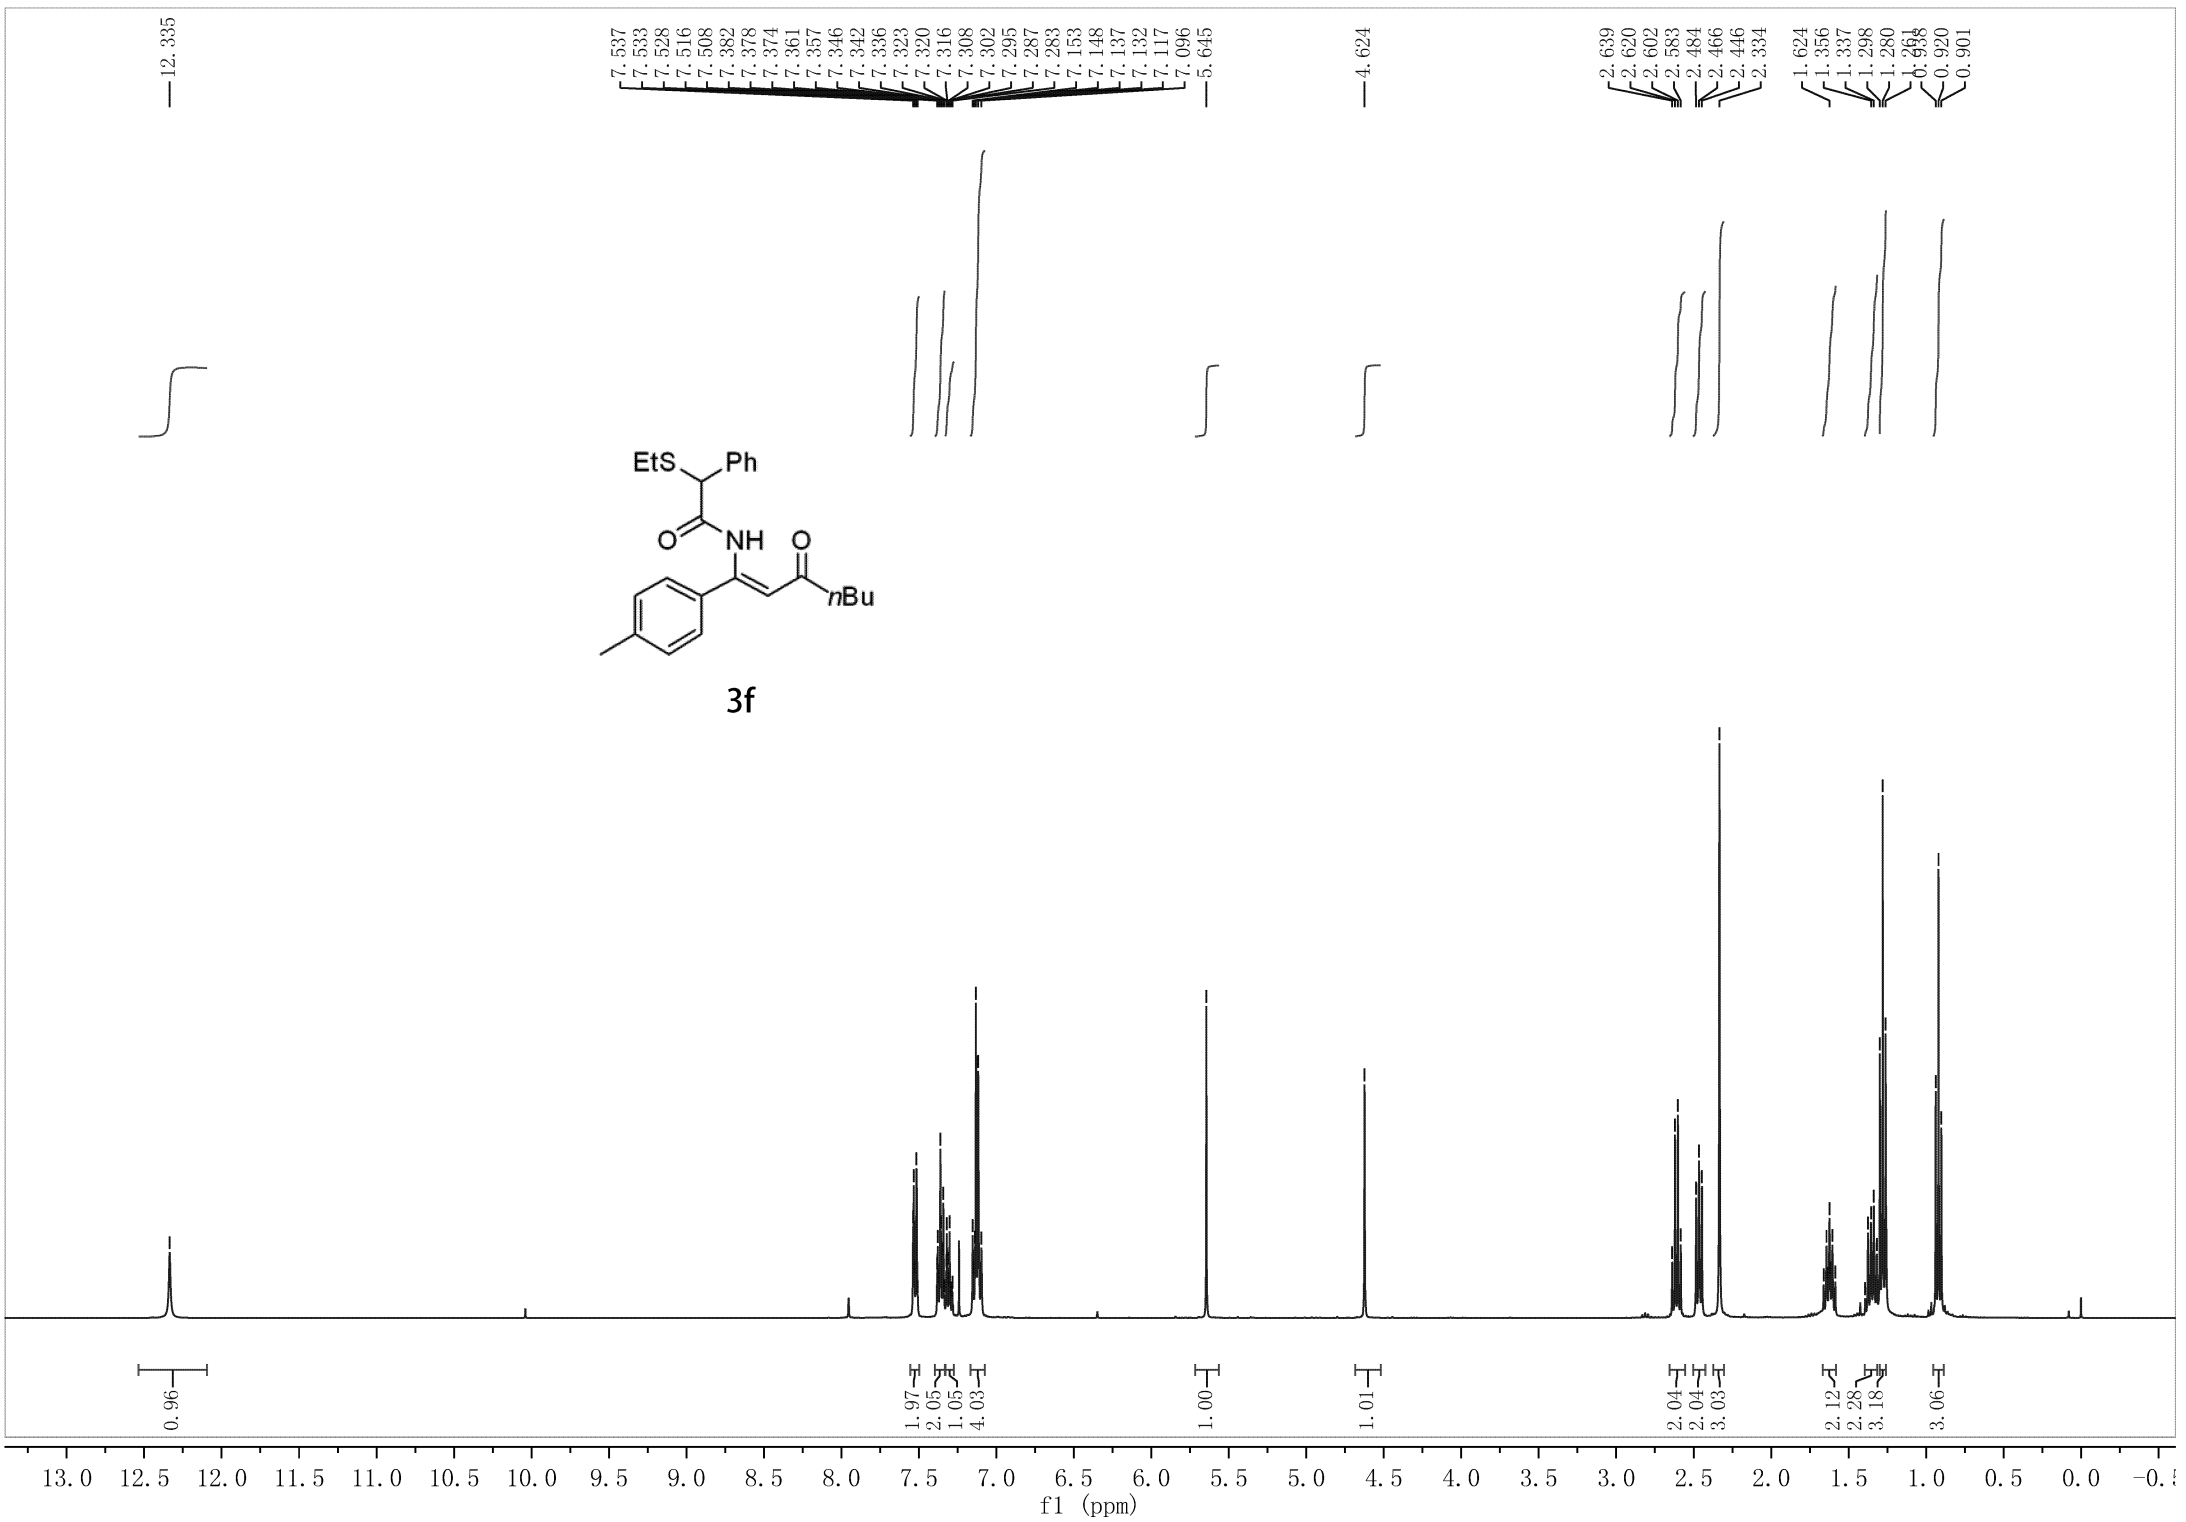

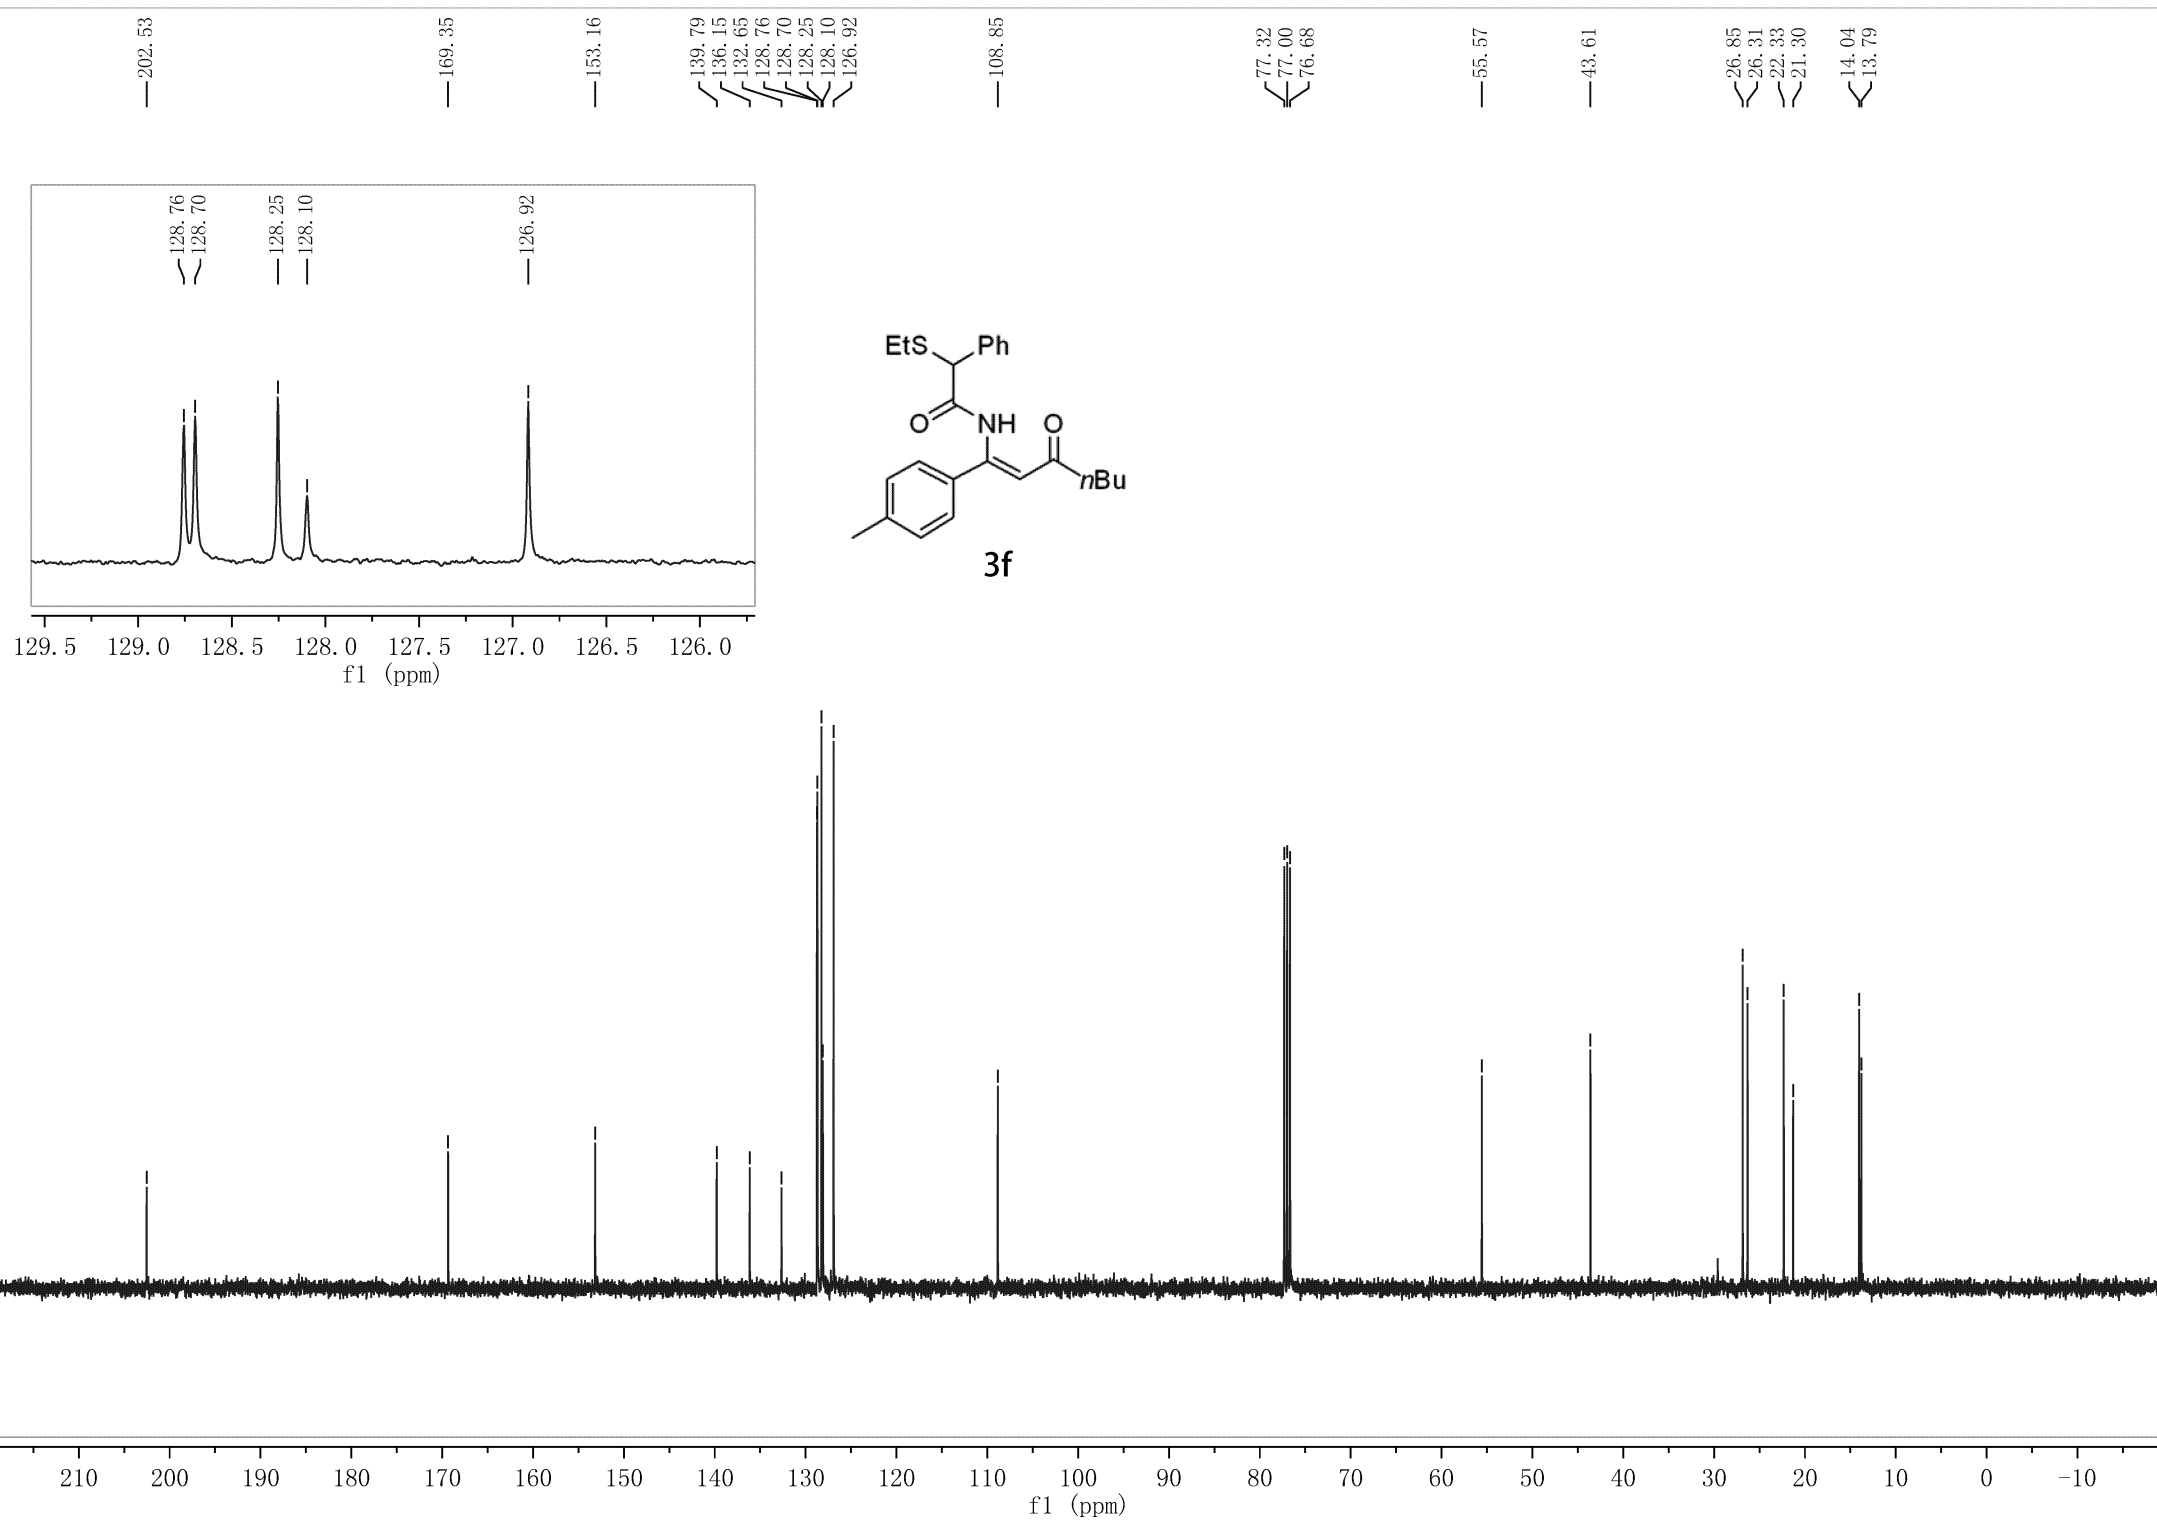

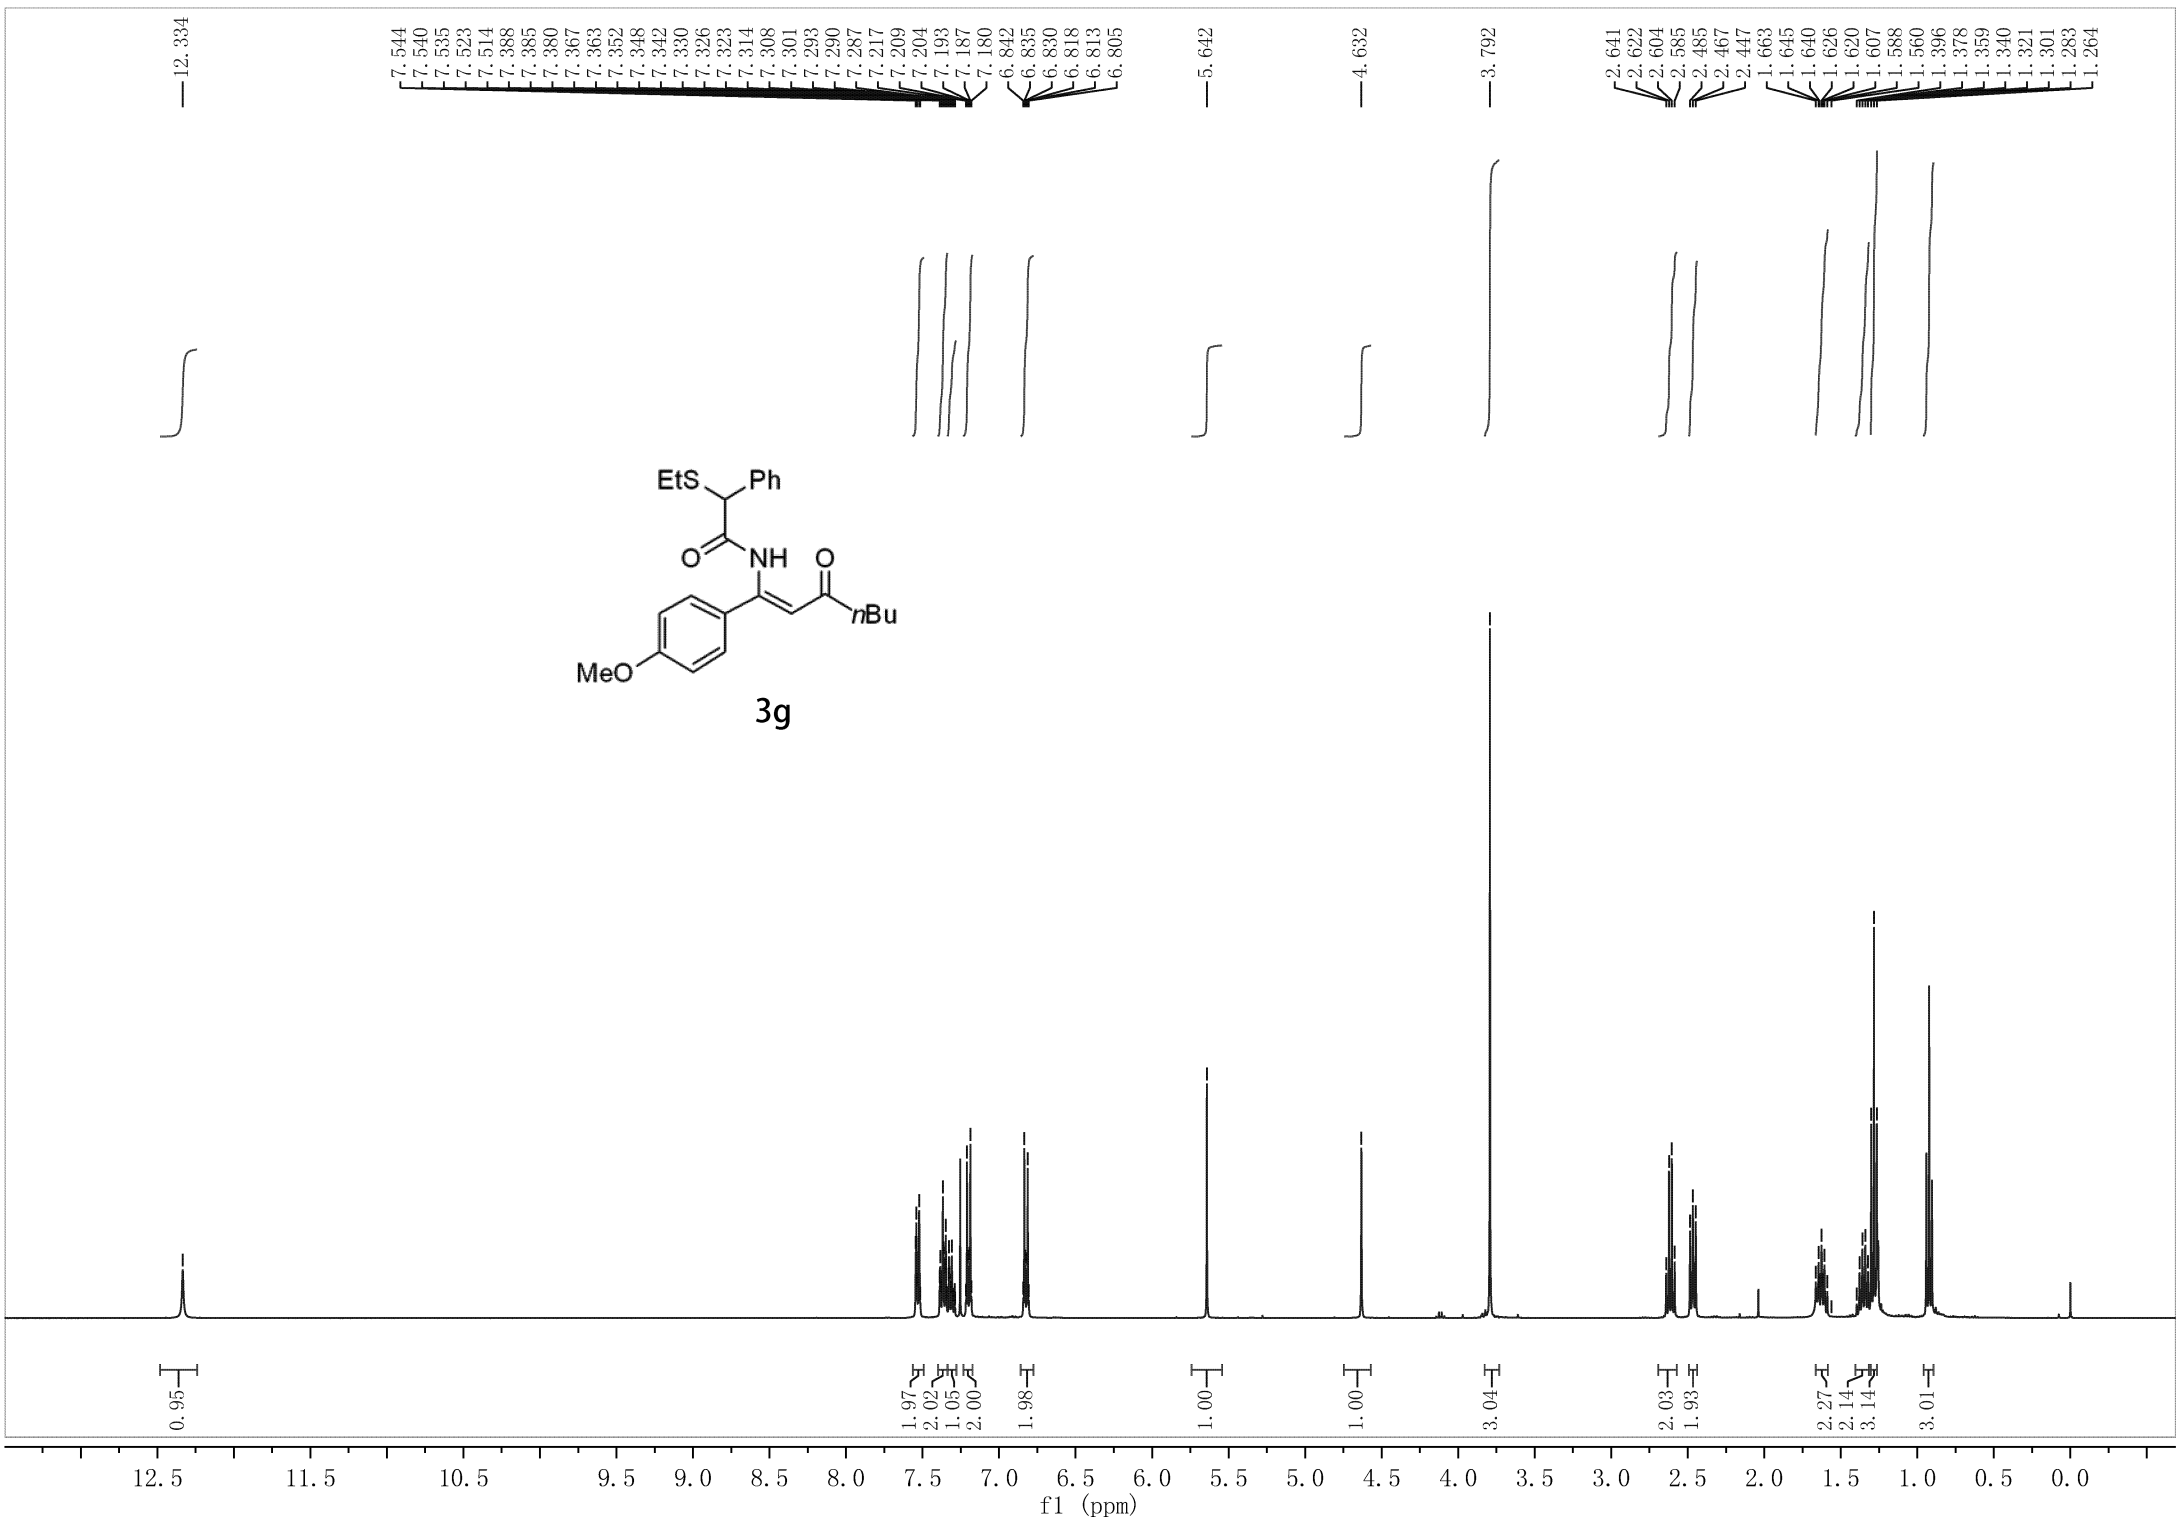

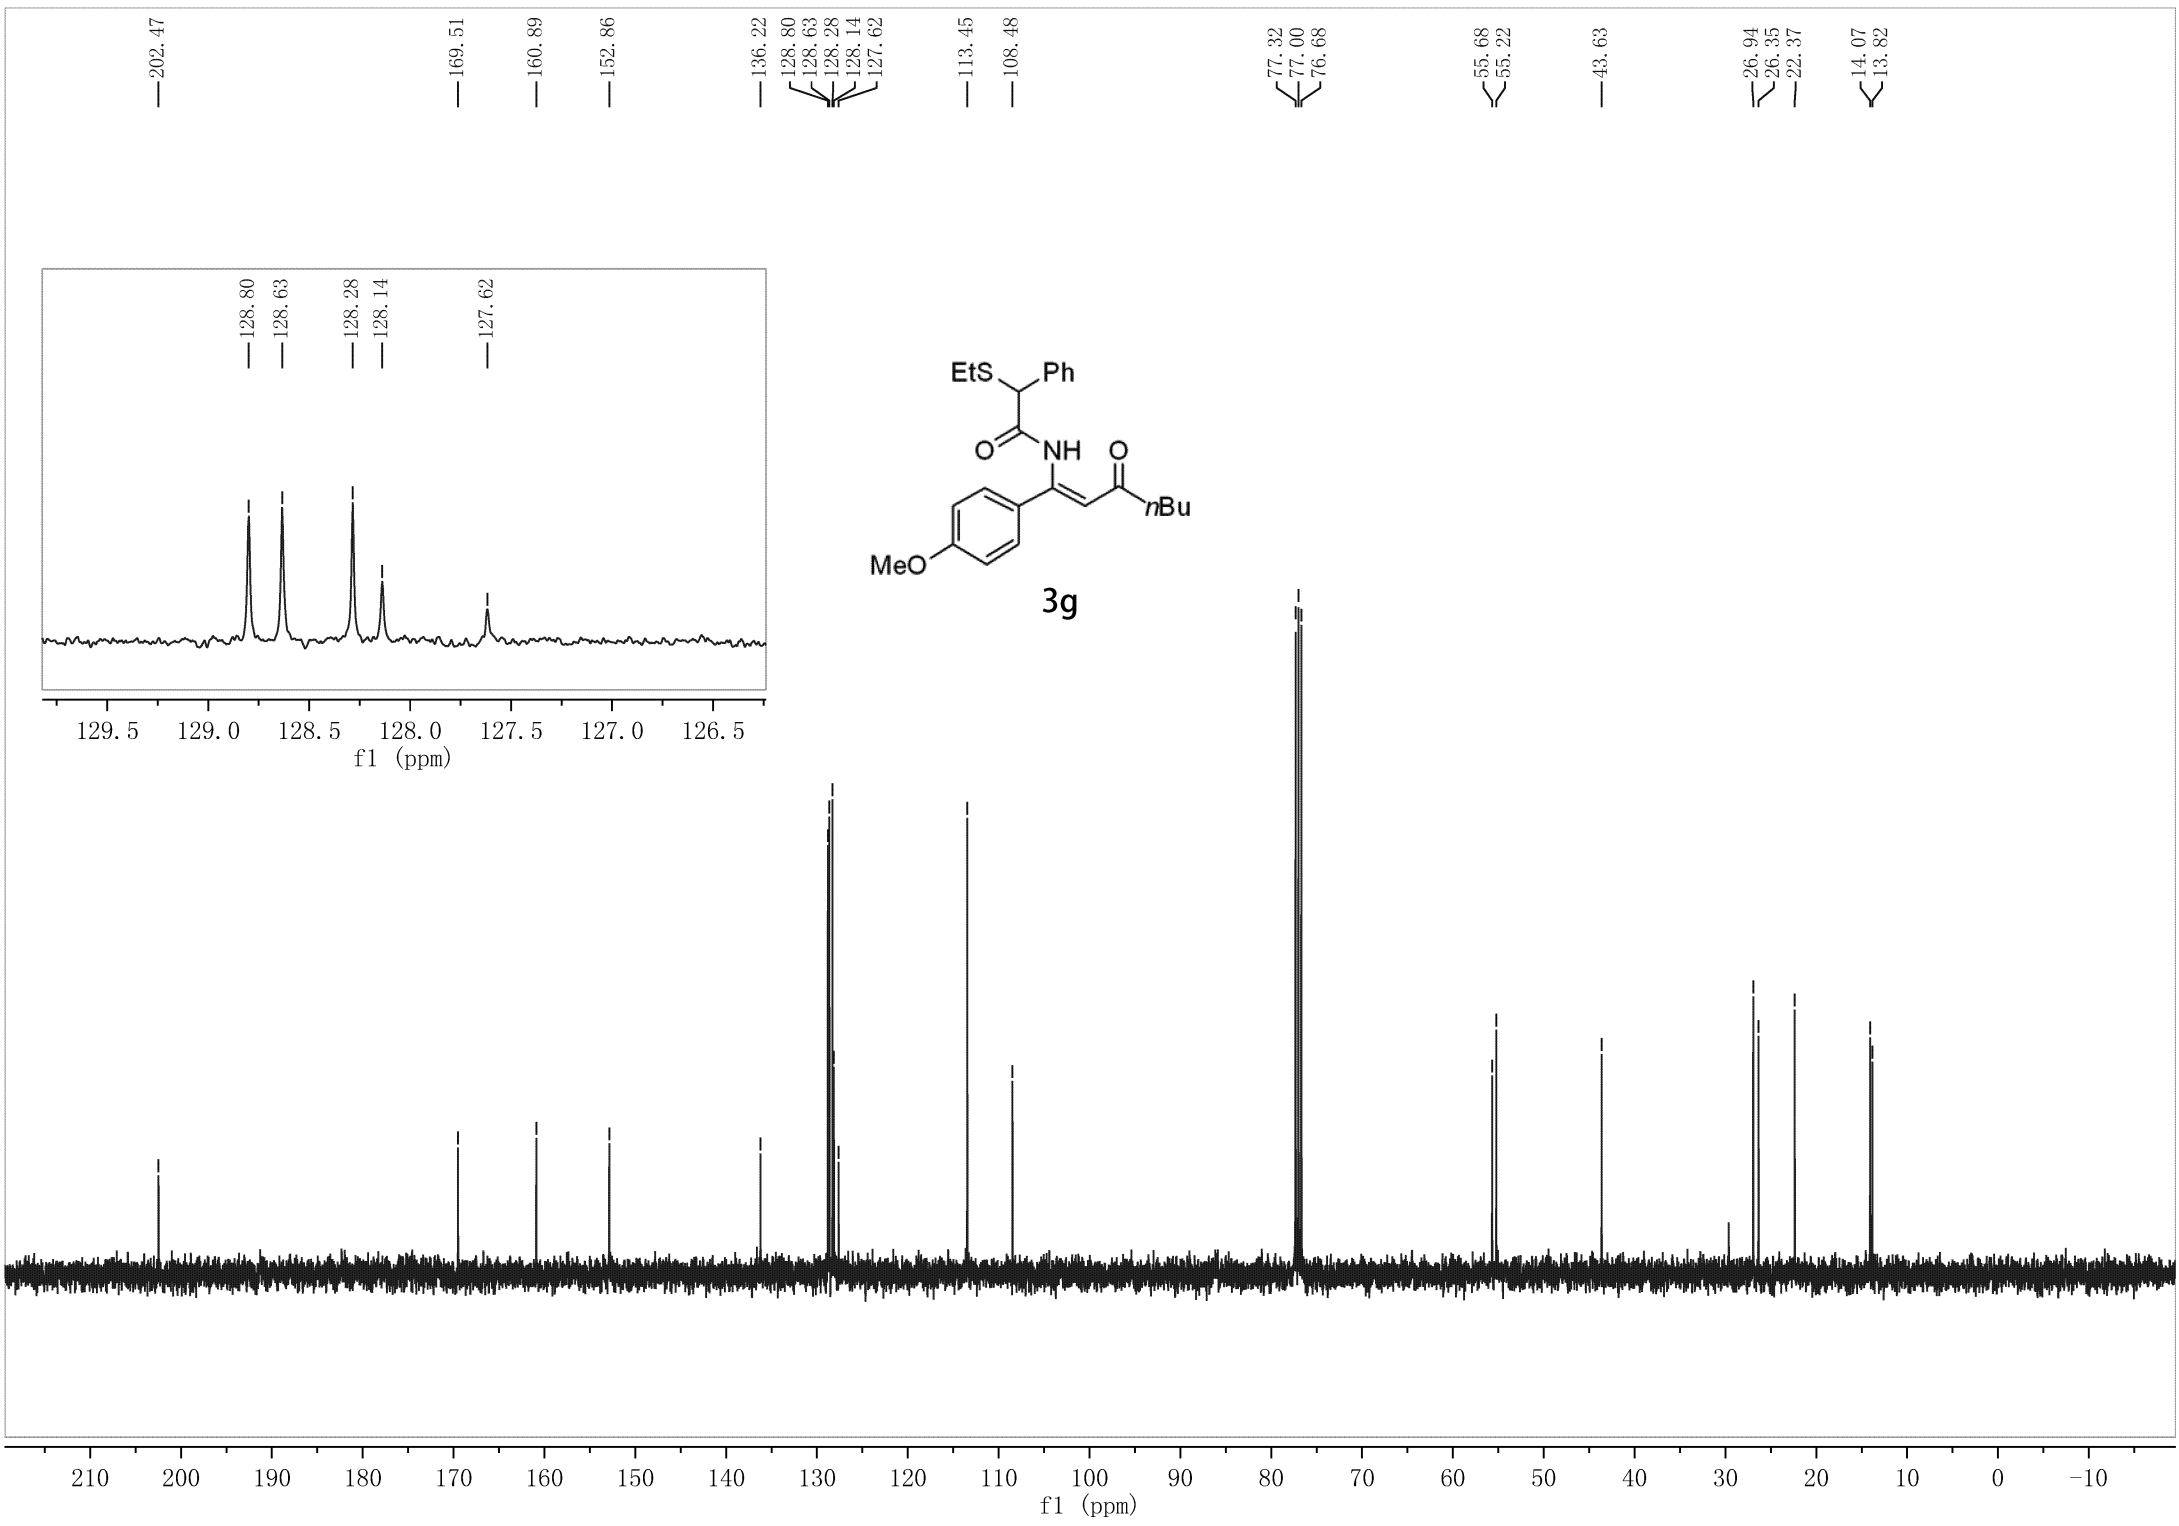

—12.265

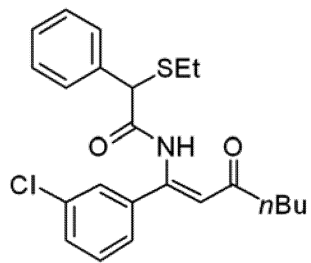

3h

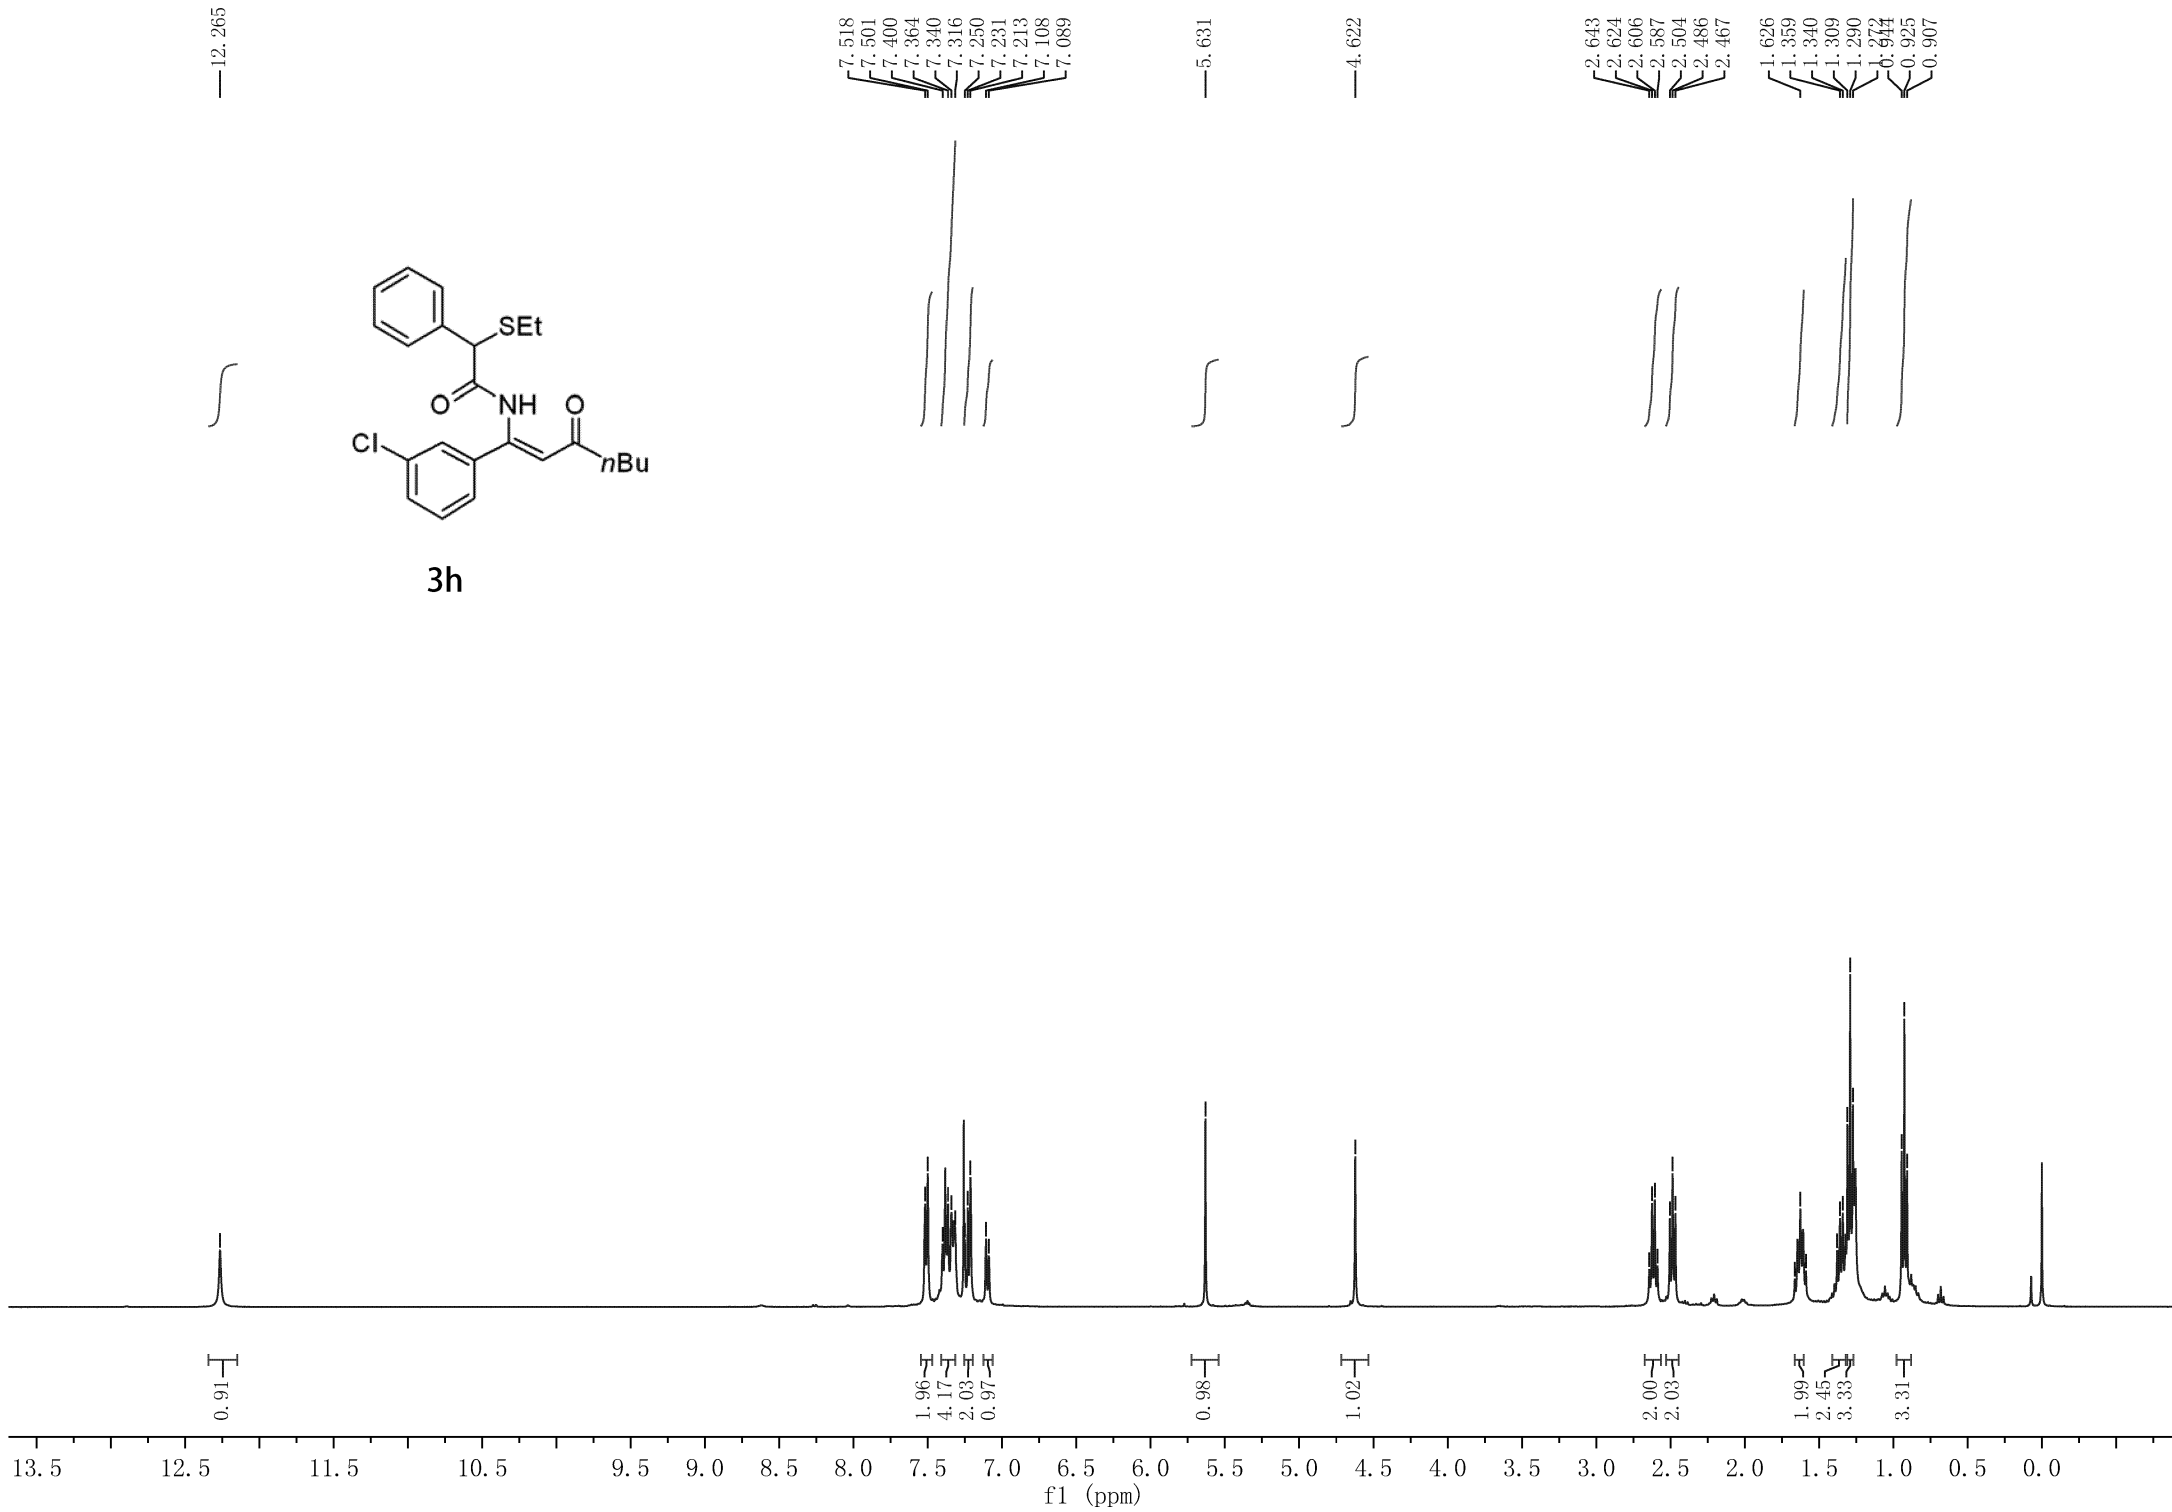

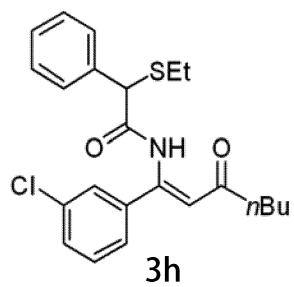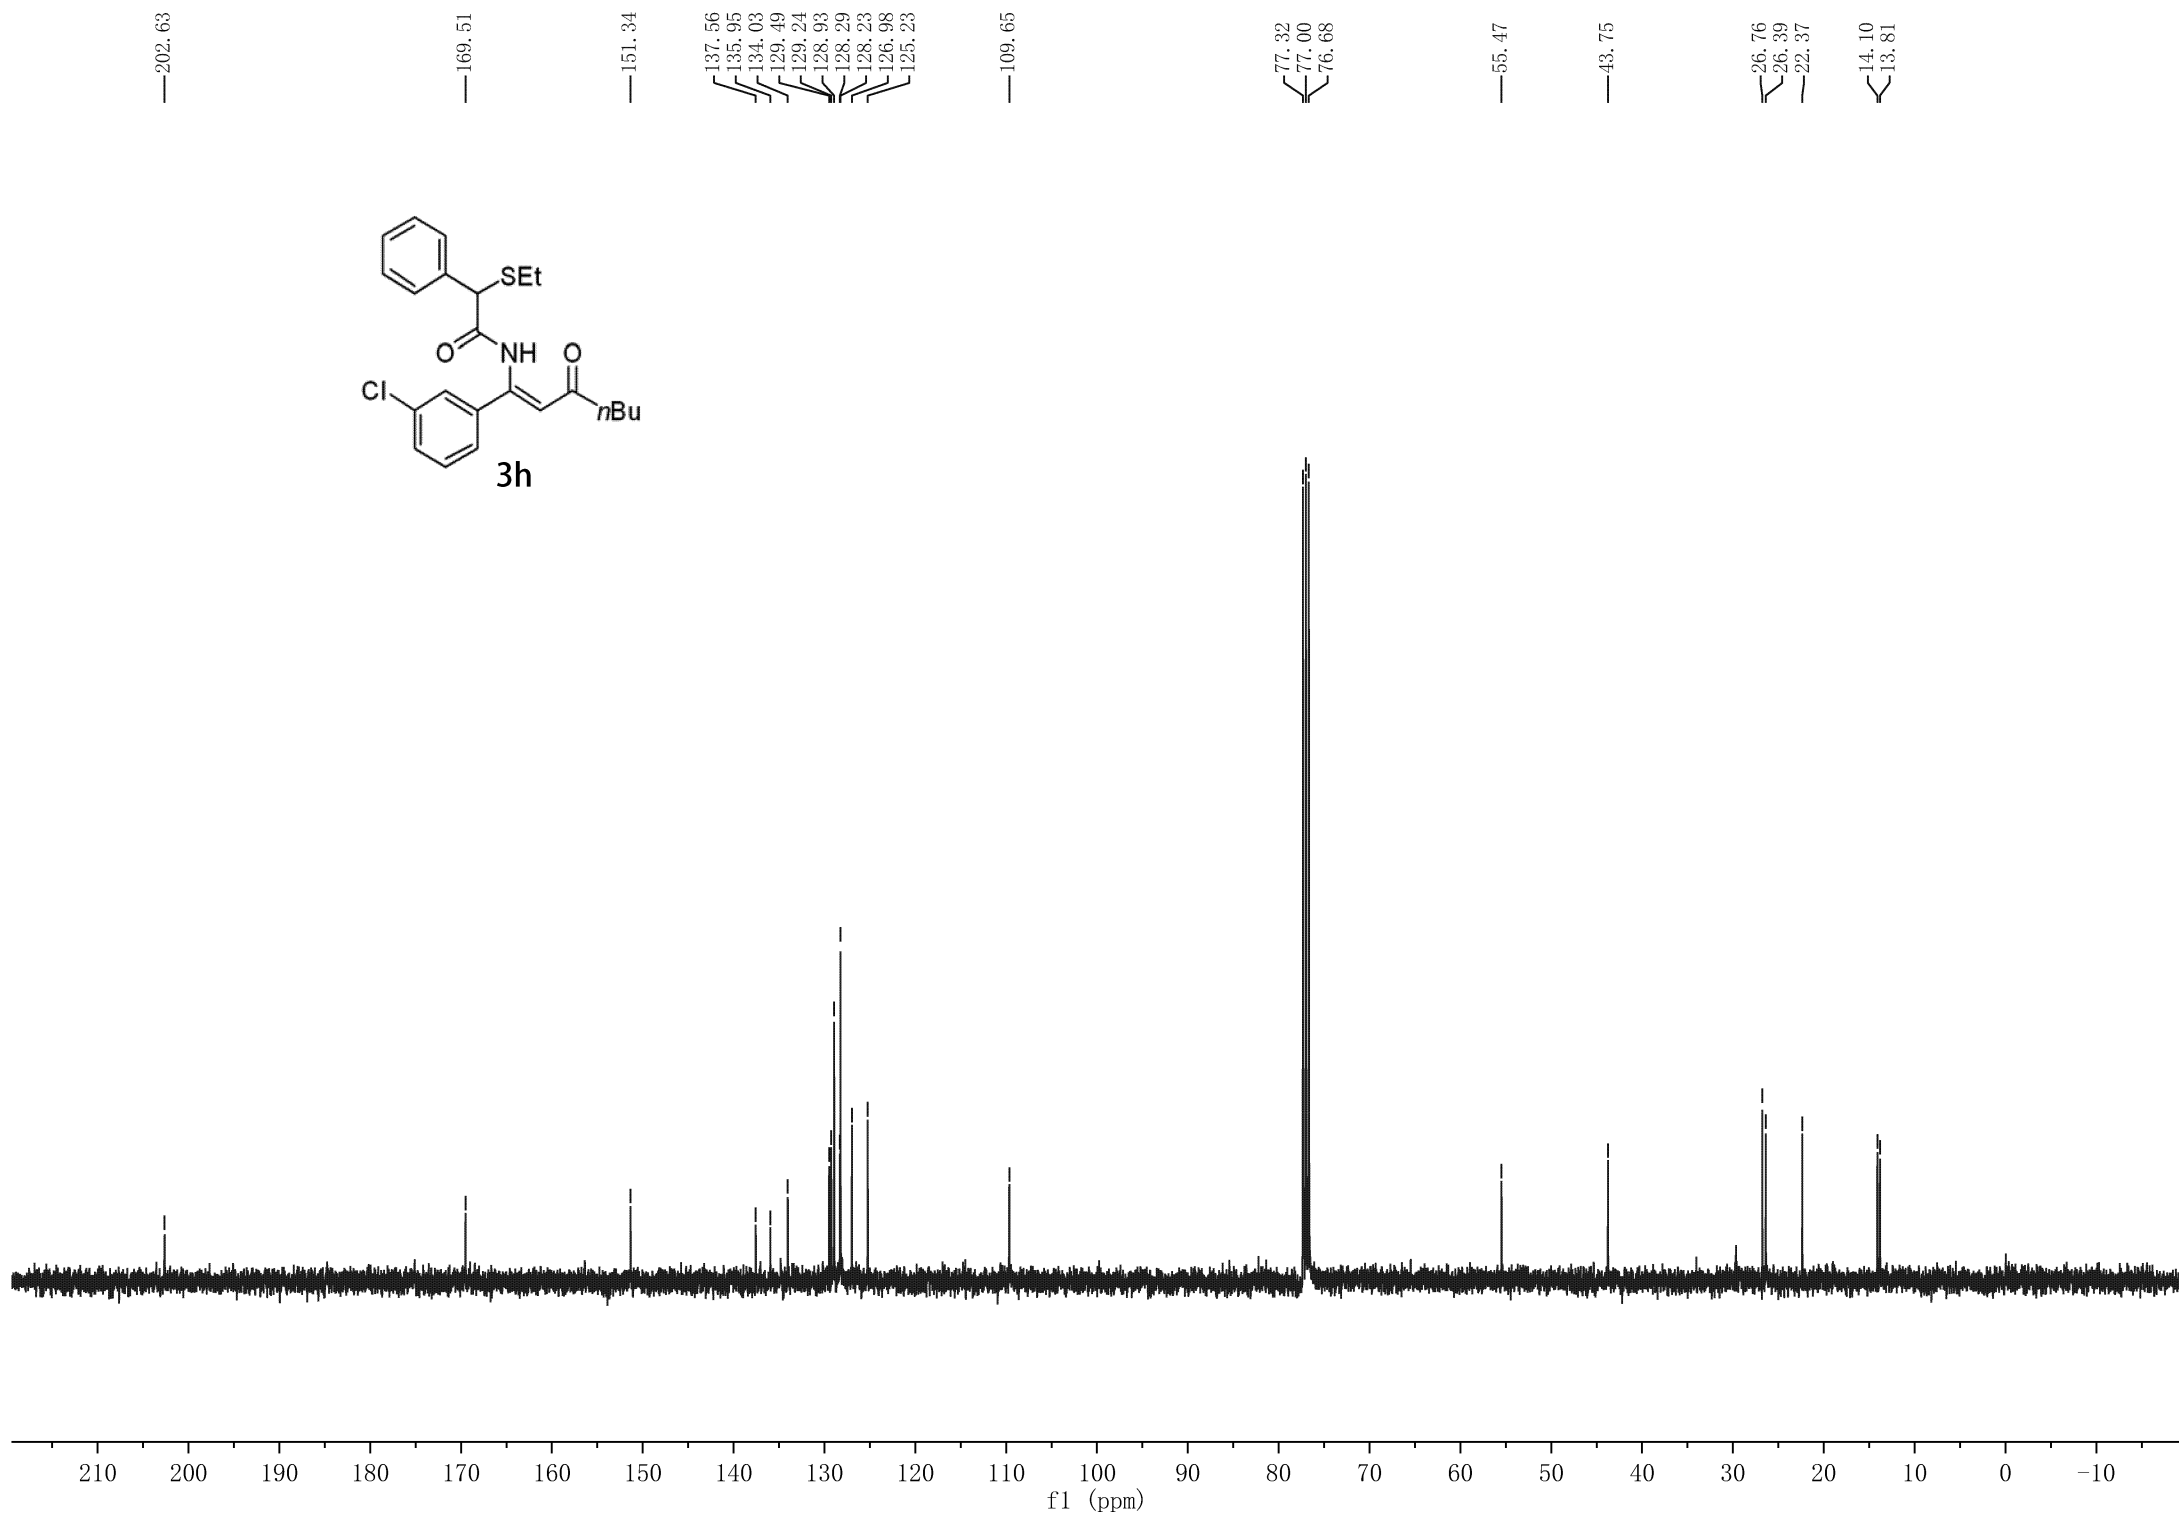

—12.286

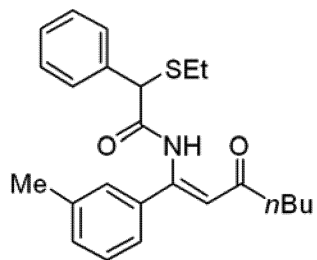

3i

7.533  
7.517  
7.385  
7.356  
7.329  
7.300  
7.207  
7.176  
7.158  
7.047  
7.033  
7.015

—5.649

—4.626

2.643  
2.628  
2.613  
2.599  
2.488  
2.473  
2.458  
2.294  
1.628  
1.358  
1.343  
1.303  
1.289  
0.938  
0.923  
0.908

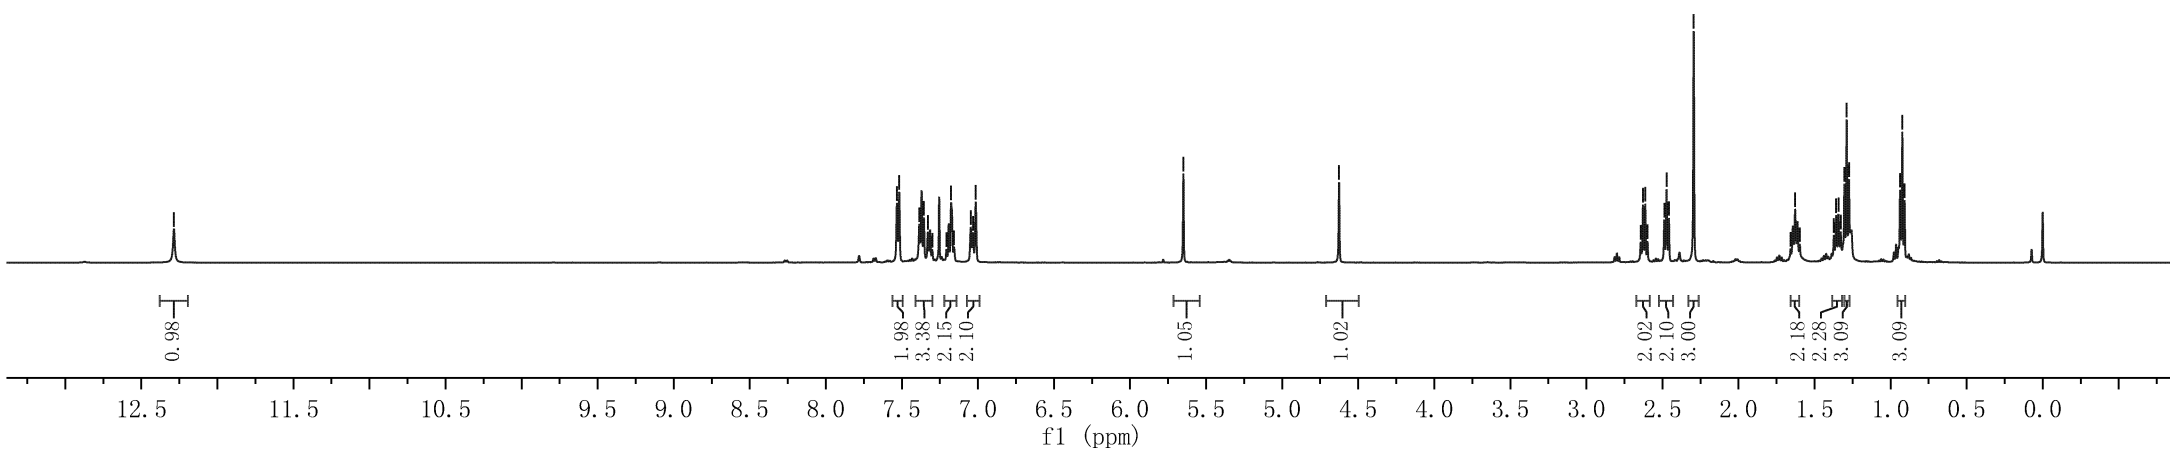

—202.65

—169.42

—153.24

137.66  
136.18  
135.63  
130.40  
128.82  
128.30  
128.18  
127.91  
127.51  
124.15

—109.23

77.25  
77.00  
76.75

—55.59

—43.70

26.89  
26.36  
22.40  
21.34

14.11  
13.83

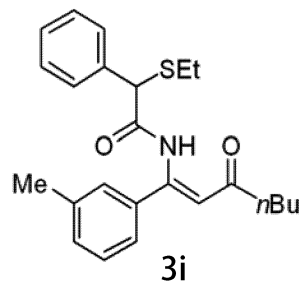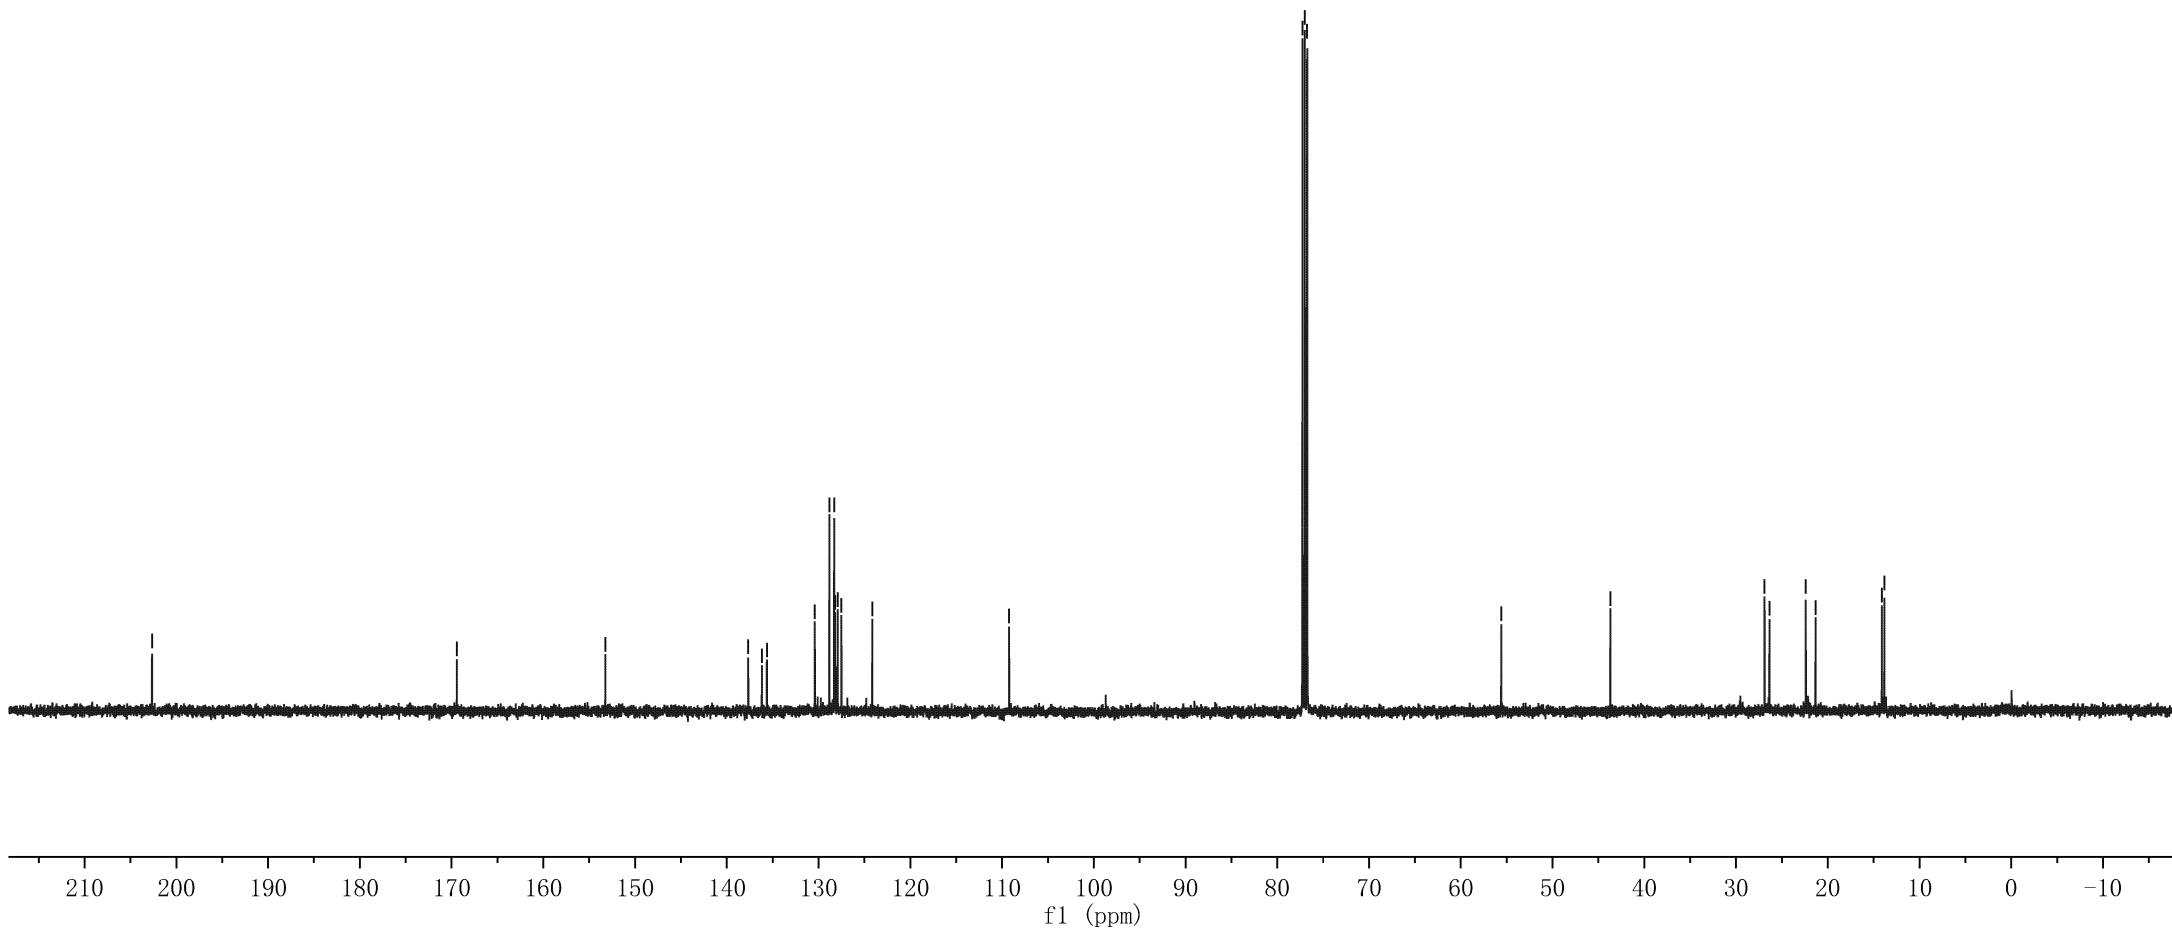



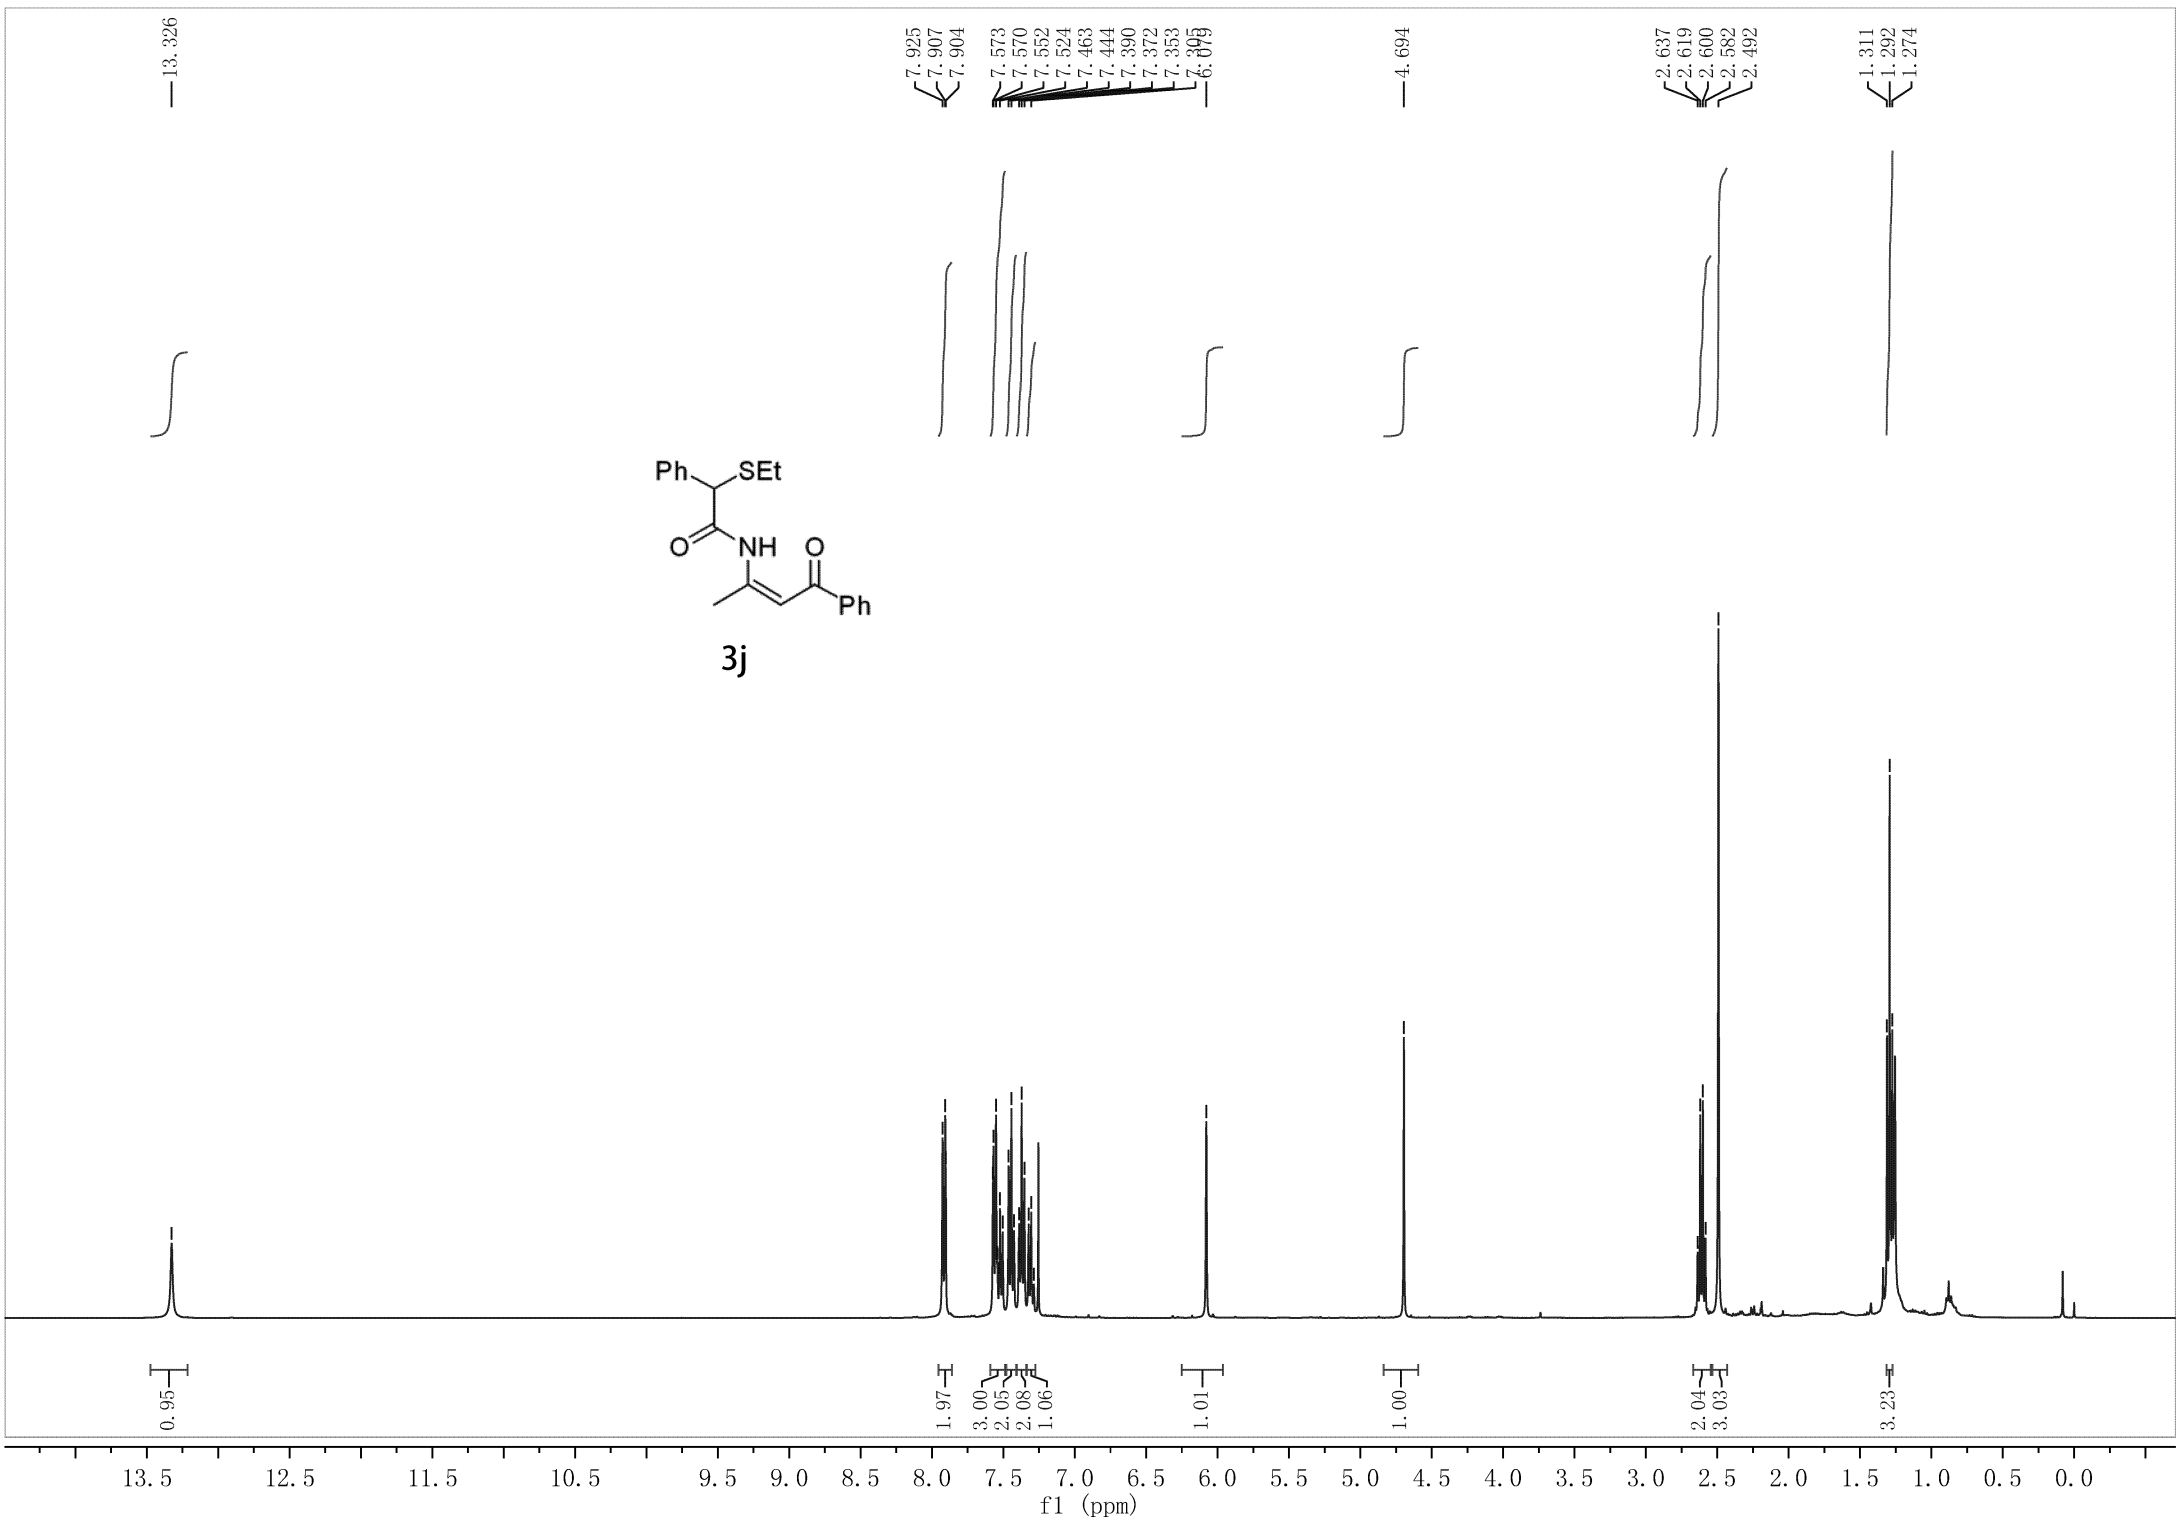

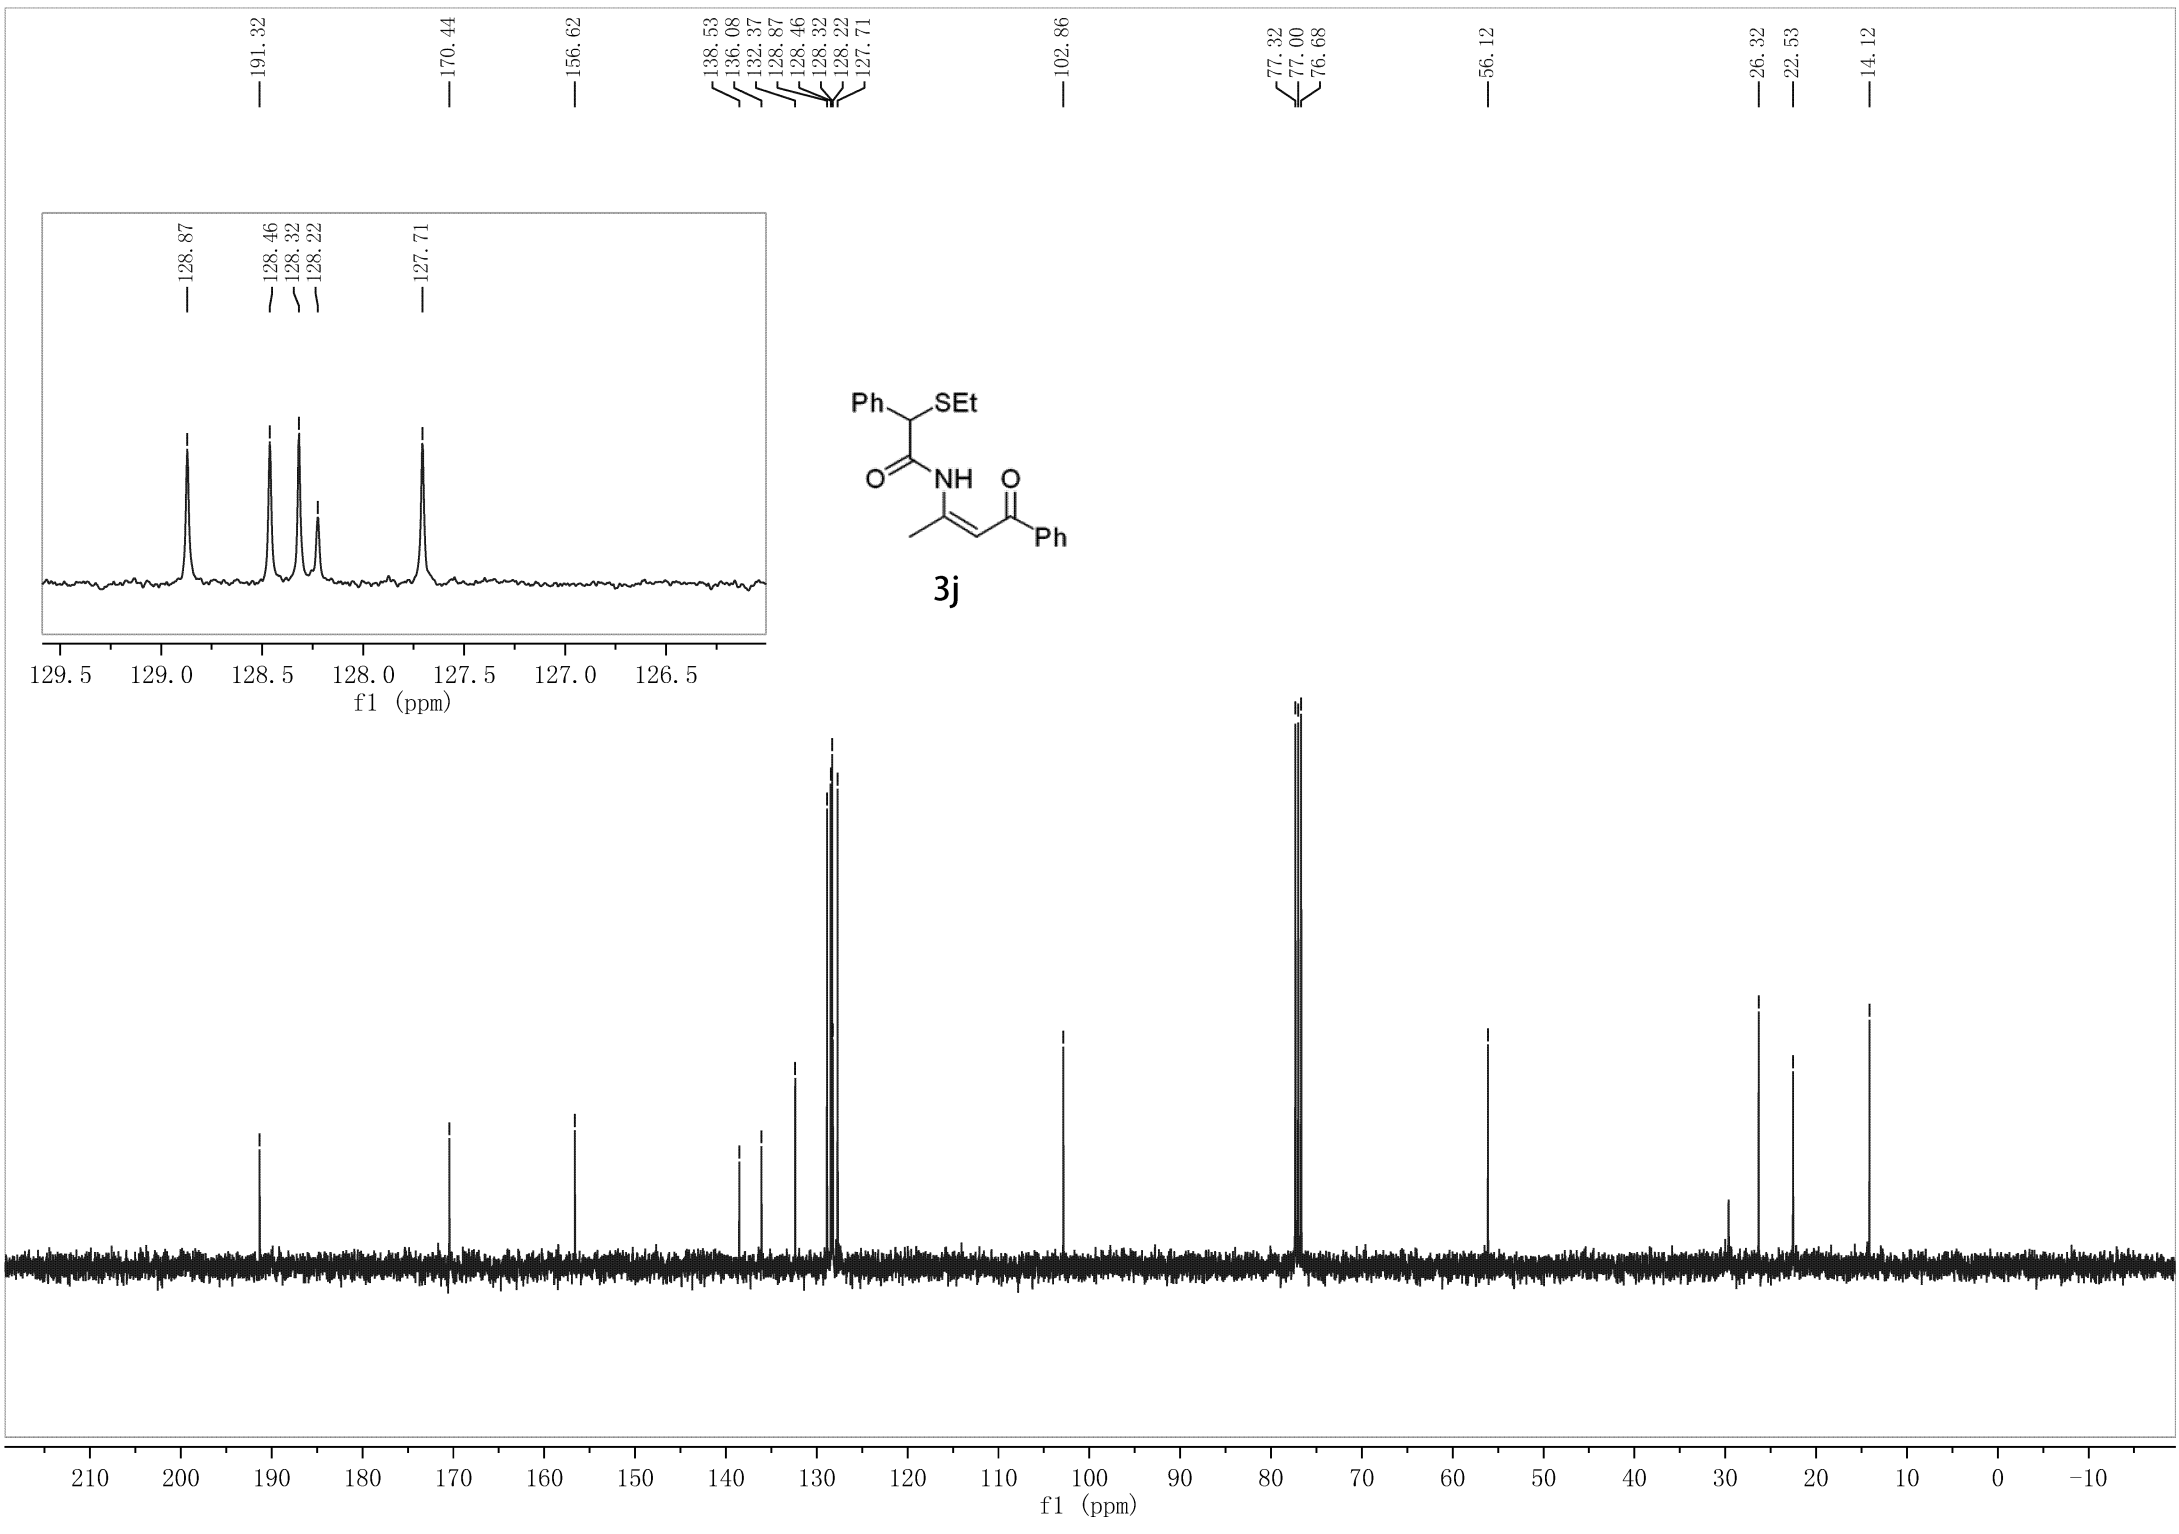

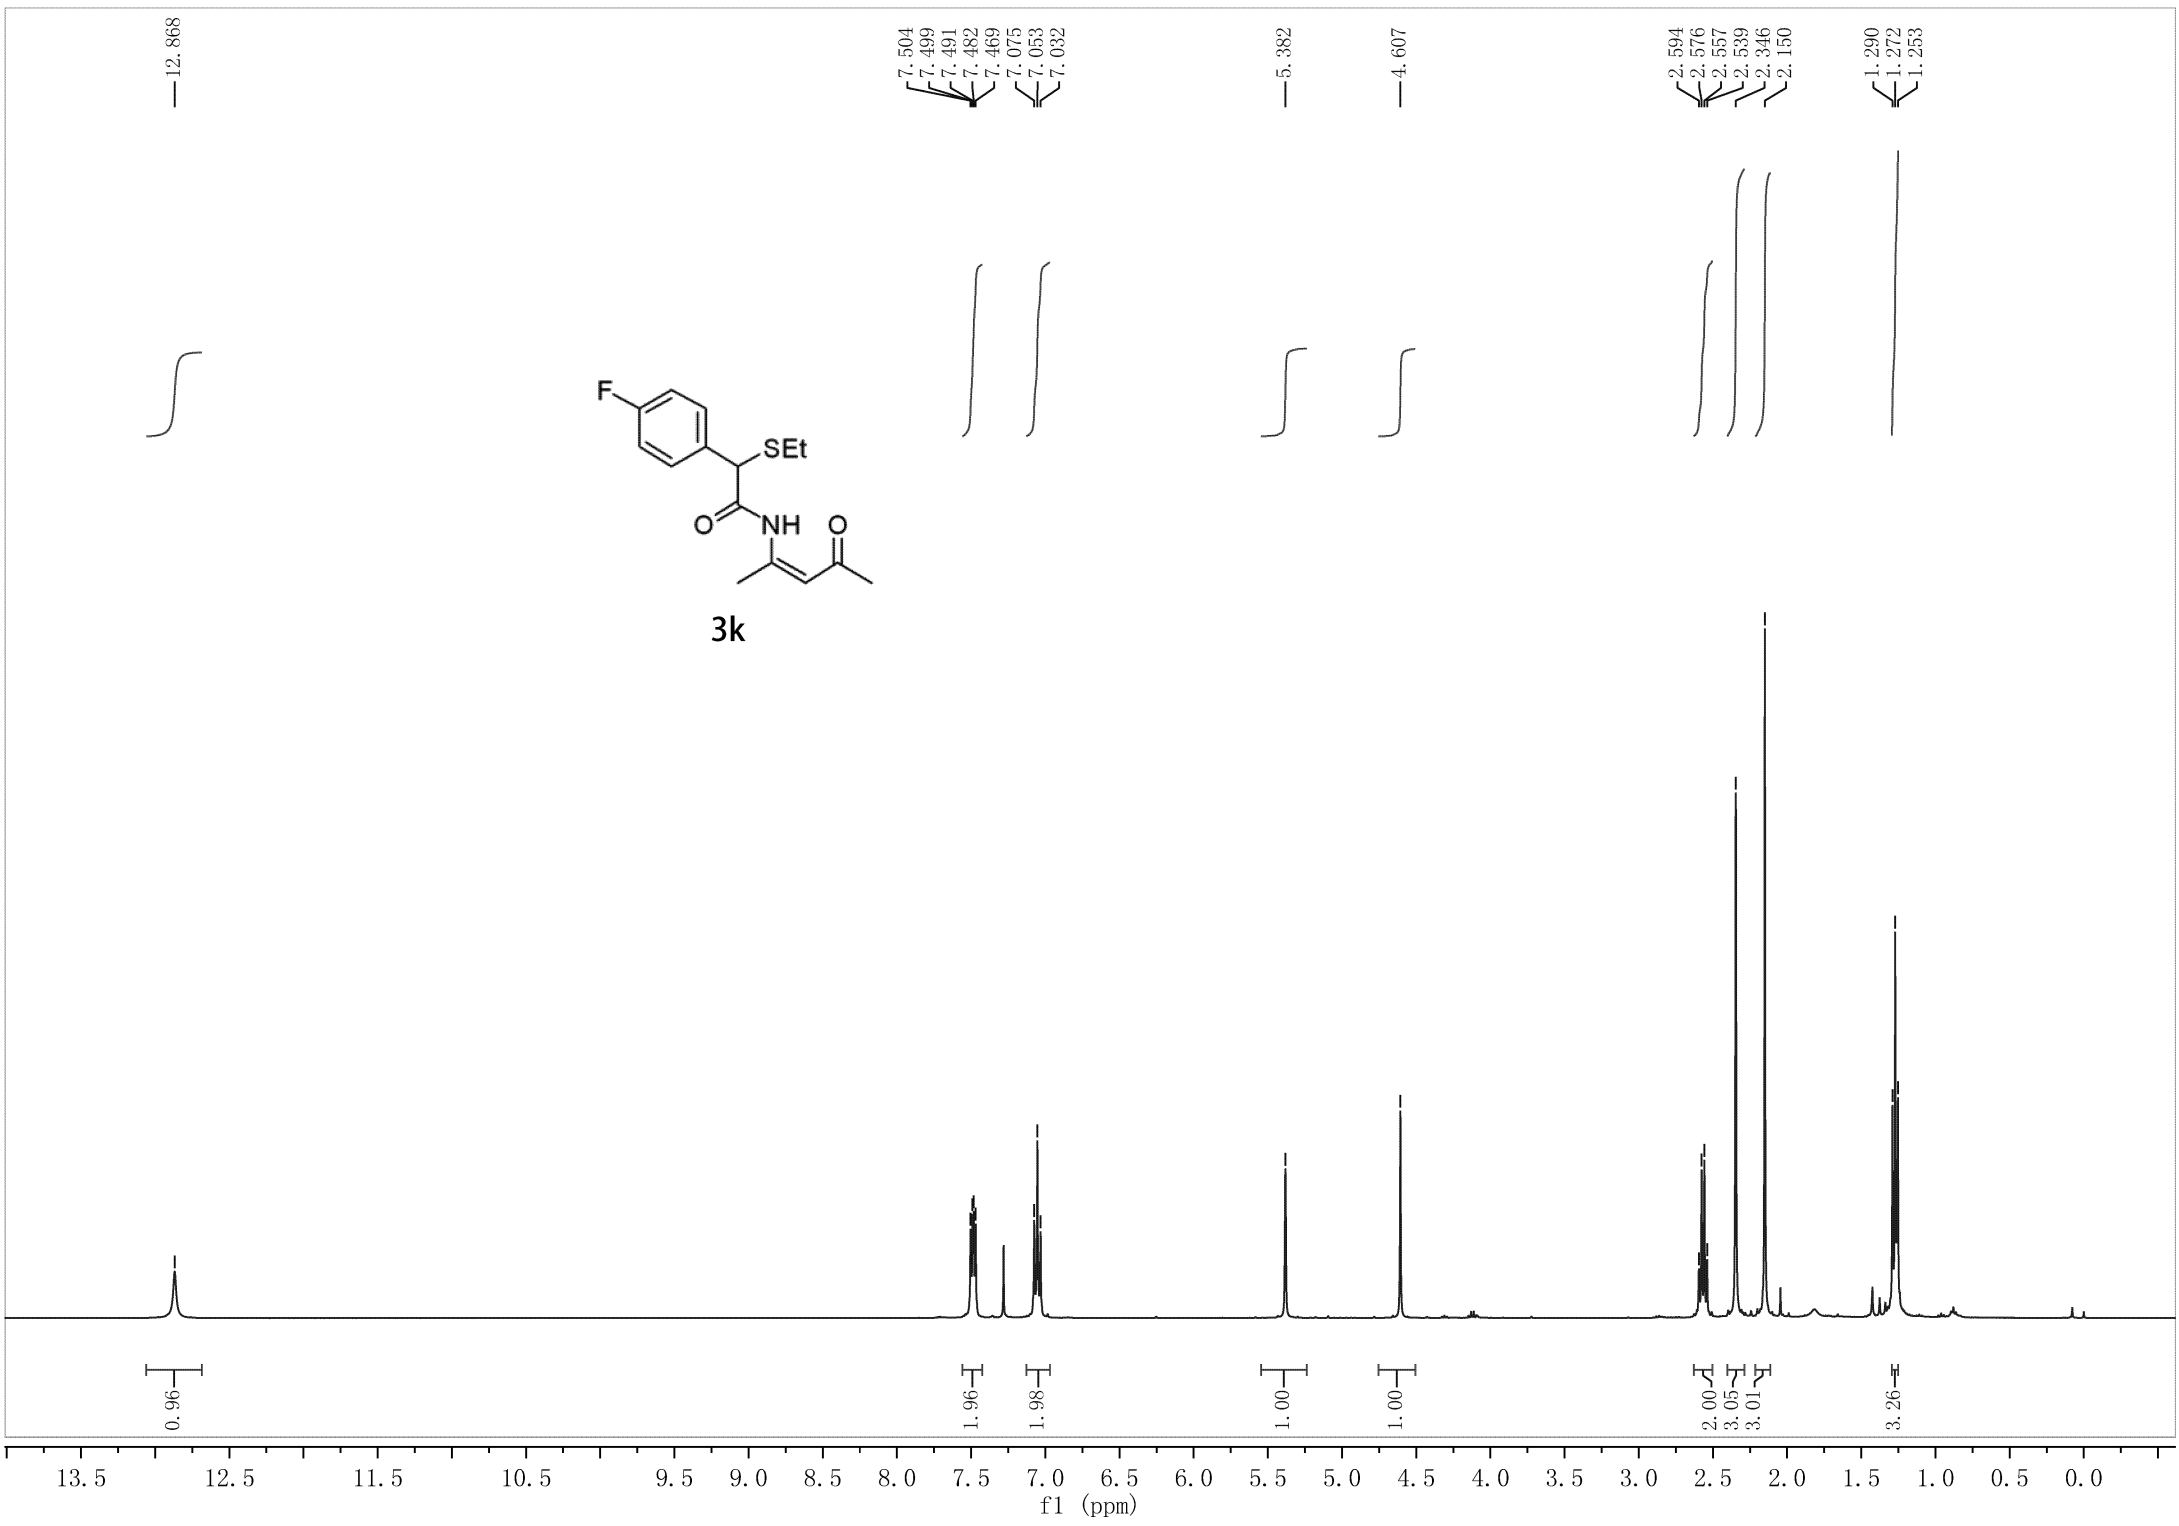

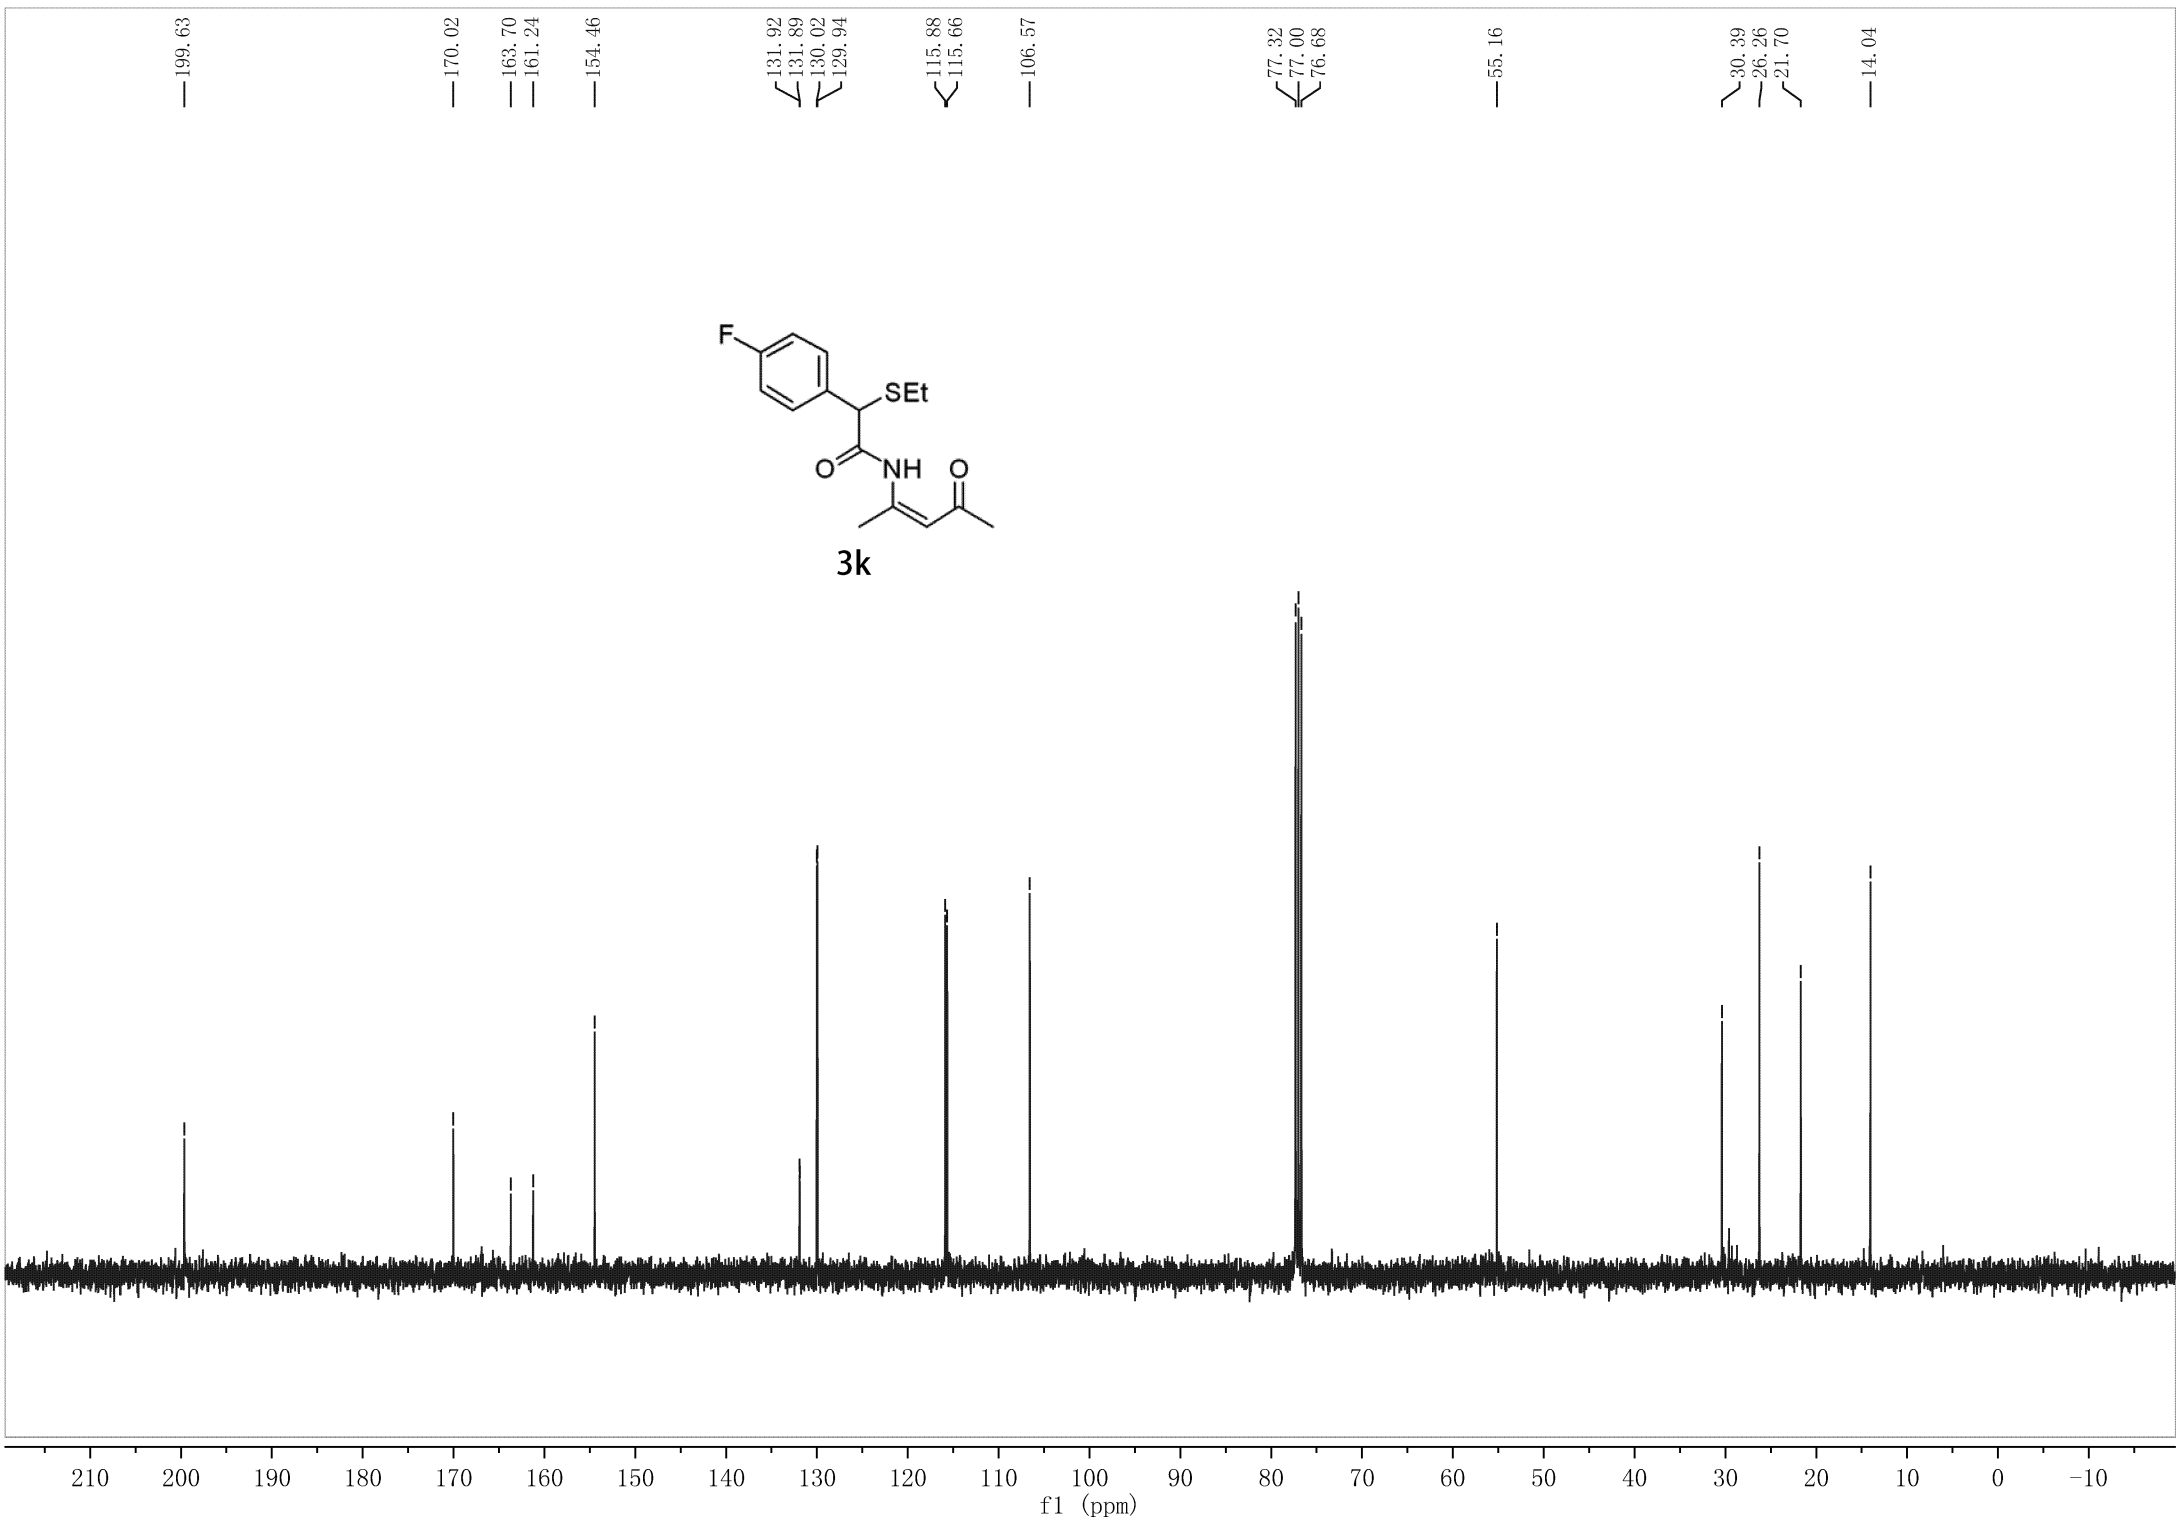

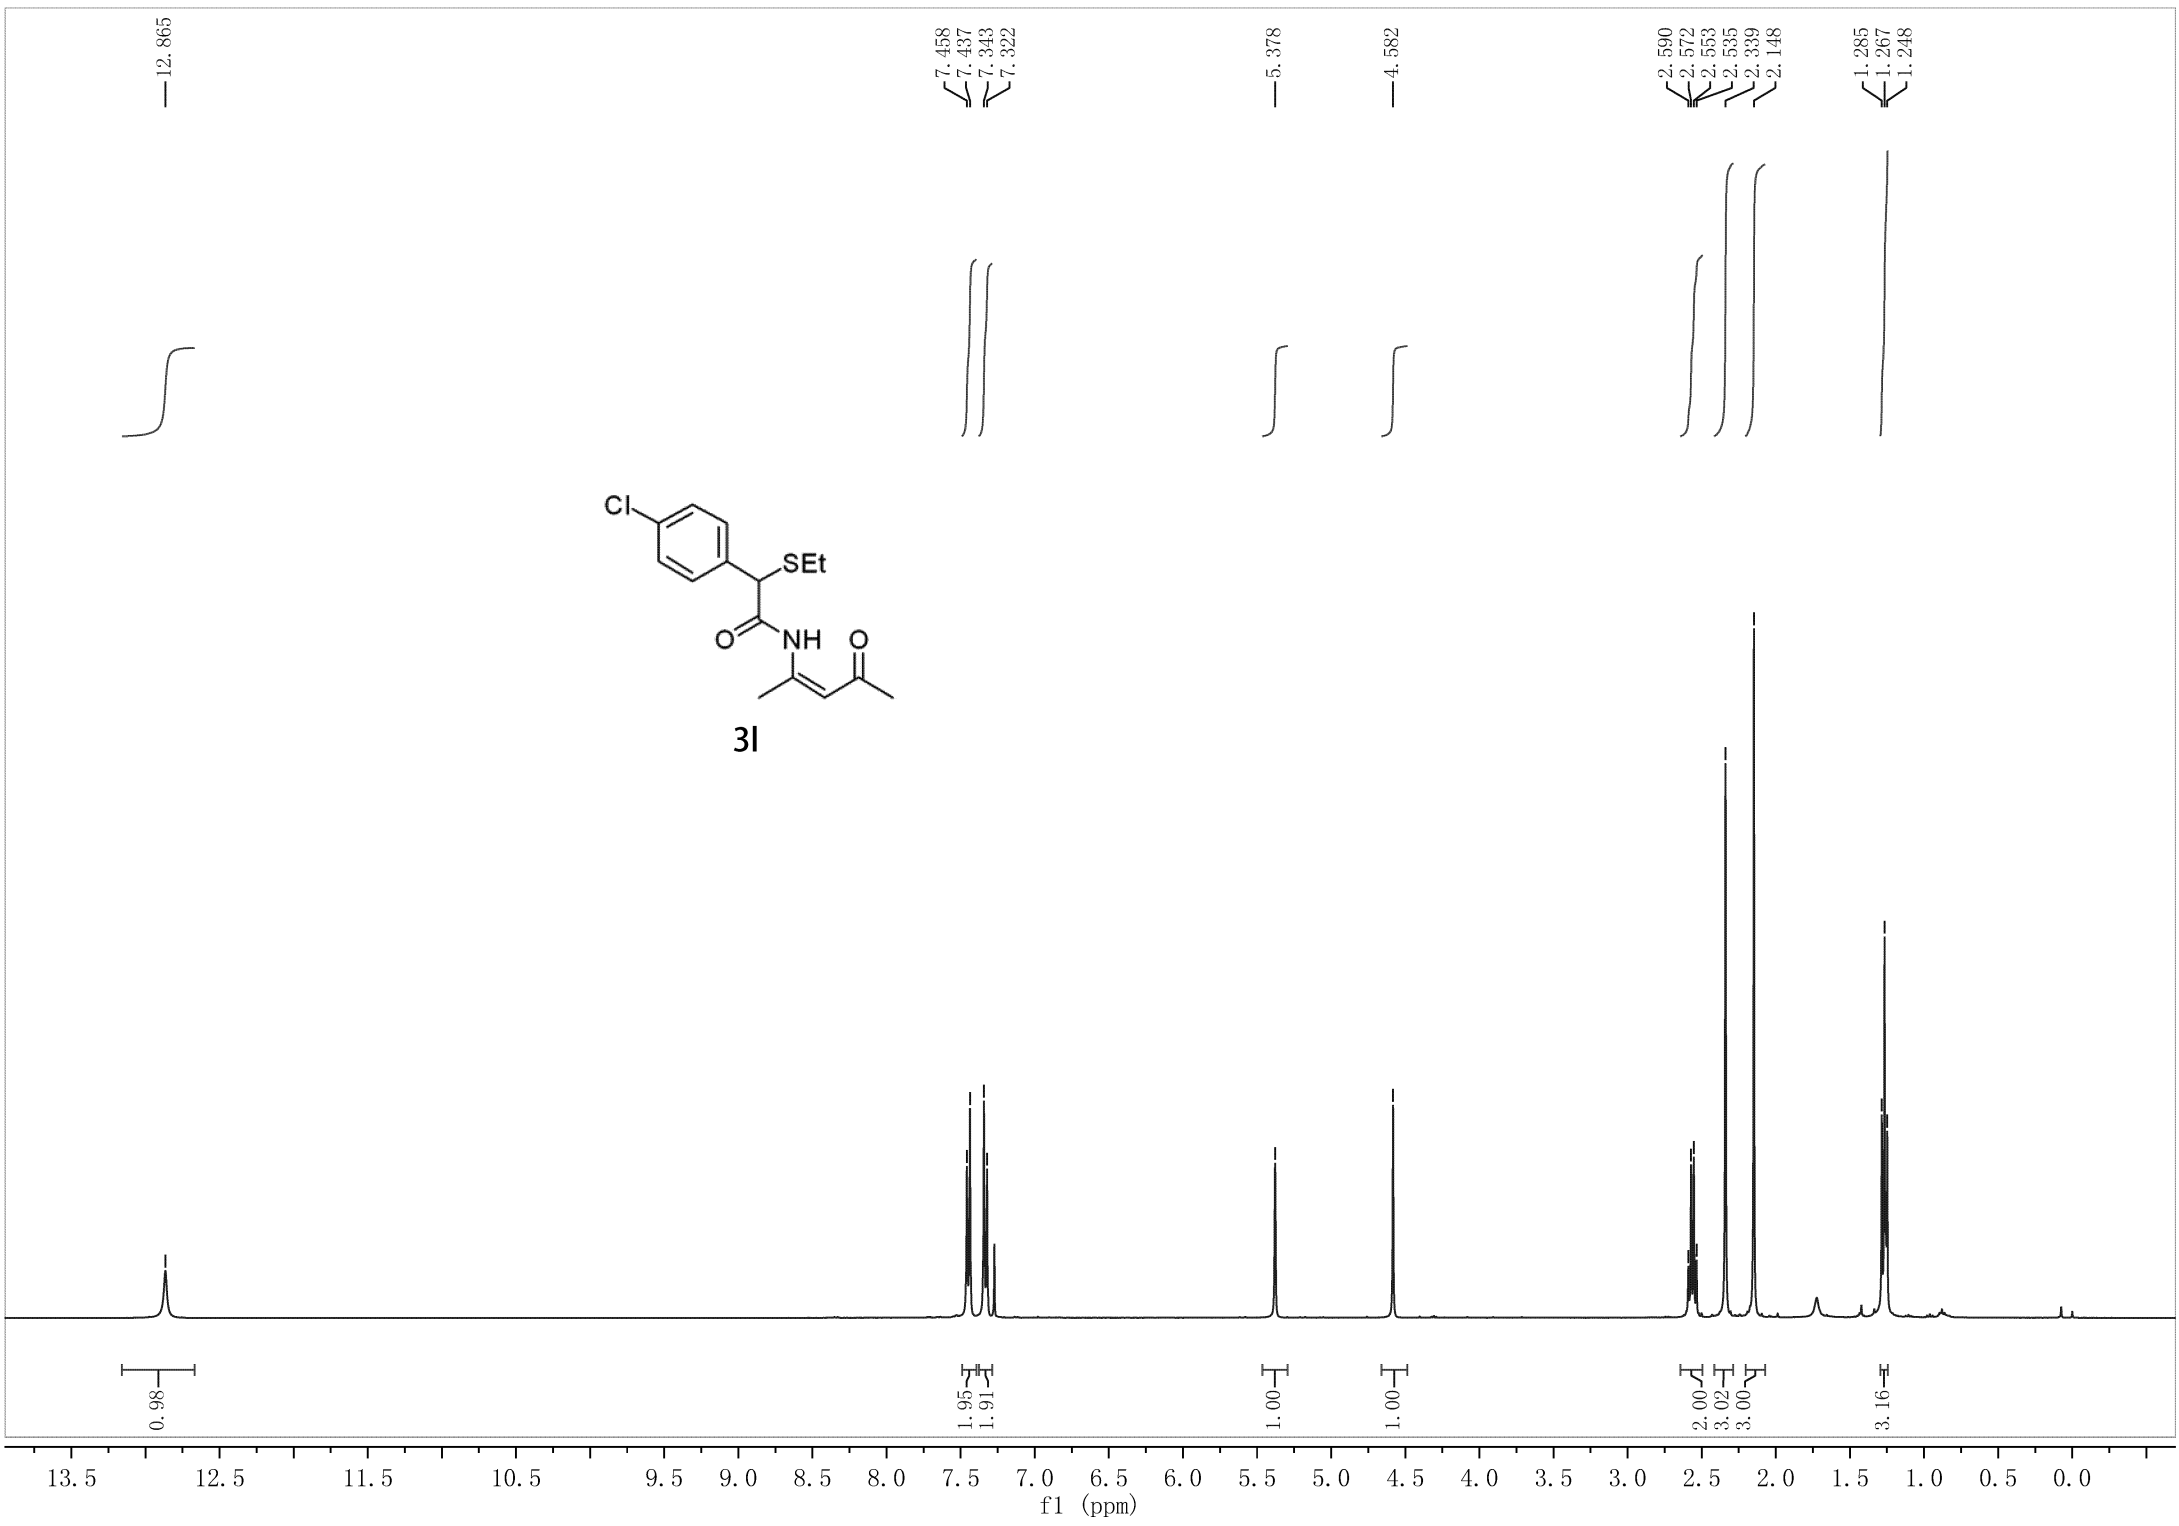

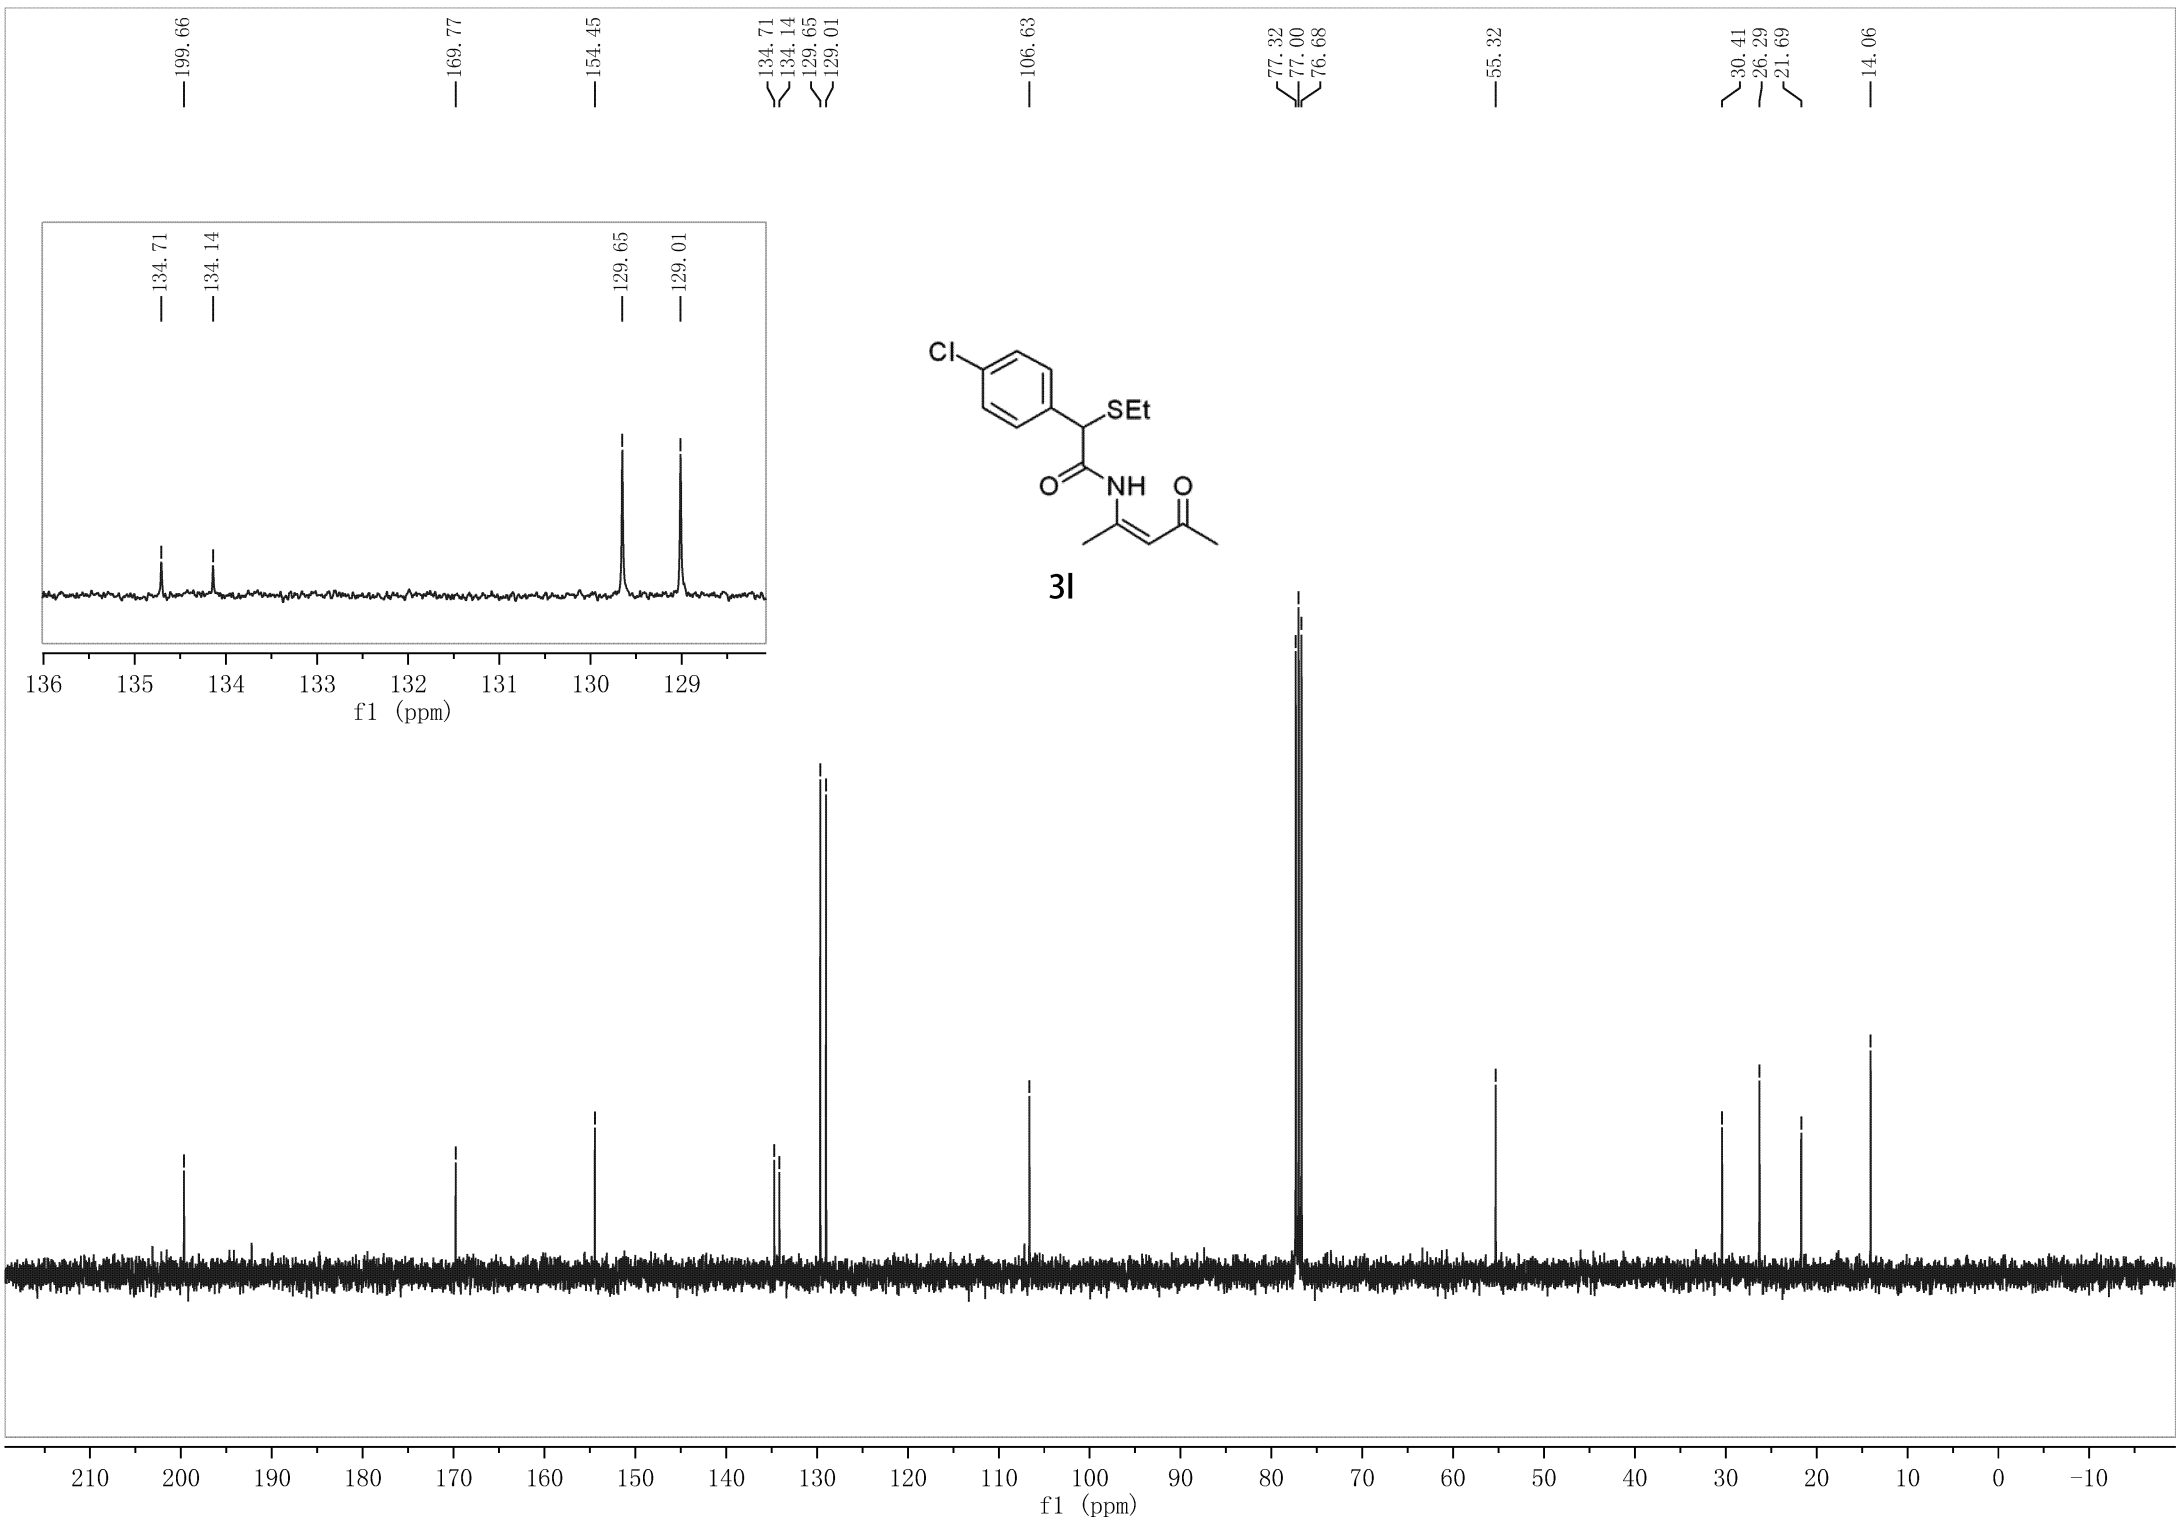

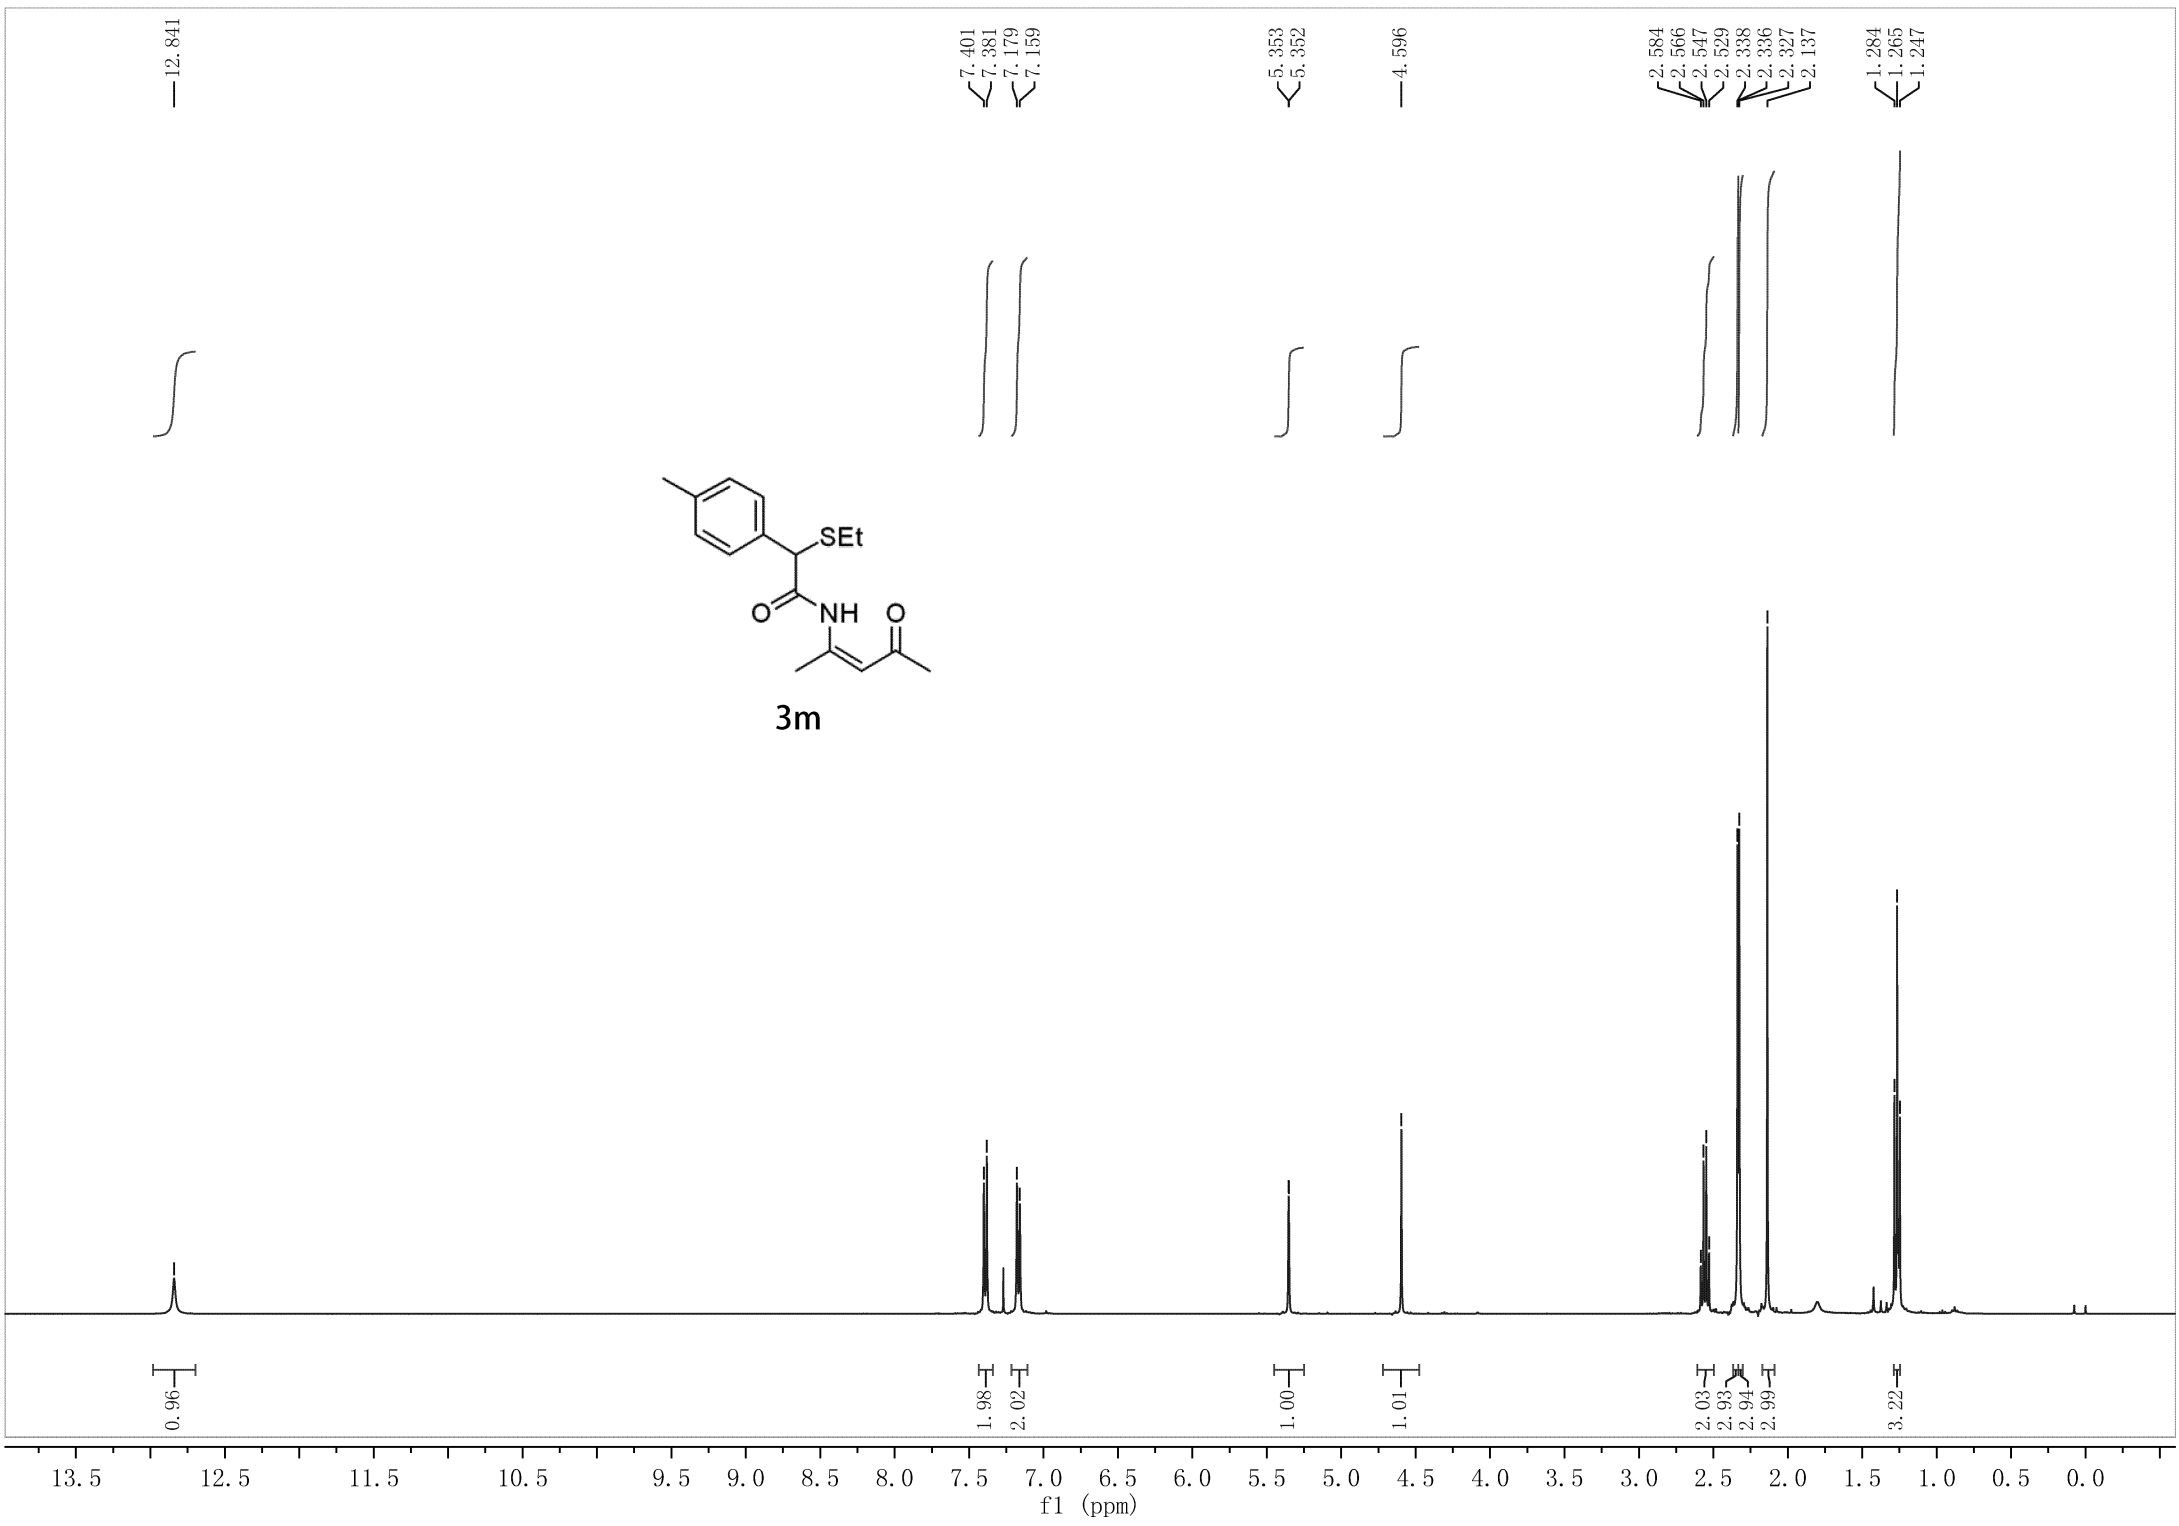

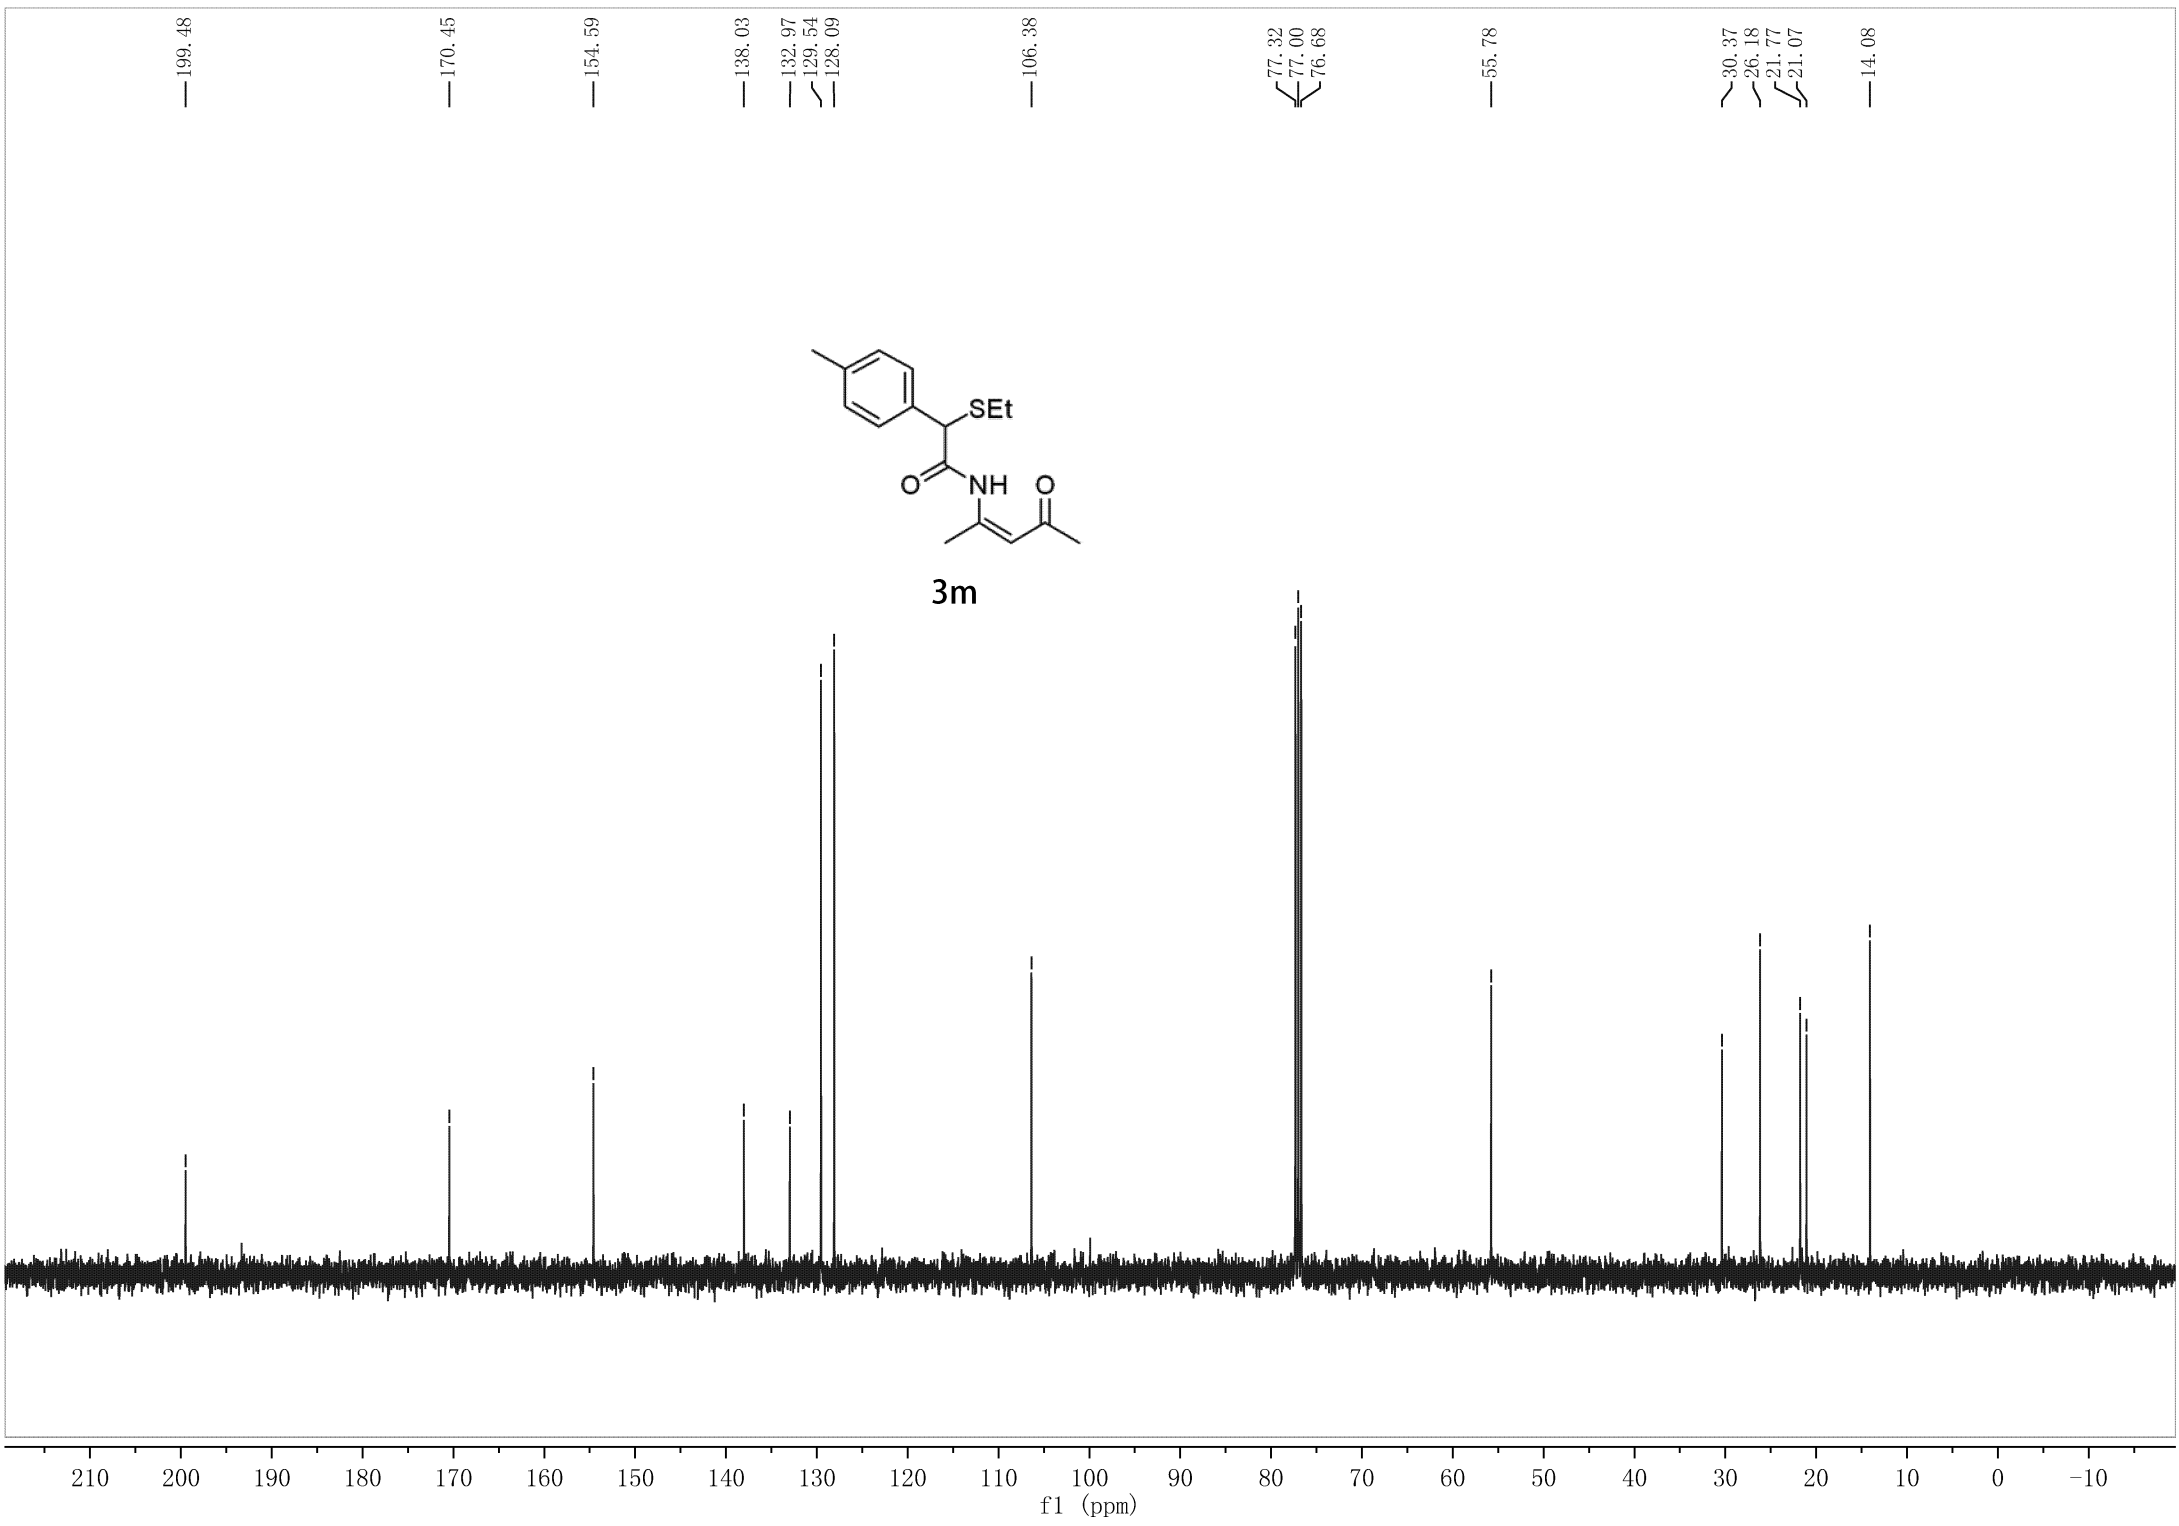



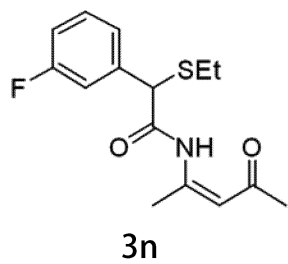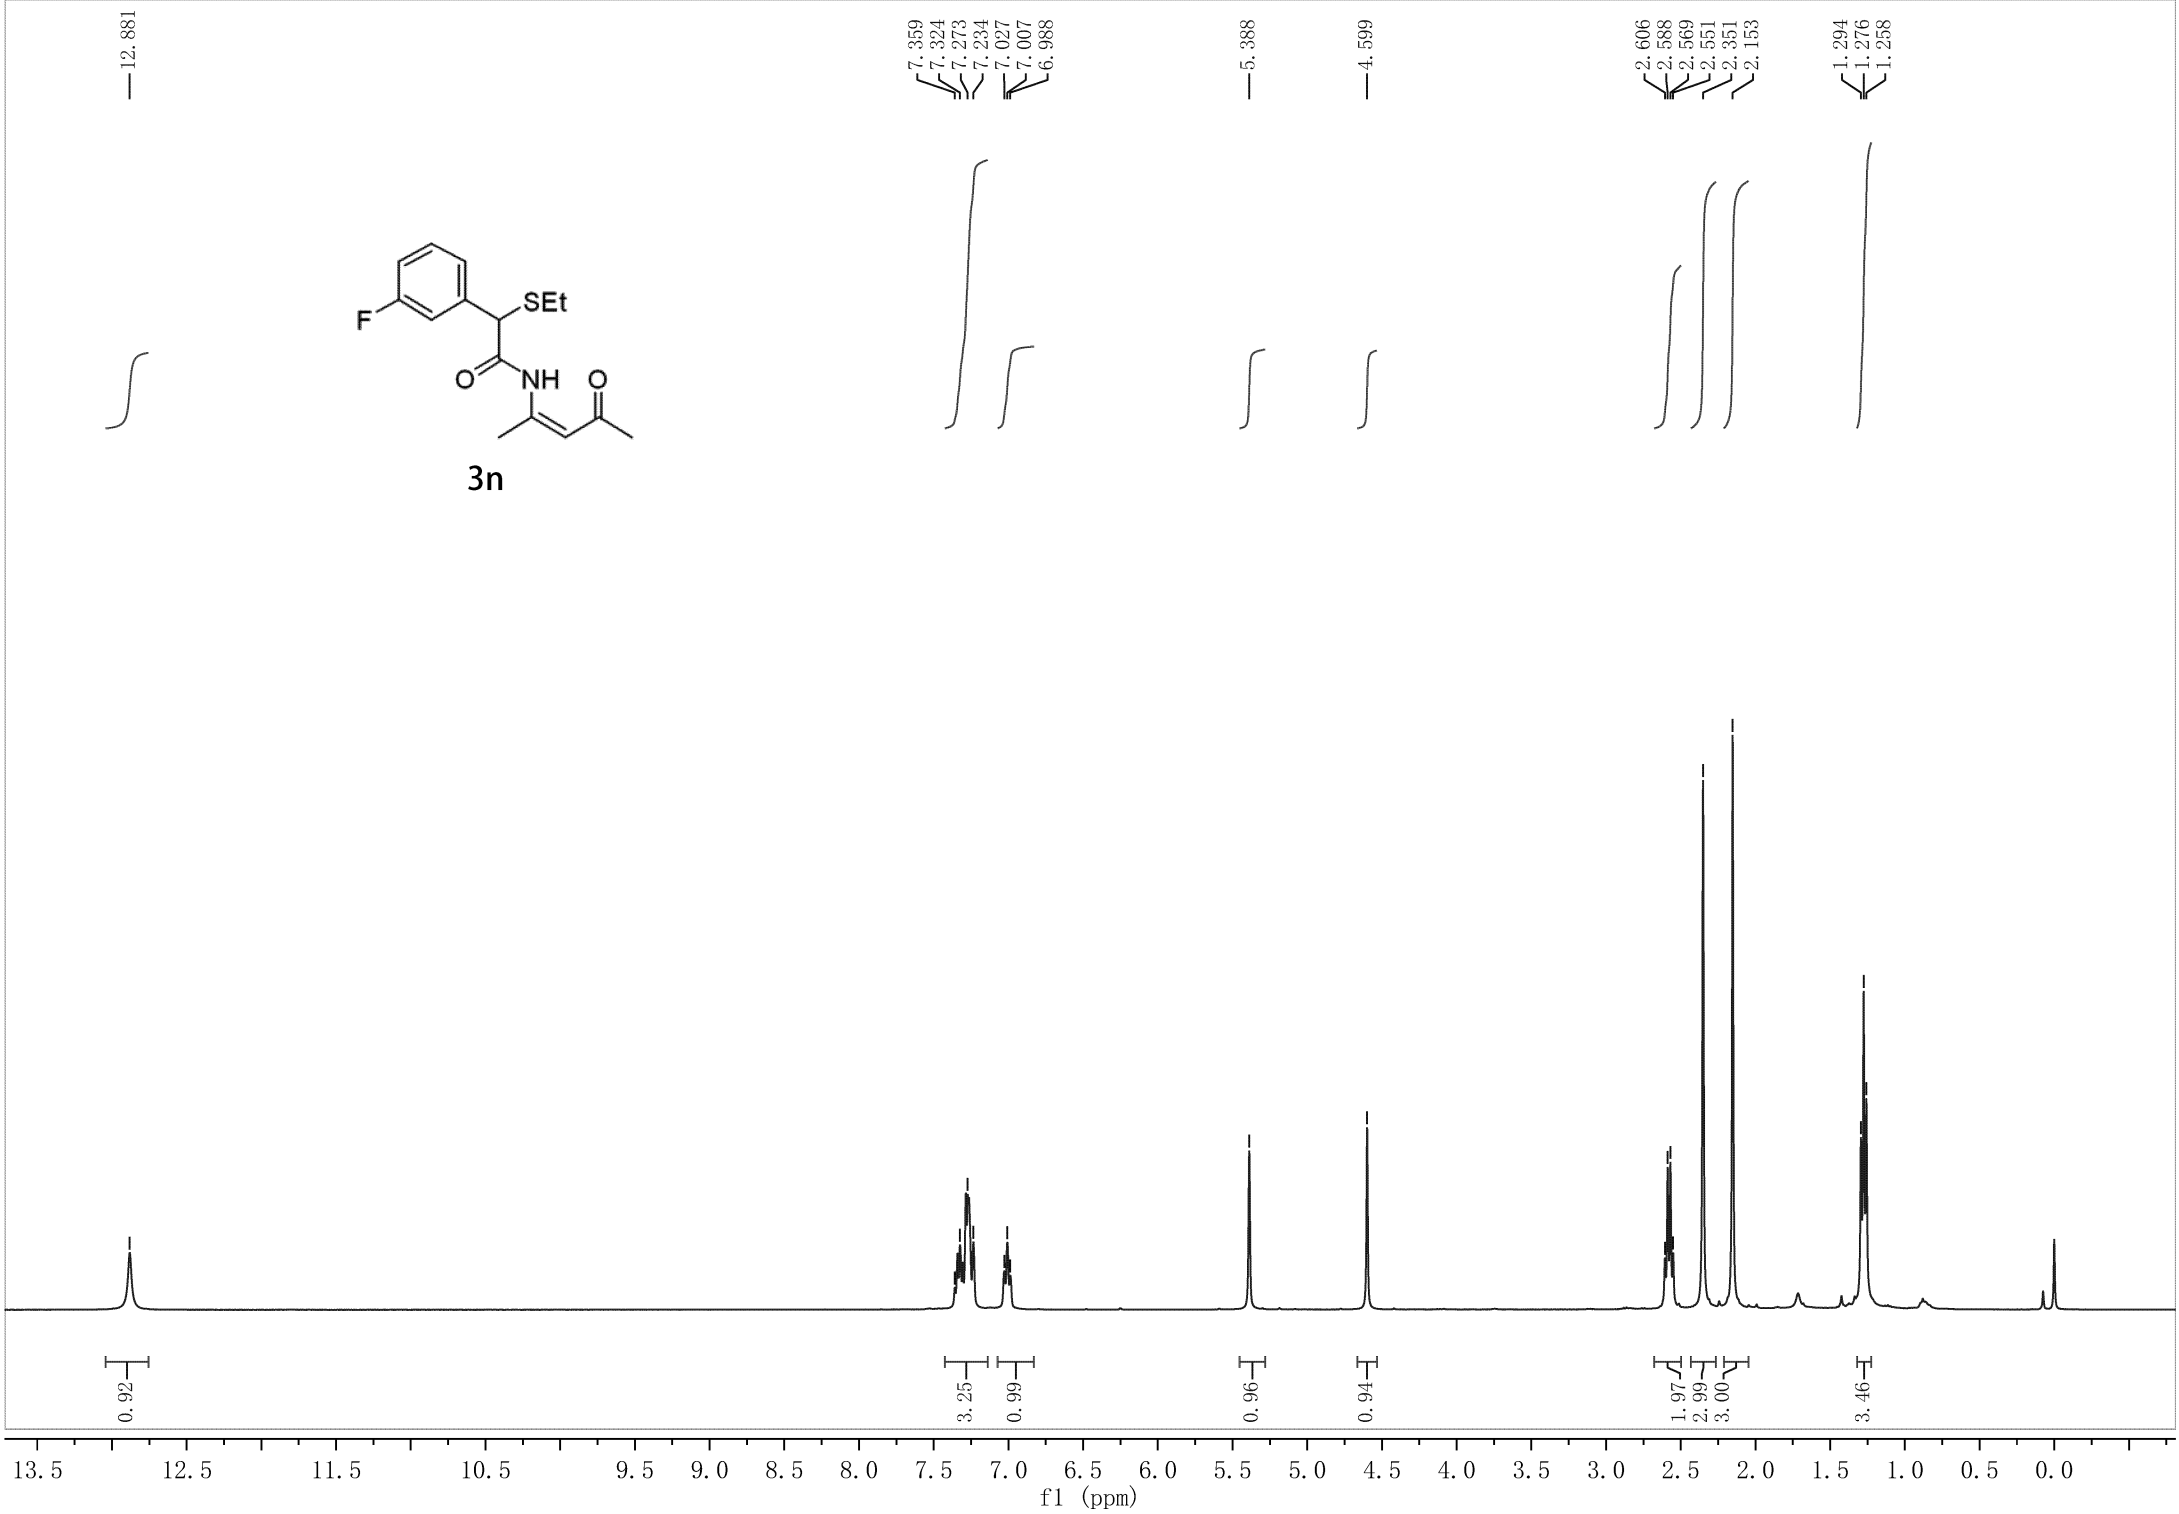

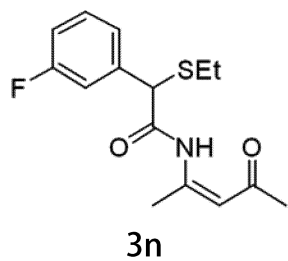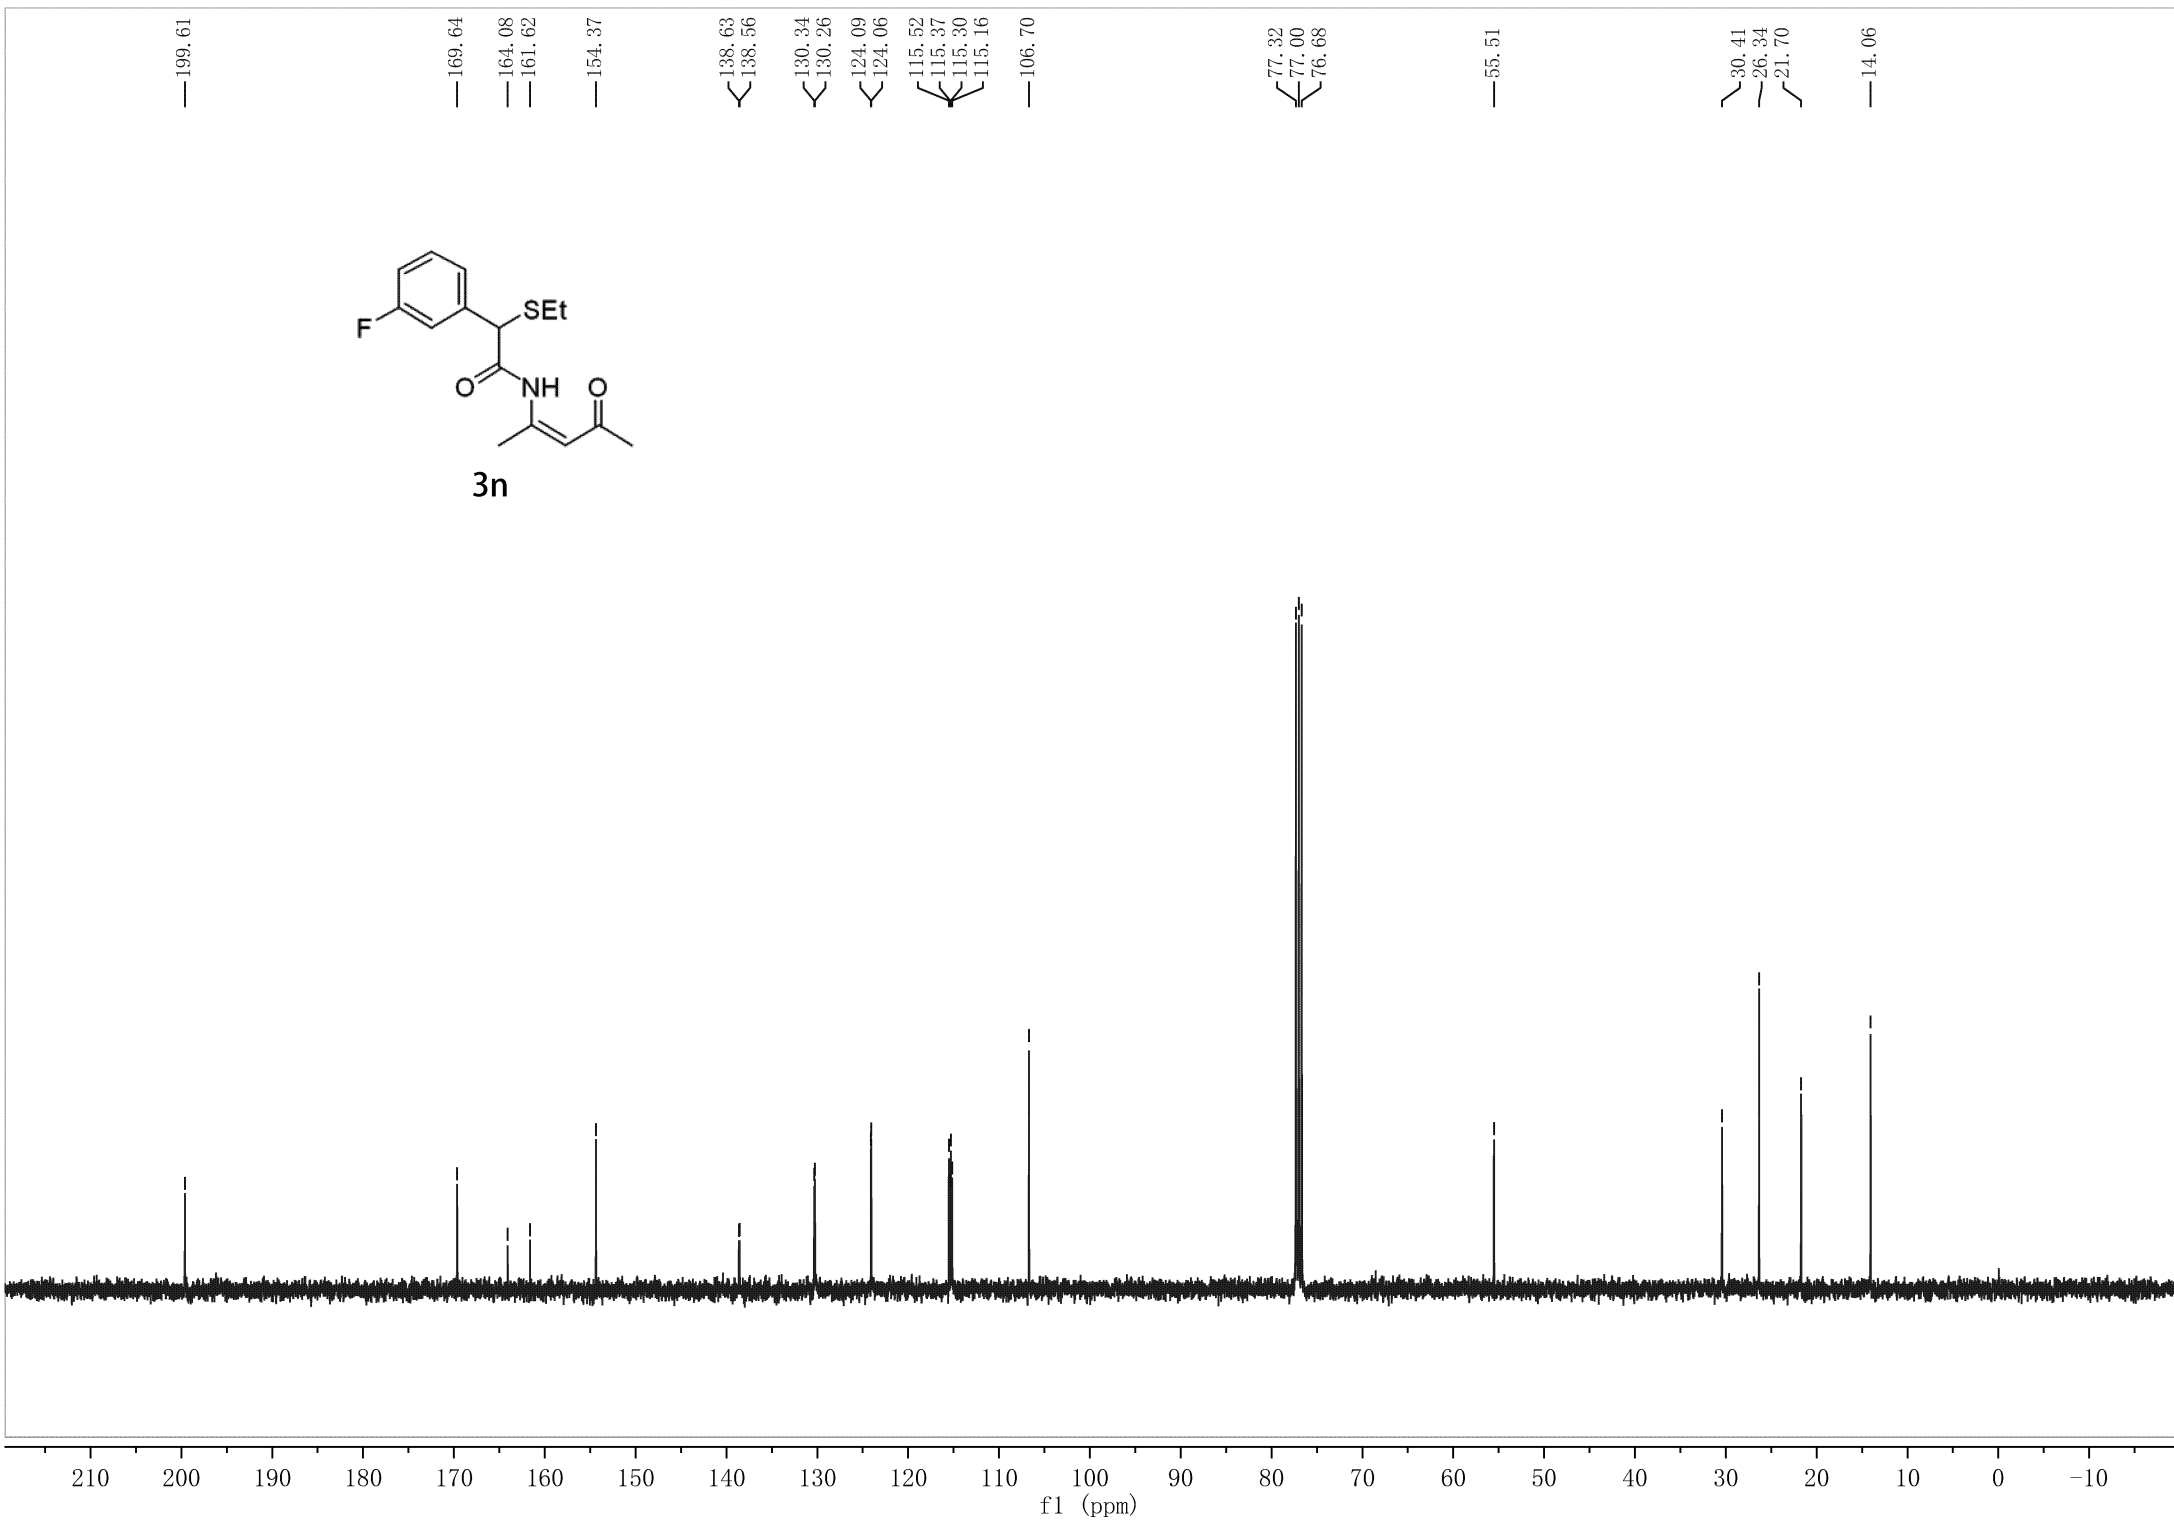

—12.835

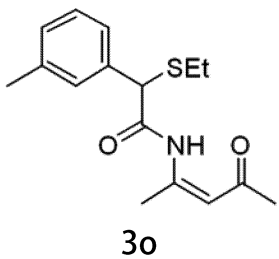

7.346  
7.302  
7.261  
7.246  
7.230  
7.119  
7.104

—5.356

—4.575

2.593  
2.578  
2.563  
2.549  
2.348  
2.138

1.287  
1.272  
1.258

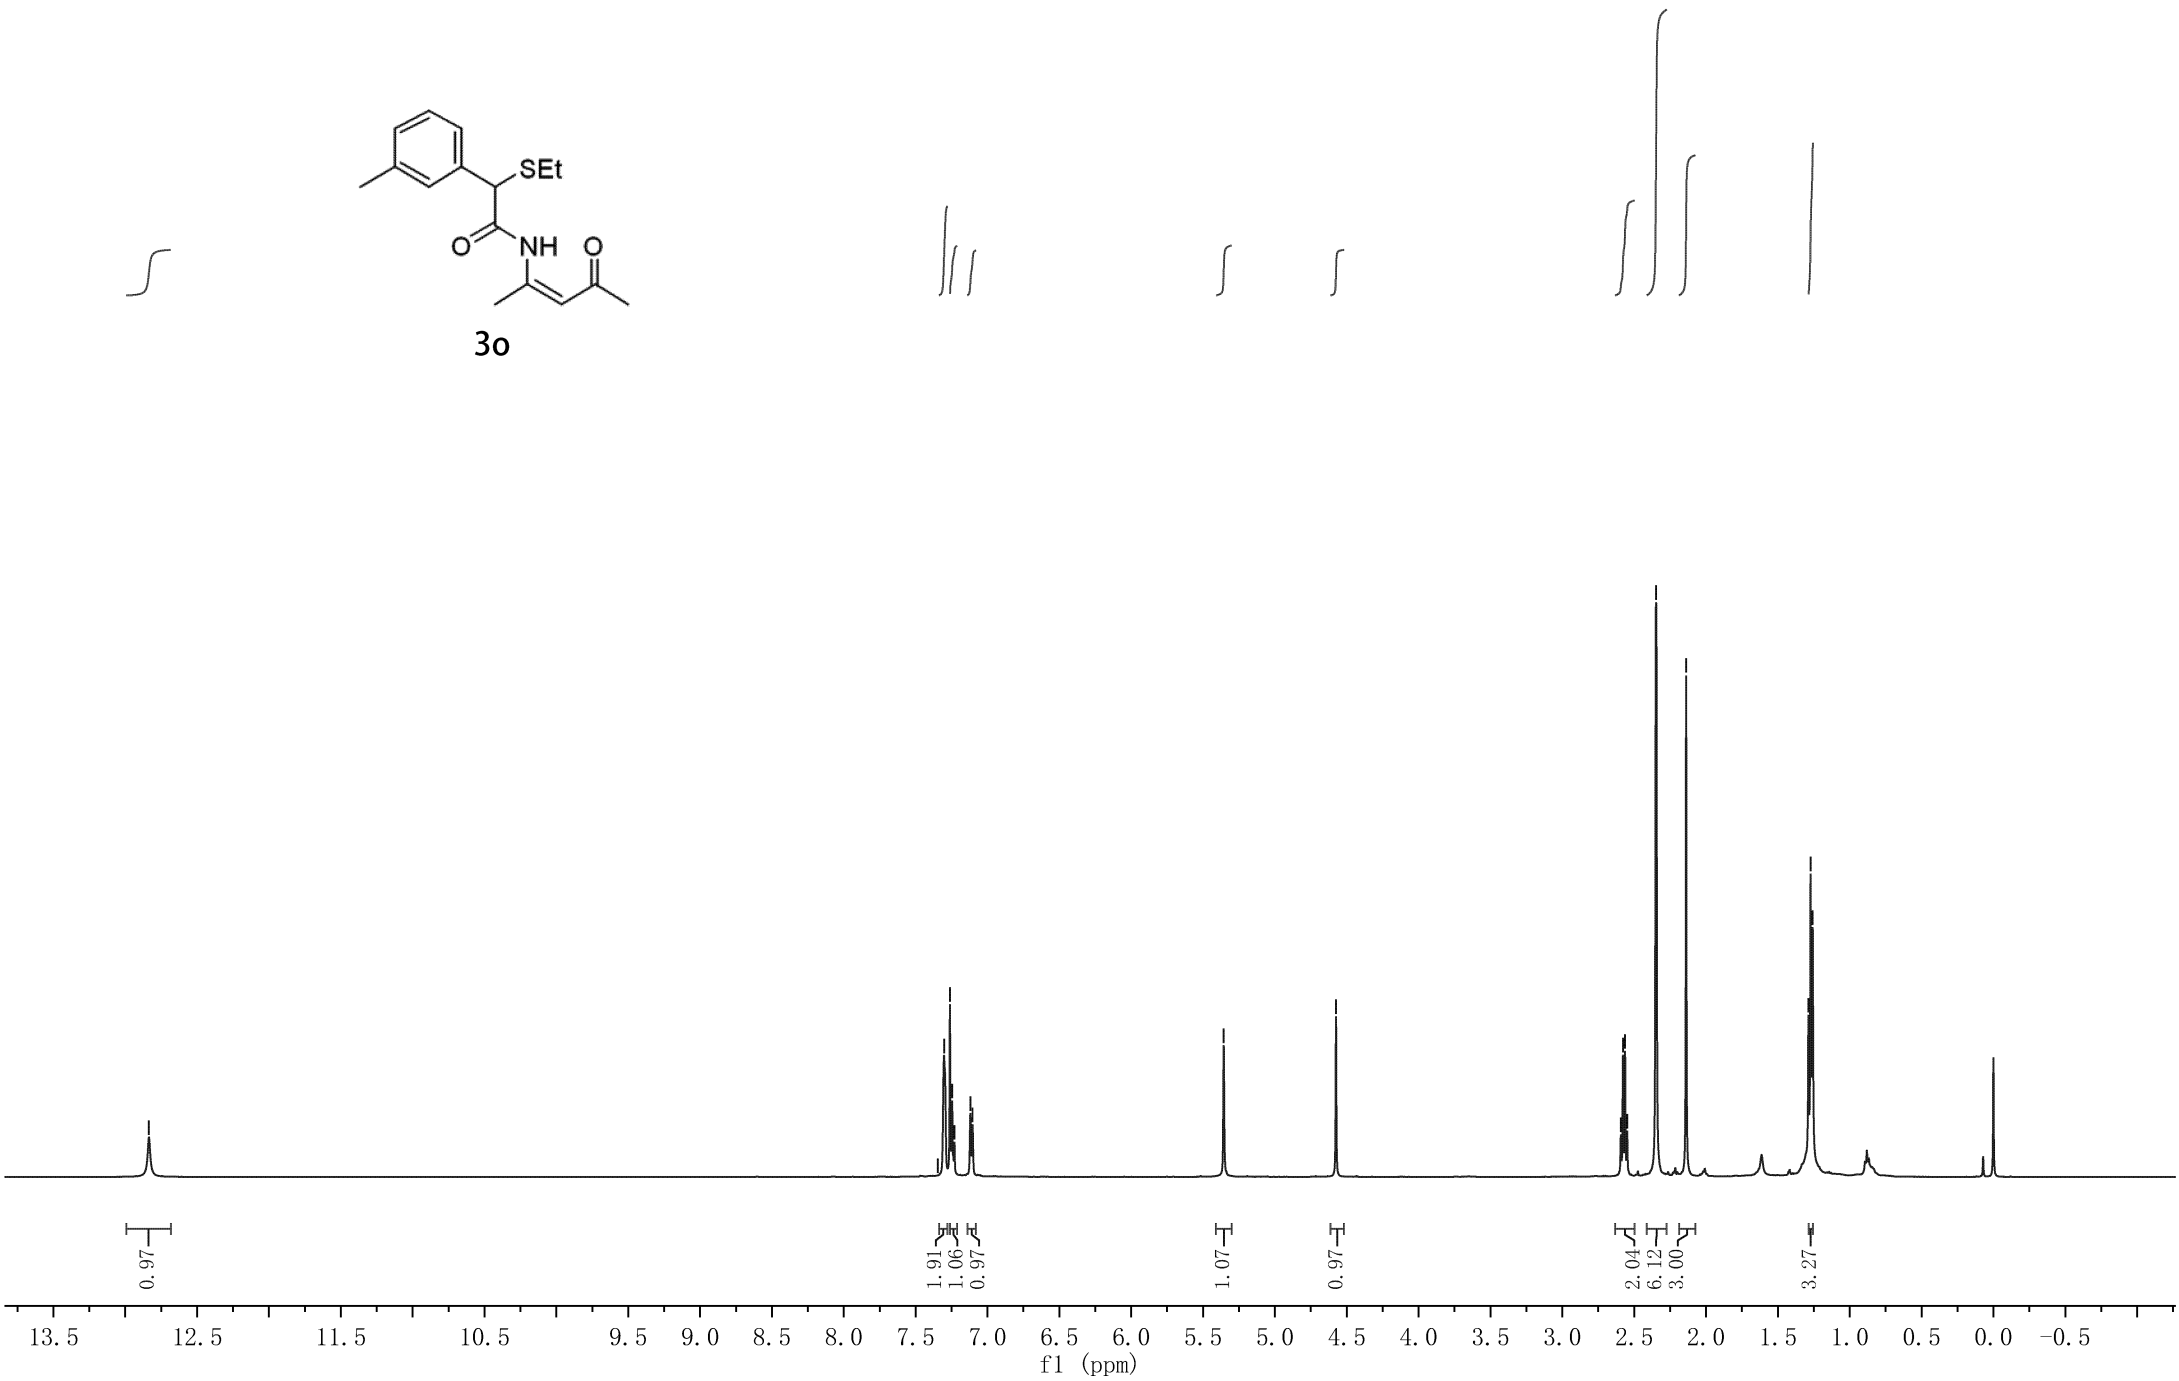

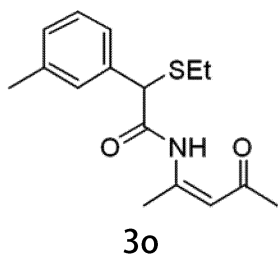

—199.44

—170.43

—154.55

—138.63

—135.98

129.05

128.96

128.75

125.31

—106.49

77.25

77.00

76.75

—56.13

30.42

26.34

21.80

21.38

—14.13

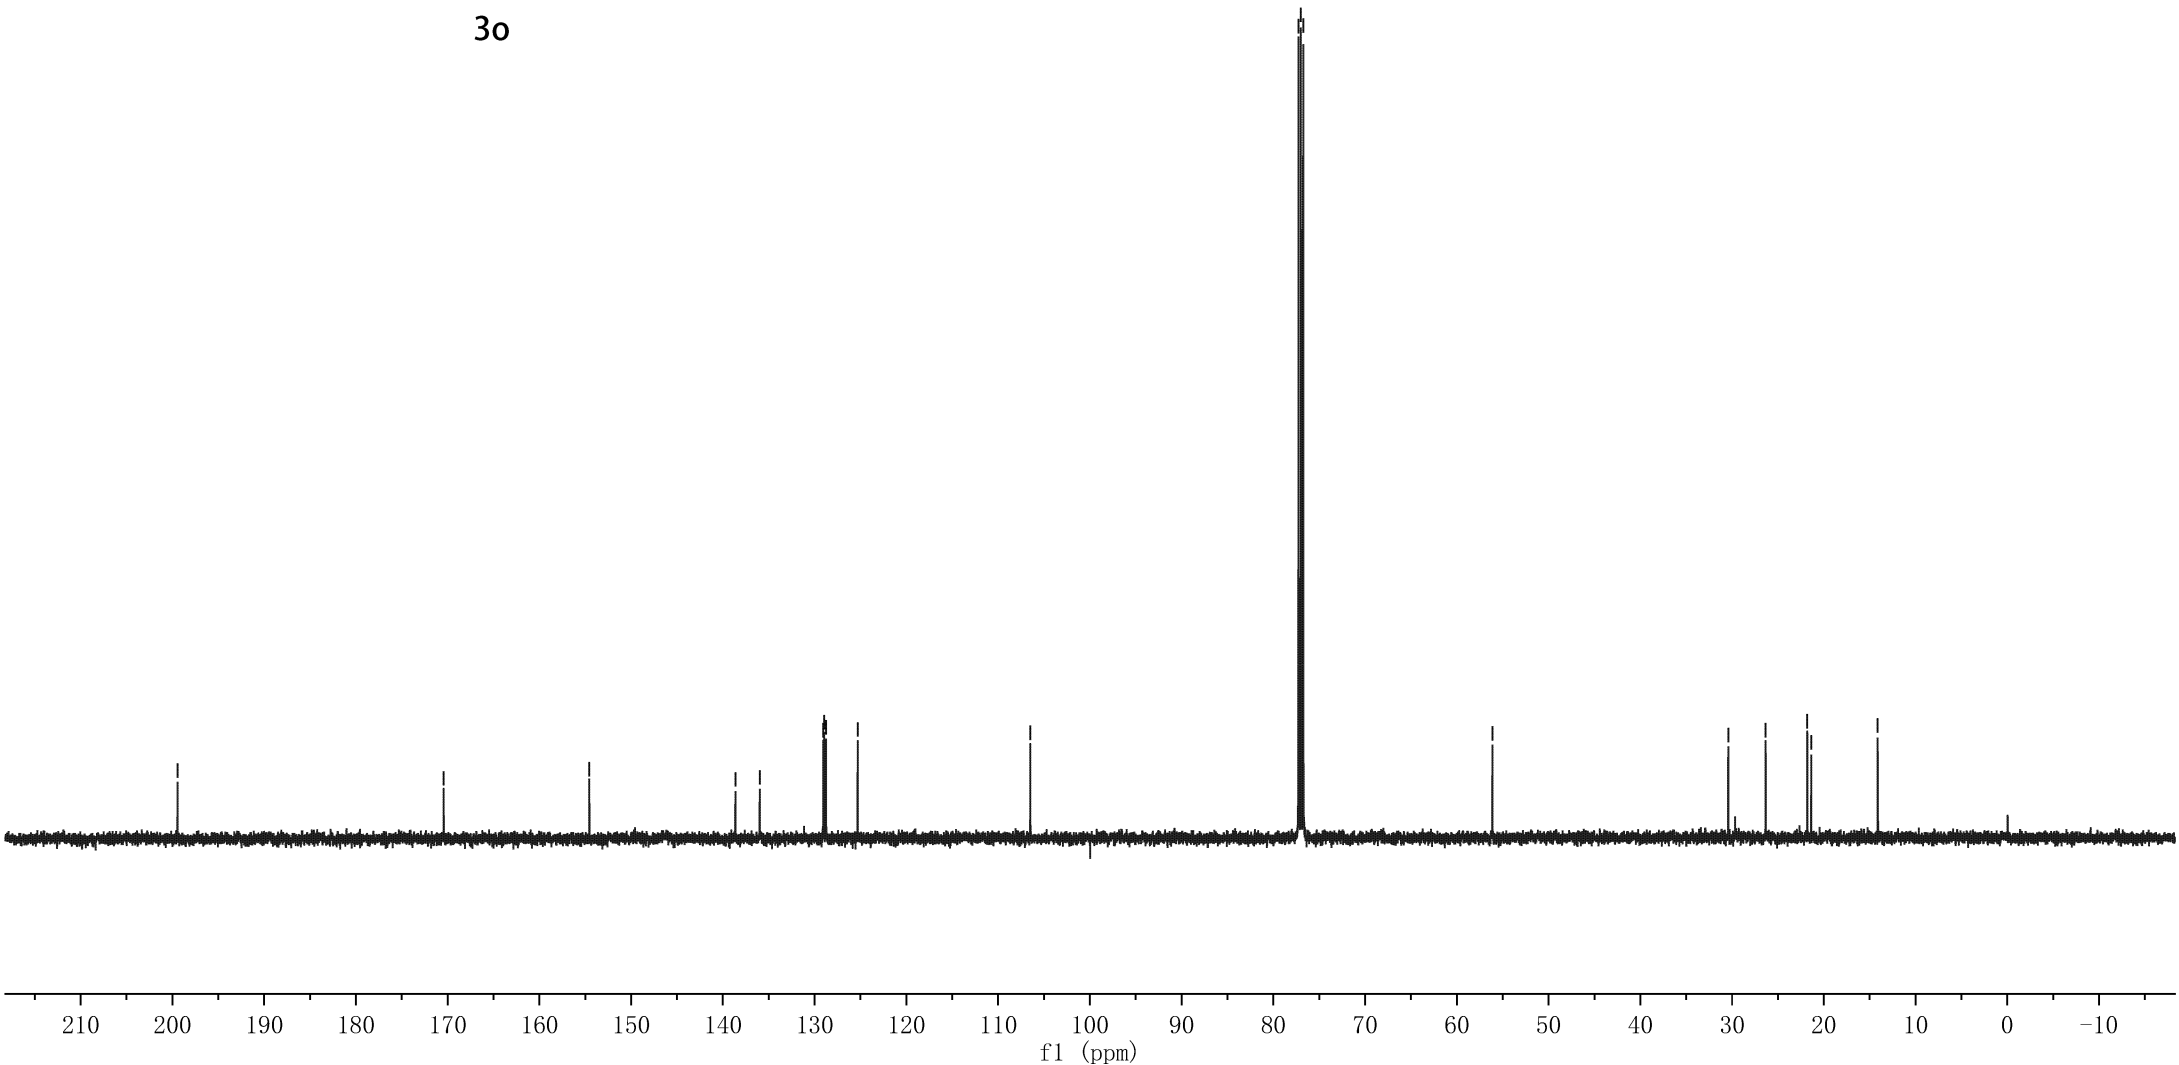

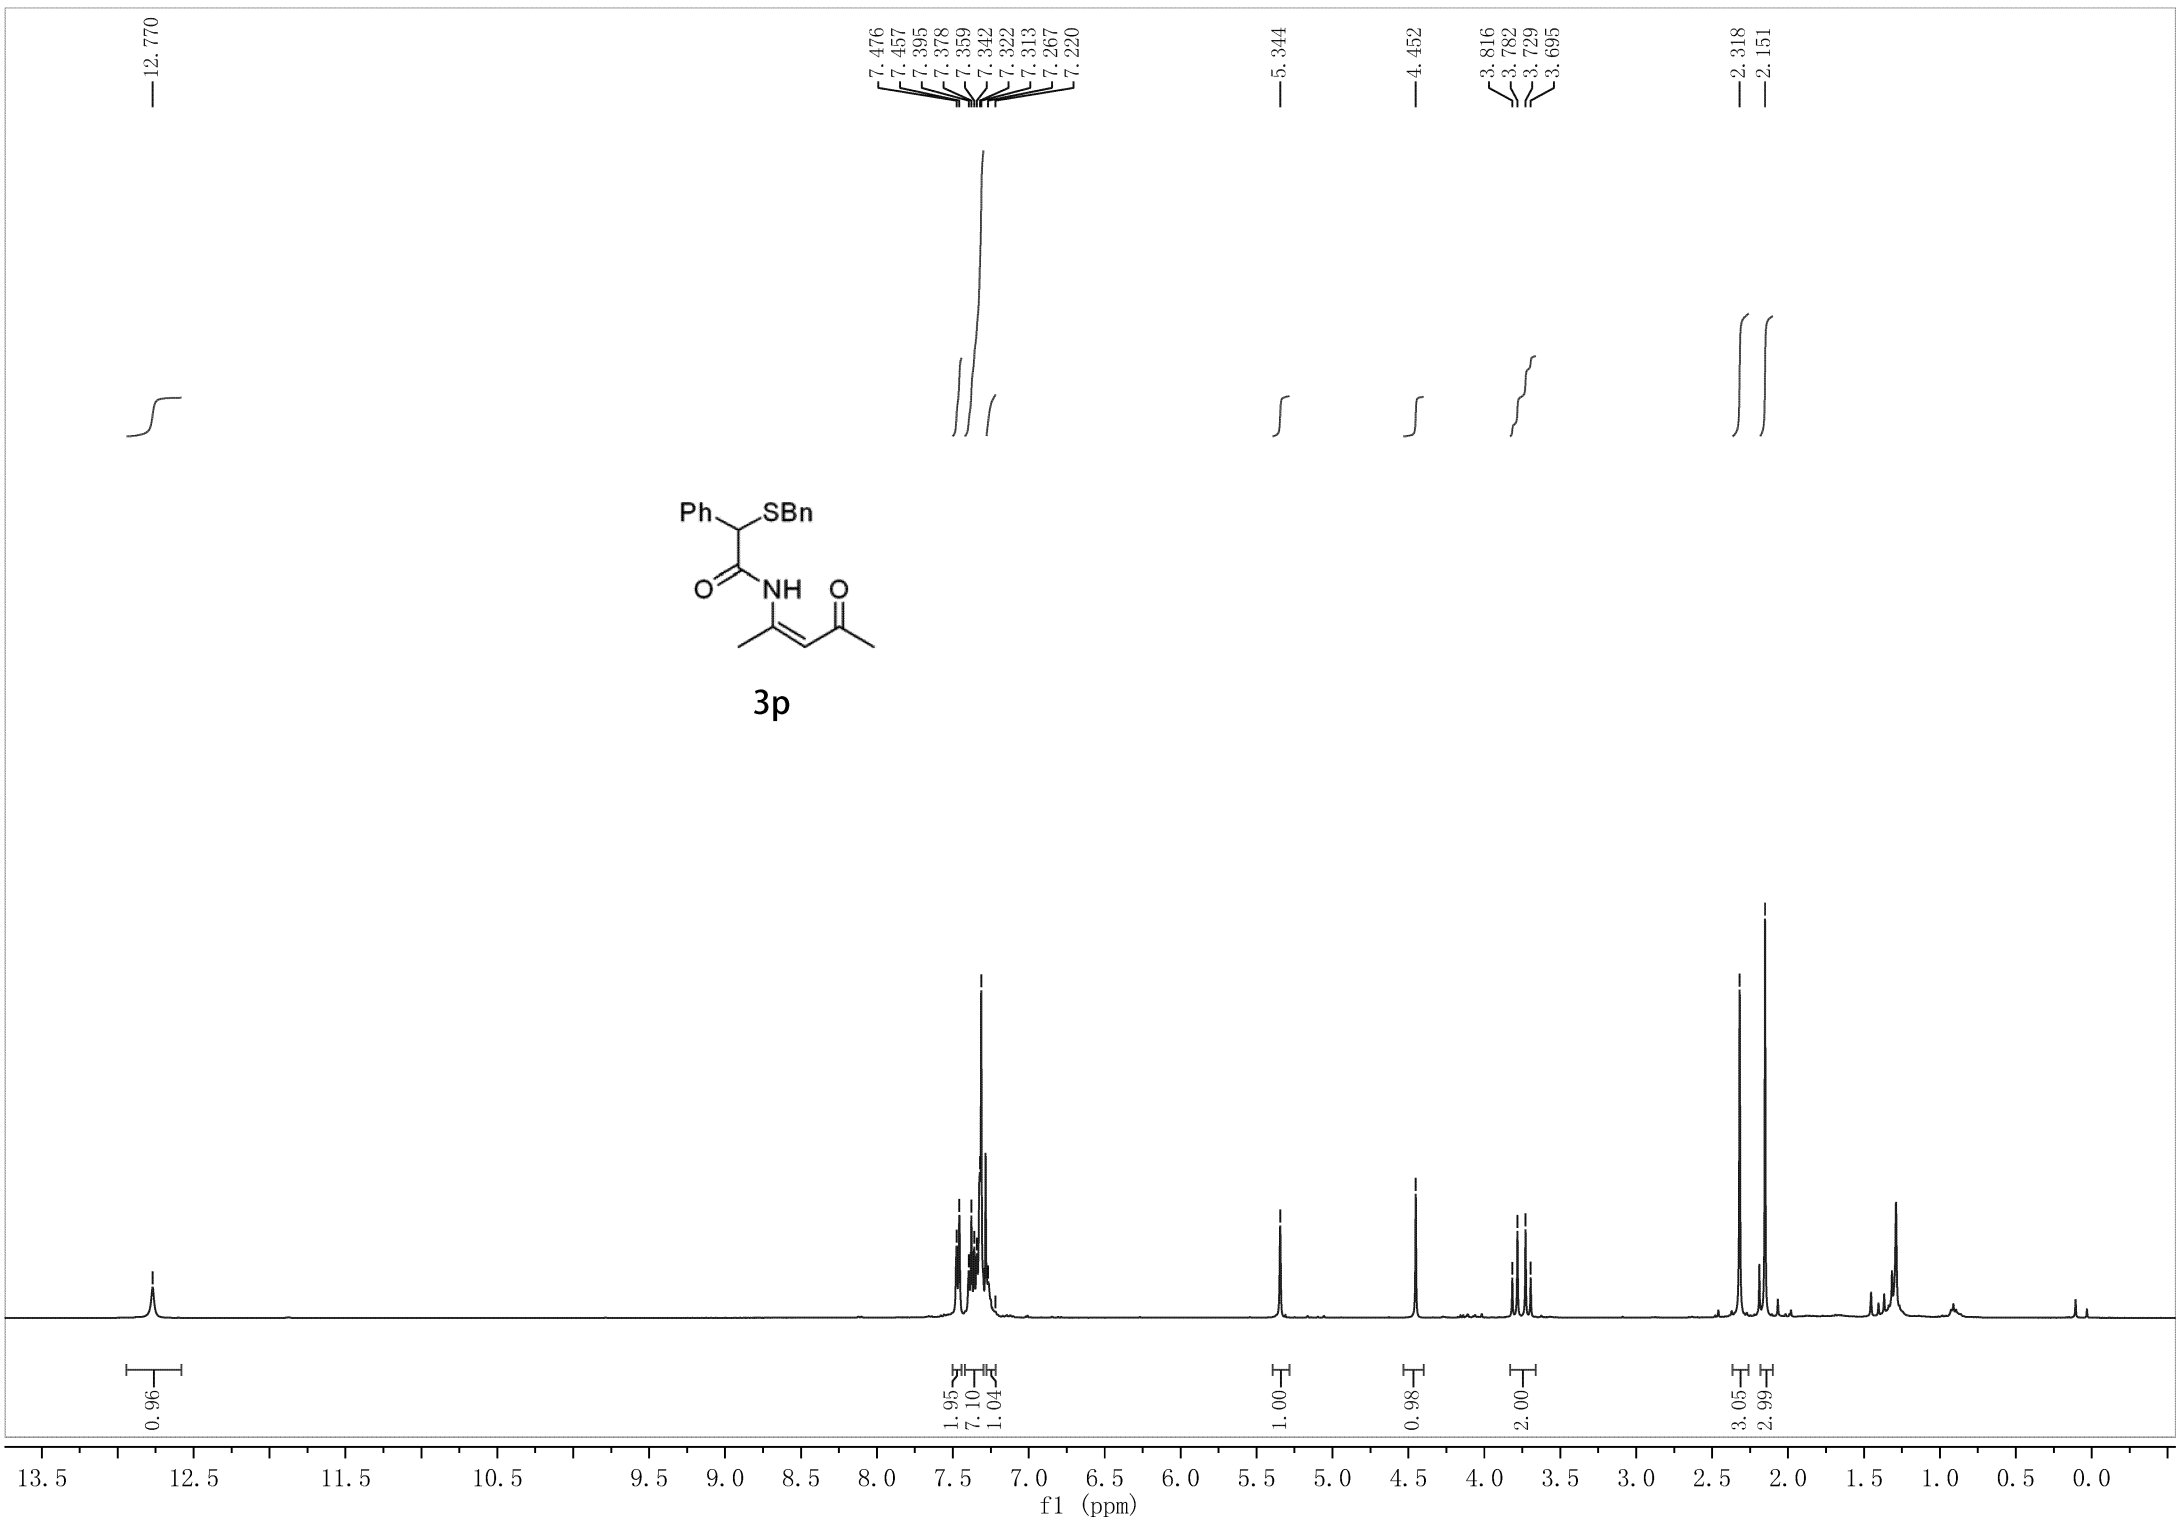

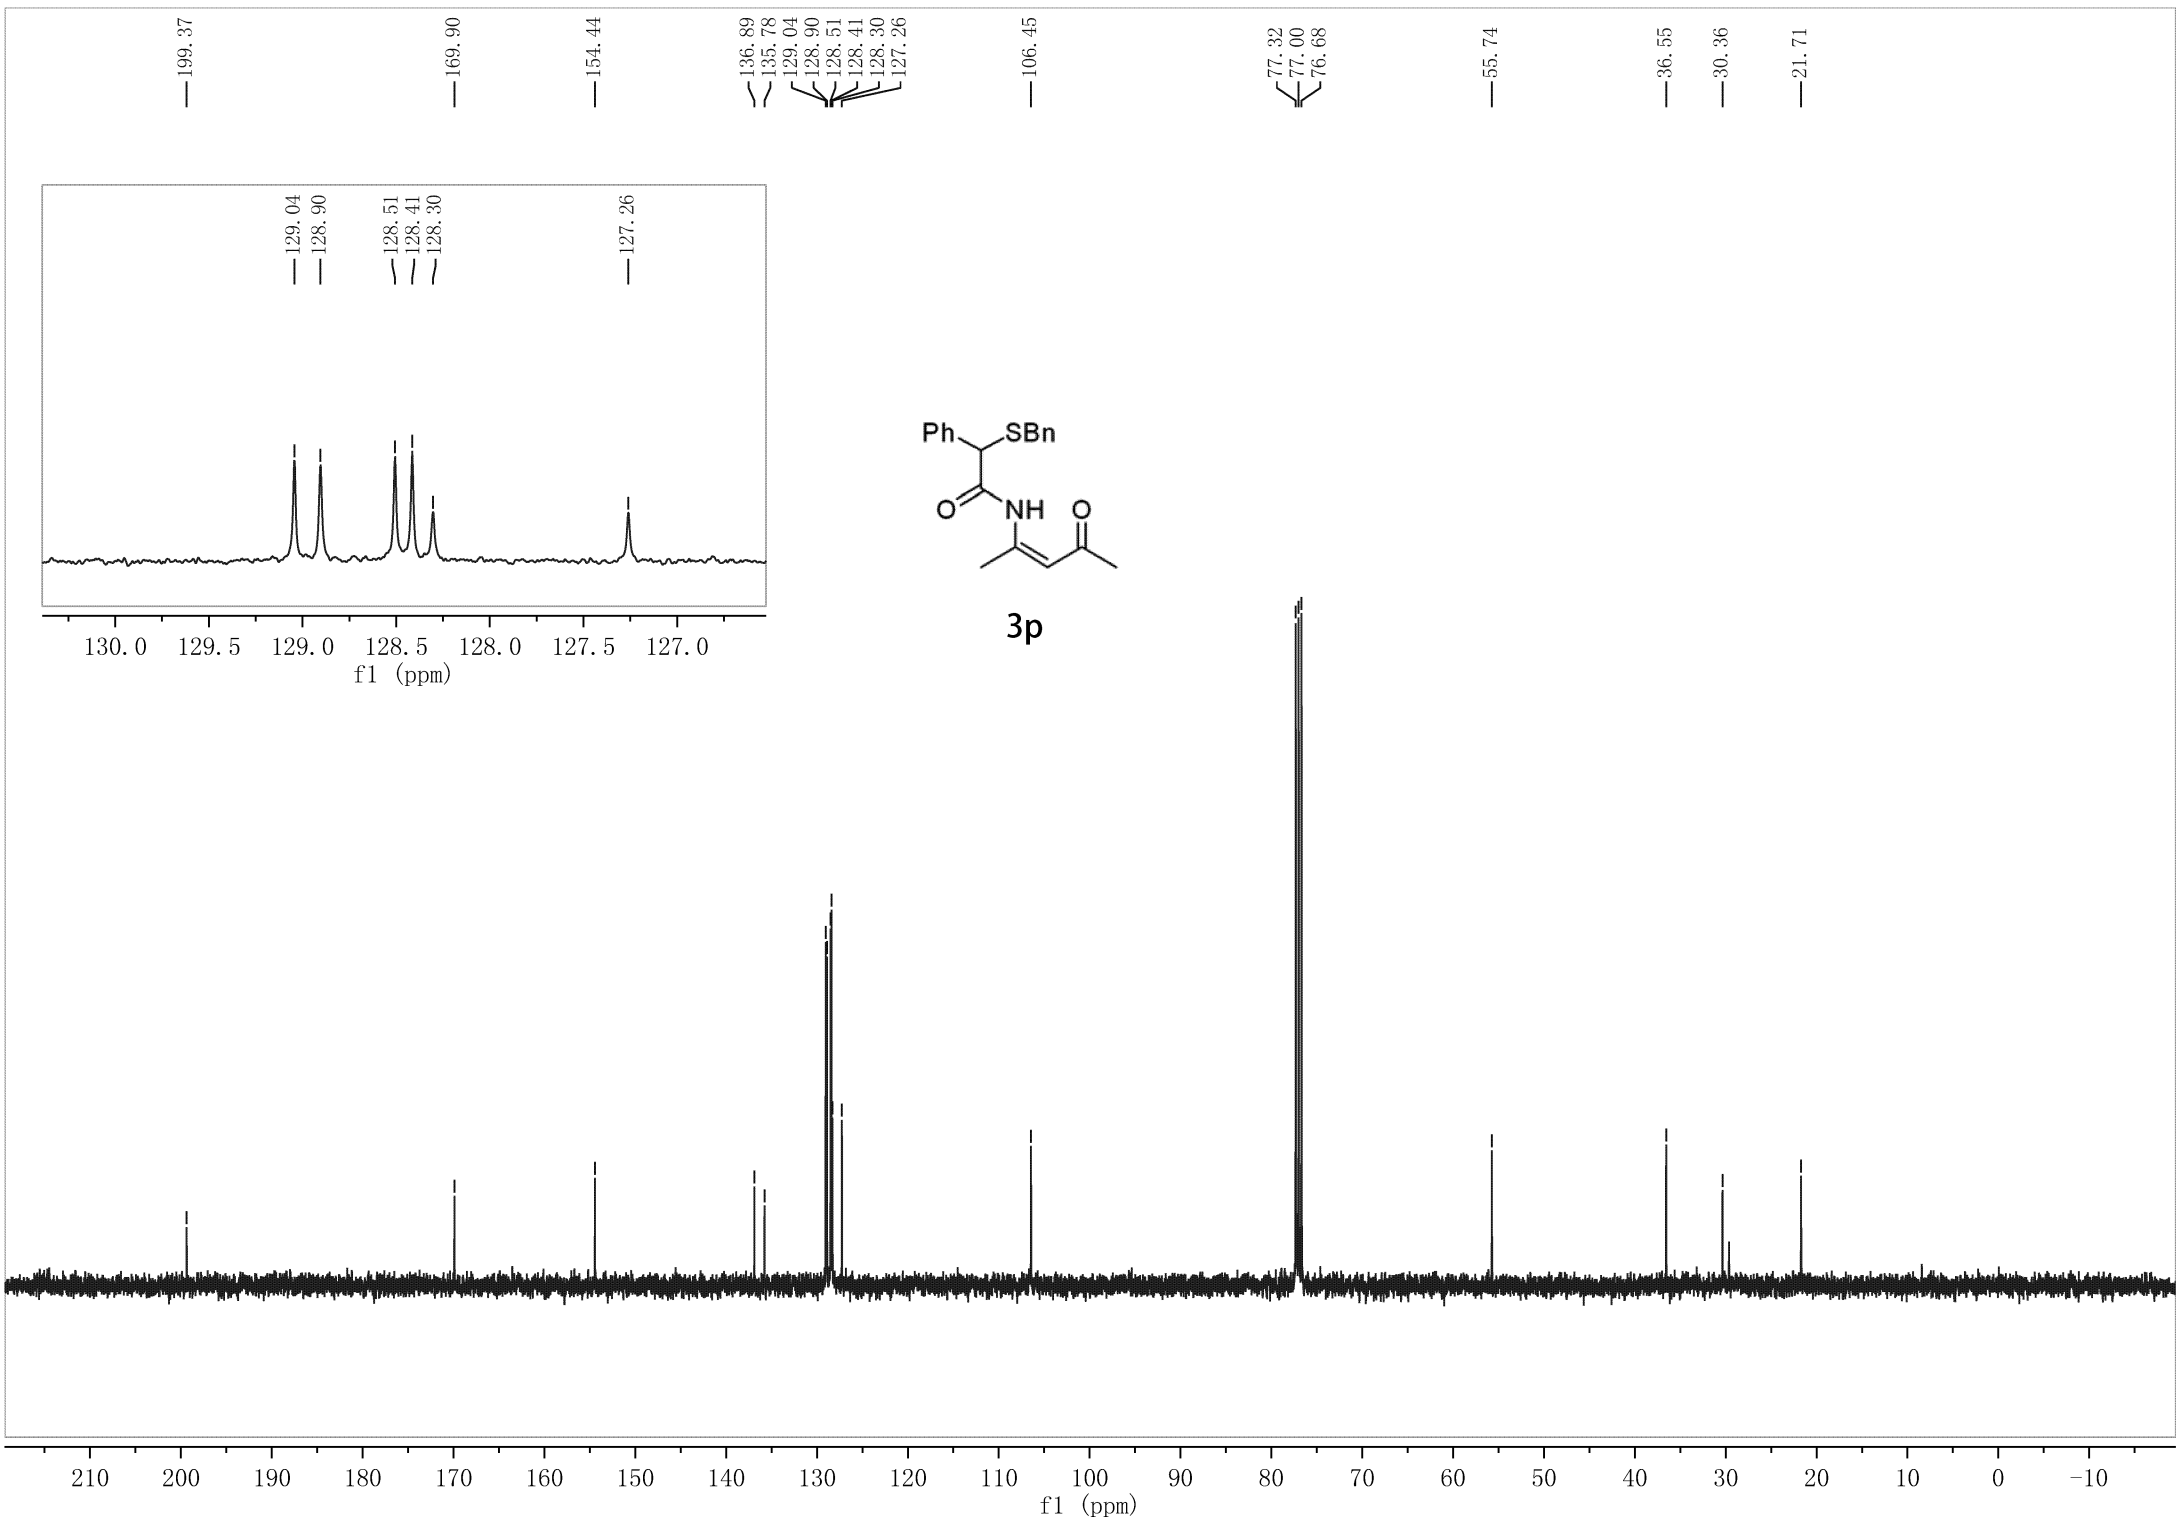

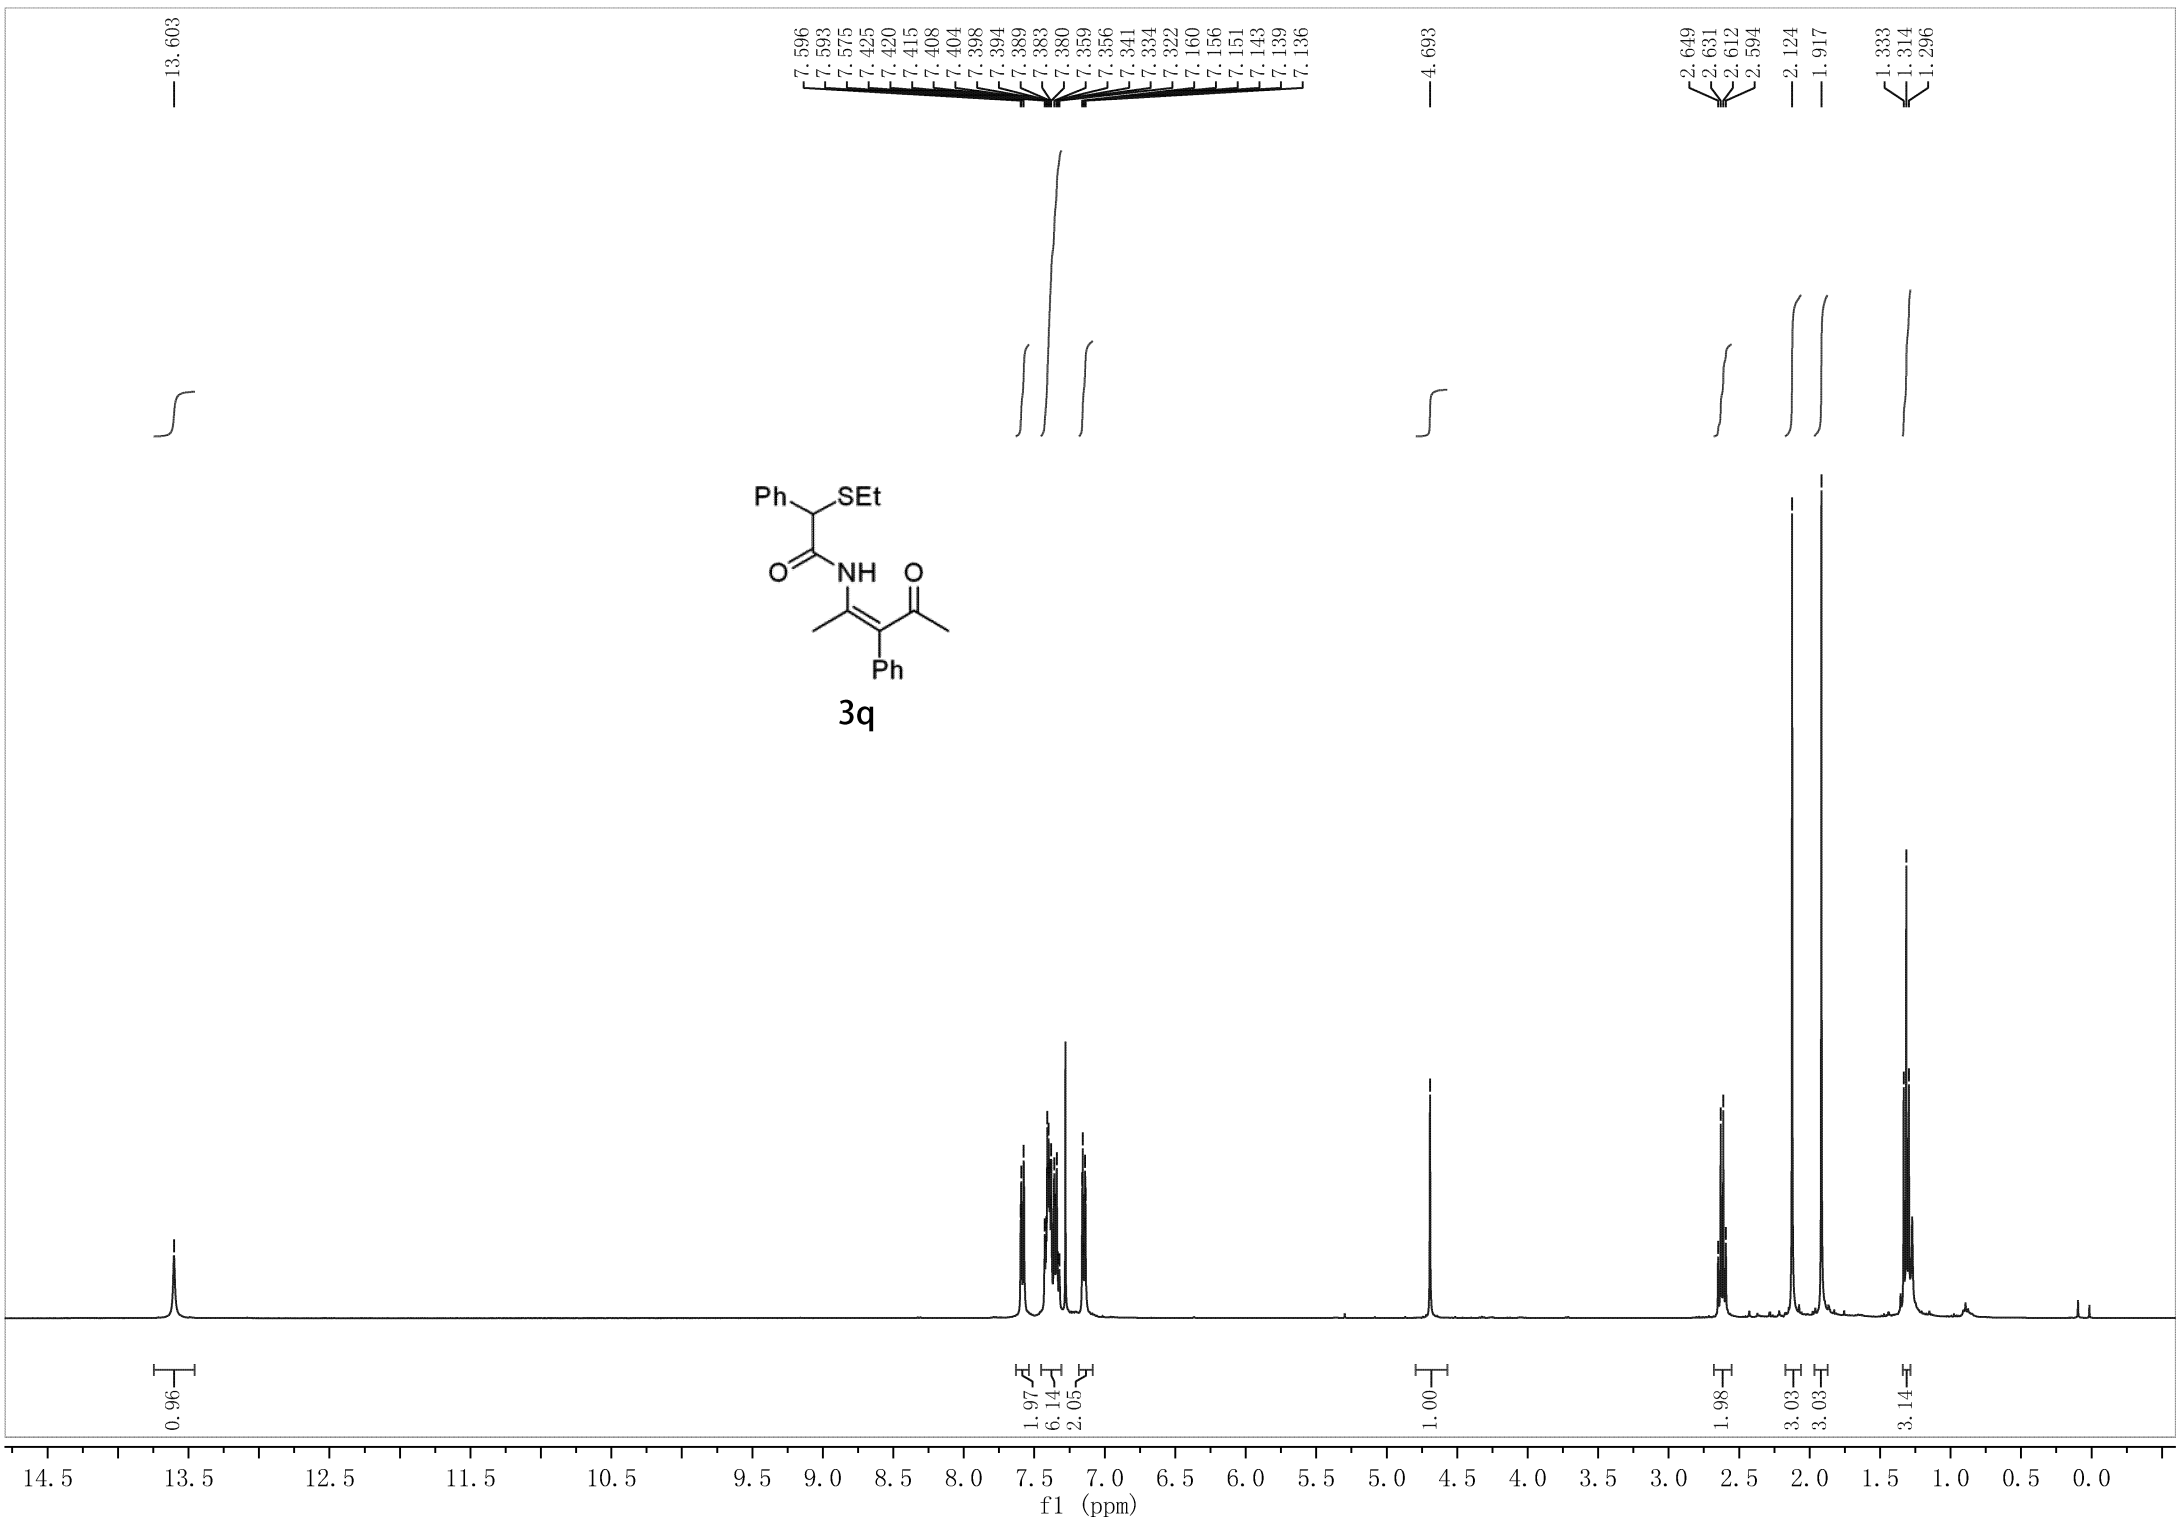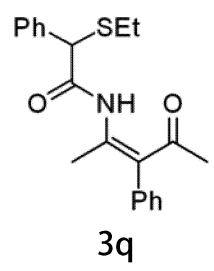

13.603

7.596  
7.593  
7.575  
7.425  
7.420  
7.415  
7.408  
7.404  
7.398  
7.394  
7.389  
7.383  
7.380  
7.359  
7.356  
7.341  
7.334  
7.322  
7.160  
7.156  
7.151  
7.143  
7.139  
7.136

4.693

2.649  
2.631  
2.612  
2.594

2.124  
1.917

1.333  
1.314  
1.296

0.96

1.97  
6.14  
2.05

1.00

1.98

3.03  
3.03

3.14

14.5 13.5 12.5 11.5 10.5 9.5 9.0 8.5 8.0 7.5 7.0 6.5 6.0 5.5 5.0 4.5 4.0 3.5 3.0 2.5 2.0 1.5 1.0 0.5 0.0

f1 (ppm)

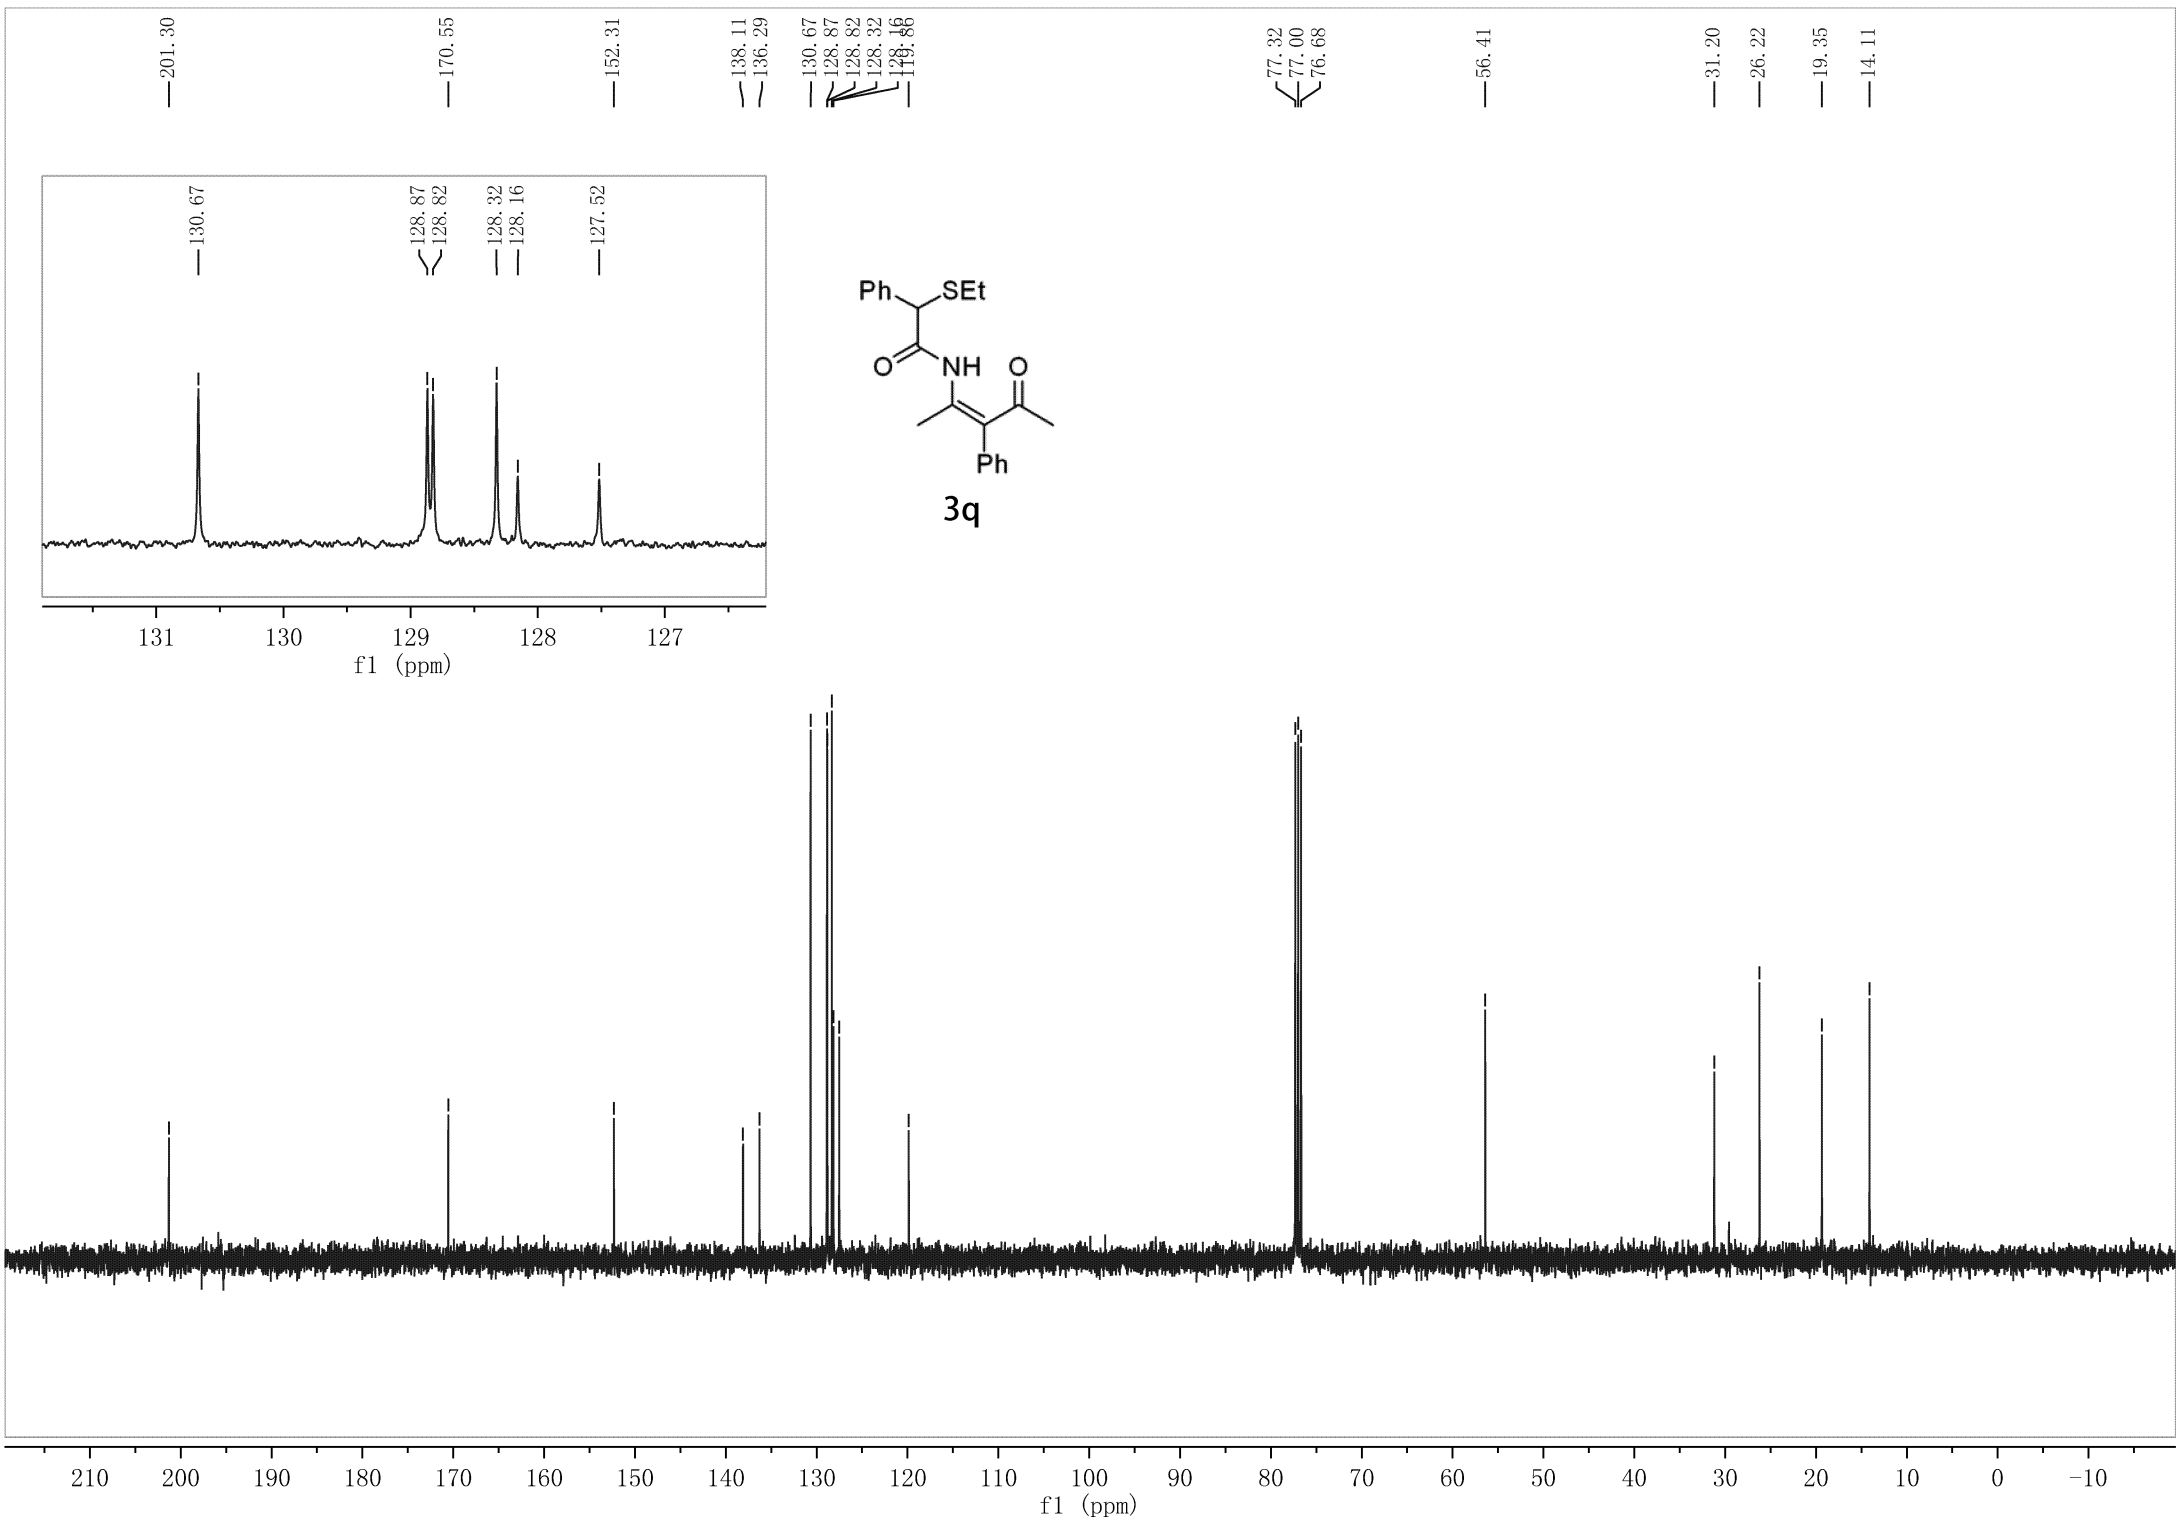



13.580

]

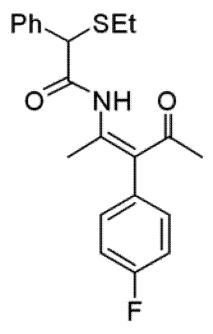

3r

7.603  
7.579  
7.562  
7.545  
7.423  
7.421  
7.403  
7.384  
7.356  
7.337  
7.319  
7.143  
7.128  
7.120  
7.114  
7.106  
7.094  
7.071

4.680

2.641  
2.623  
2.604  
2.586  
2.118  
1.906

1.326  
1.308  
1.289

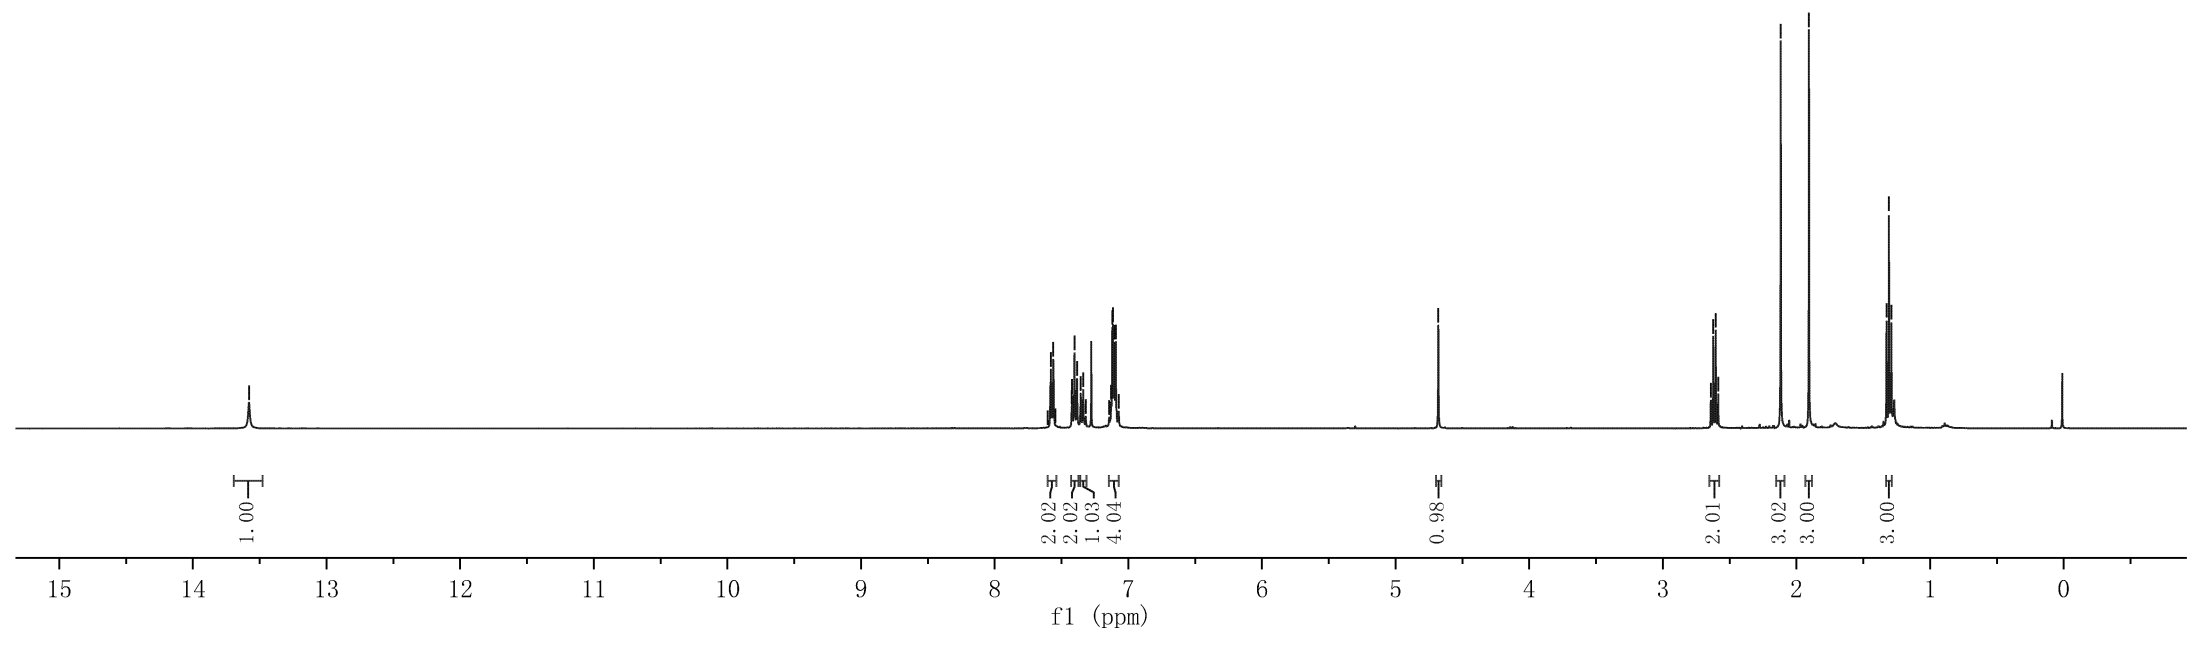

—201.02

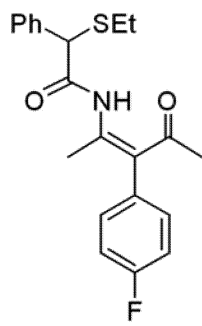

3r

—170.60  
—163.41  
—160.95  
—152.82

136.28  
134.09  
134.05  
132.45  
132.38  
128.86  
128.36  
128.21  
118.76  
116.05  
115.84

77.32  
77.00  
76.68

—56.47

—31.14  
—26.26  
—19.34  
—14.13

—136.28

134.09  
134.05

132.45  
132.38

128.86  
128.36  
128.21

—118.76

116.05  
115.84

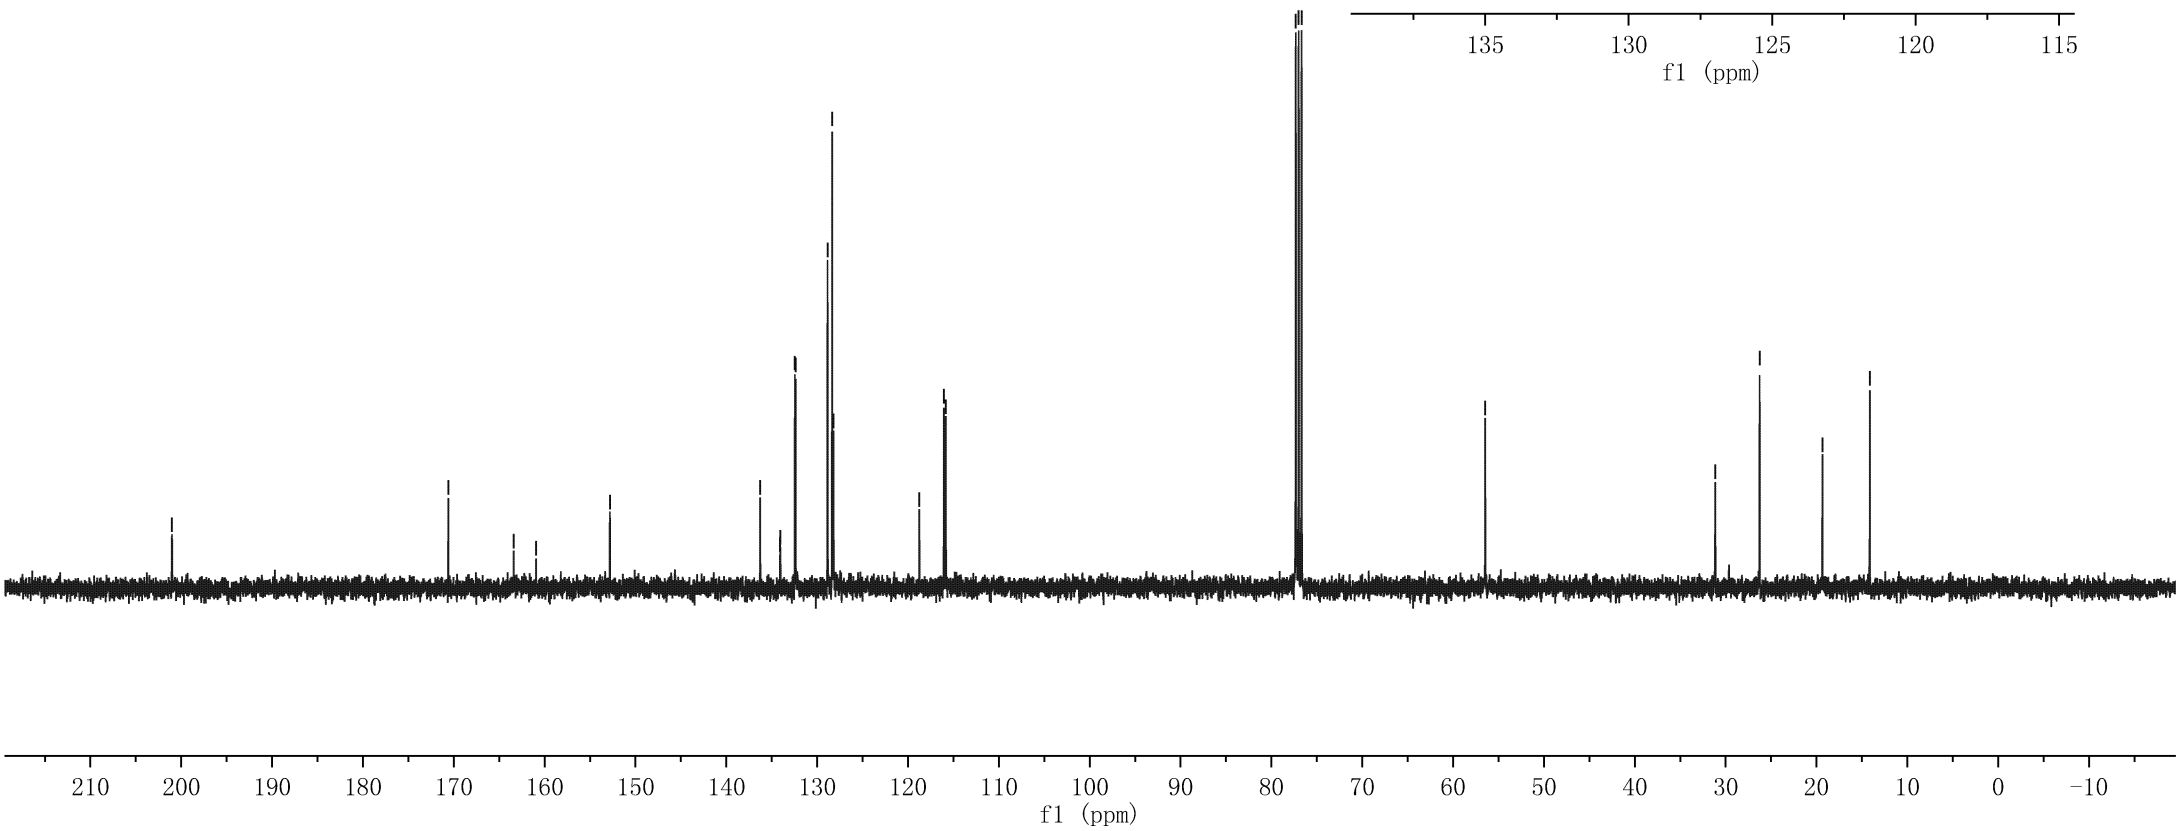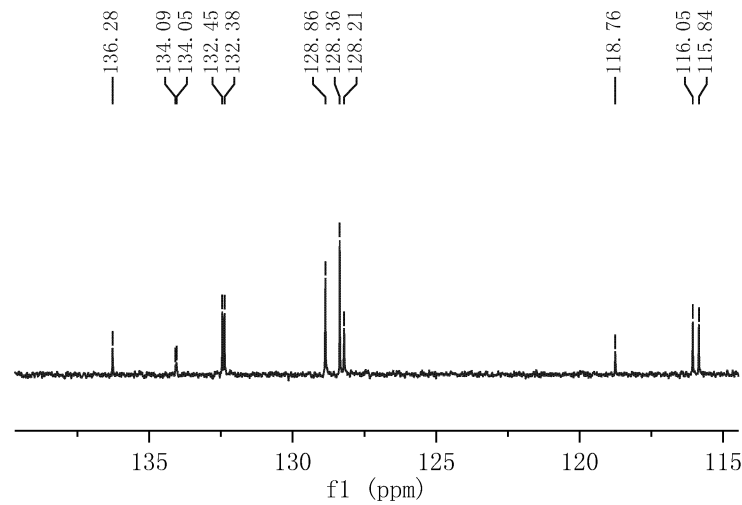

13.554

1.00

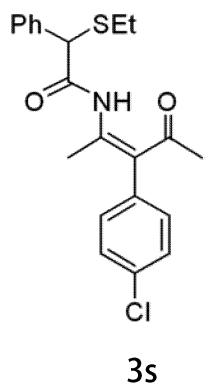

7.562  
7.544  
7.411  
7.408  
7.390  
7.383  
7.362  
7.344  
7.326  
7.307  
7.304  
7.093  
7.072

2.01  
5.06  
2.01

4.663

1.01

2.628  
2.609  
2.591  
2.572  
2.106  
1.895  
1.313  
1.295  
1.276

2.01  
3.02  
3.00  
3.01

0.000

1.00

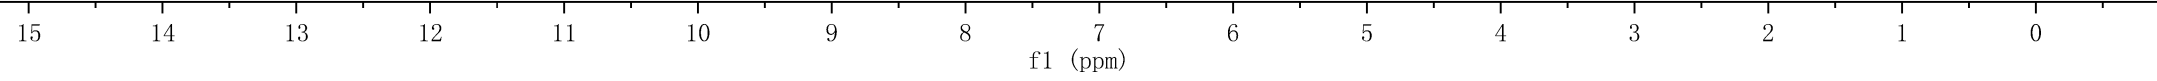

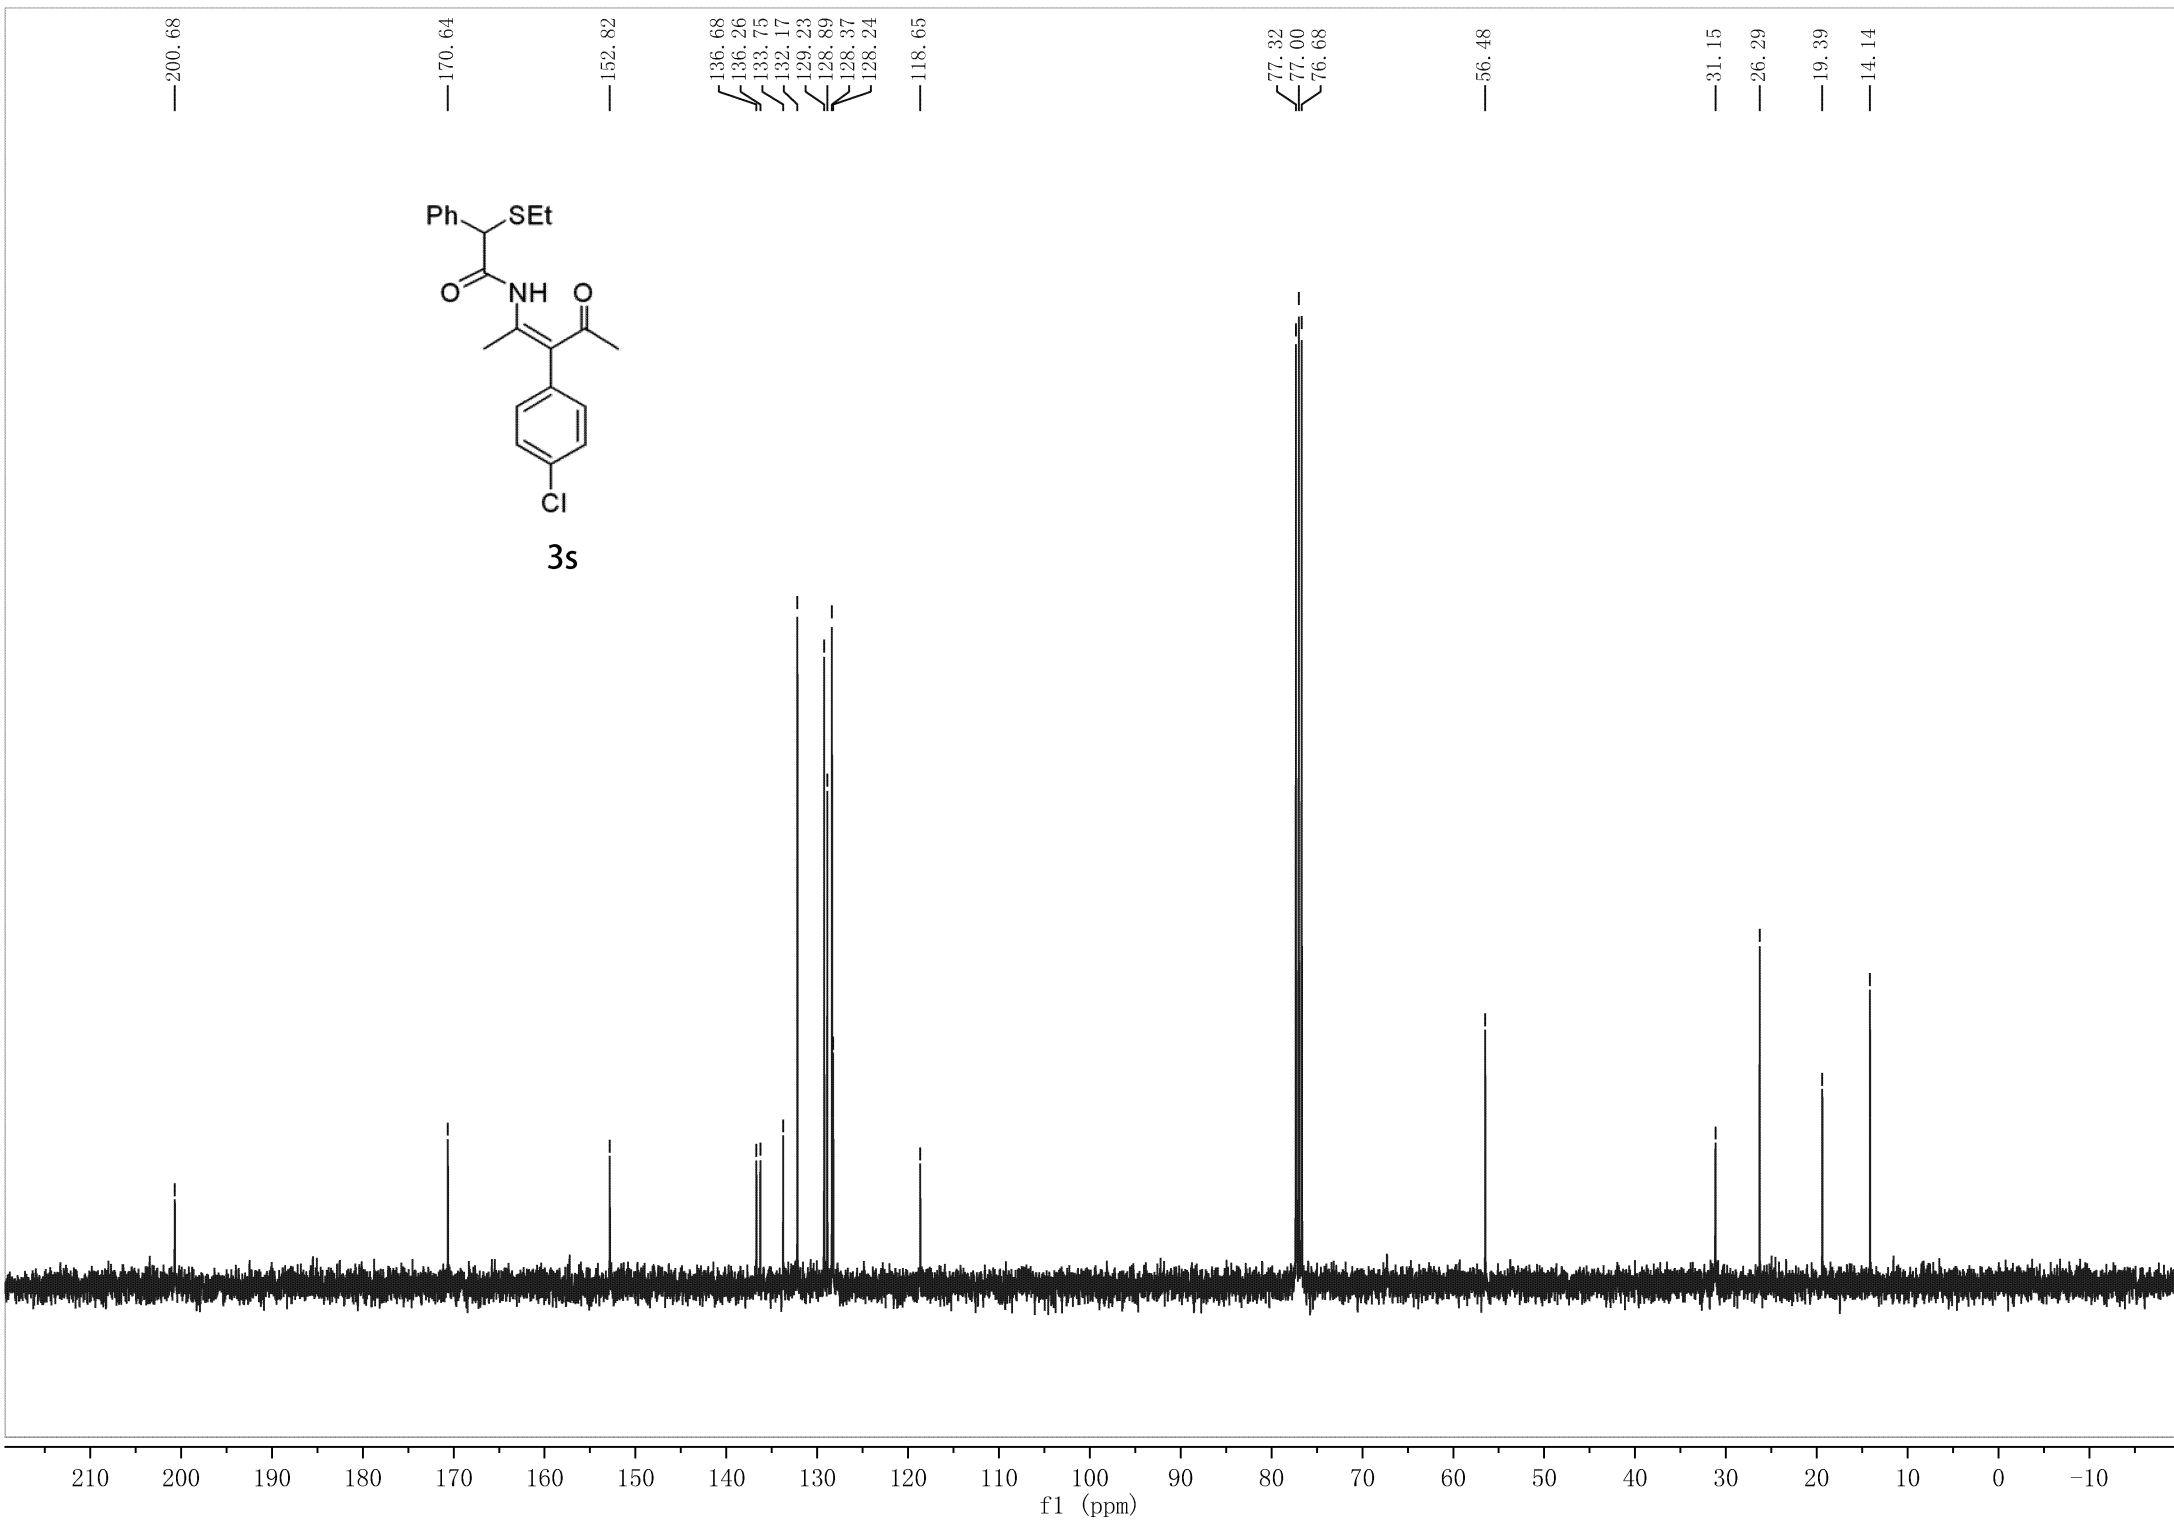

13.556

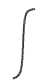

0.97

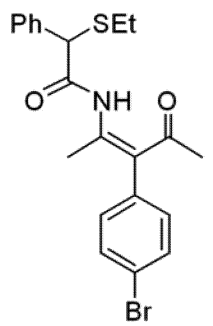

7.561  
7.538  
7.517  
7.407  
7.389  
7.370  
7.343  
7.325  
7.307  
7.034  
7.013

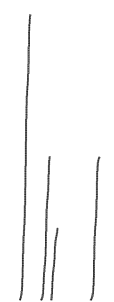

4.00  
2.01  
1.01  
2.01

4.663

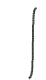

0.98

2.627  
2.608  
2.590  
2.571

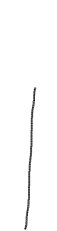

1.98

2.105  
1.896

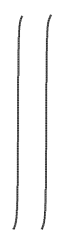

2.98  
3.00

1.312  
1.294  
1.275

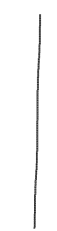

3.01

0.000

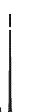

15 14 13 12 11 10 9 8 7 6 5 4 3 2 1 0

f1 (ppm)

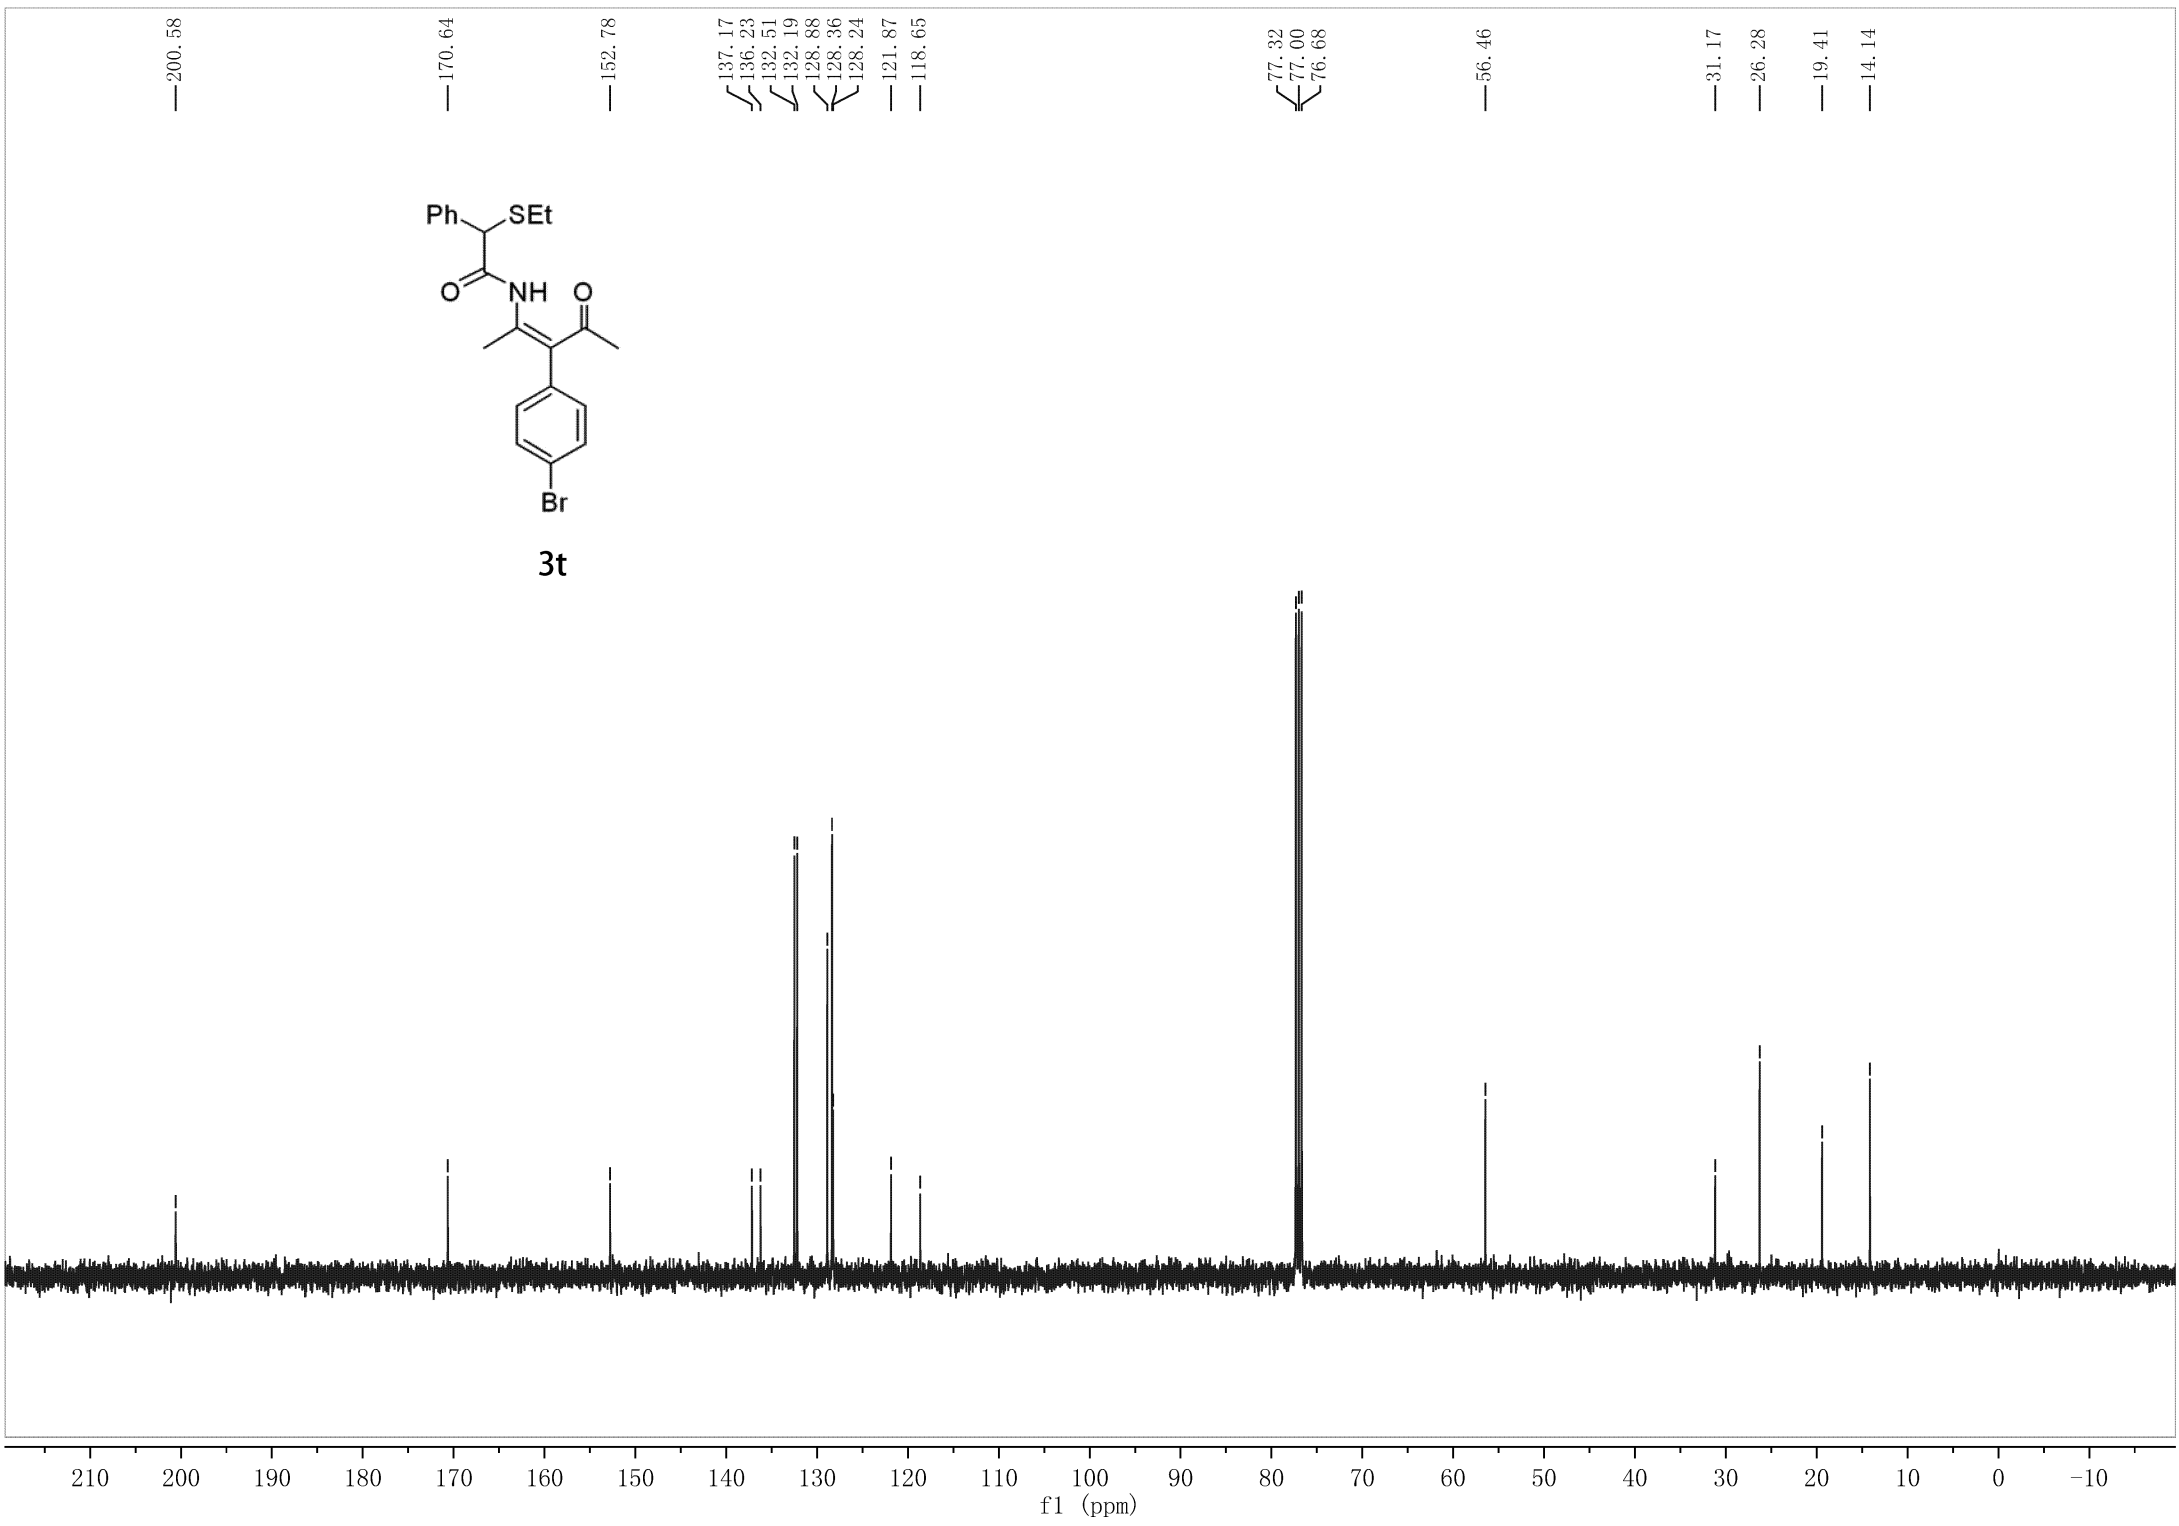

13.562

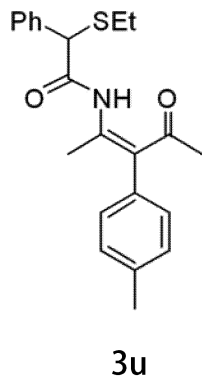

7.570  
7.553  
7.405  
7.387  
7.368  
7.338  
7.320  
7.302  
7.195  
7.176  
7.018  
6.998

4.665

2.630  
2.611  
2.593  
2.574  
2.369  
2.107  
1.906  
1.314  
1.296  
1.277

0.000

0.97

2.02  
2.01  
1.02  
2.01  
1.98

0.98

2.01  
3.00  
3.00  
3.00

3.03

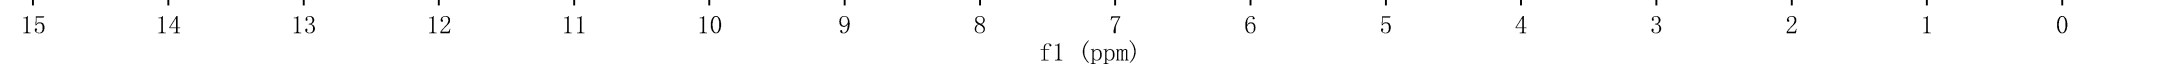

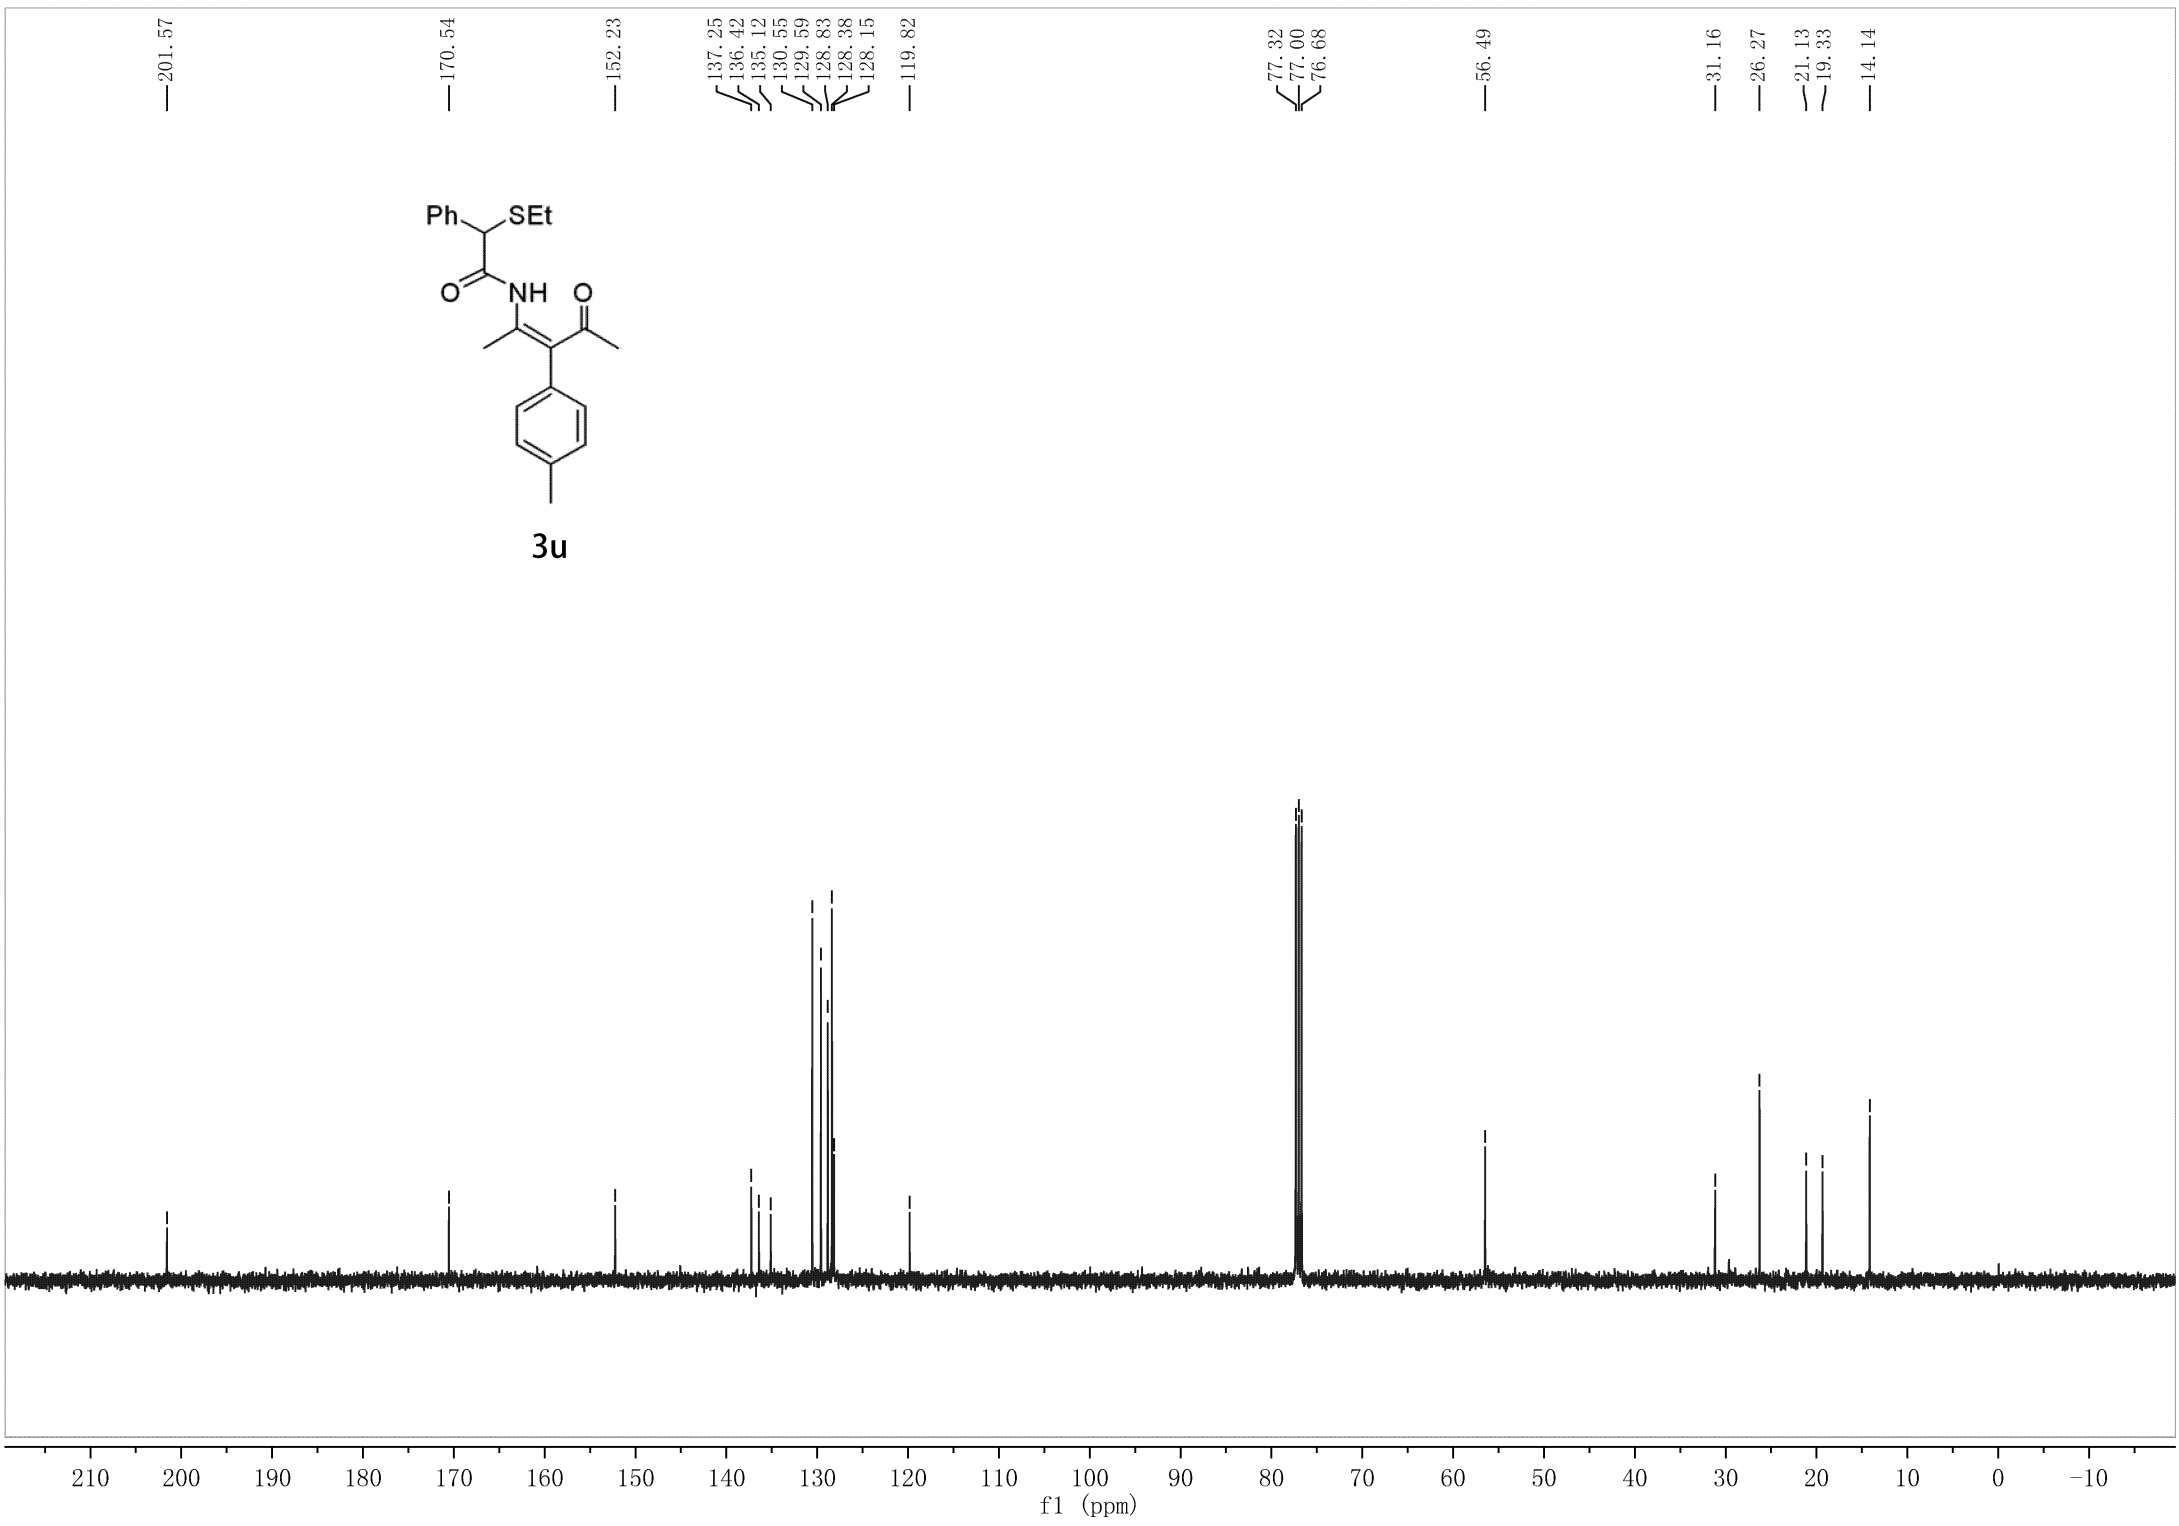



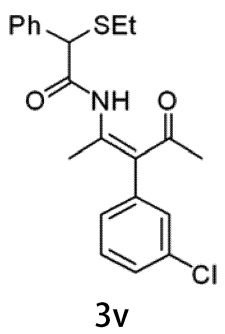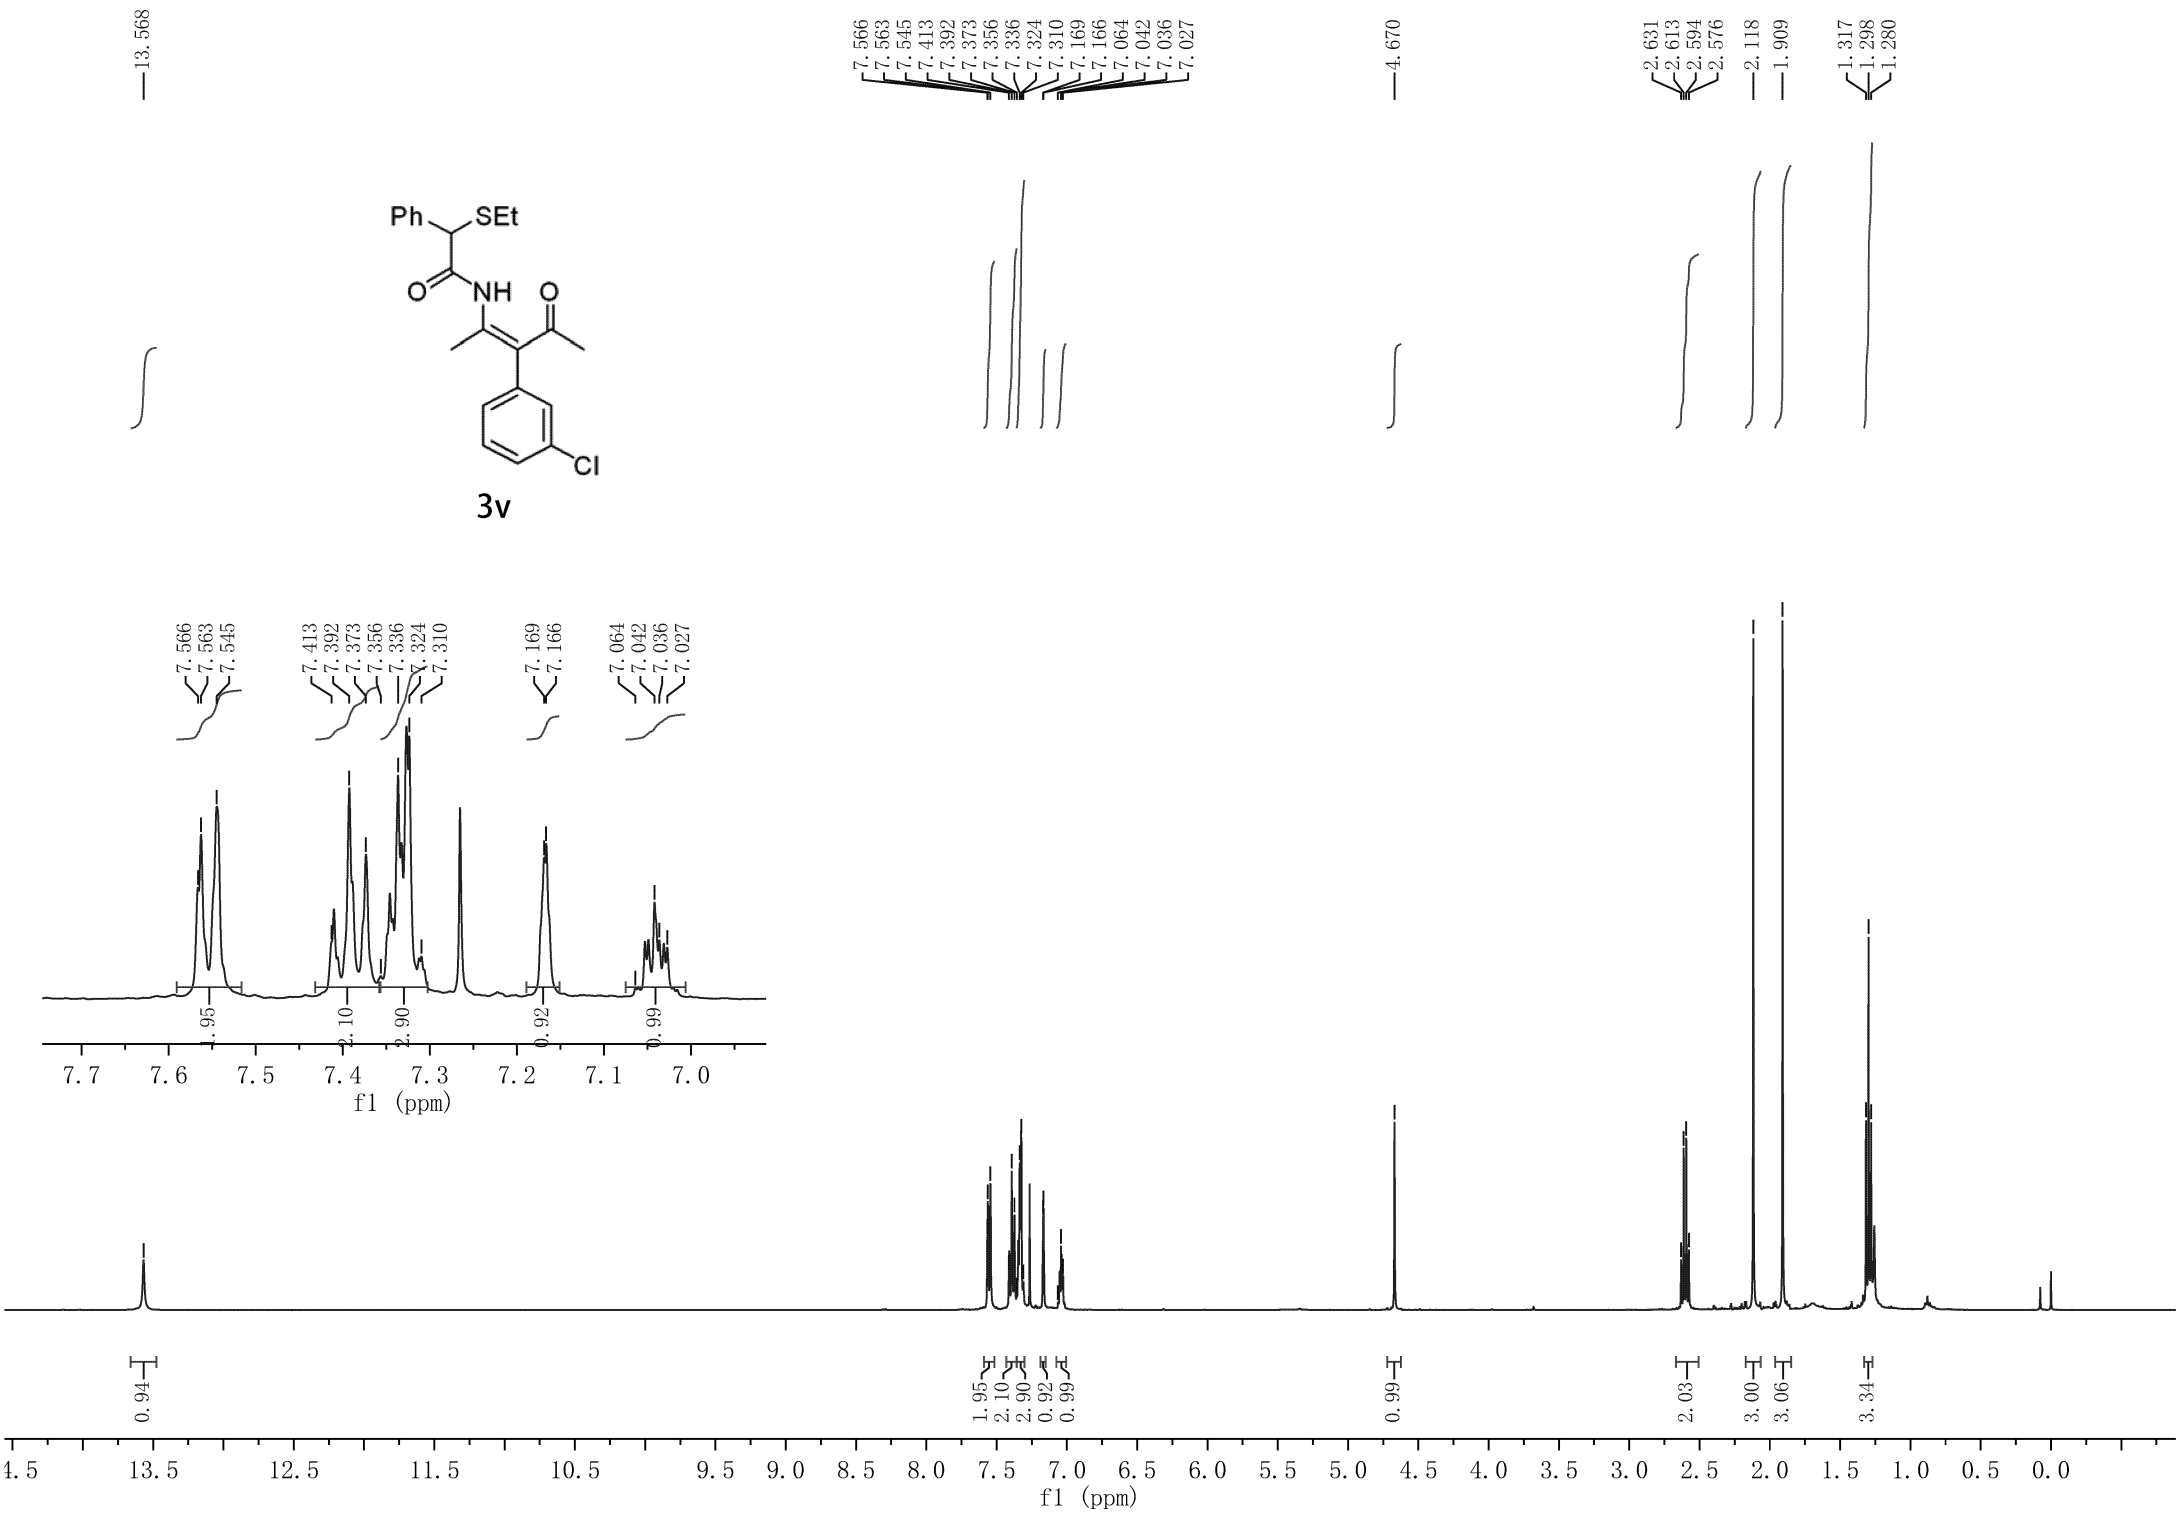

—200.46

—170.65

—152.97

140.06  
136.20  
134.72  
130.84  
130.21  
129.05  
128.88  
128.34  
128.23  
127.89  
—118.62

77.32  
77.00  
76.68

—56.46

—31.11

—26.27

—19.42

—14.13

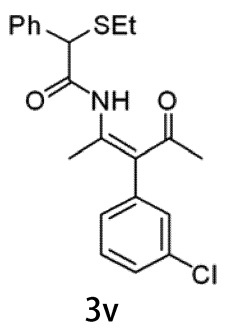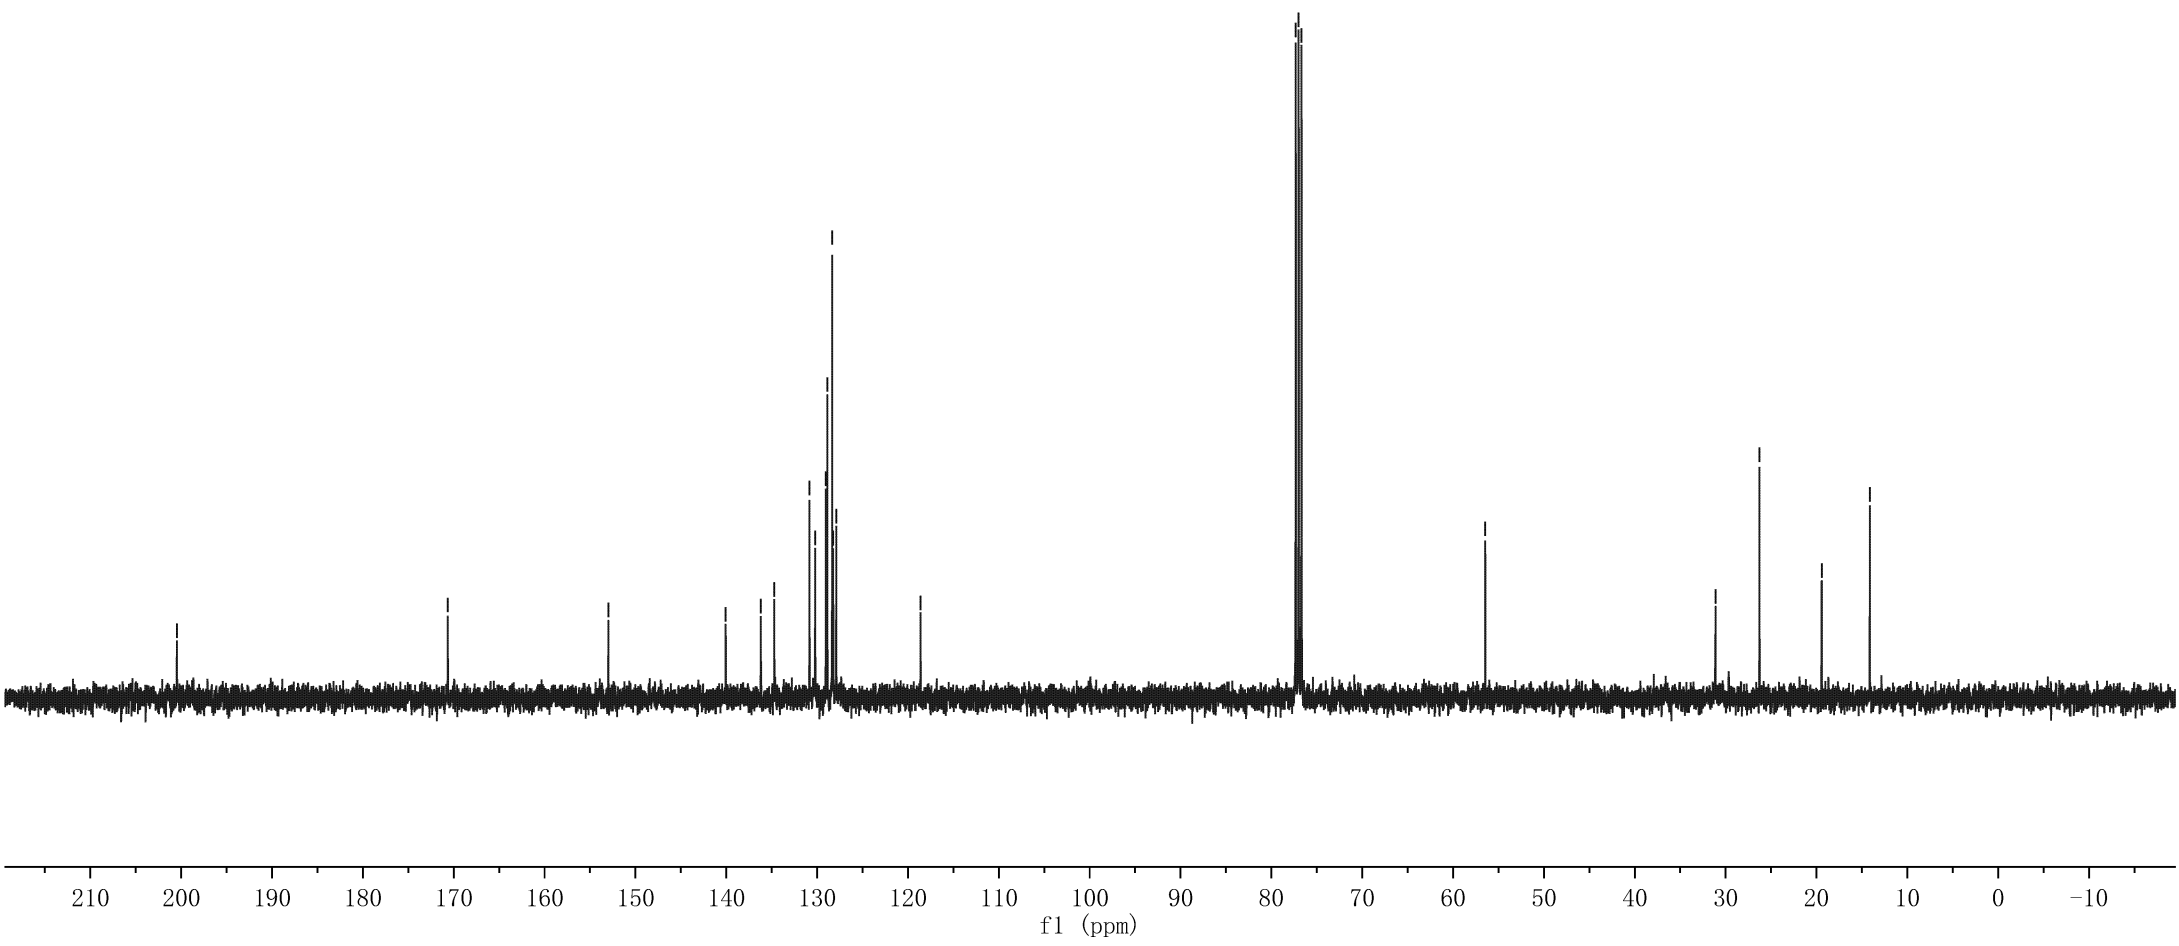

13.563

7.571  
7.553  
7.408  
7.390  
7.371  
7.342  
7.324  
7.305  
7.284  
7.263  
7.246  
7.147  
7.128  
6.949  
6.935  
6.915

4.667

2.632  
2.614  
2.595  
2.577  
2.353  
2.109  
1.909  
1.317  
1.299  
1.280

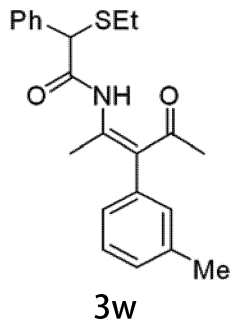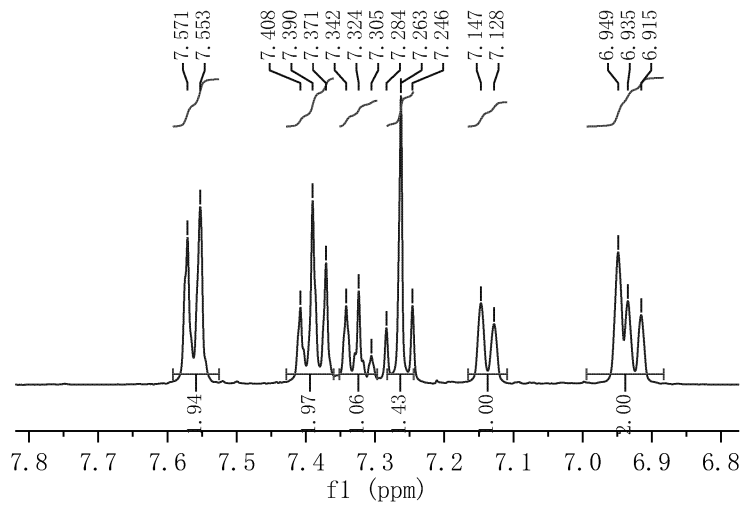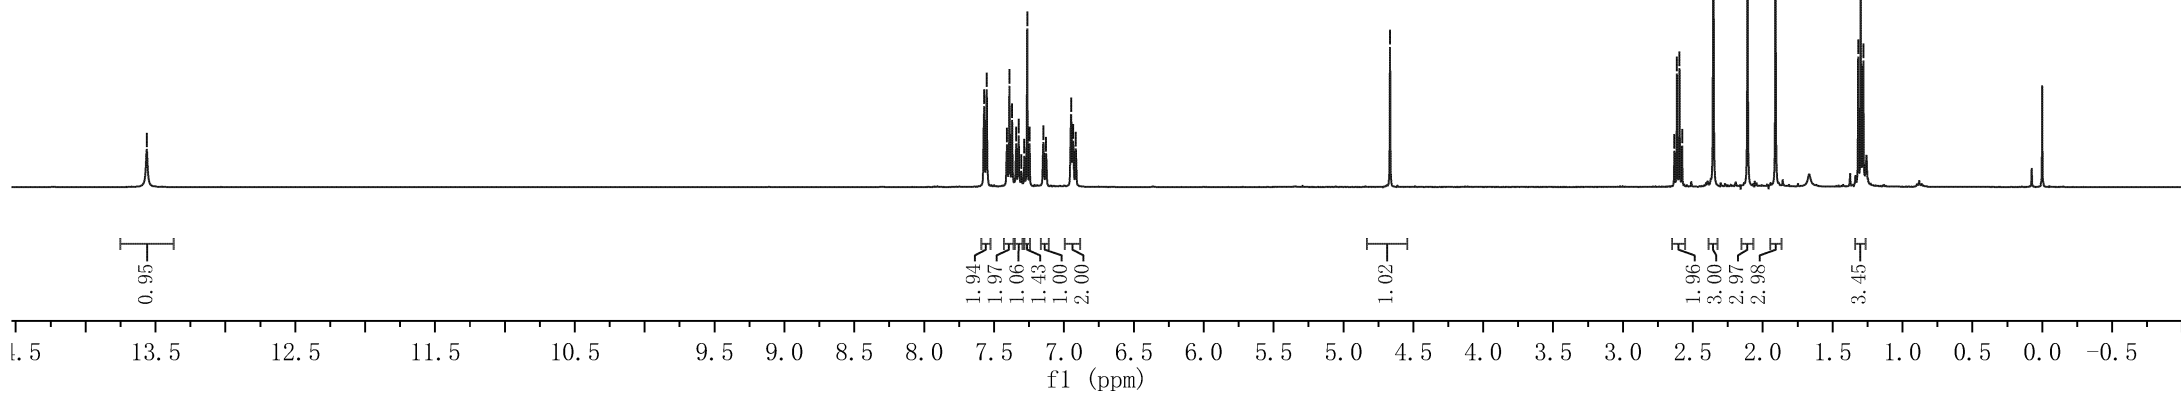

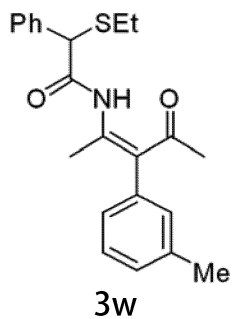

**3w**

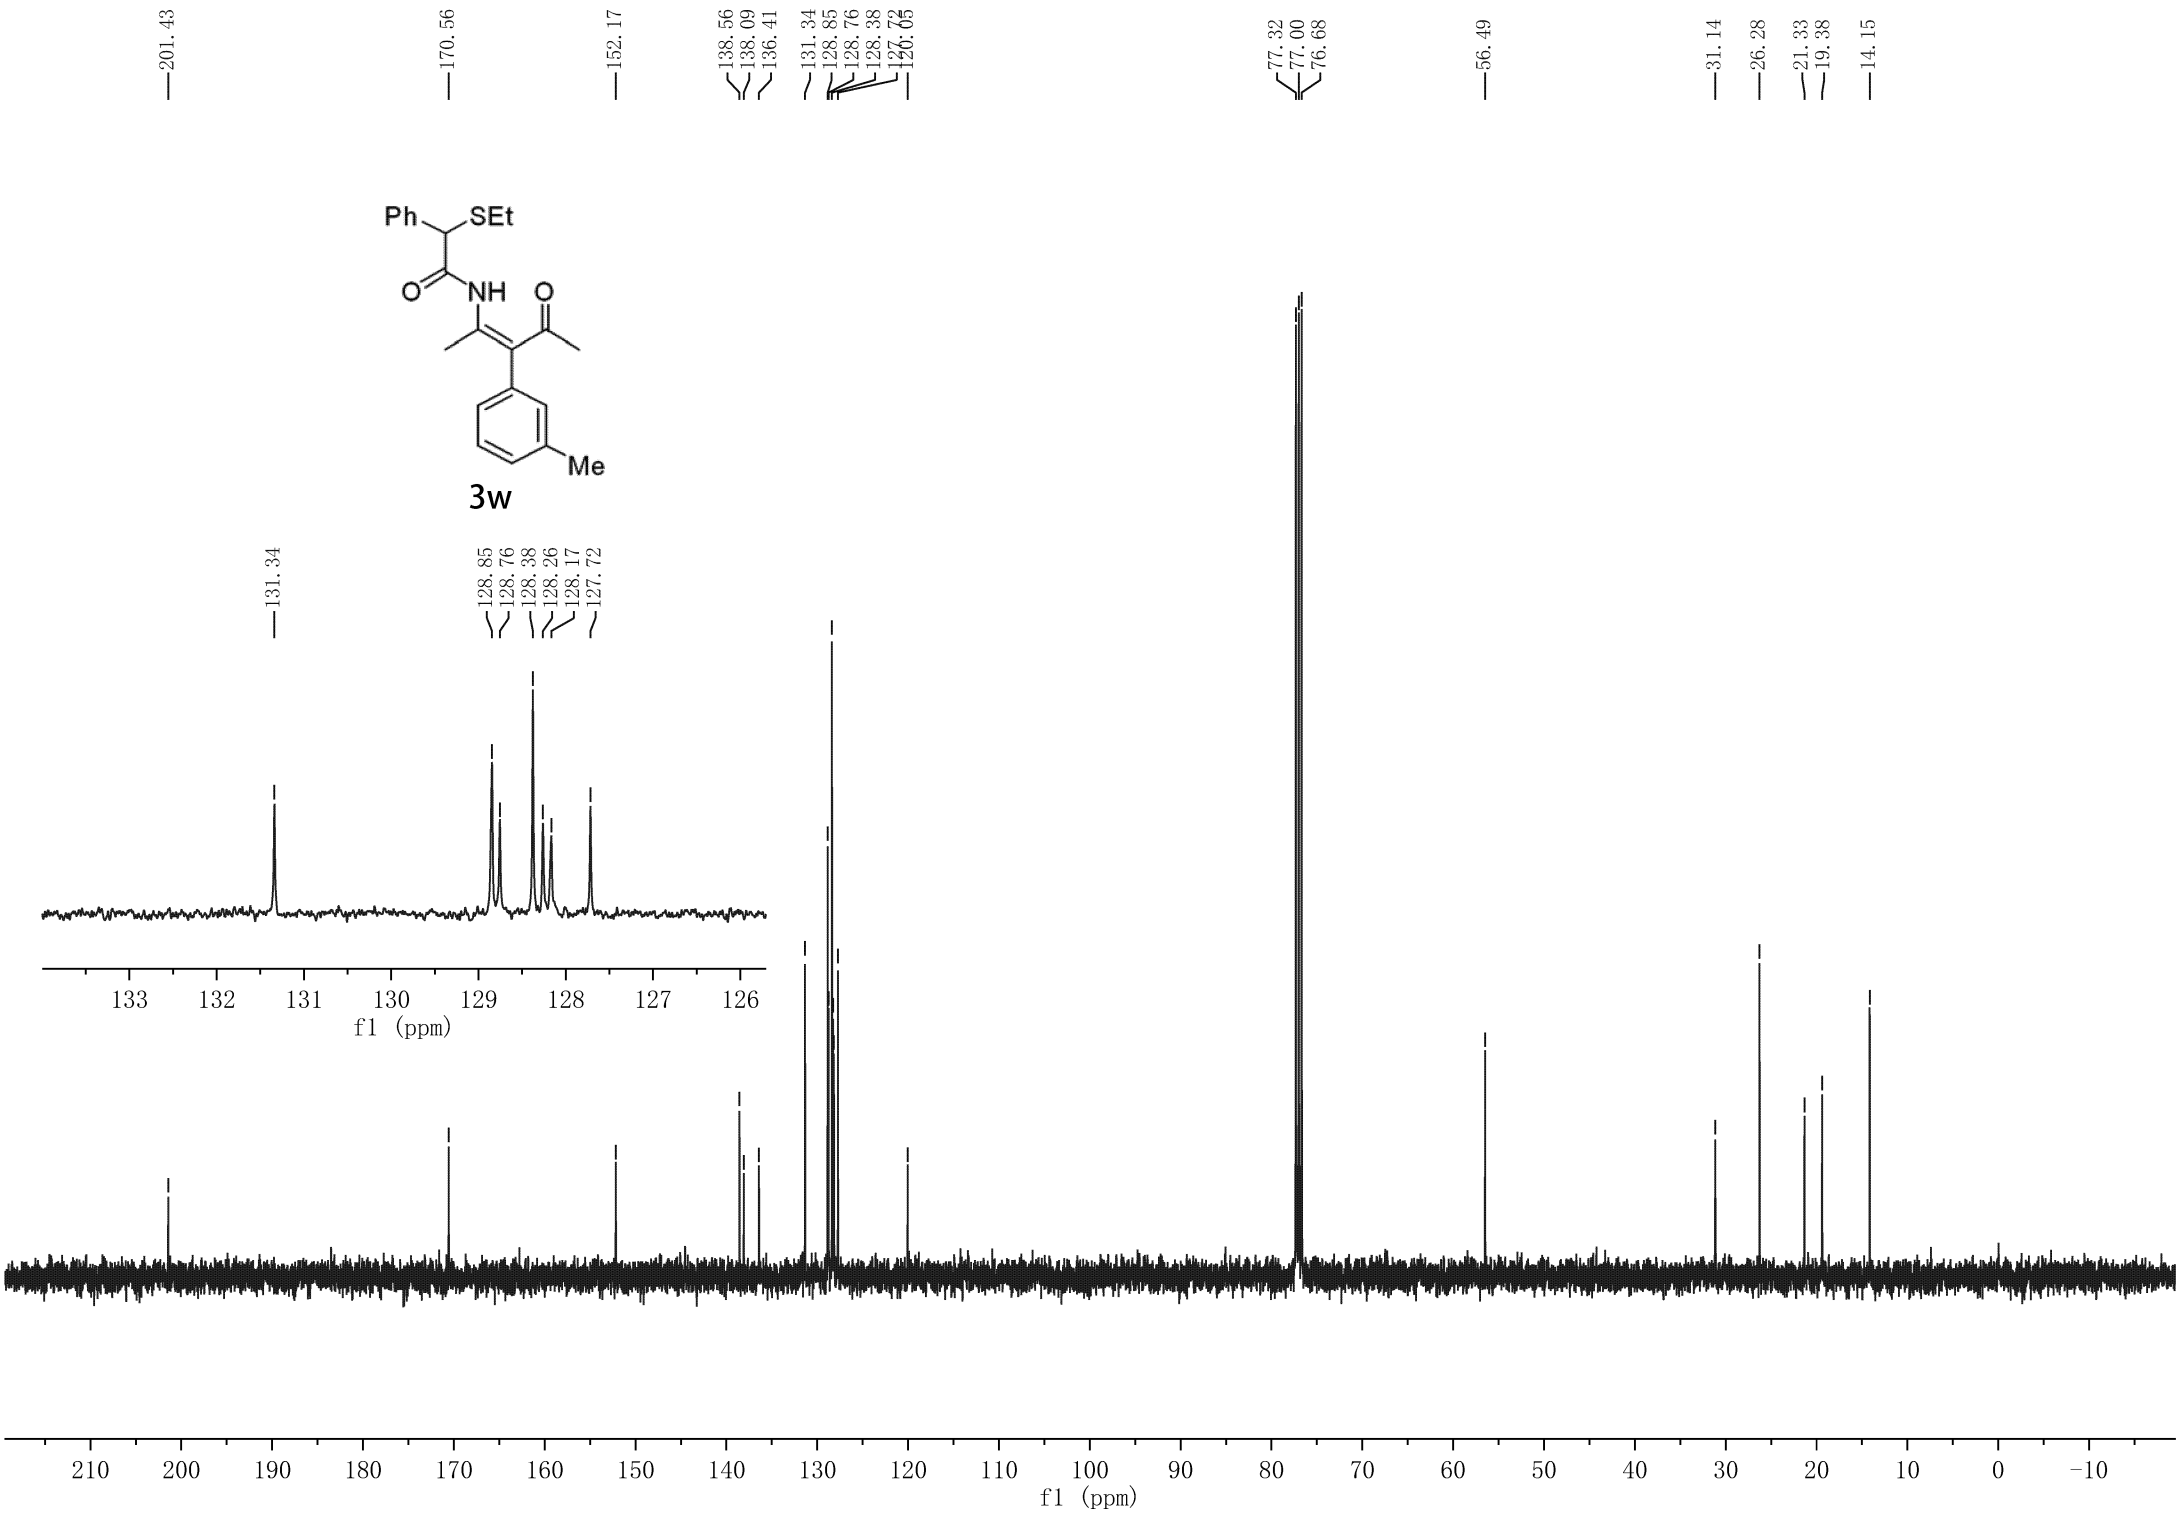

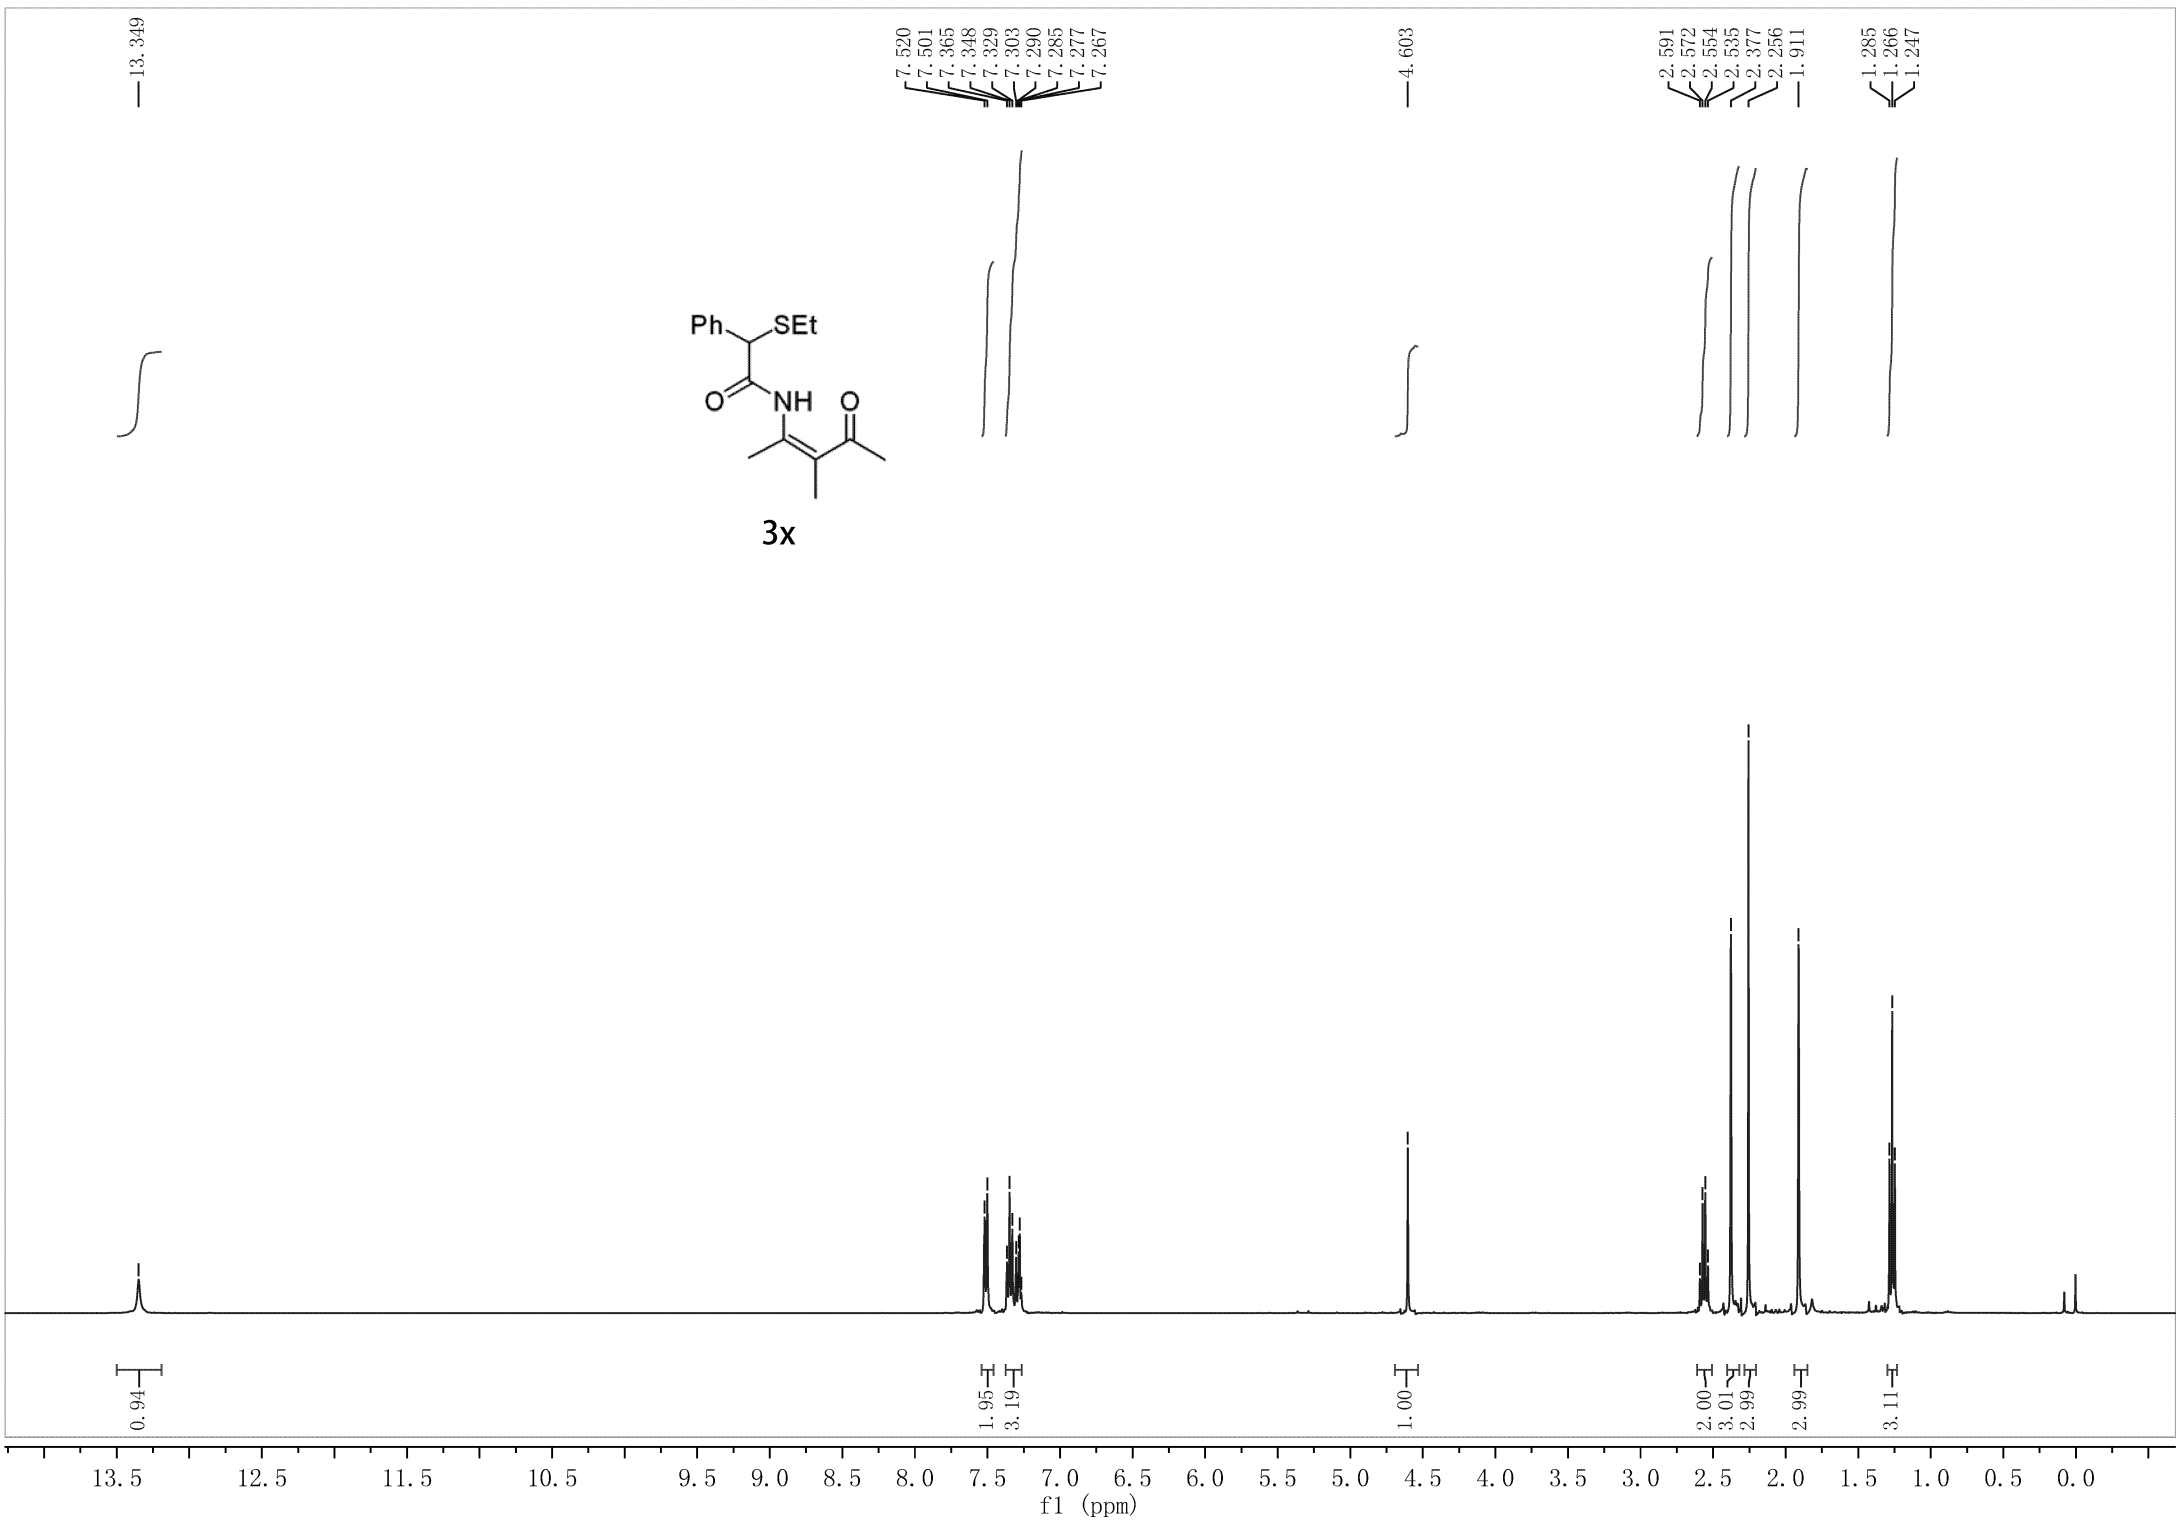

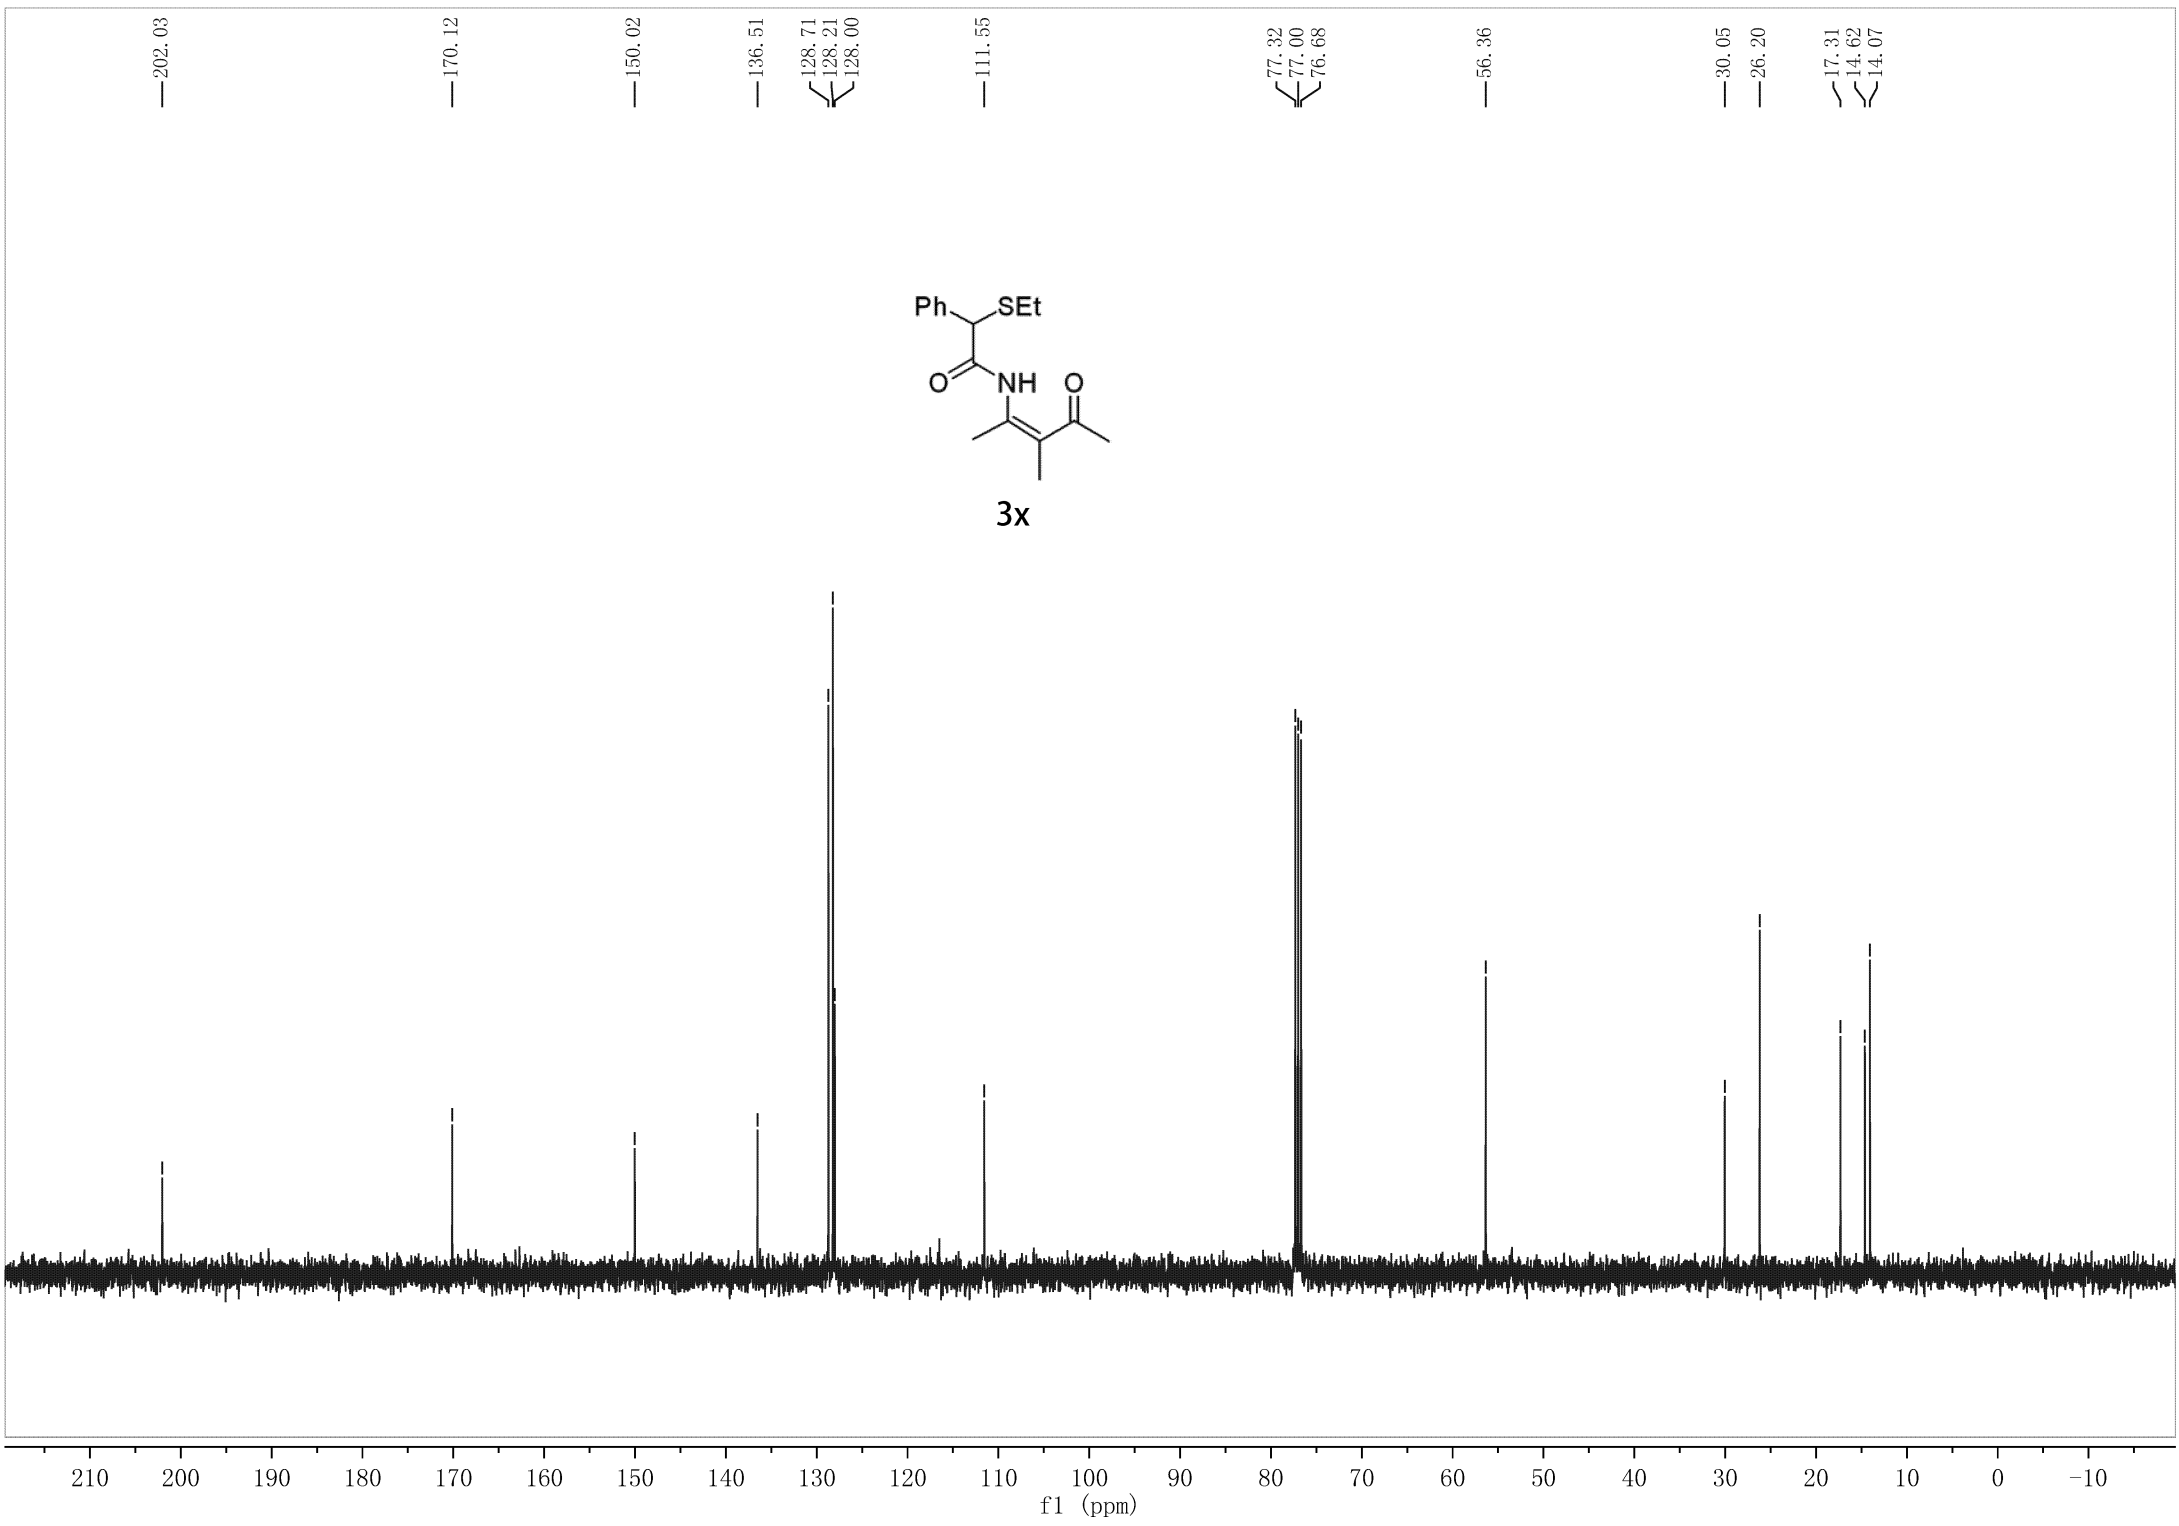

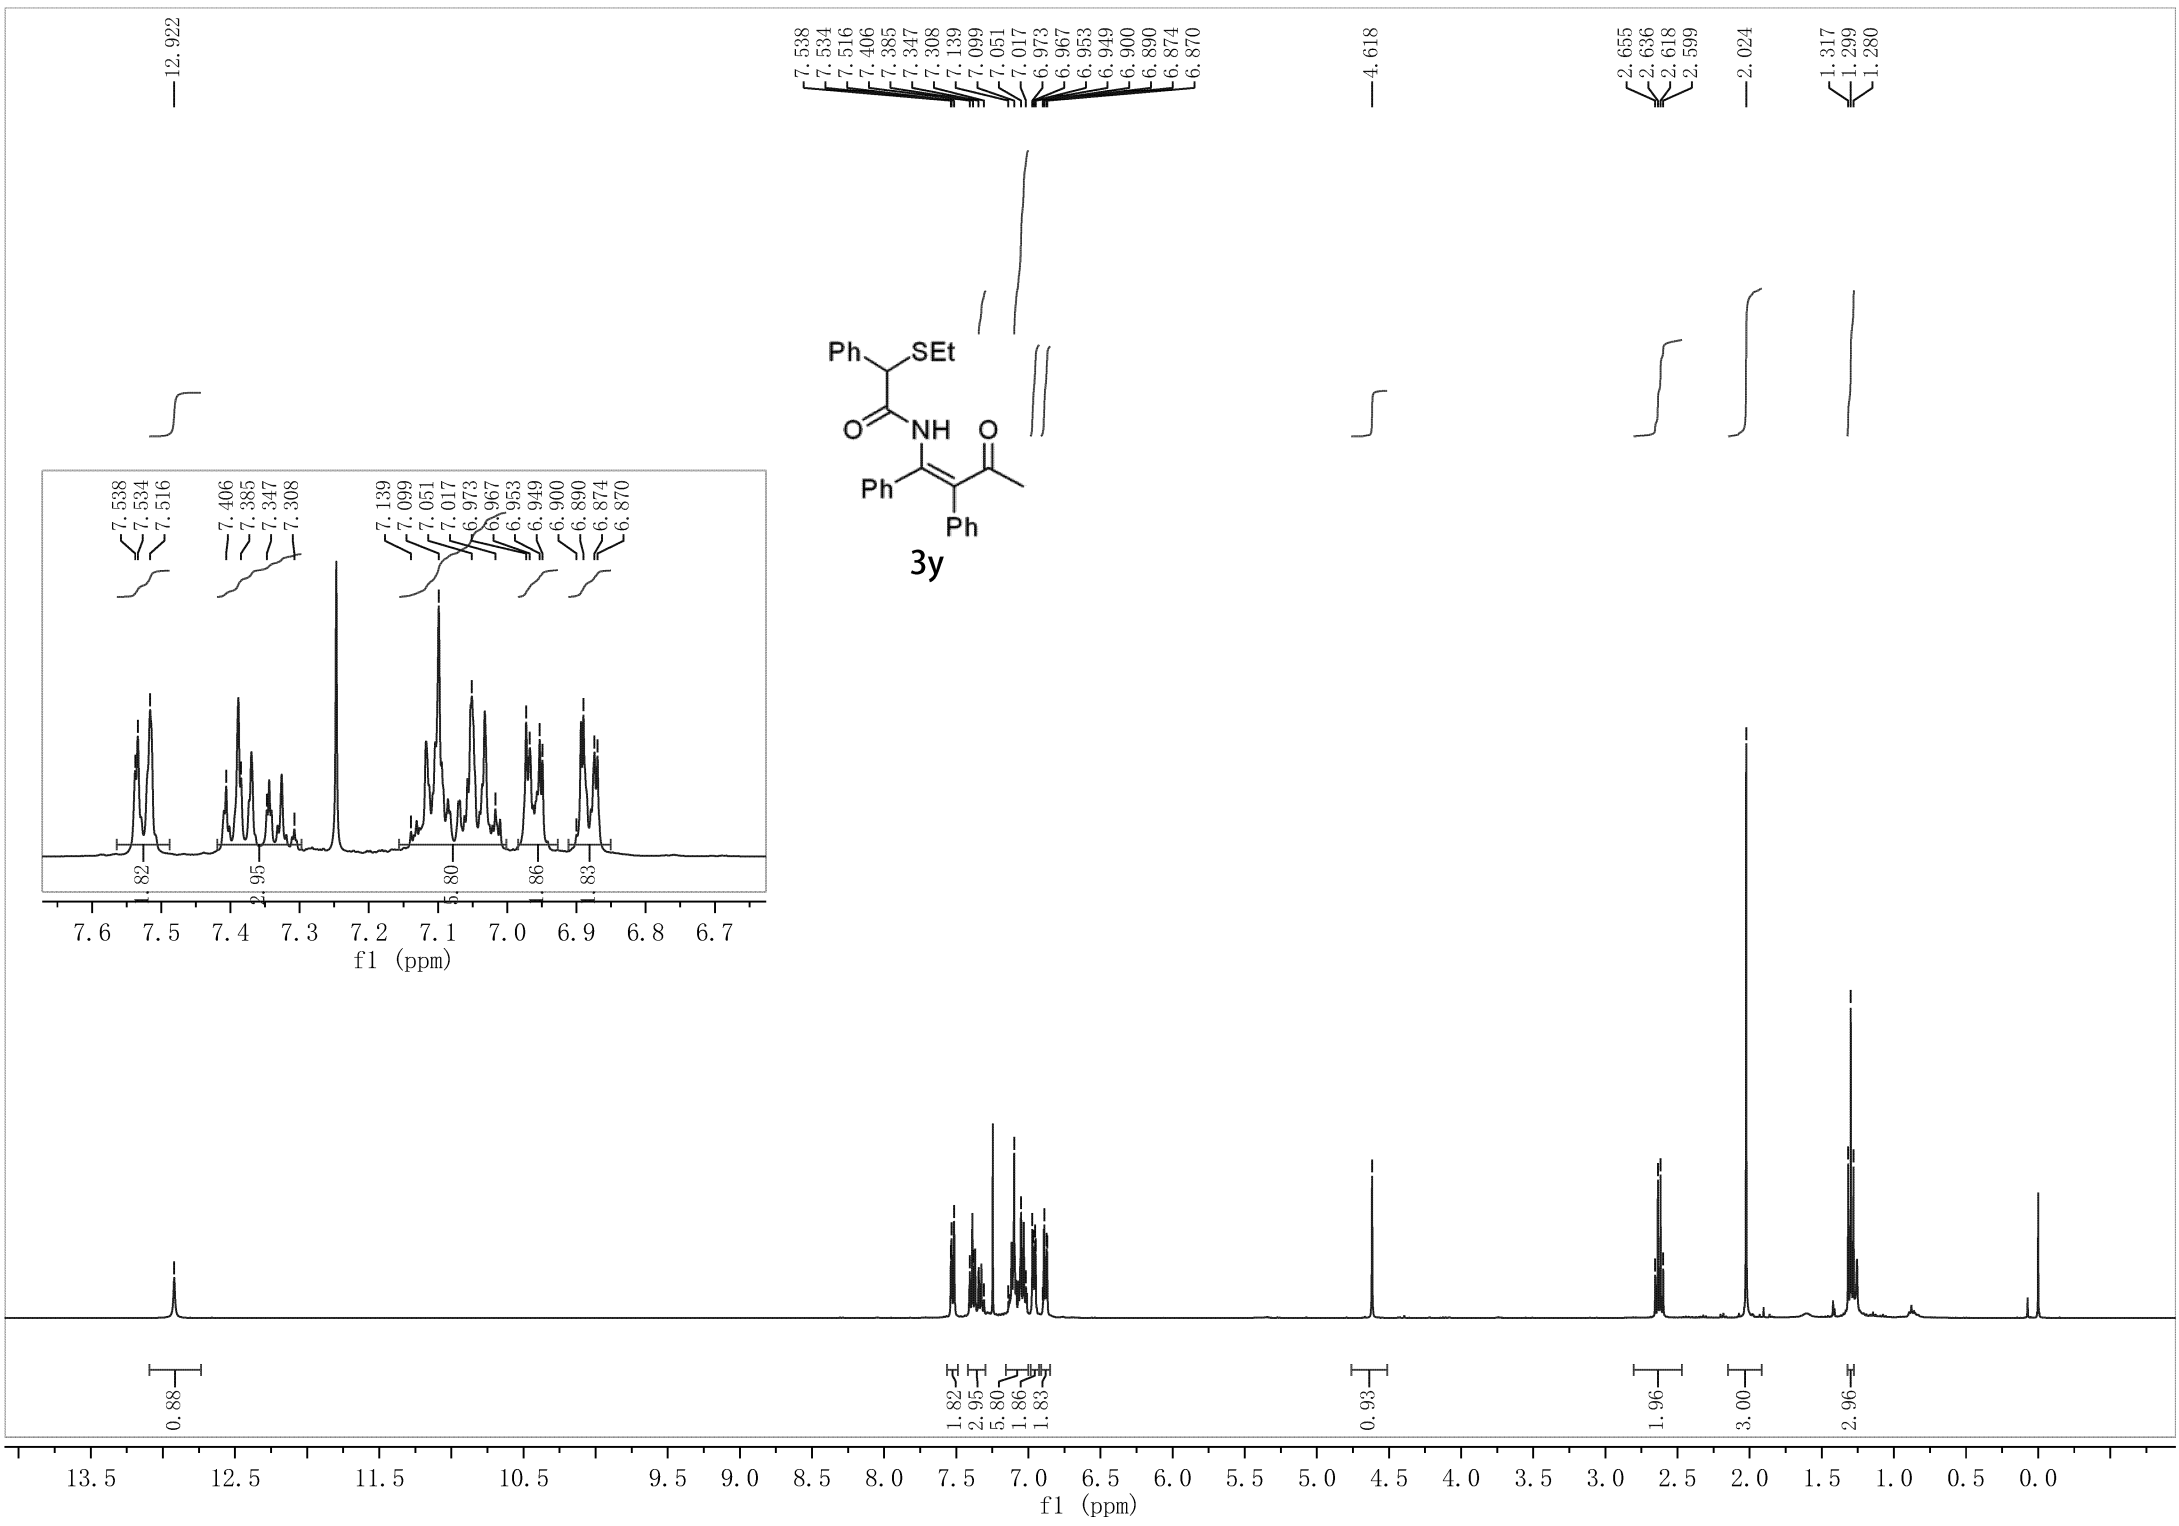

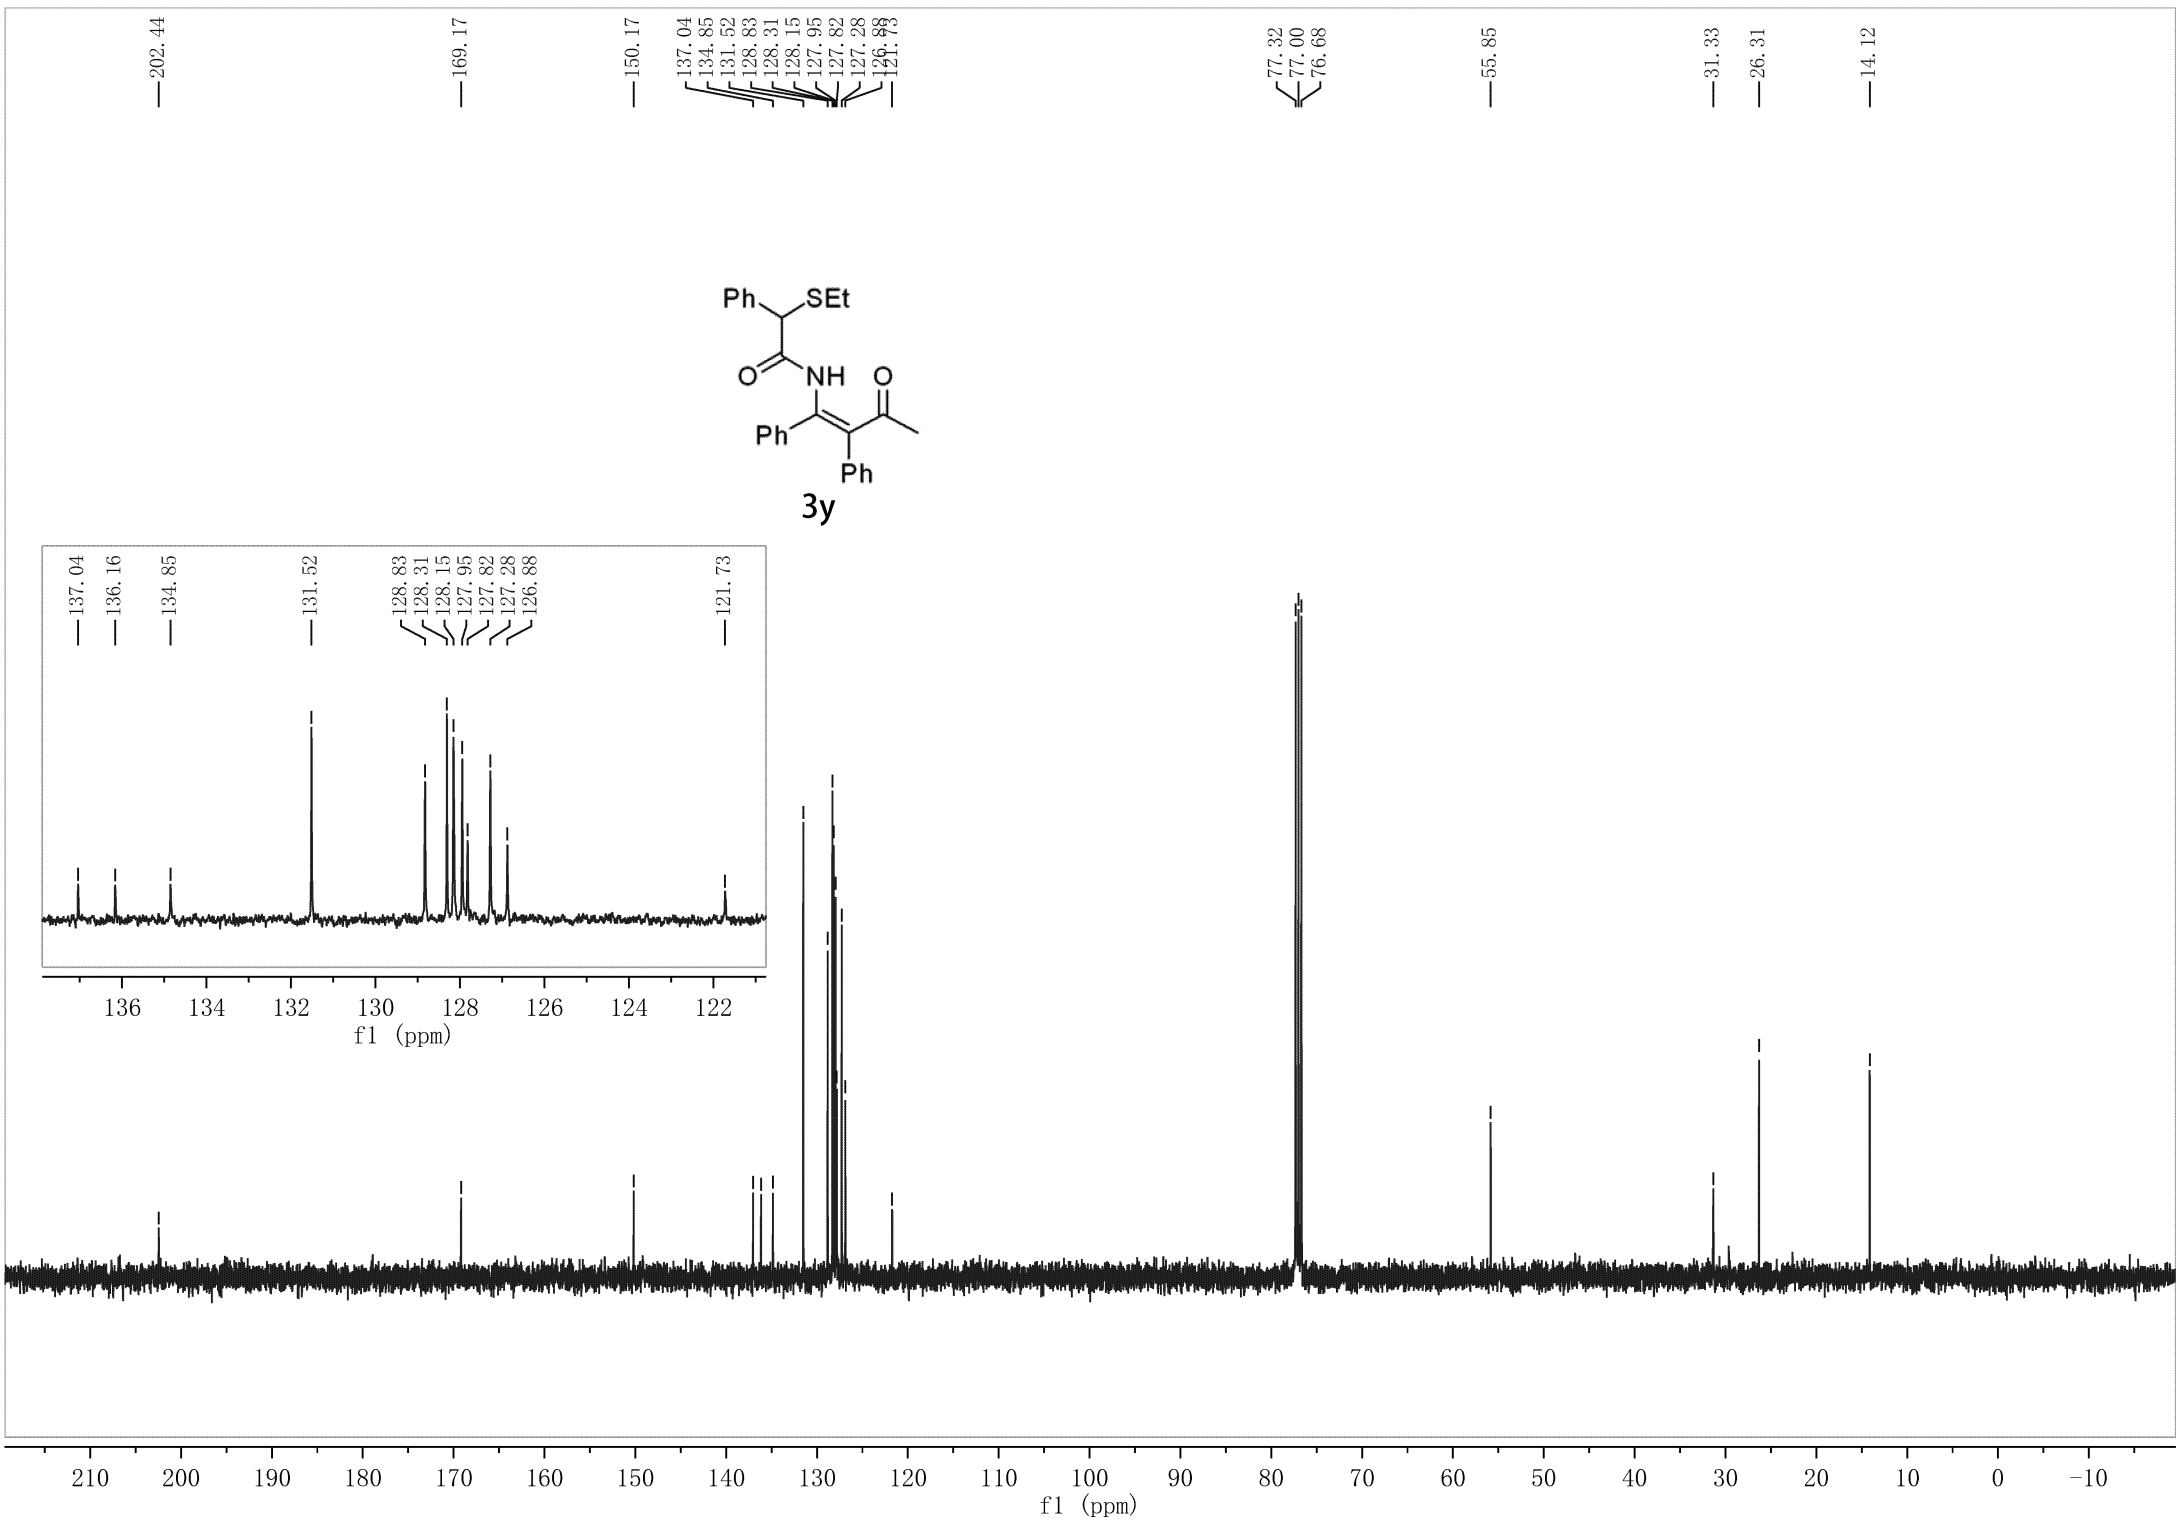



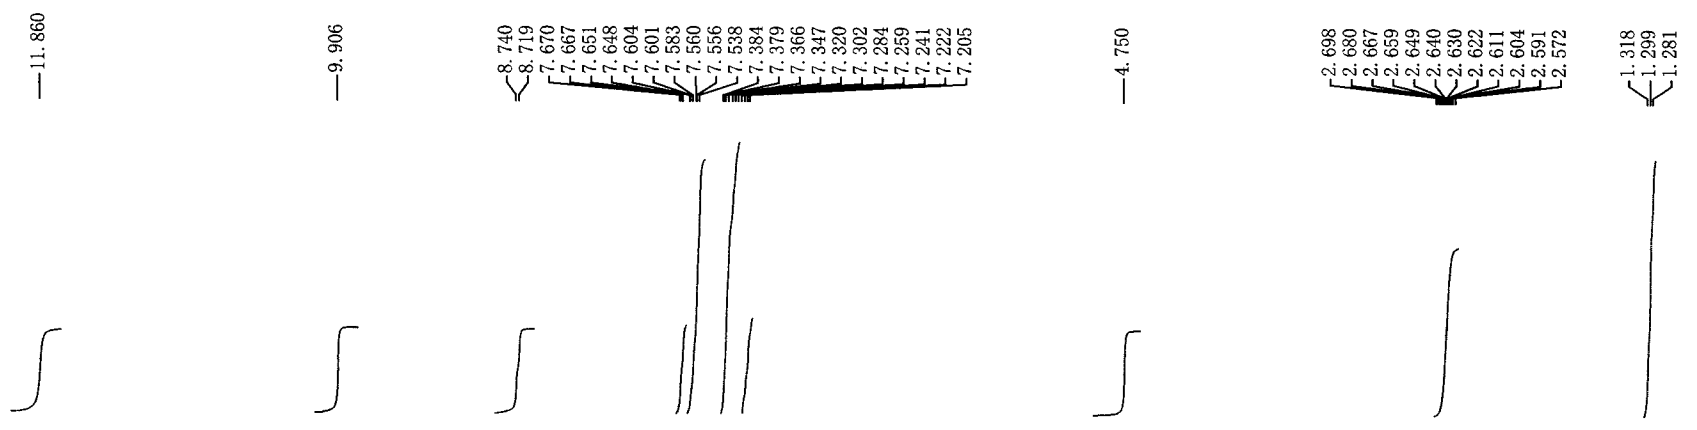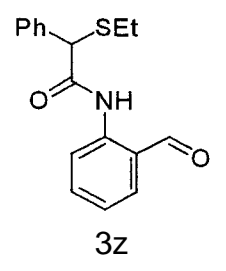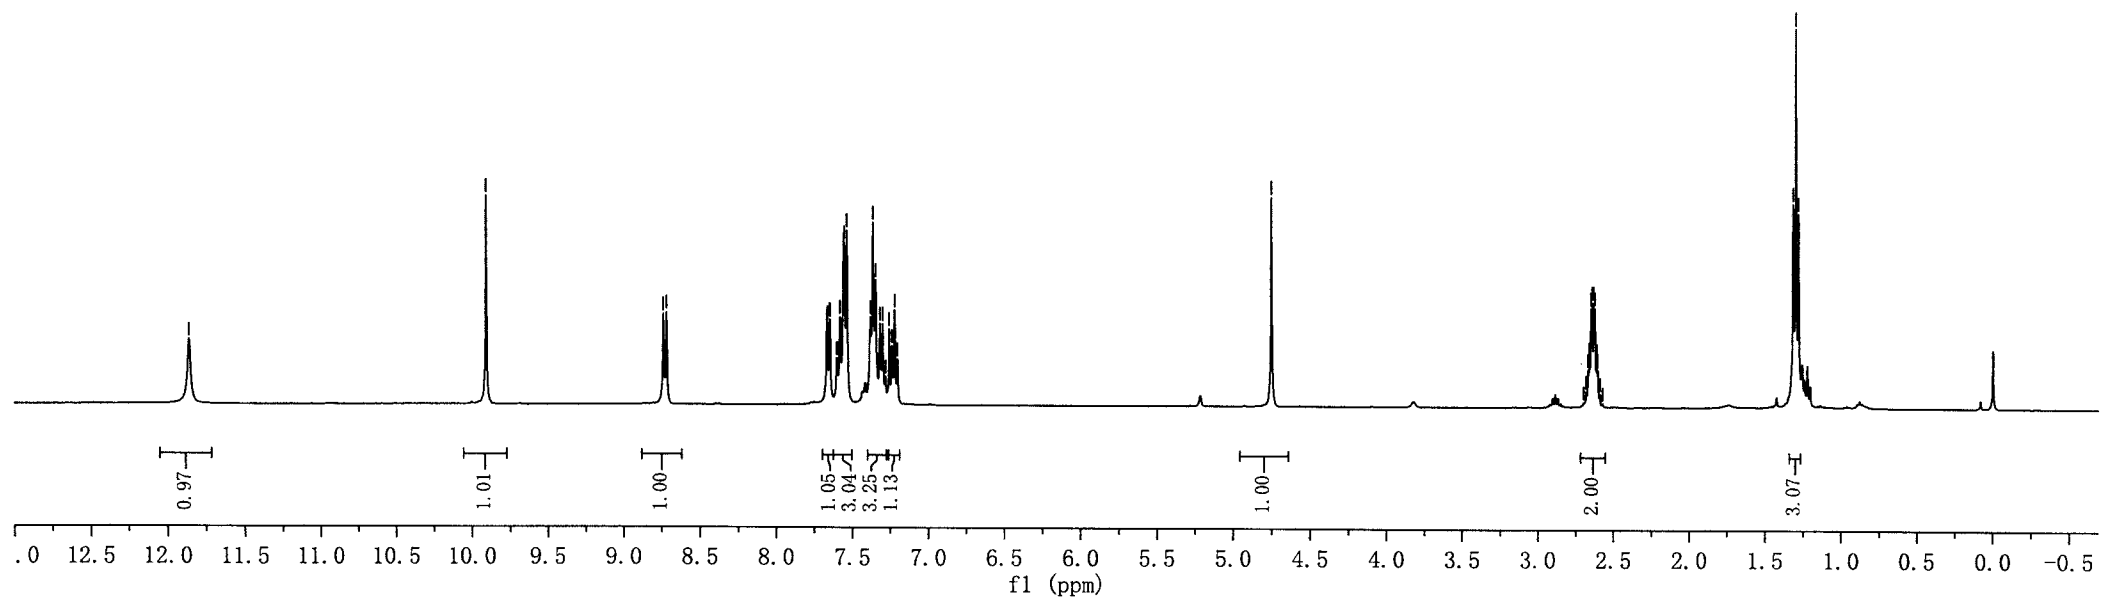

—195.15

—170.09

140.30  
136.36  
135.96  
135.90  
128.85  
128.20  
128.16  
123.26  
122.13  
119.92

77.32  
77.00  
76.68

—56.13

—26.47

—14.07

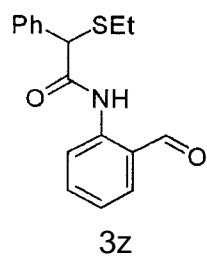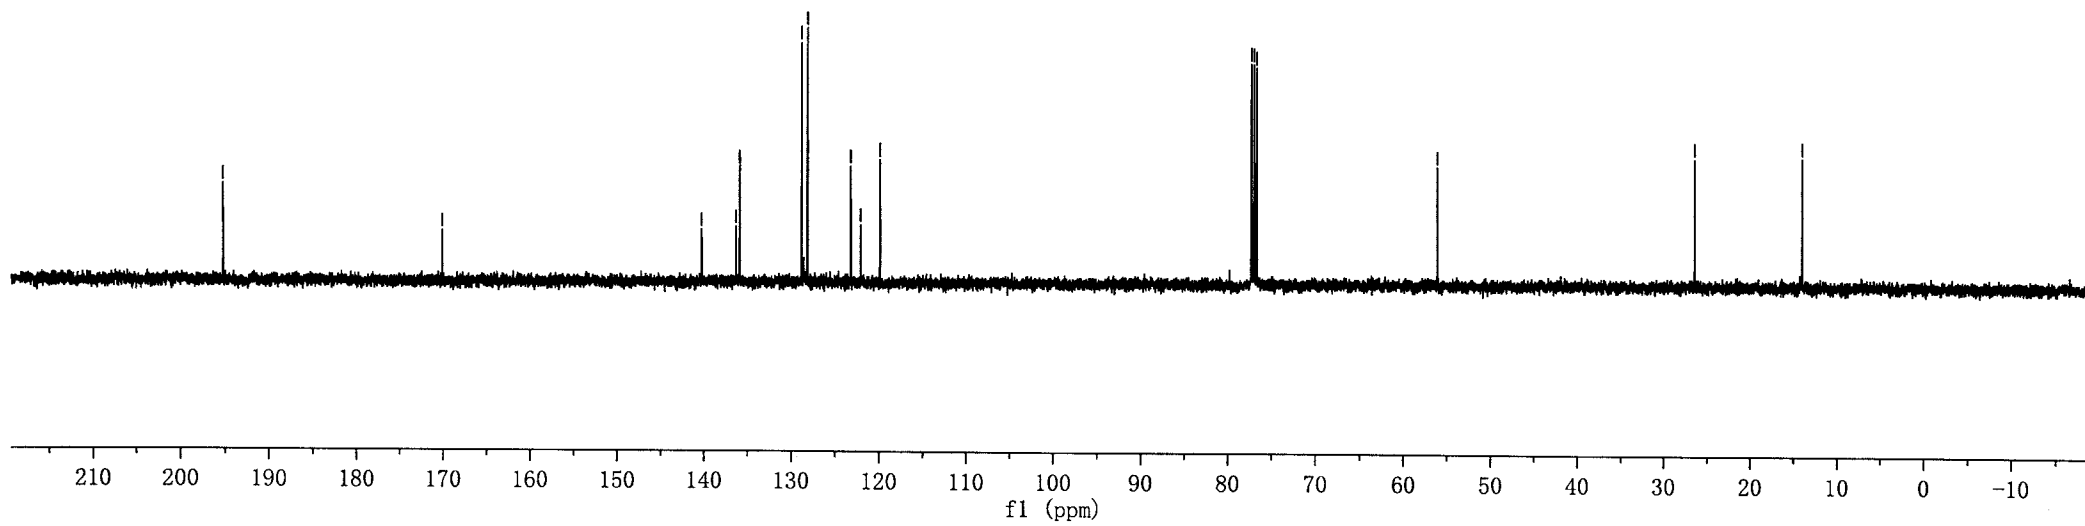

—195.15

—135.96  
—135.90  
—128.85  
—128.20  
—128.16  
—123.26  
—119.92

—56.14

—26.47

—14.07

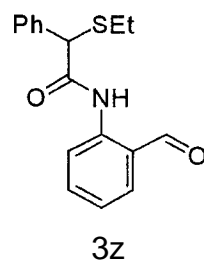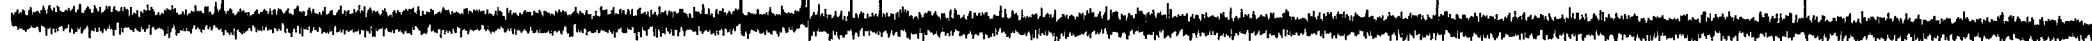

210 200 190 180 170 160 150 140 130 120 110 100 90 80 70 60 50 40 30 20 10 0 -10  
f1 (ppm)

12.345

7.387  
7.369  
7.351  
7.341  
7.323  
7.319  
7.298  
7.290  
7.281  
7.260

5.304

3.660

2.347

2.099

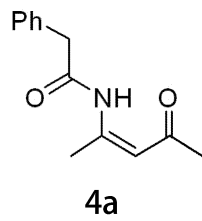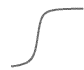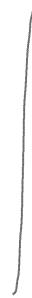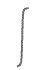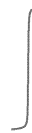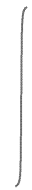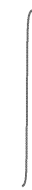

0.99

4.90

1.00

2.08

3.07

3.03

13.5 12.5 11.5 10.5 9.5 9.0 8.5 8.0 7.5 7.0 6.5 6.0 5.5 5.0 4.5 4.0 3.5 3.0 2.5 2.0 1.5 1.0 0.5 0.0

f1 (ppm)

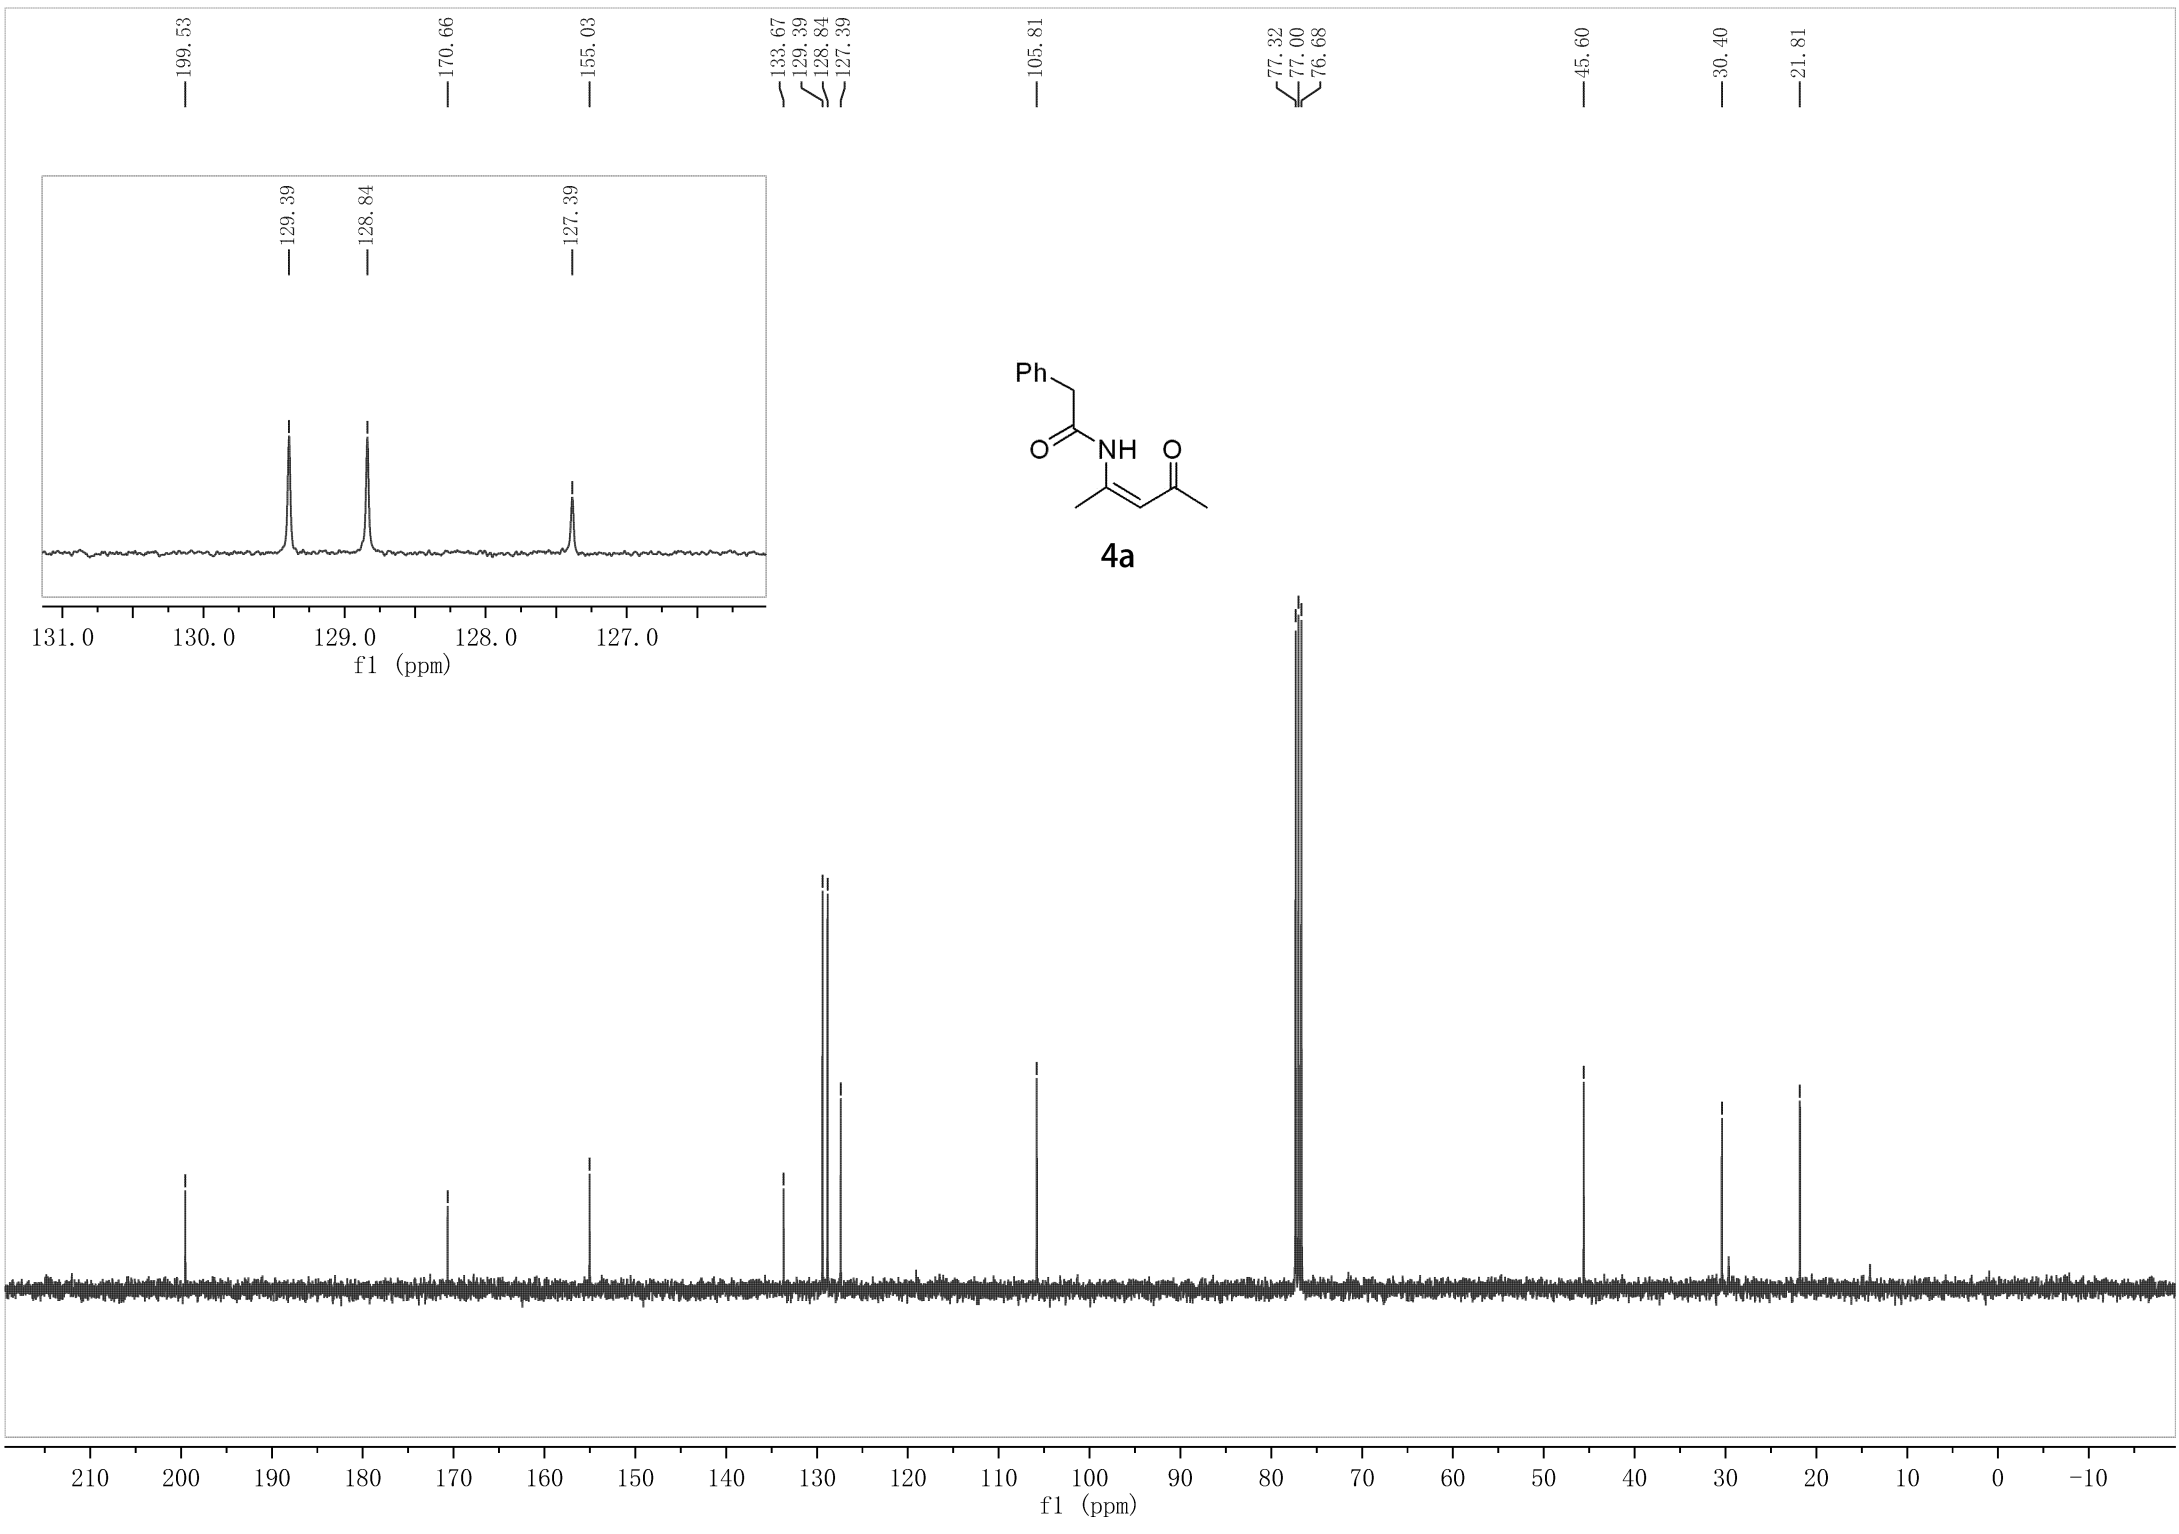

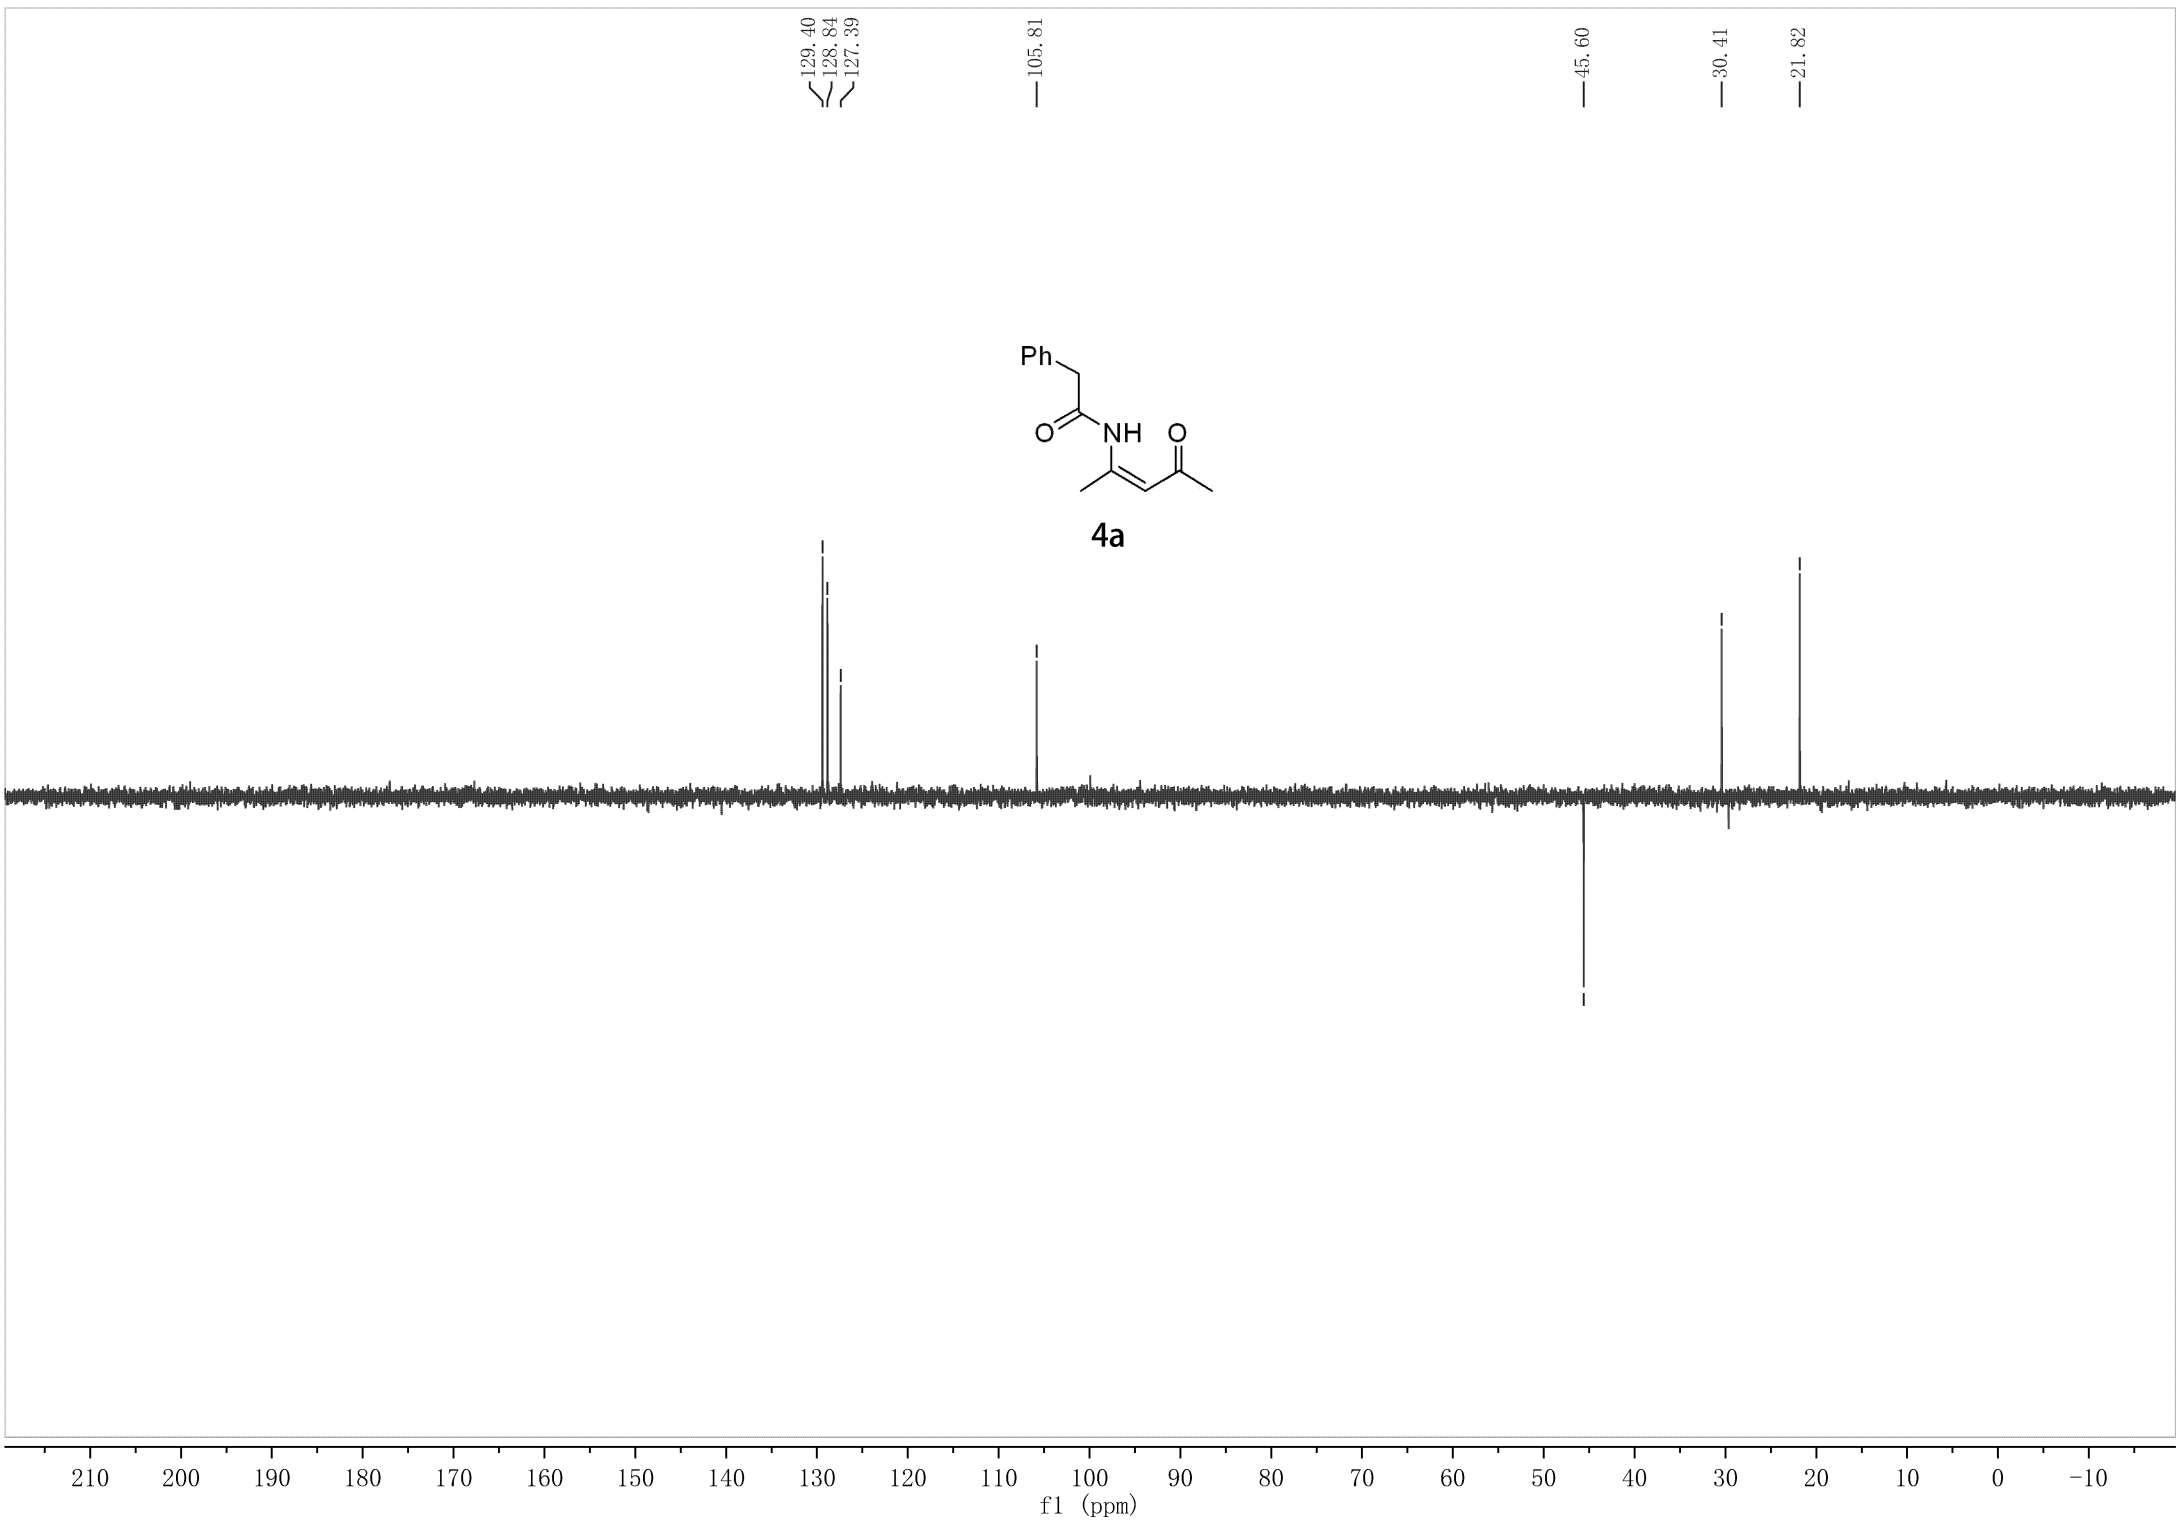

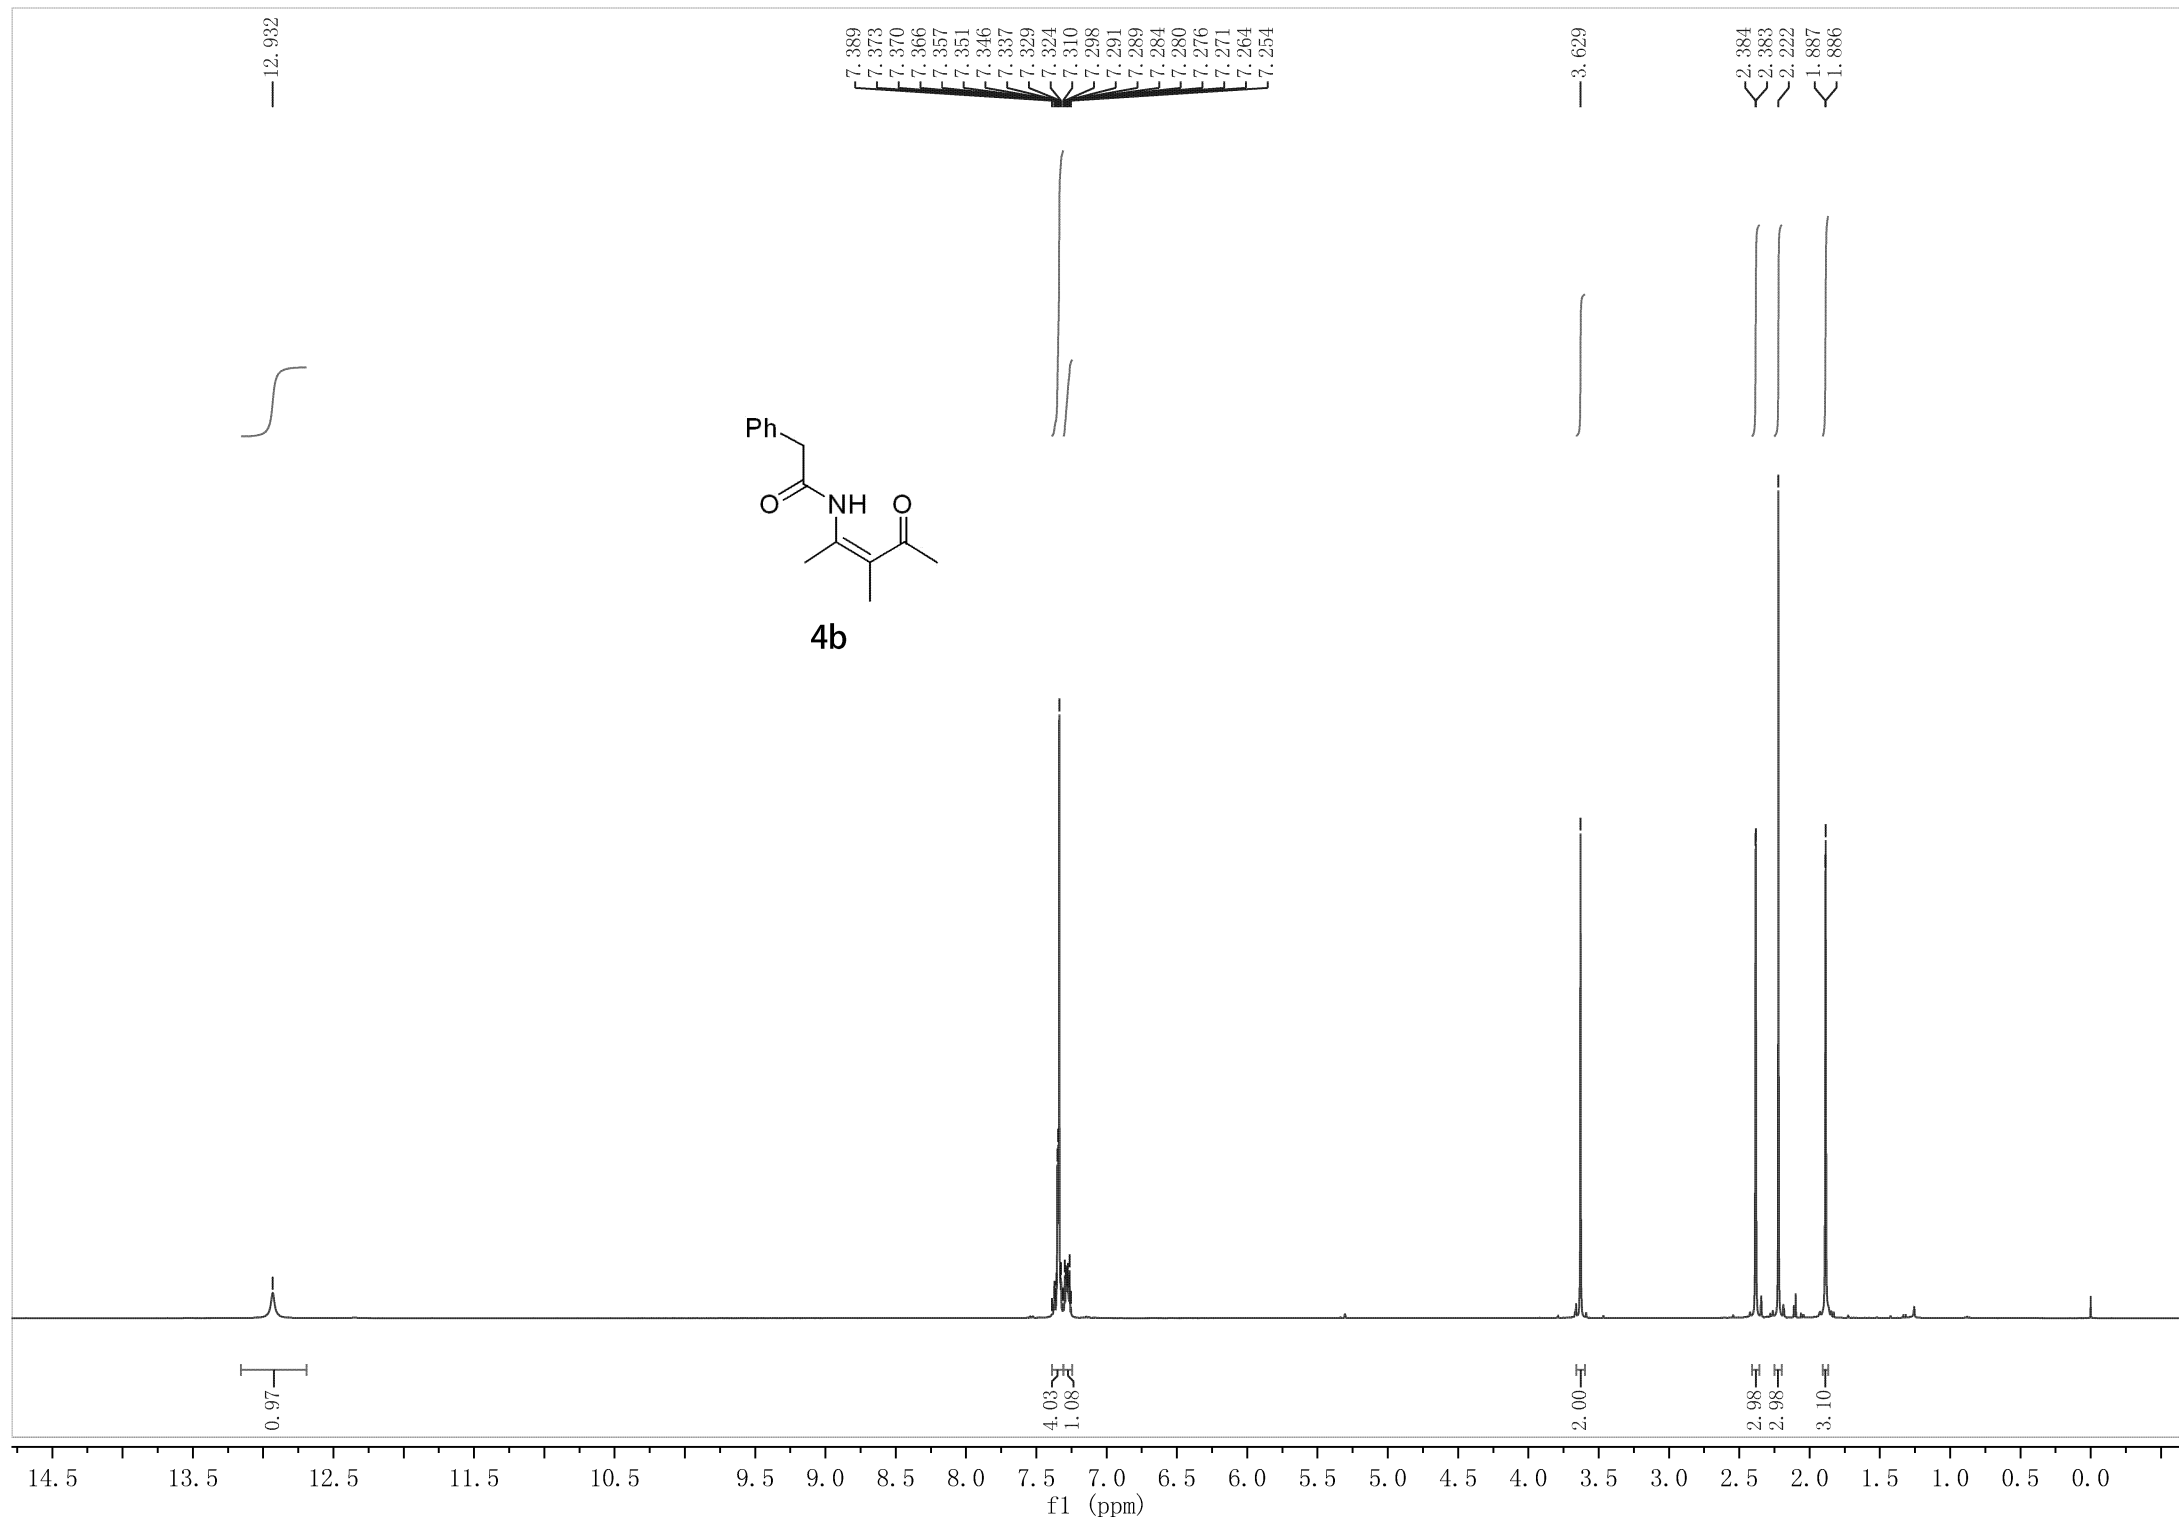

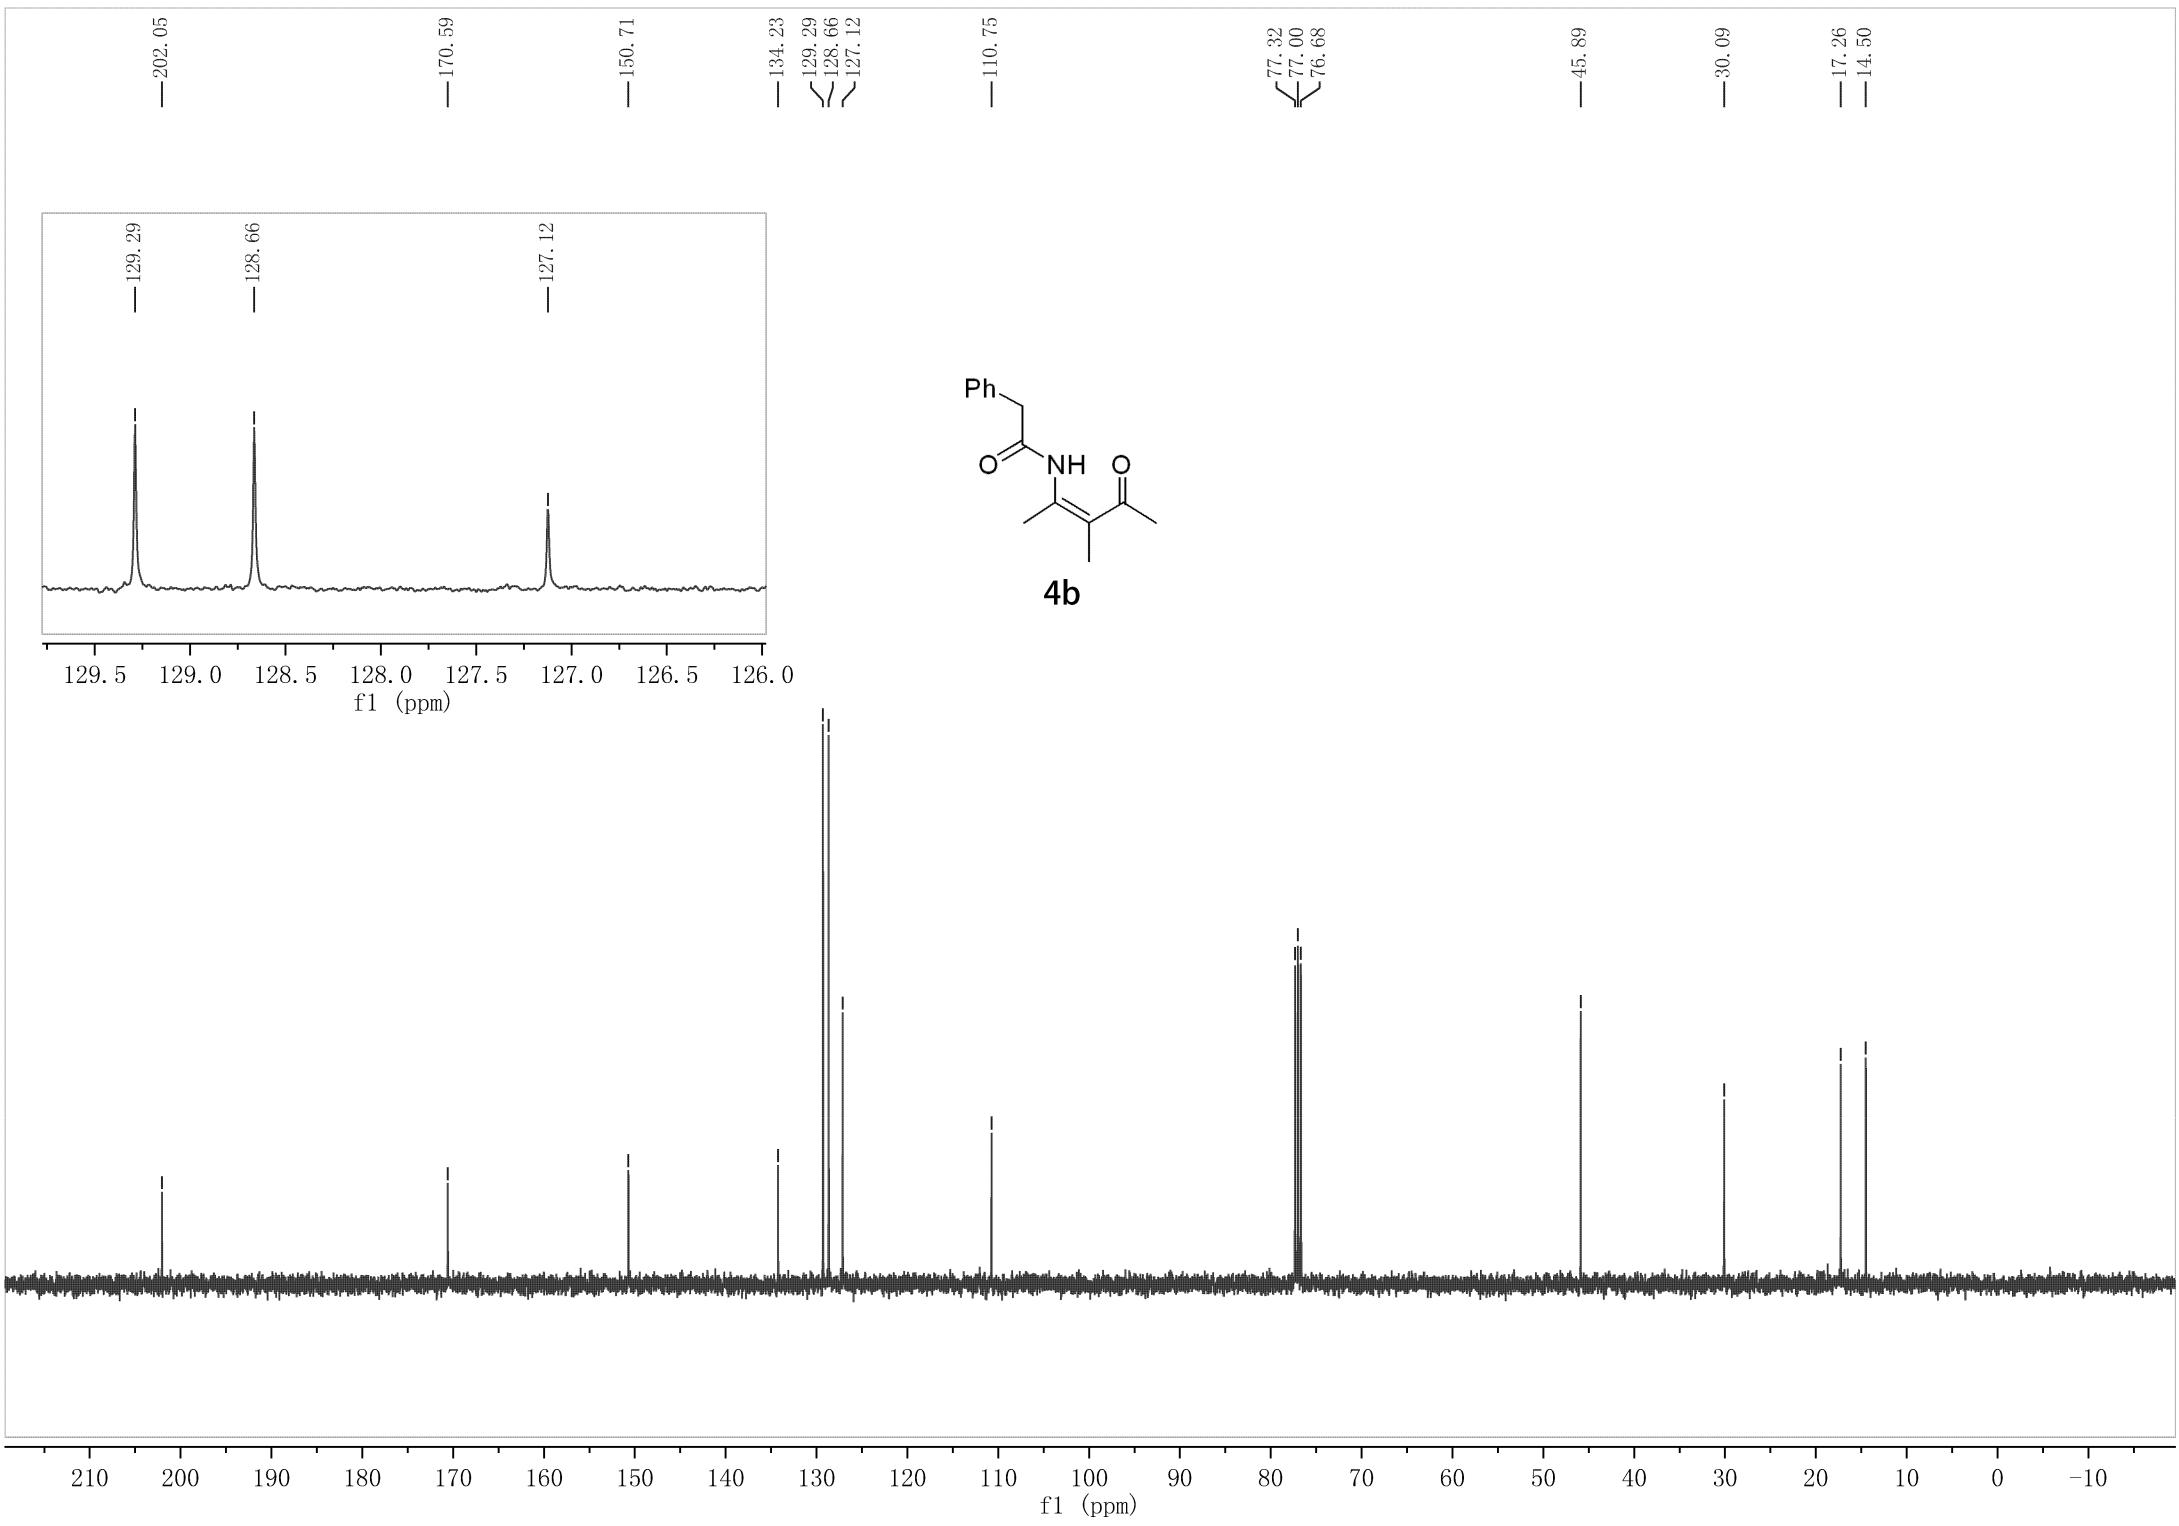



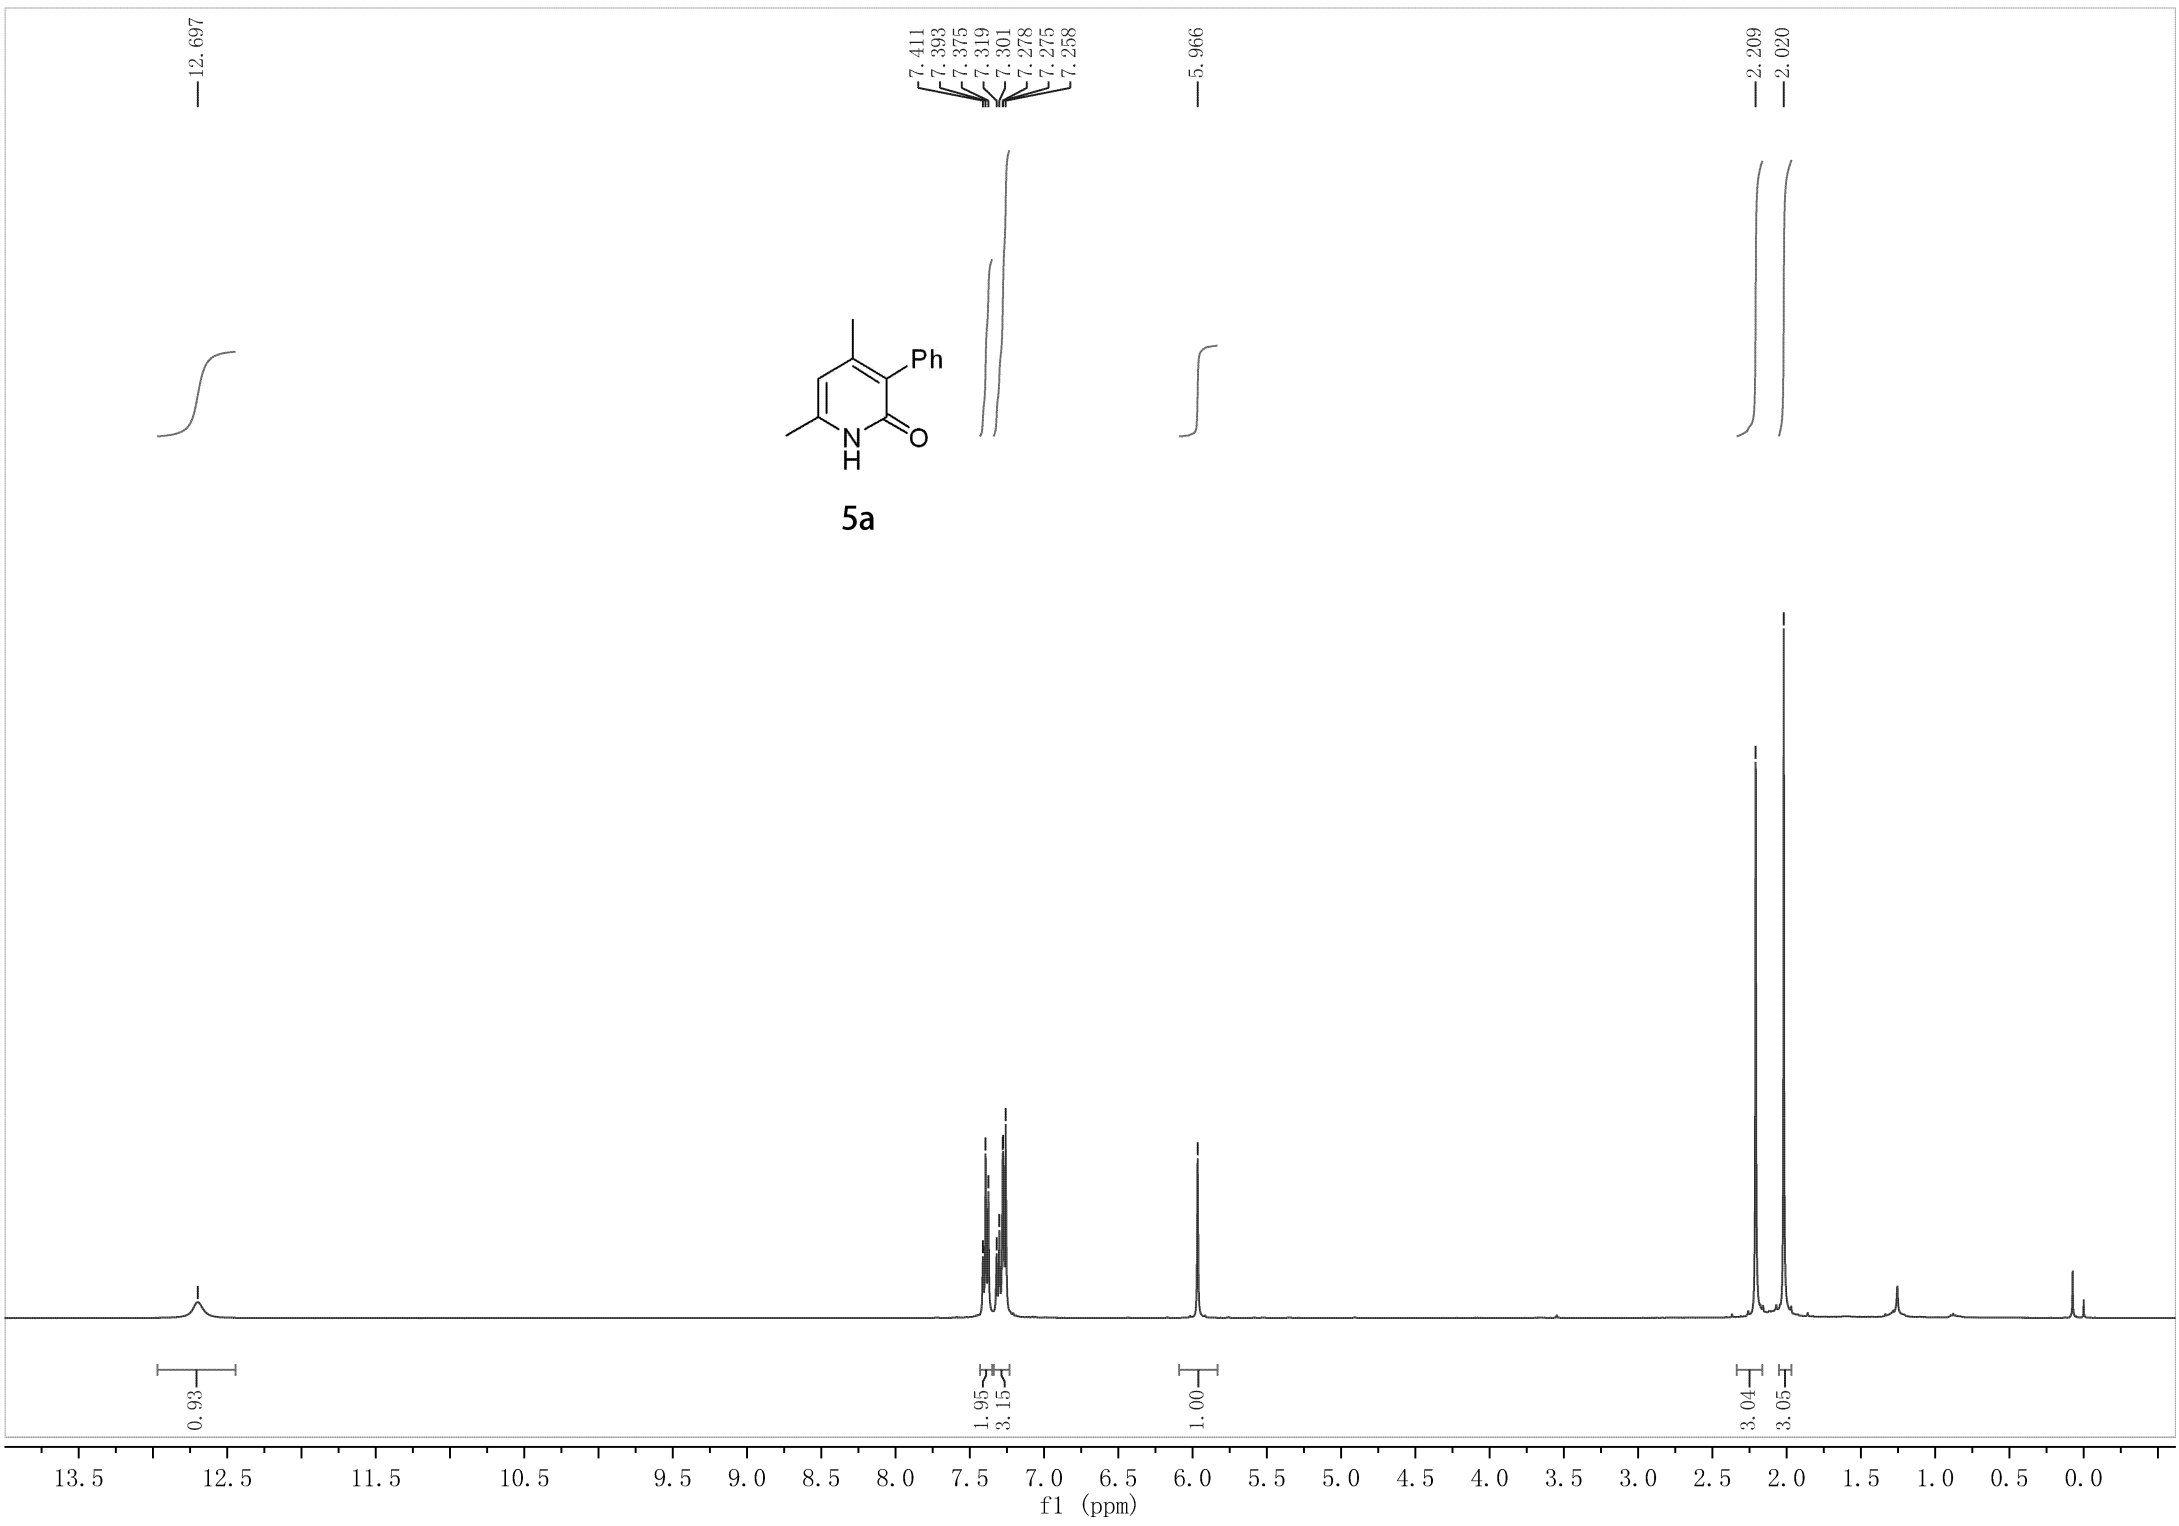

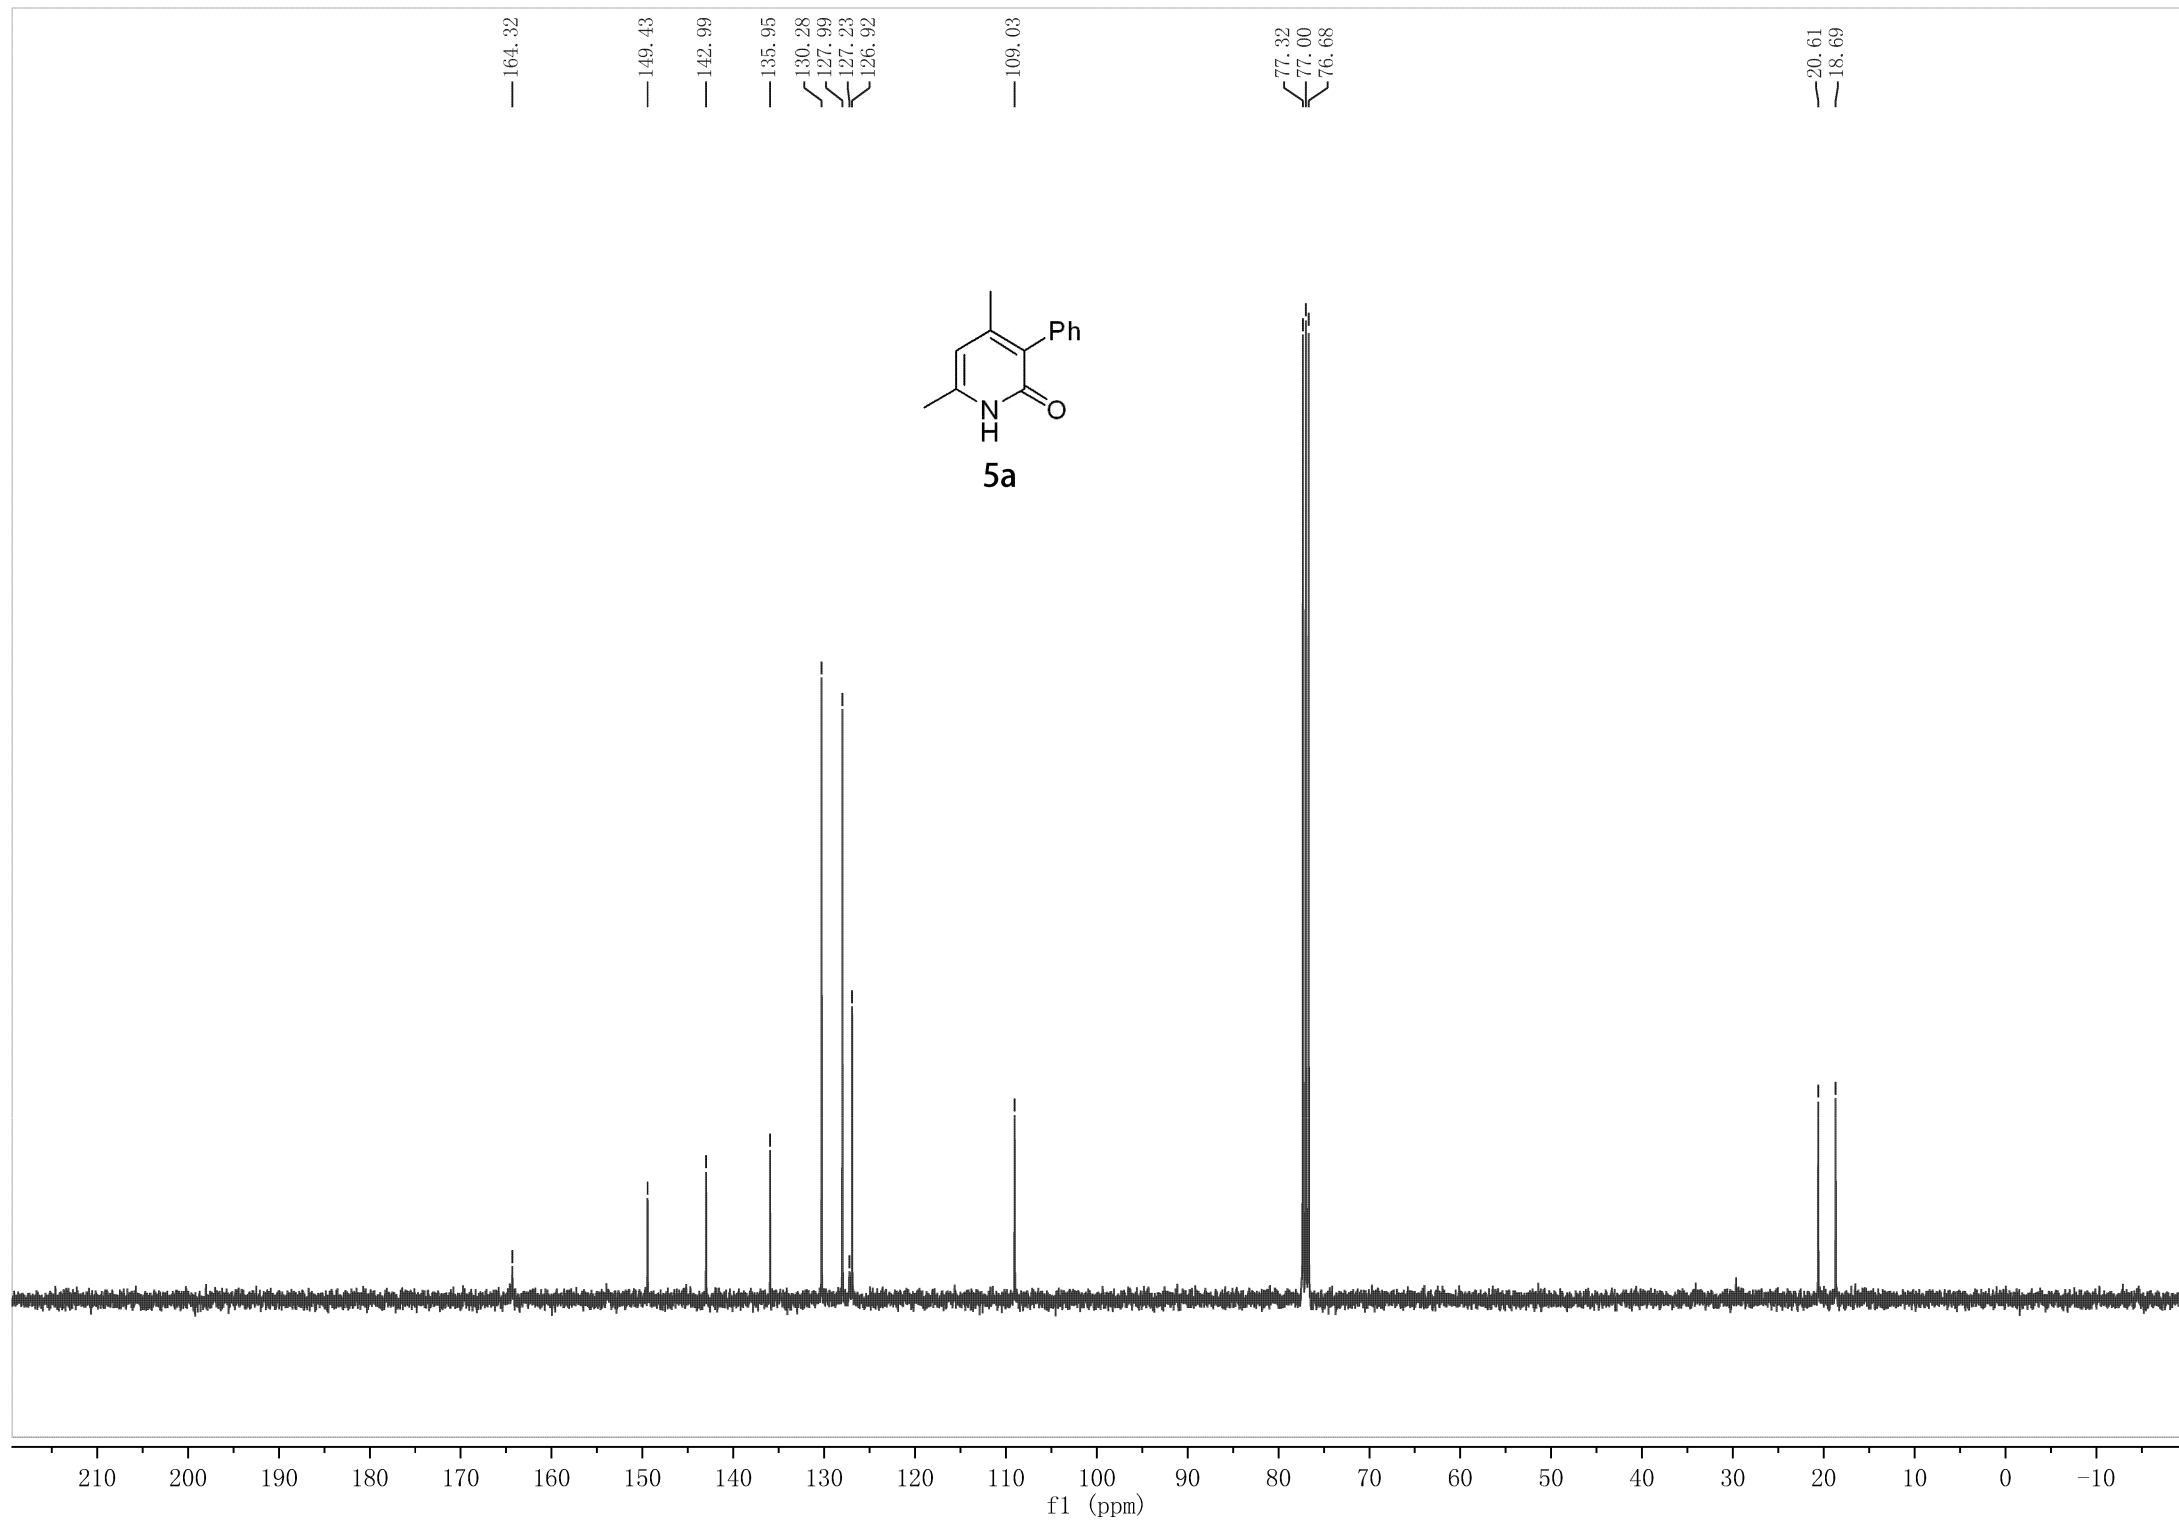

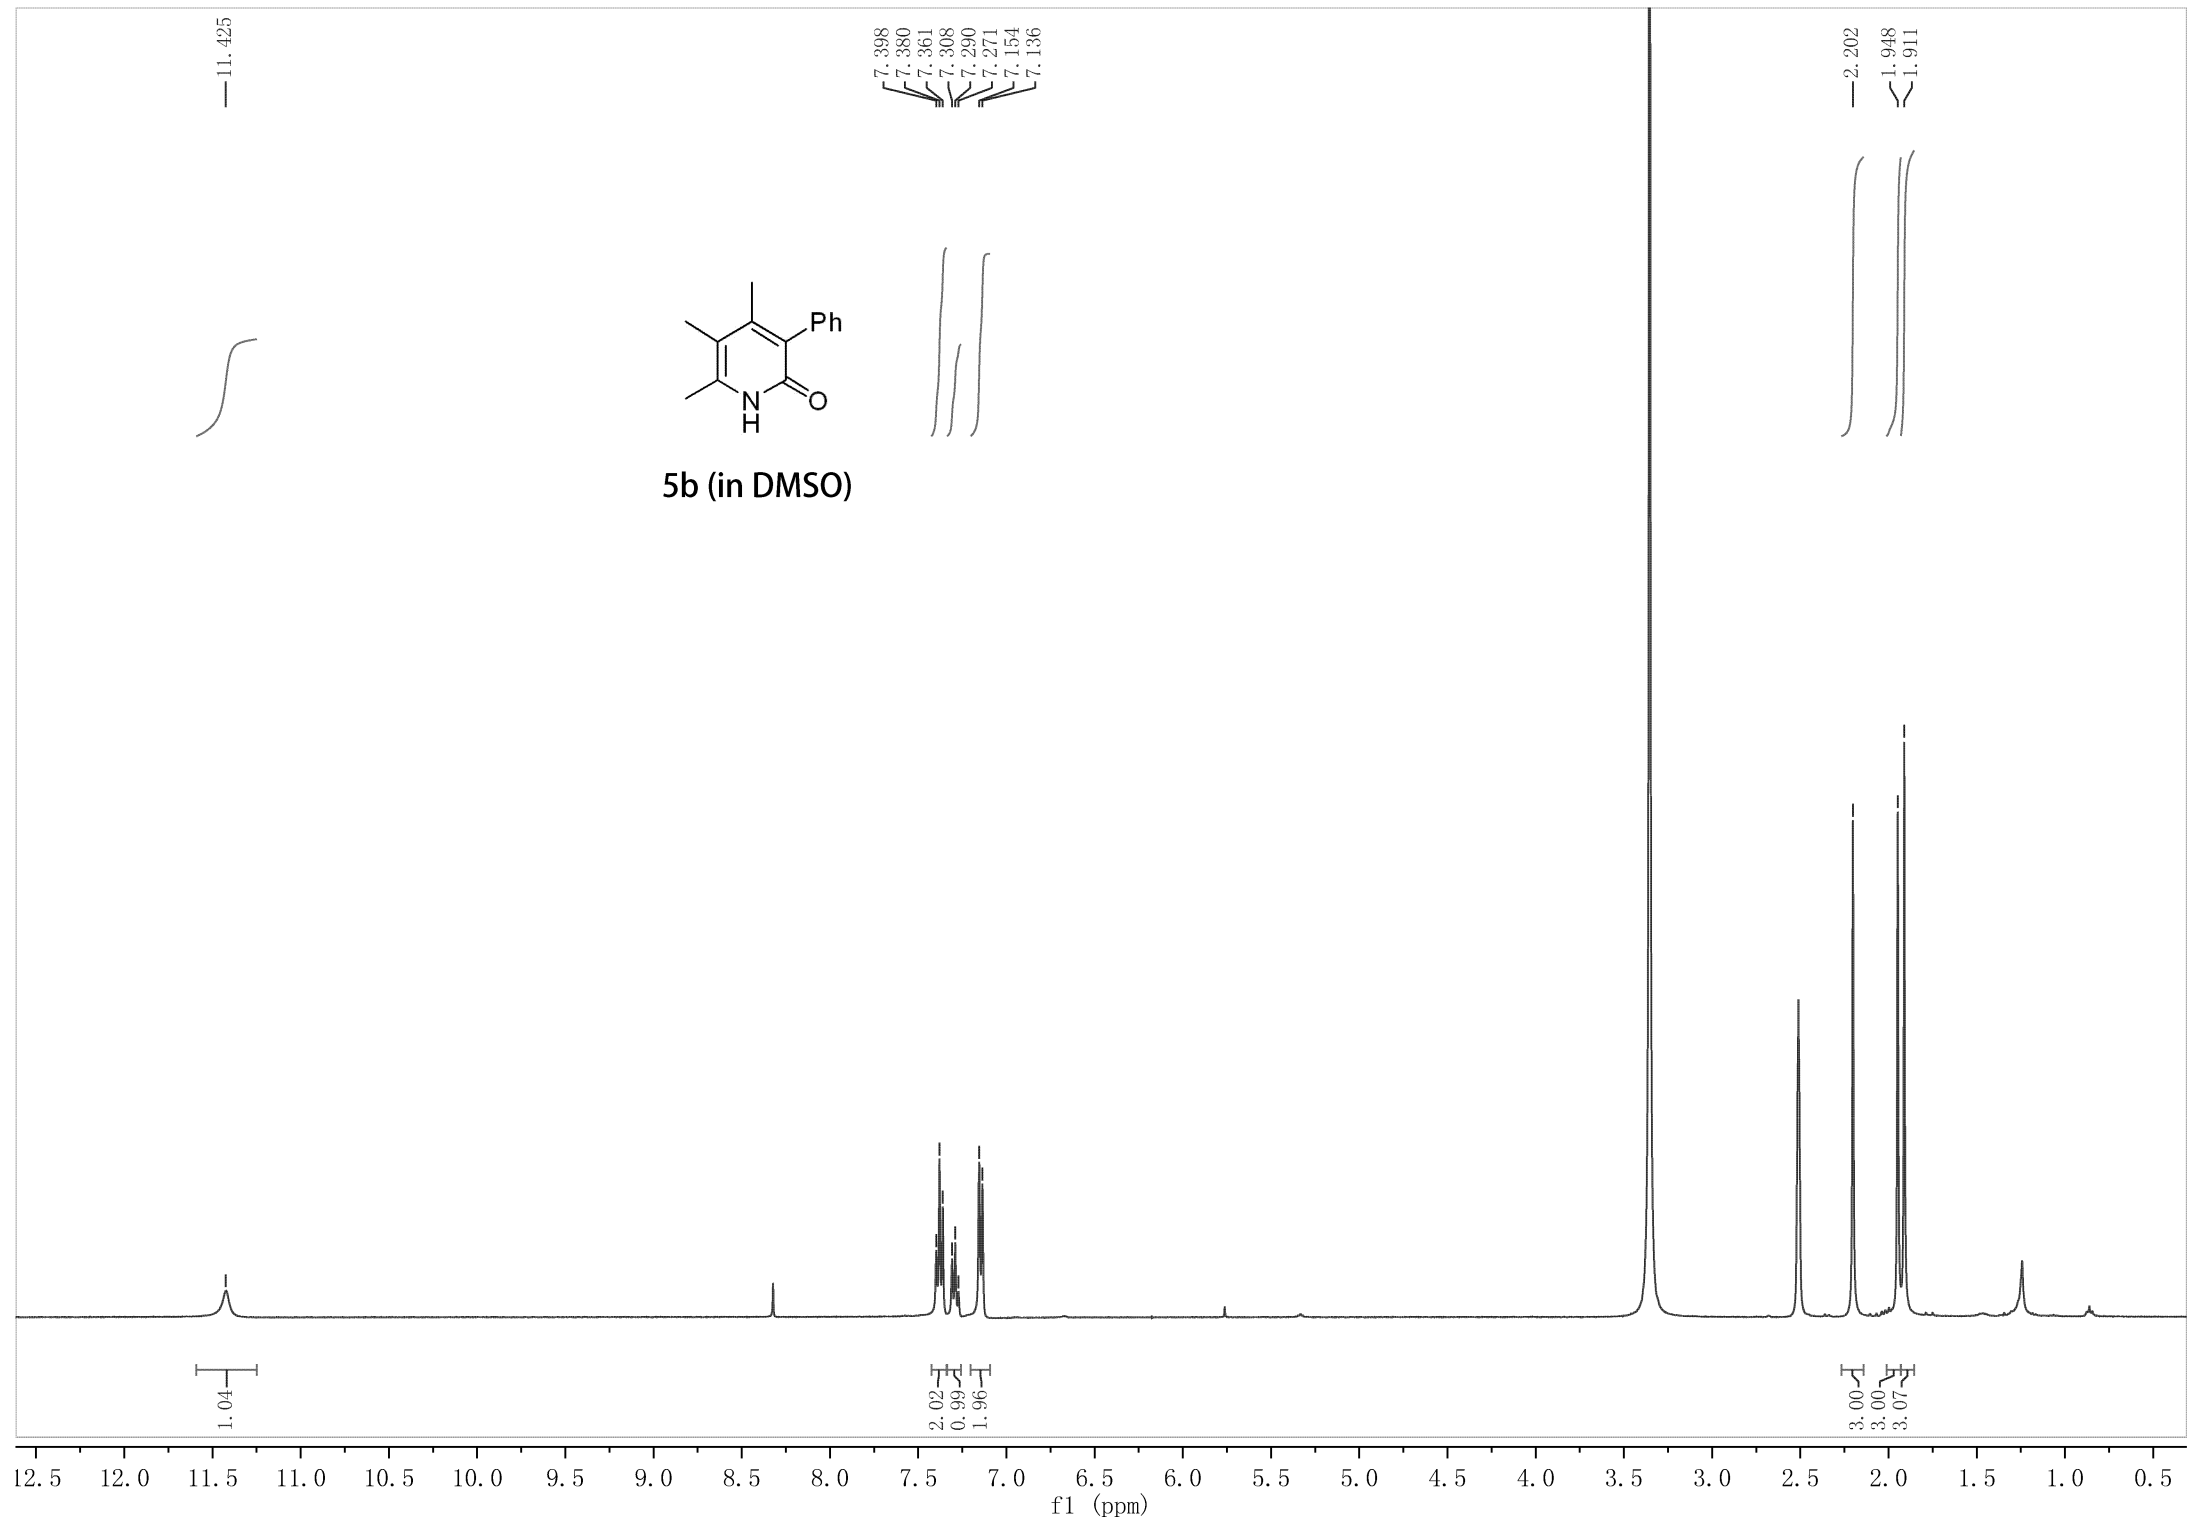

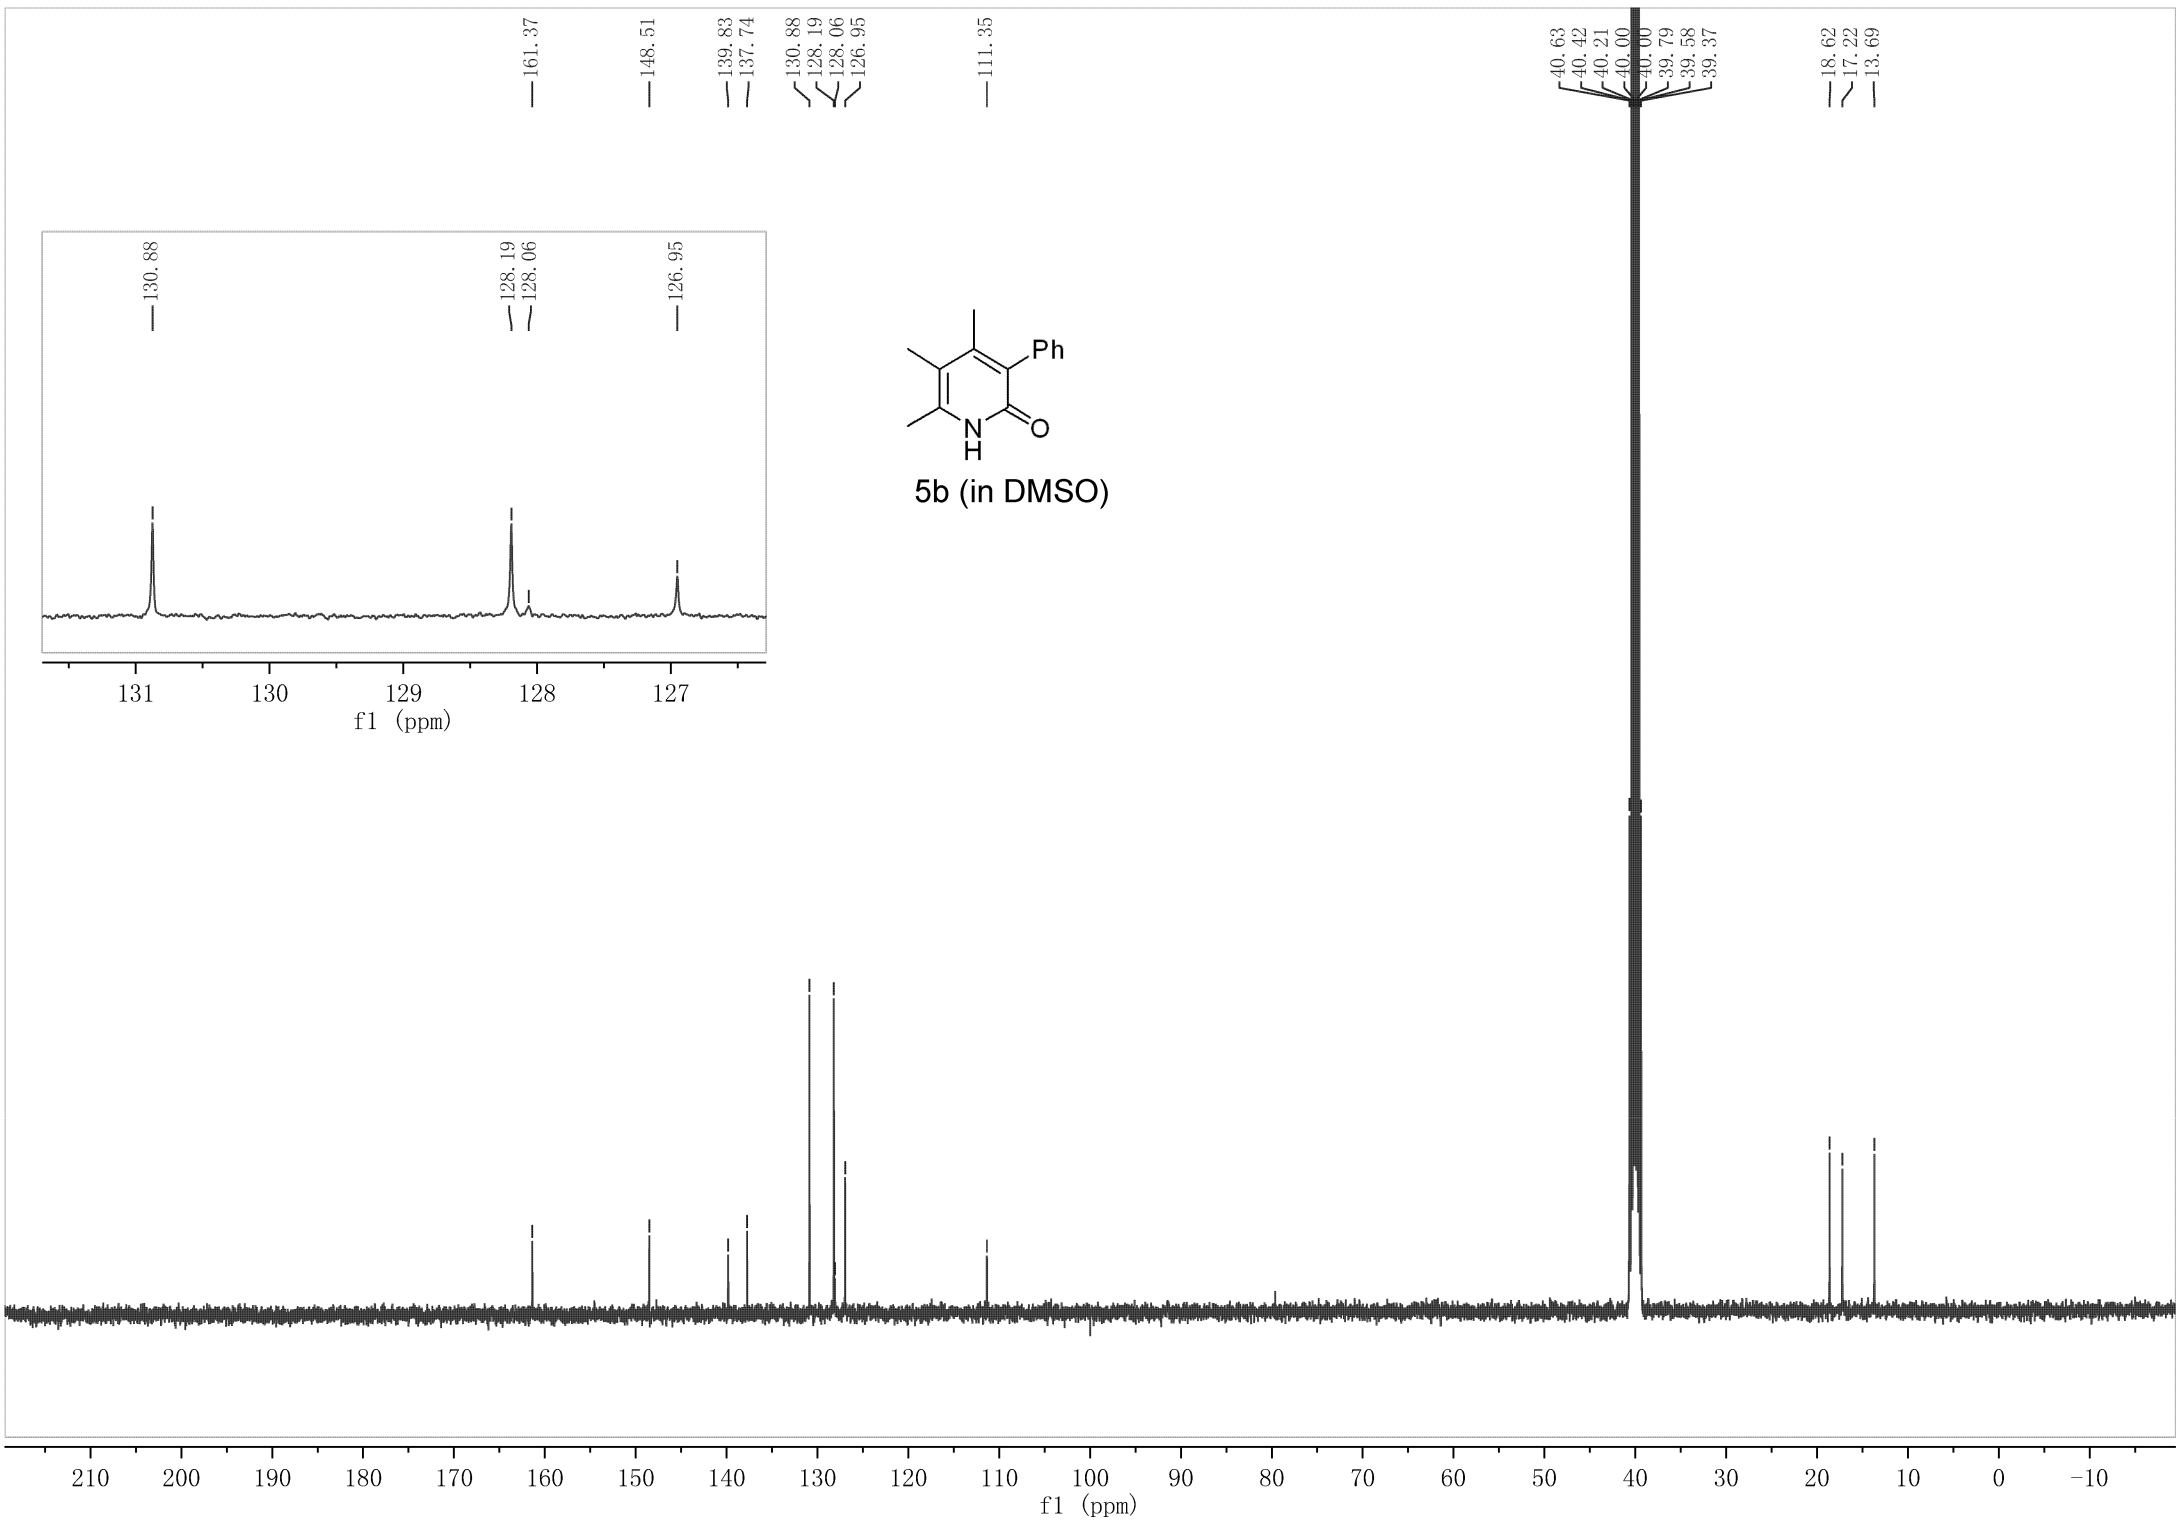

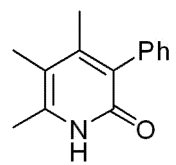

5b (in DMSO)

130.87  
128.19  
126.95

18.63  
17.21  
13.69

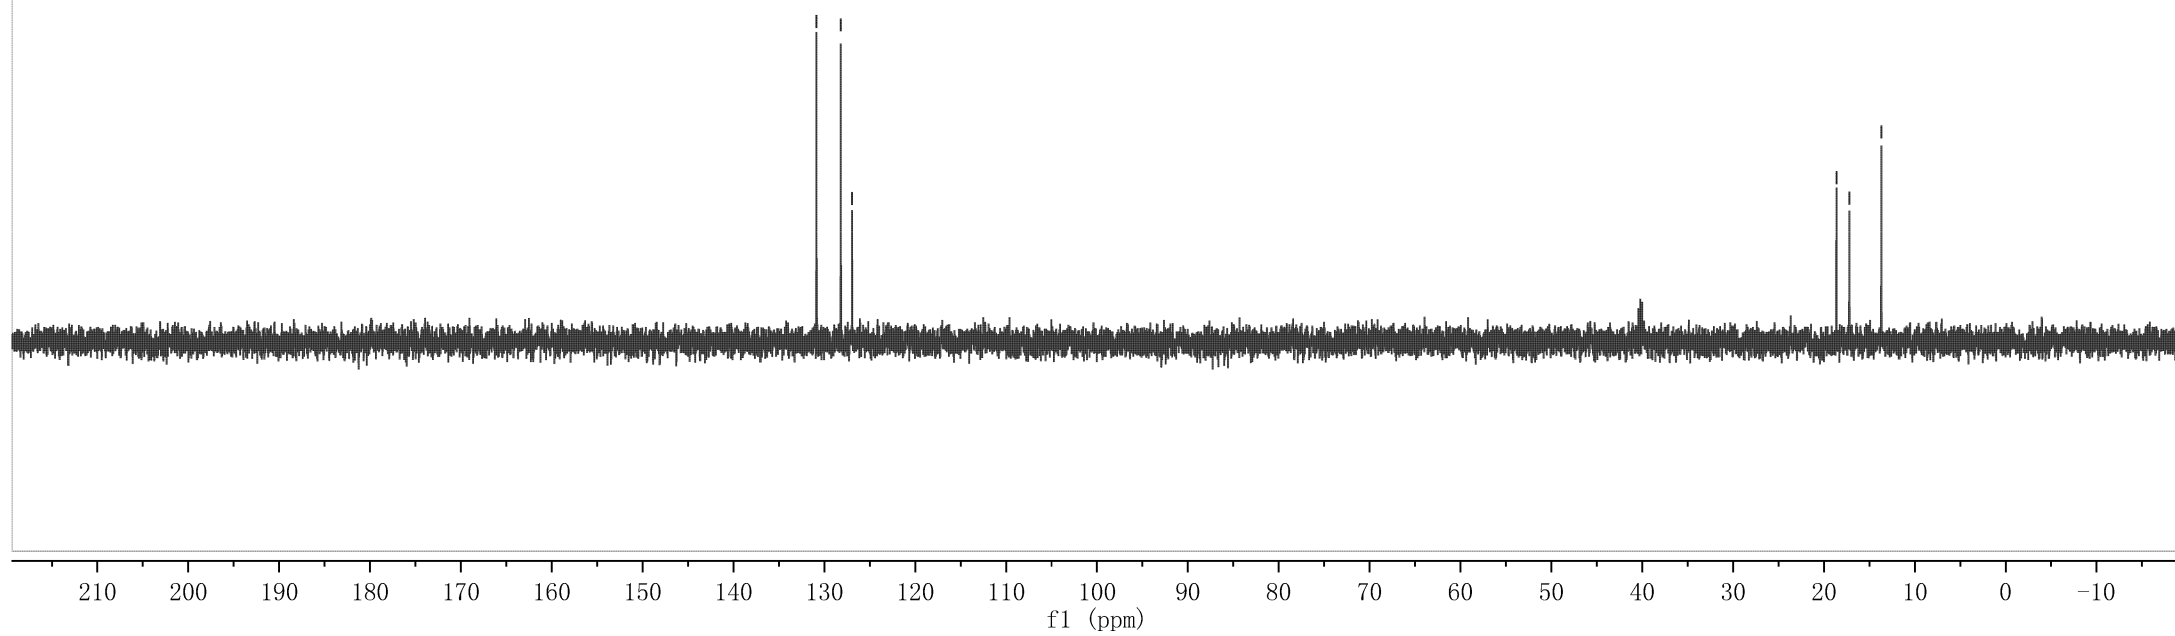

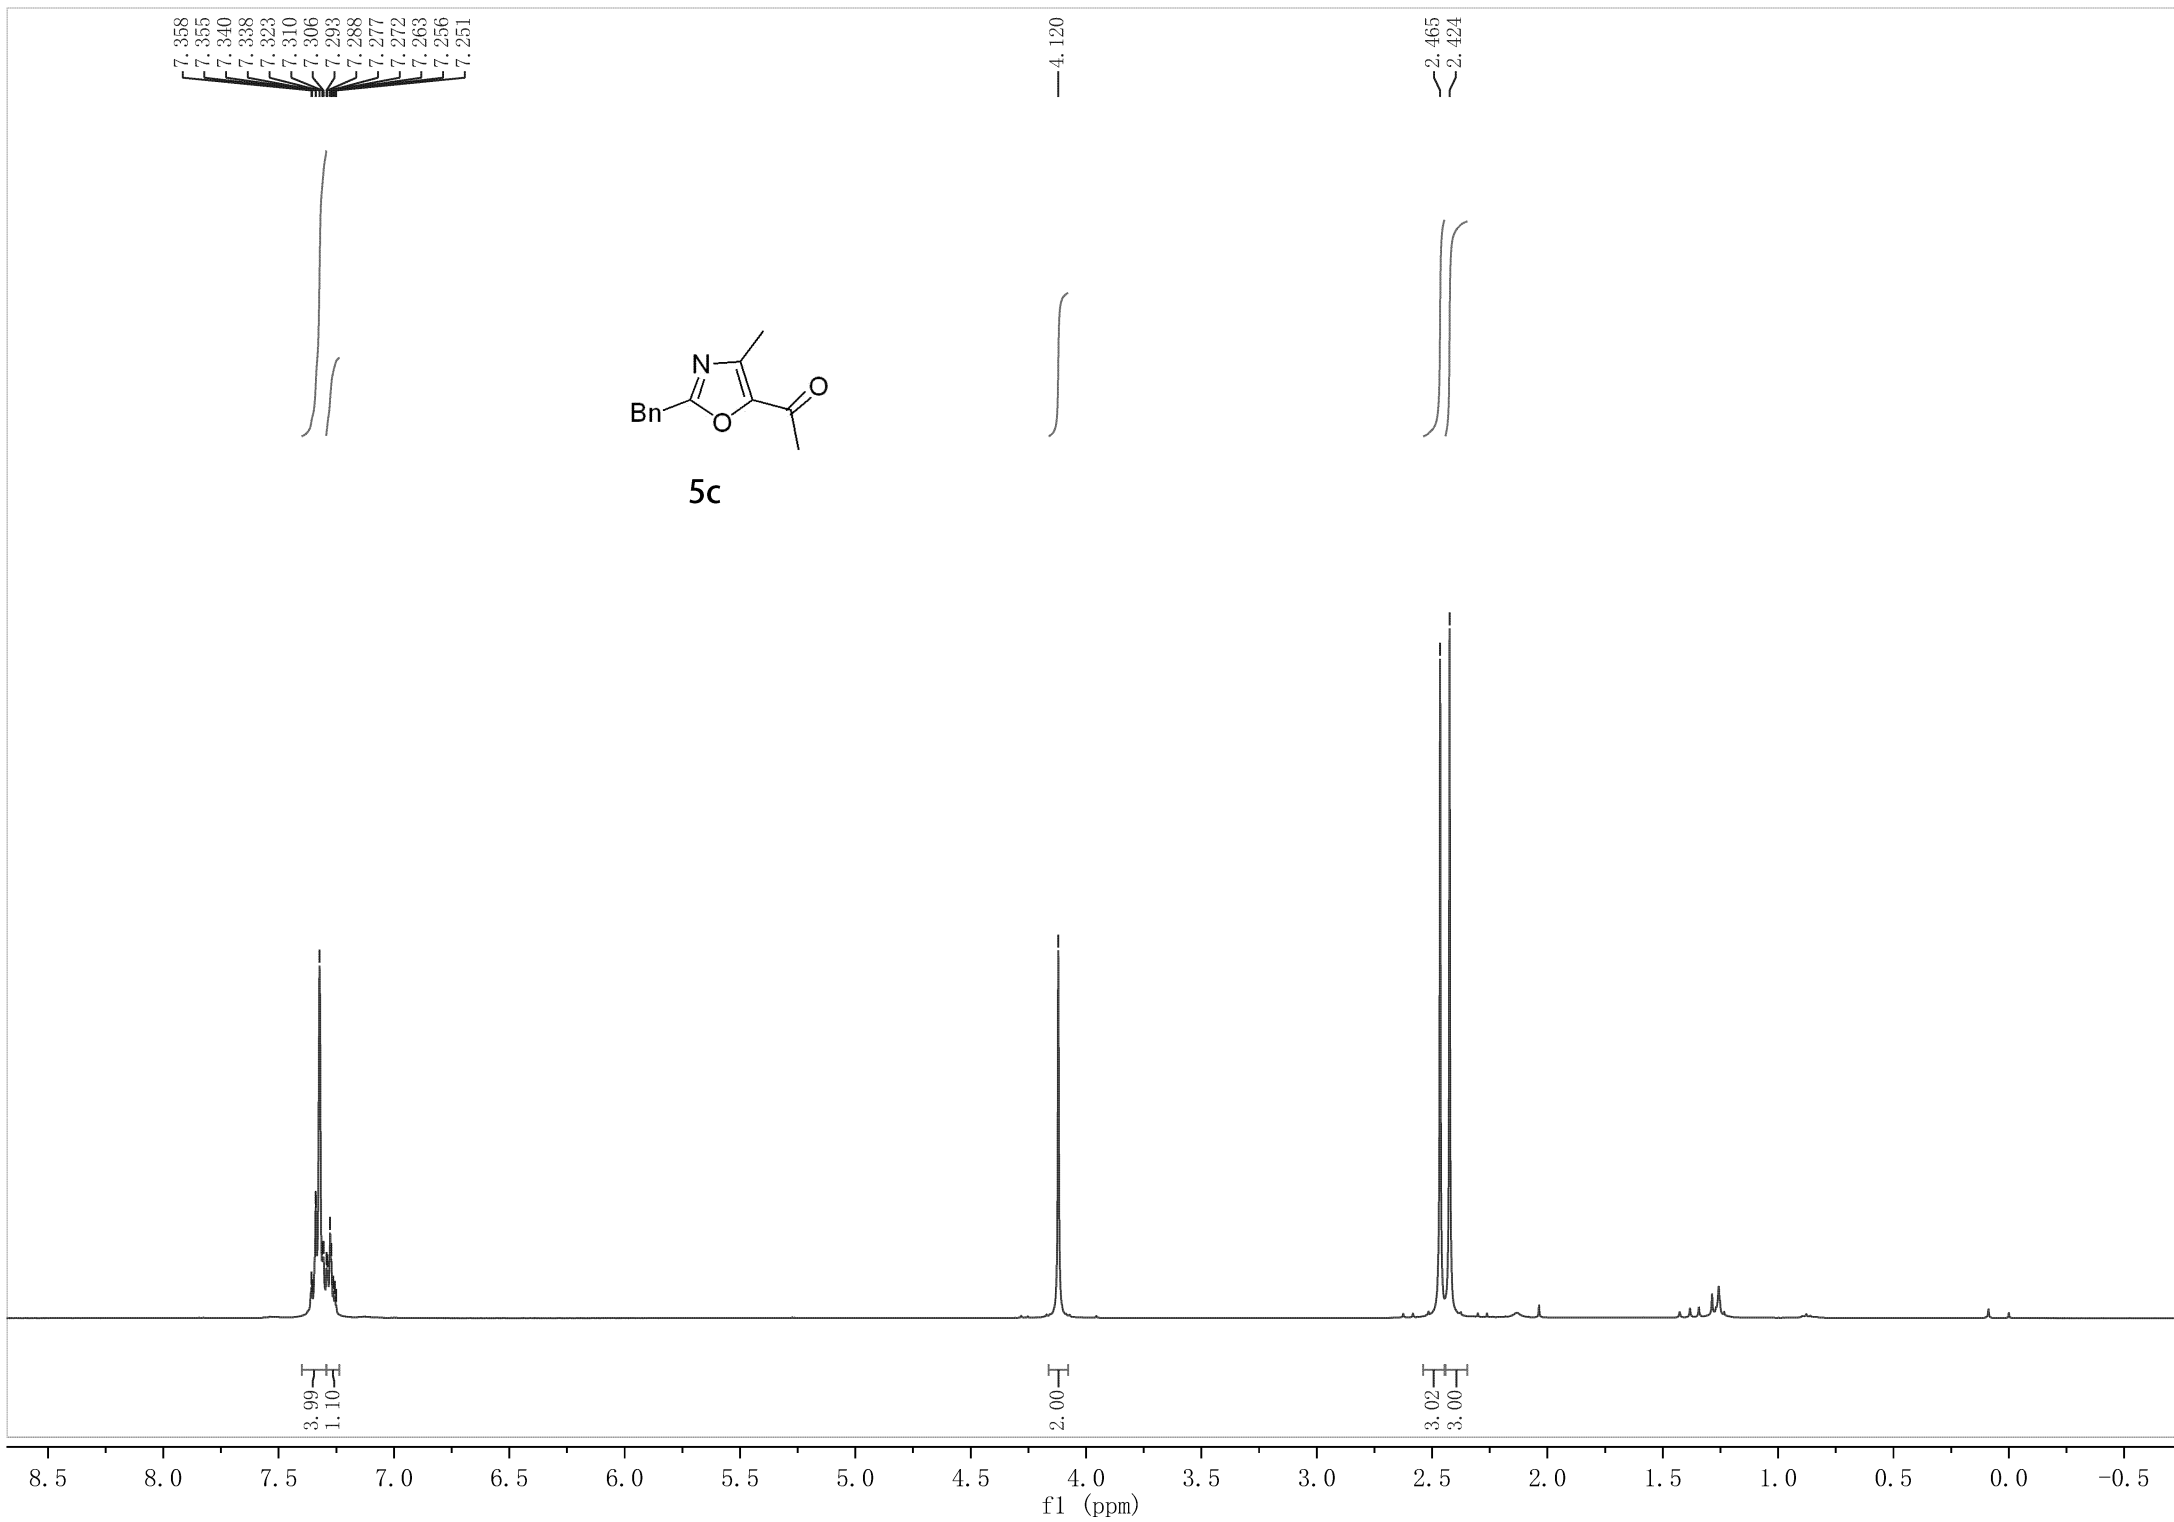

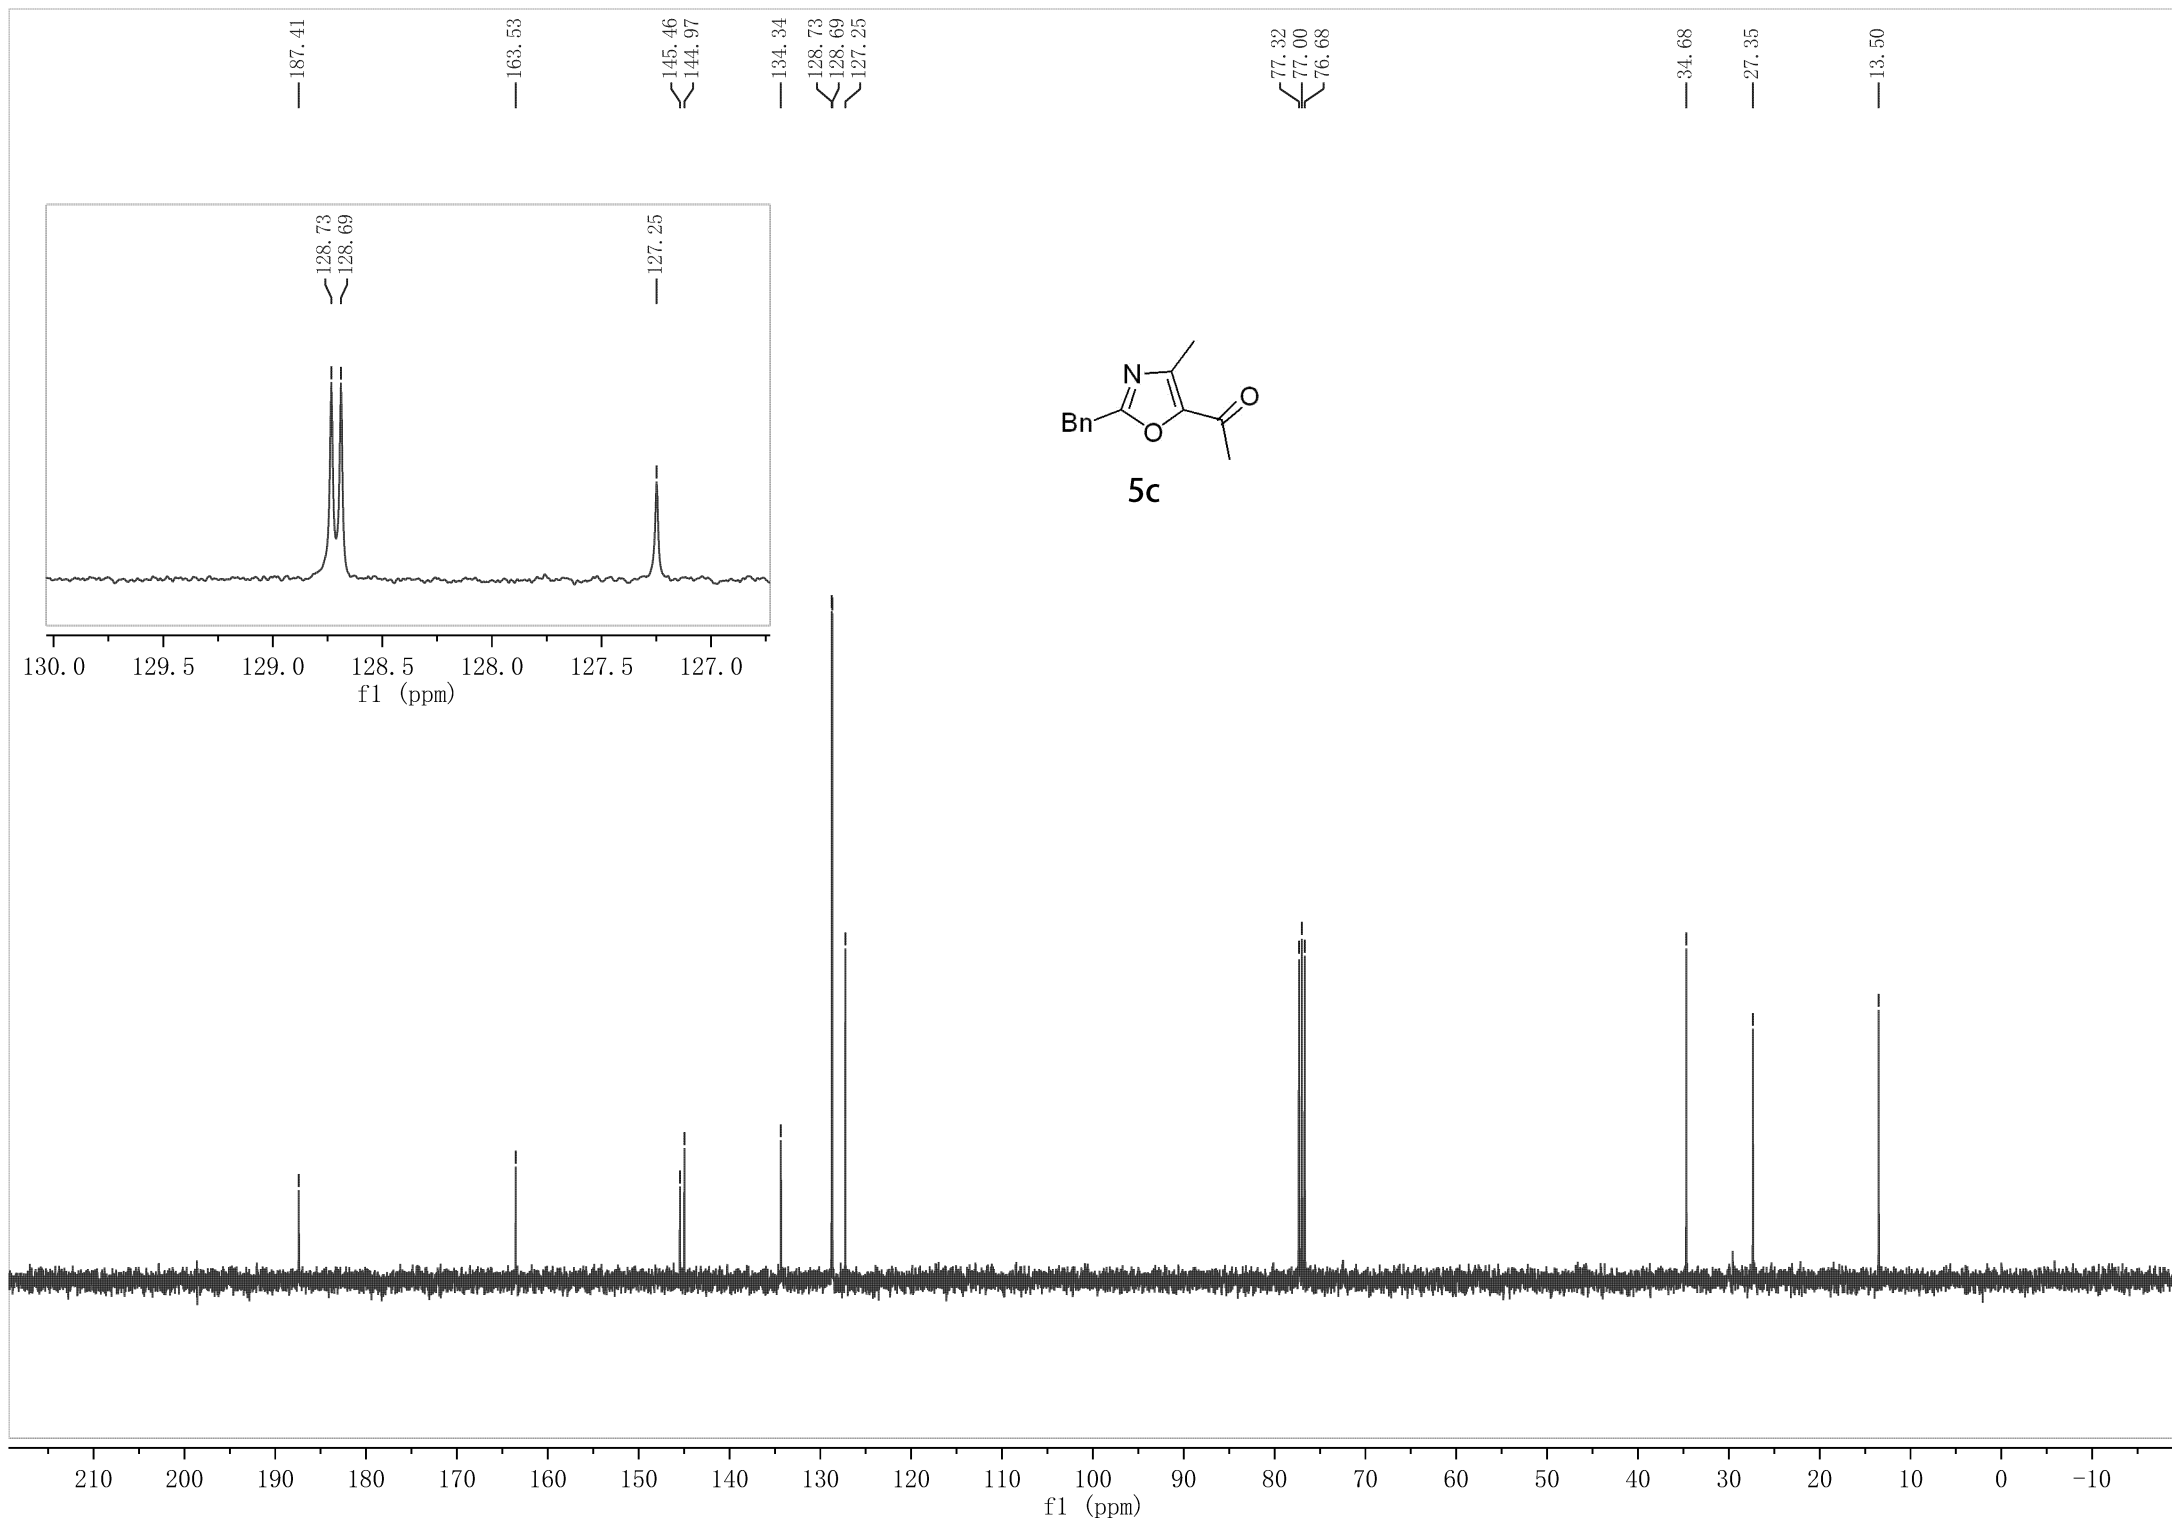

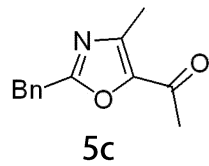

128.73  
128.69  
127.25

34.68

27.34

13.50

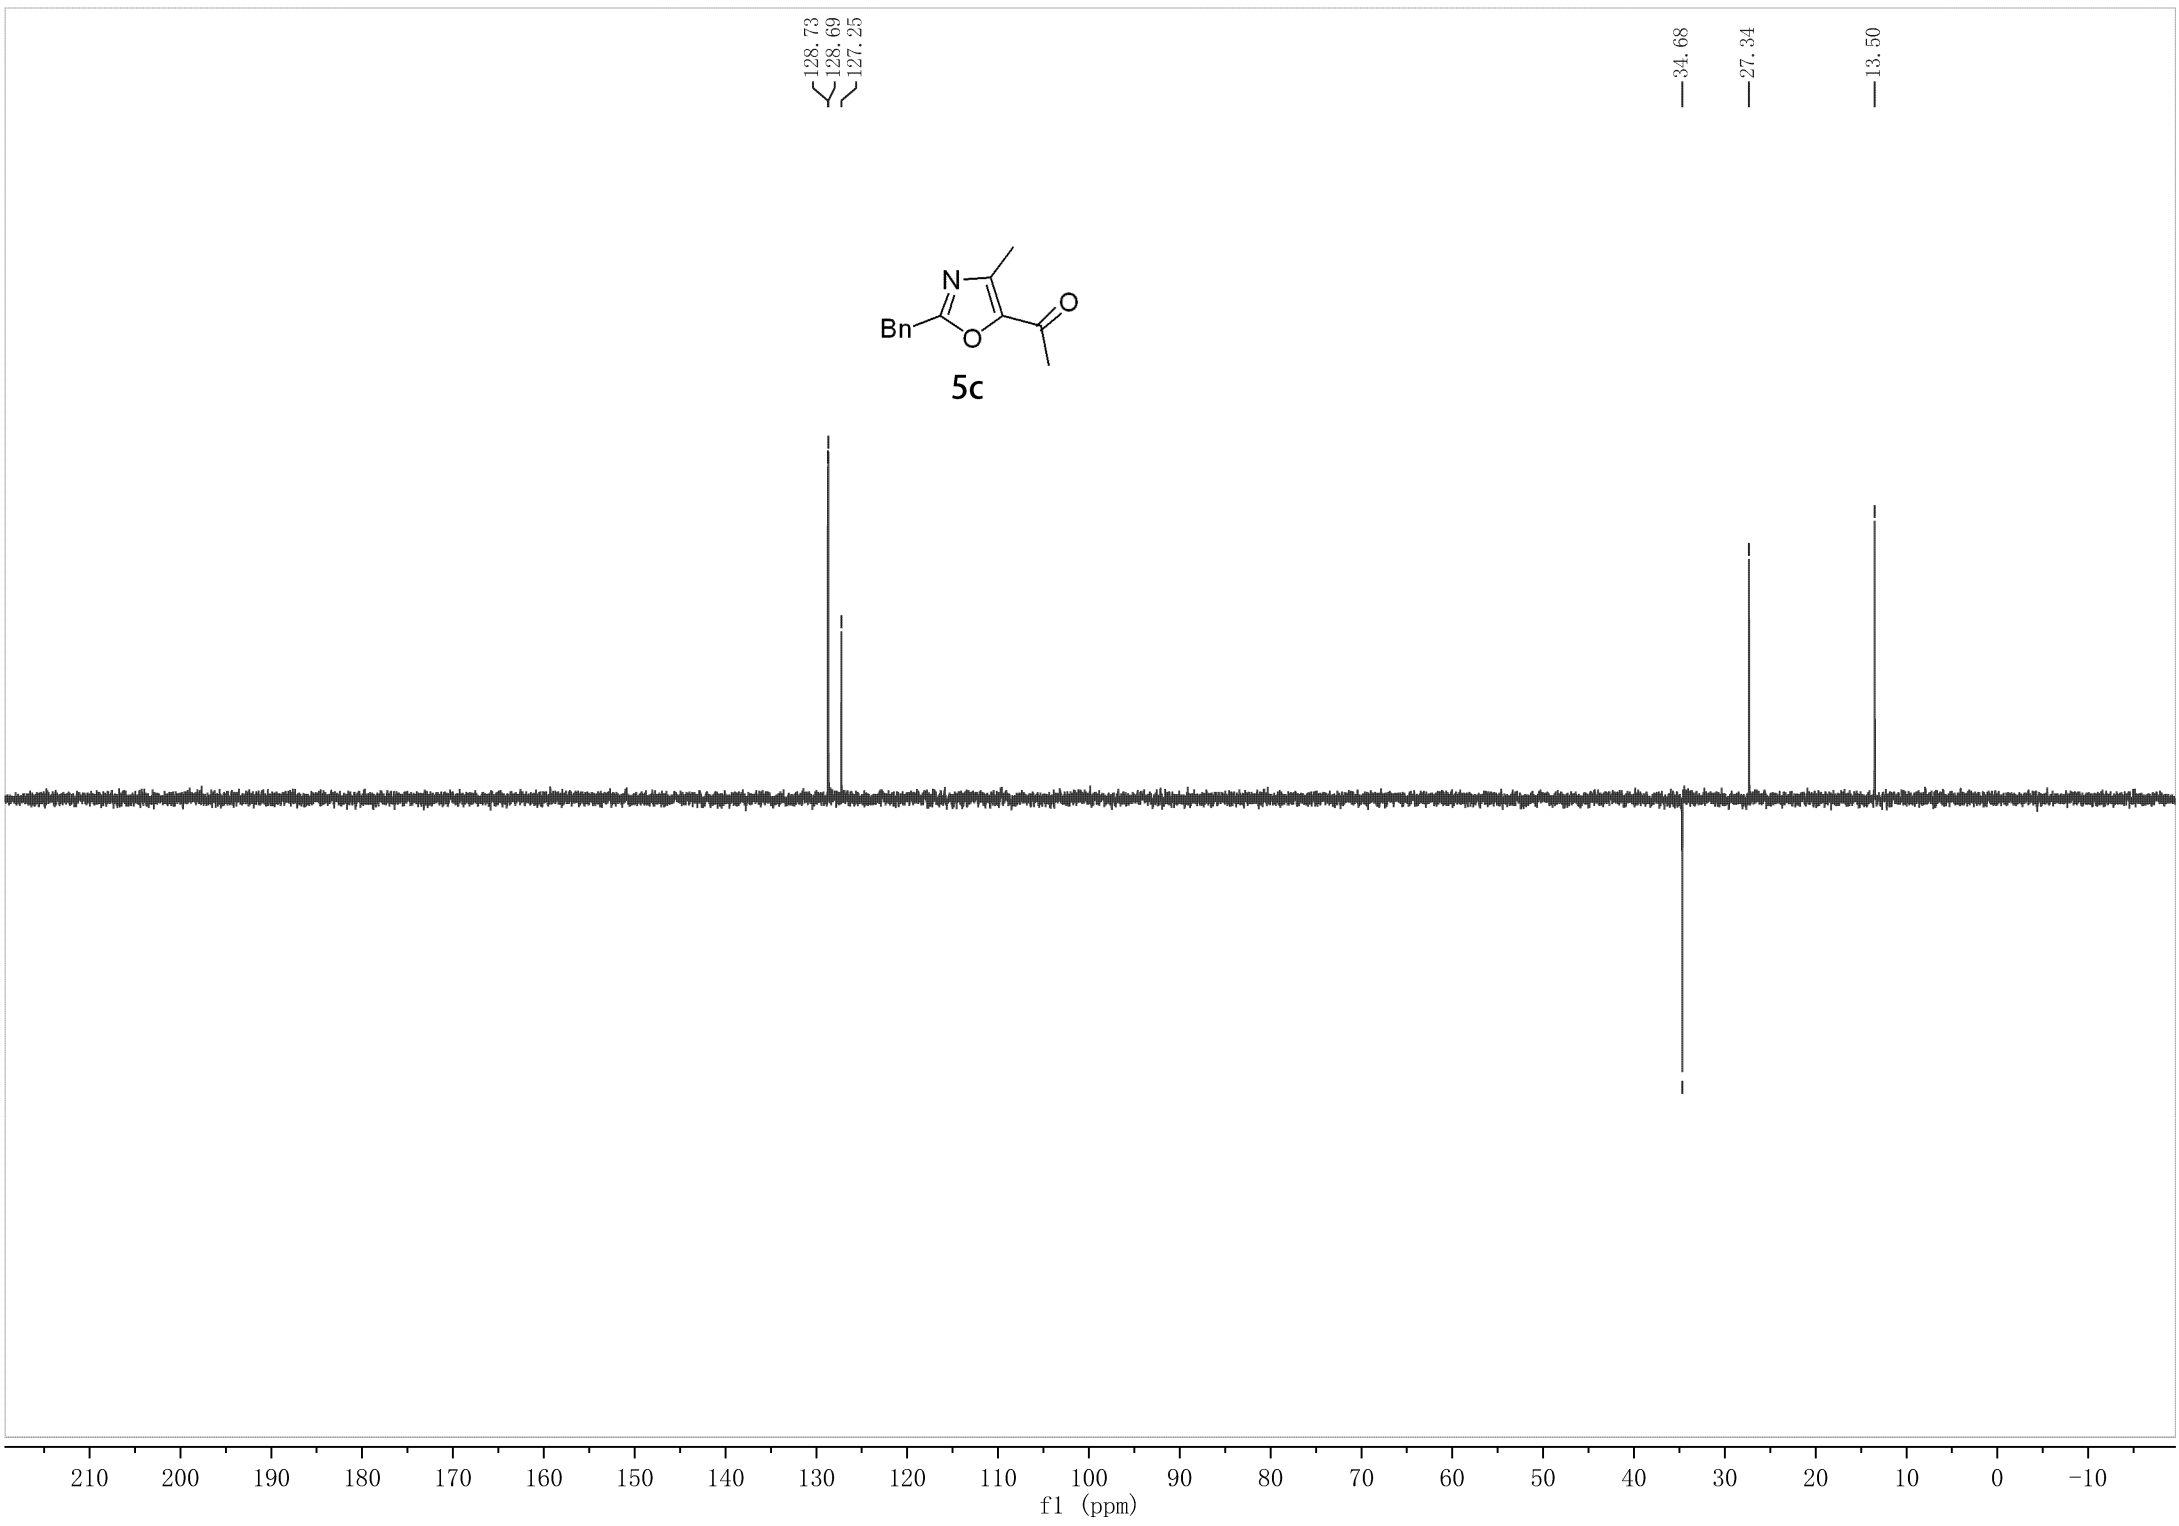



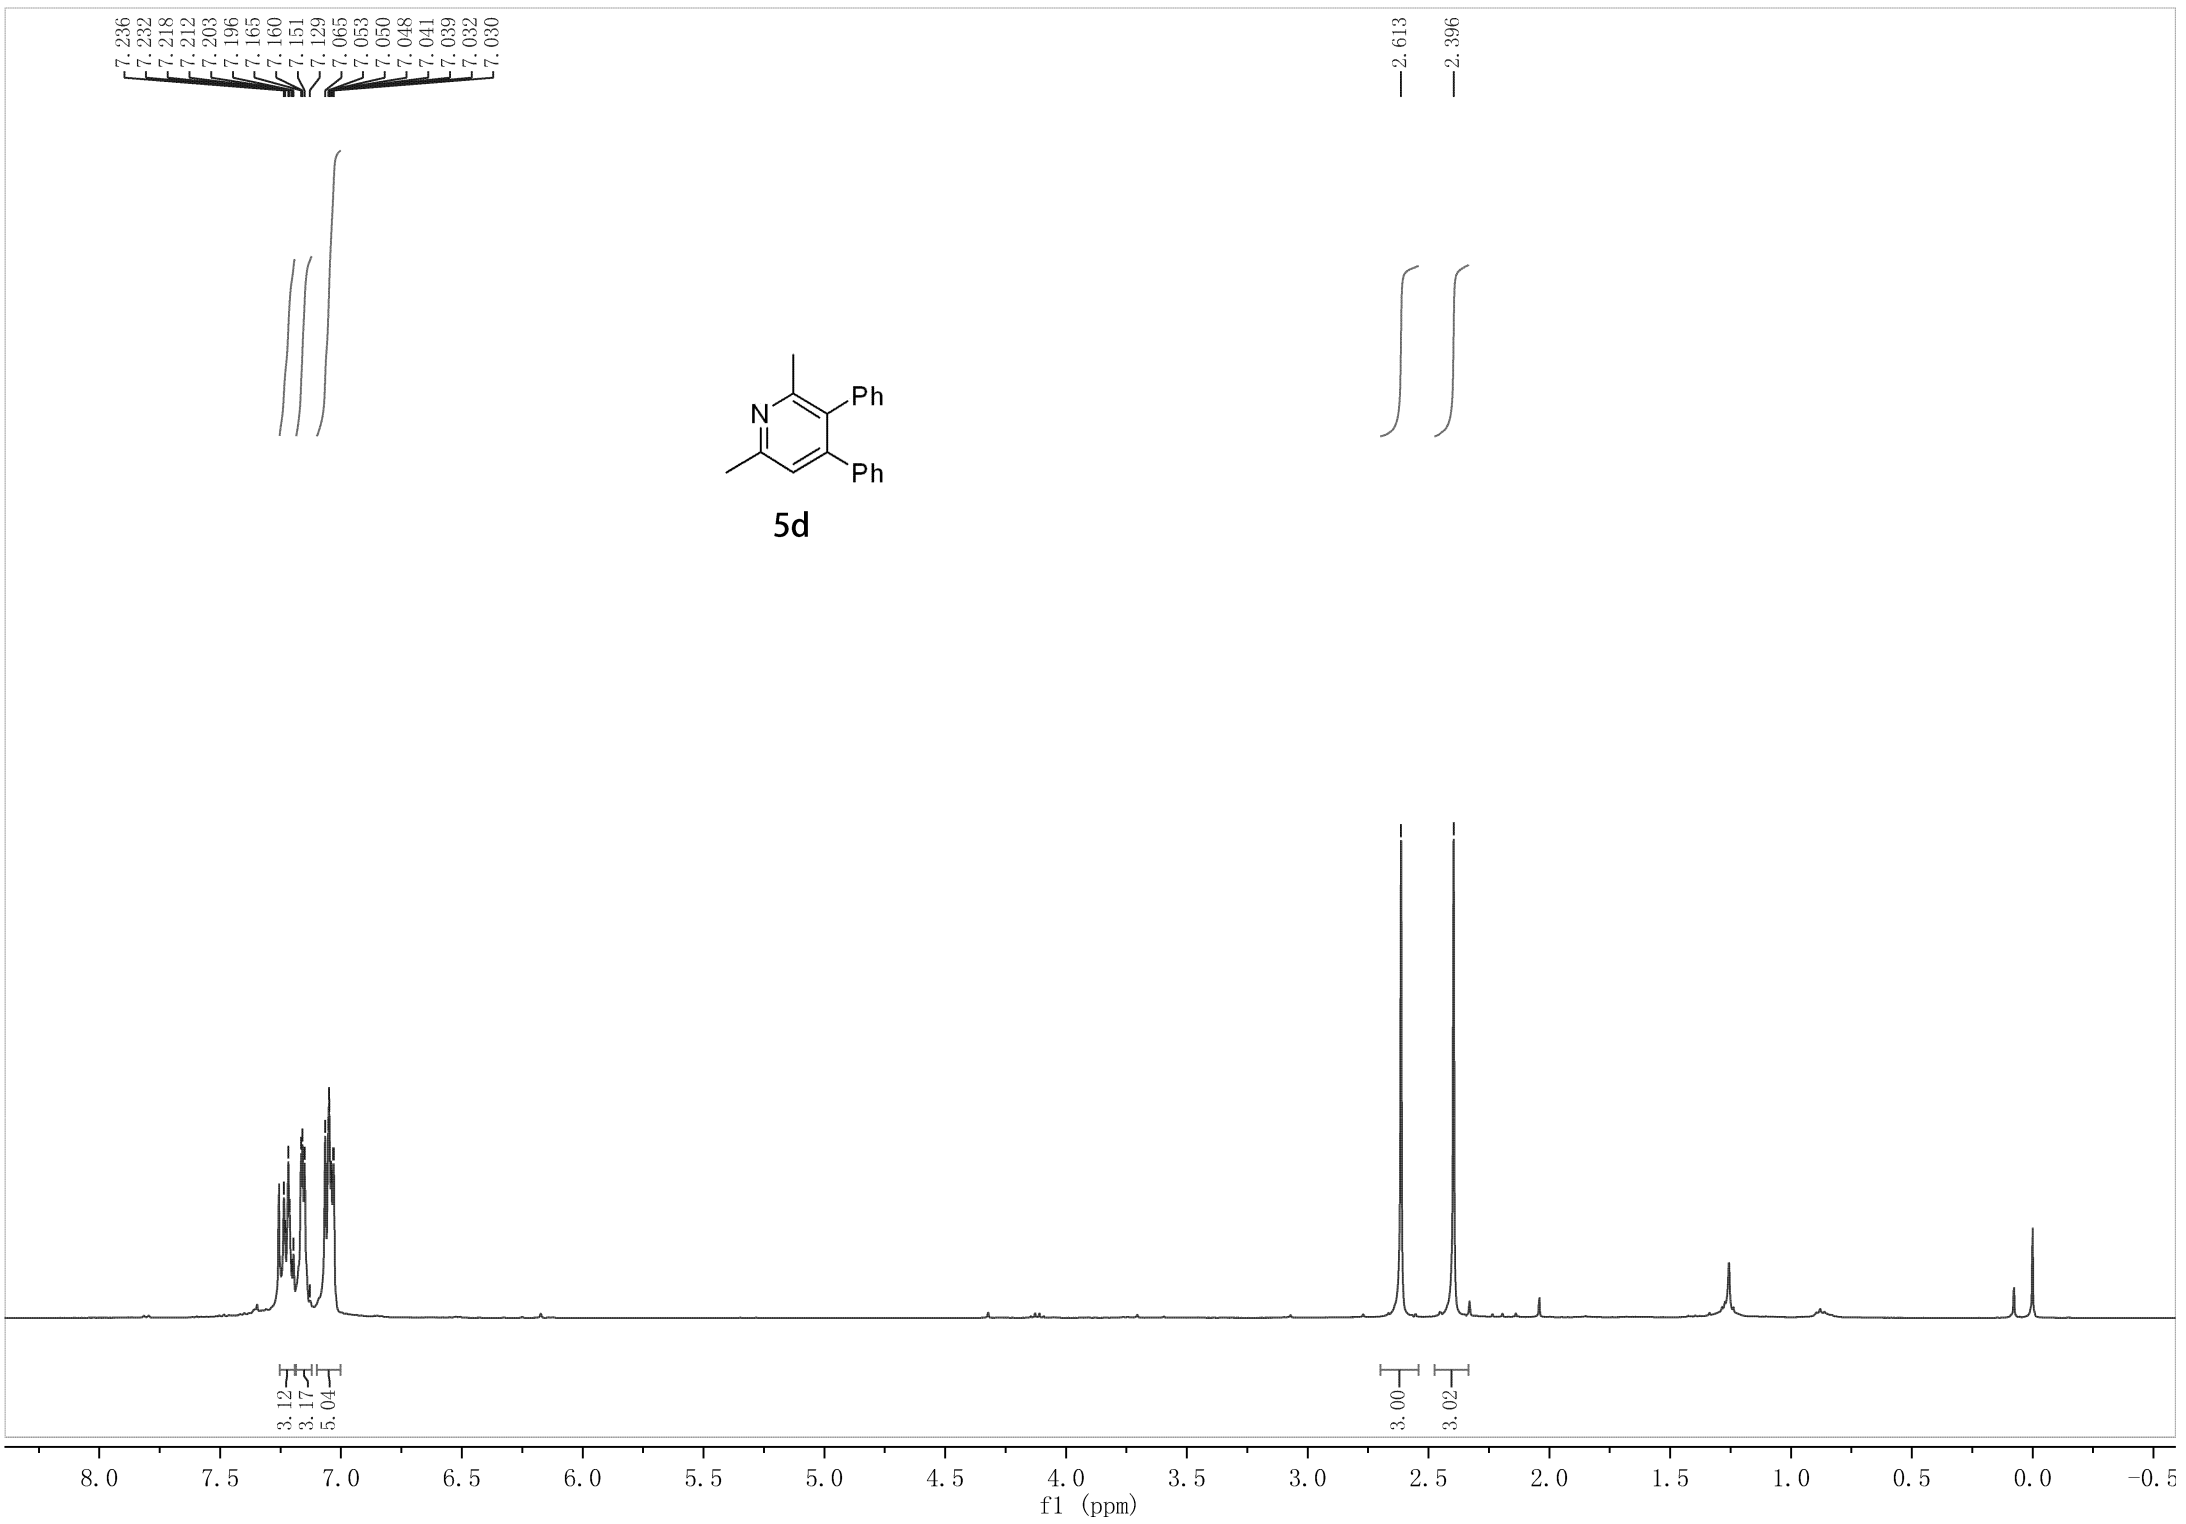

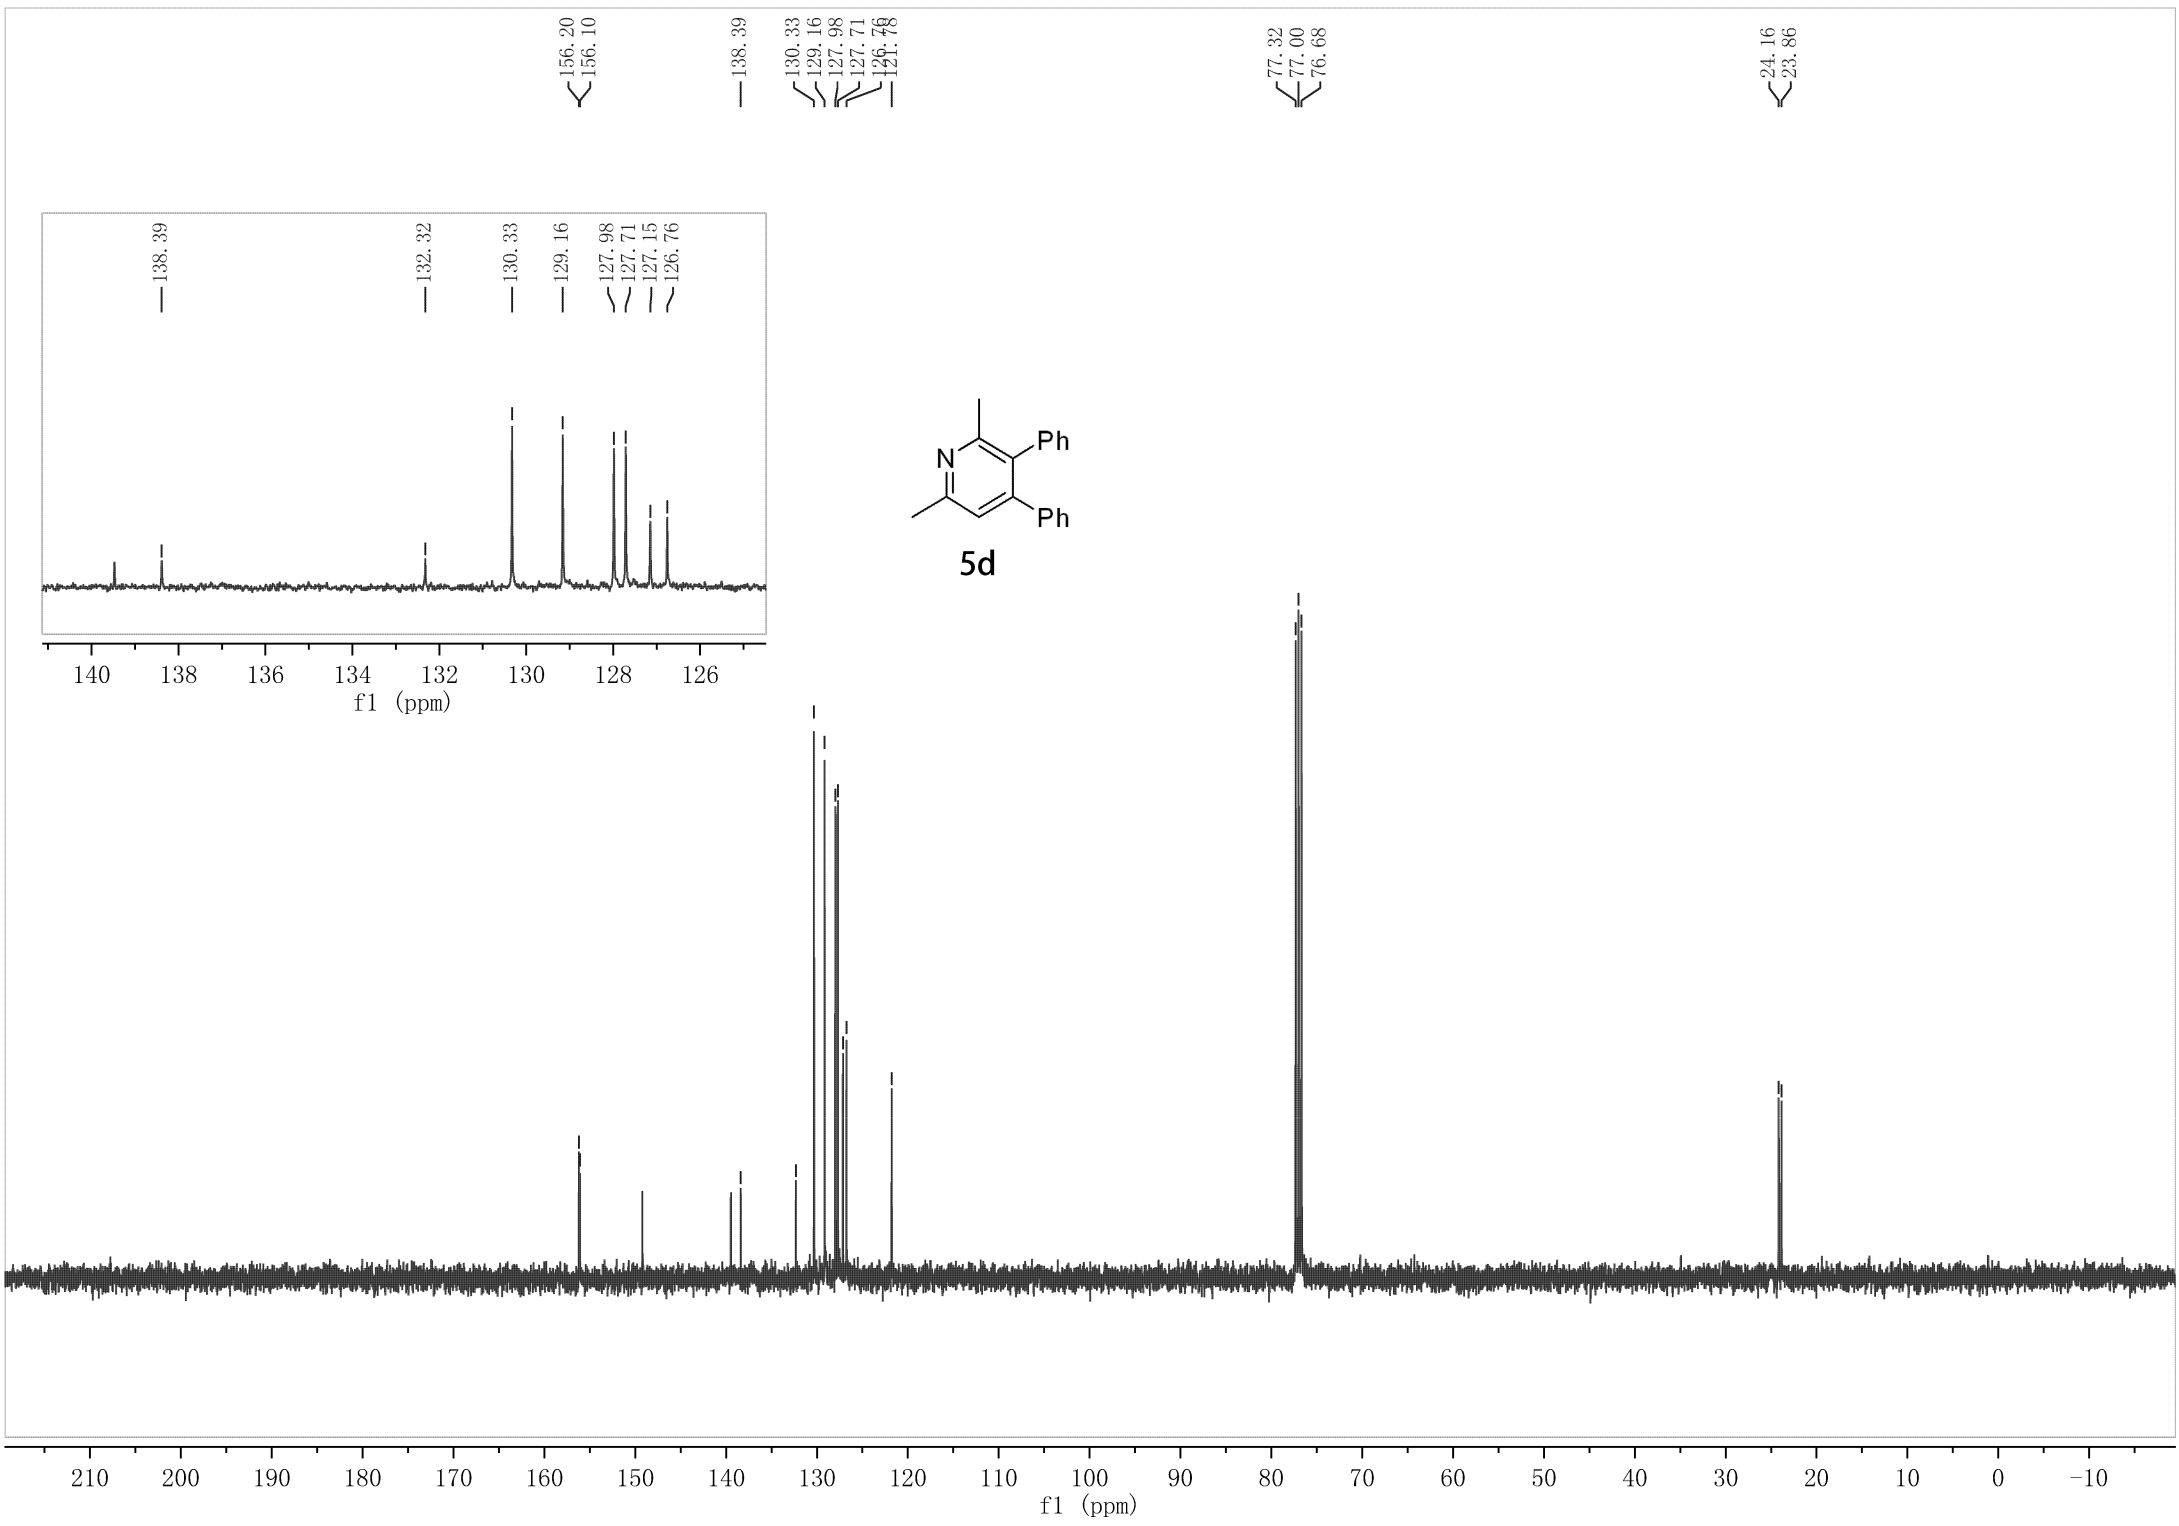

130.33  
129.16  
127.98  
127.71  
127.15  
126.76  
121.78

24.16  
23.86

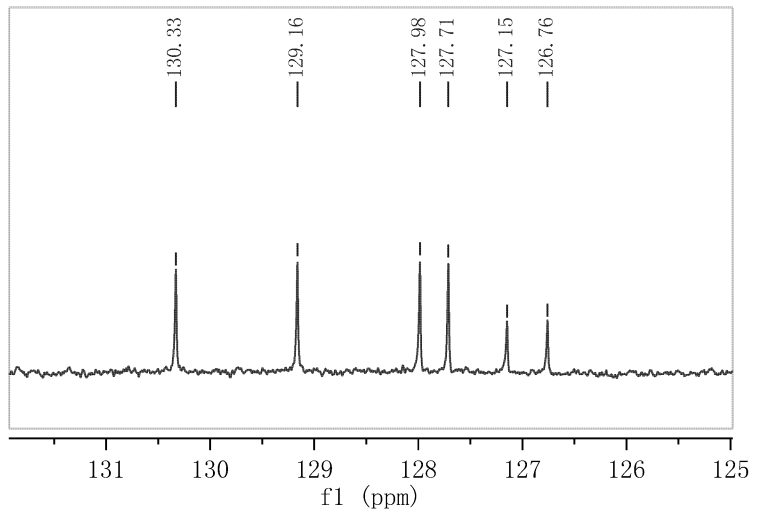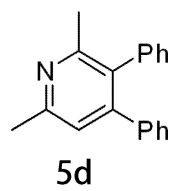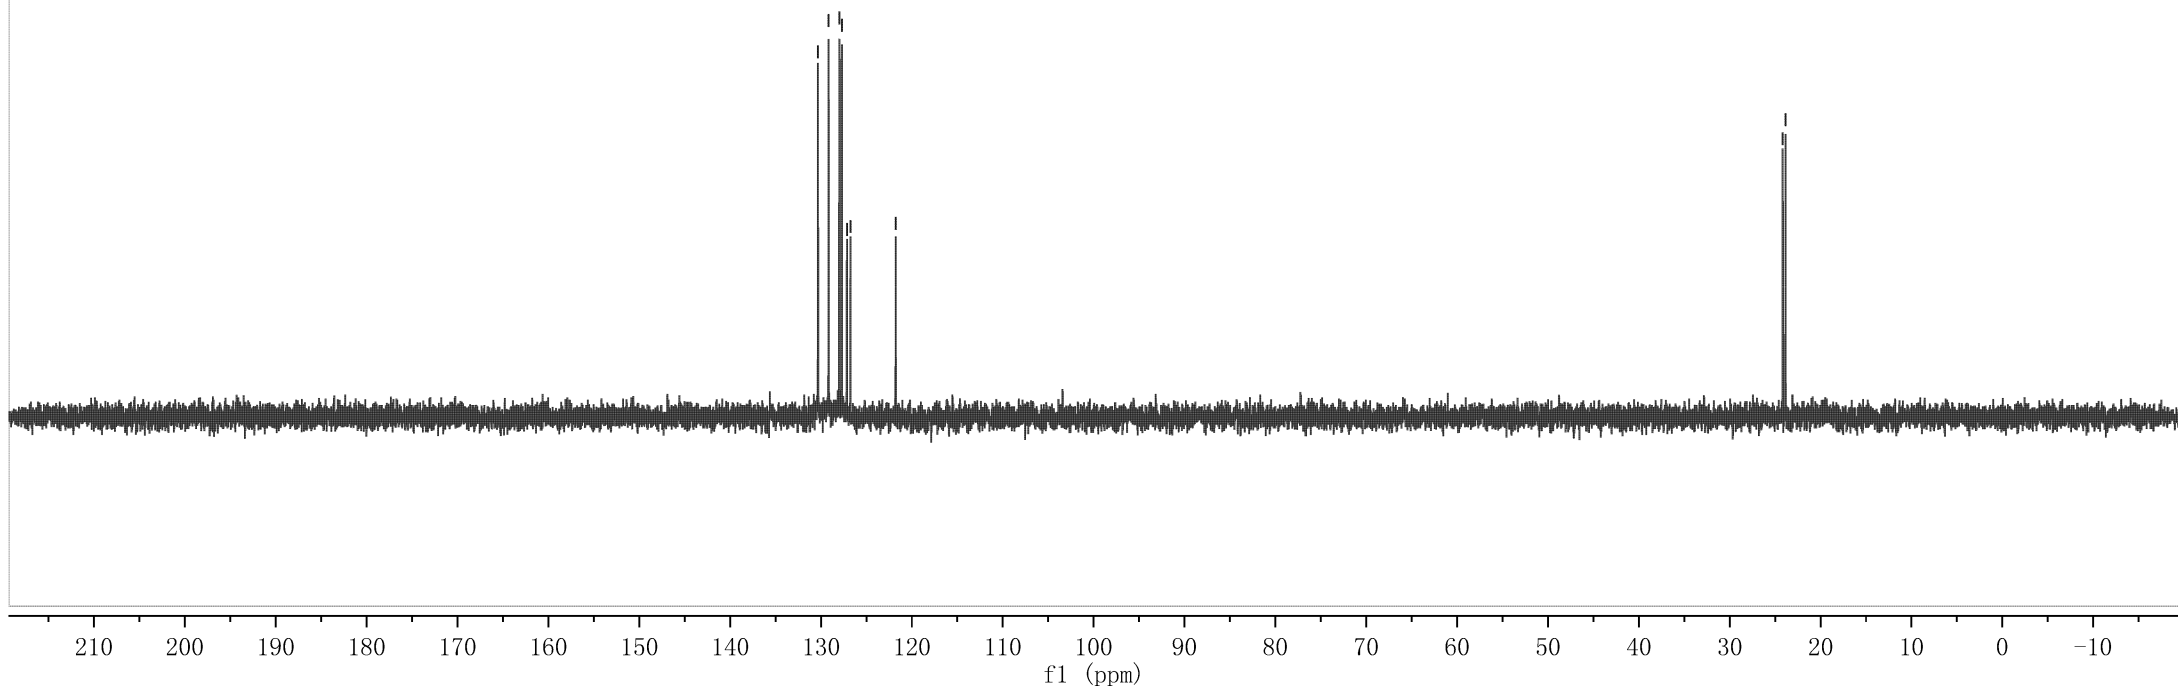

7.372  
7.354  
7.279  
7.275  
7.261  
7.242  
7.193  
7.174  
7.156

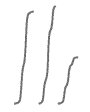

1.92  
2.03  
0.96

4.162

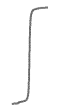

2.00

2.438

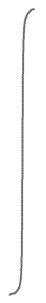

5.94

2.163

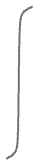

3.16

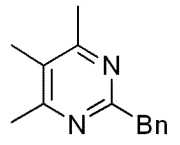

5e

5 8.0 7.5 7.0 6.5 6.0 5.5 5.0 4.5 4.0 3.5 3.0 2.5 2.0 1.5 1.0 0.5 0.0 -0.5  
f1 (nm)

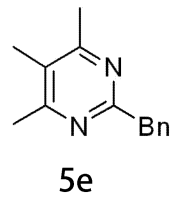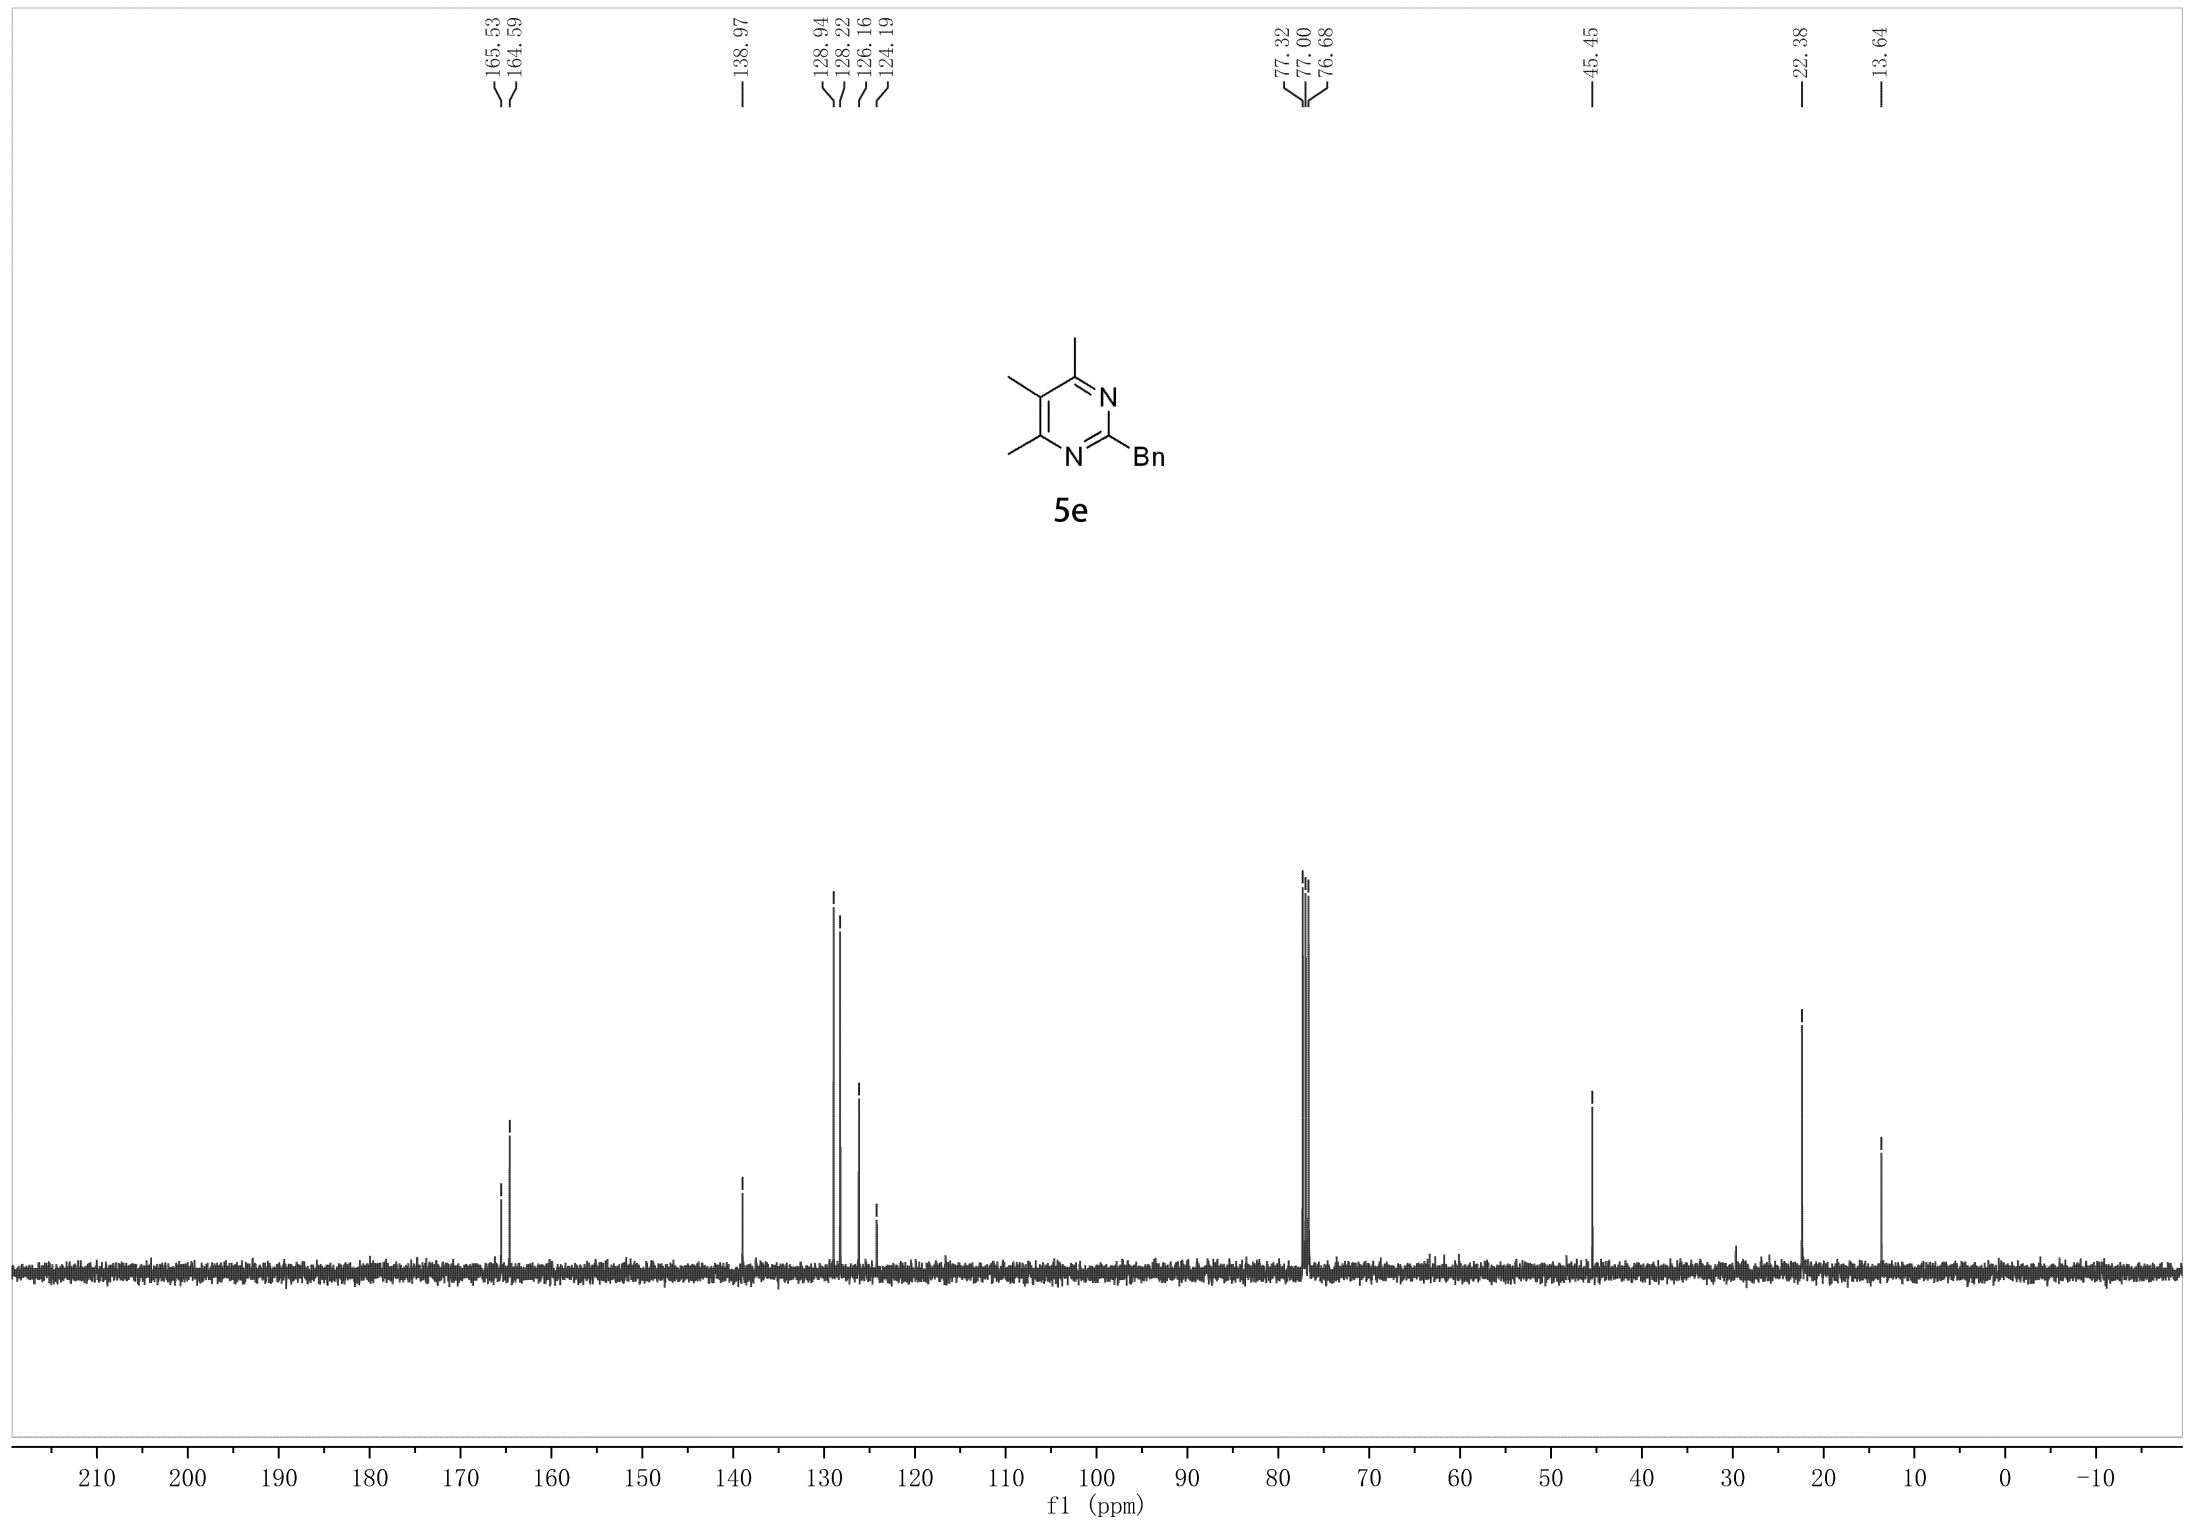

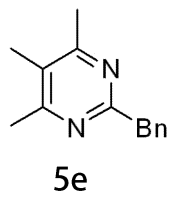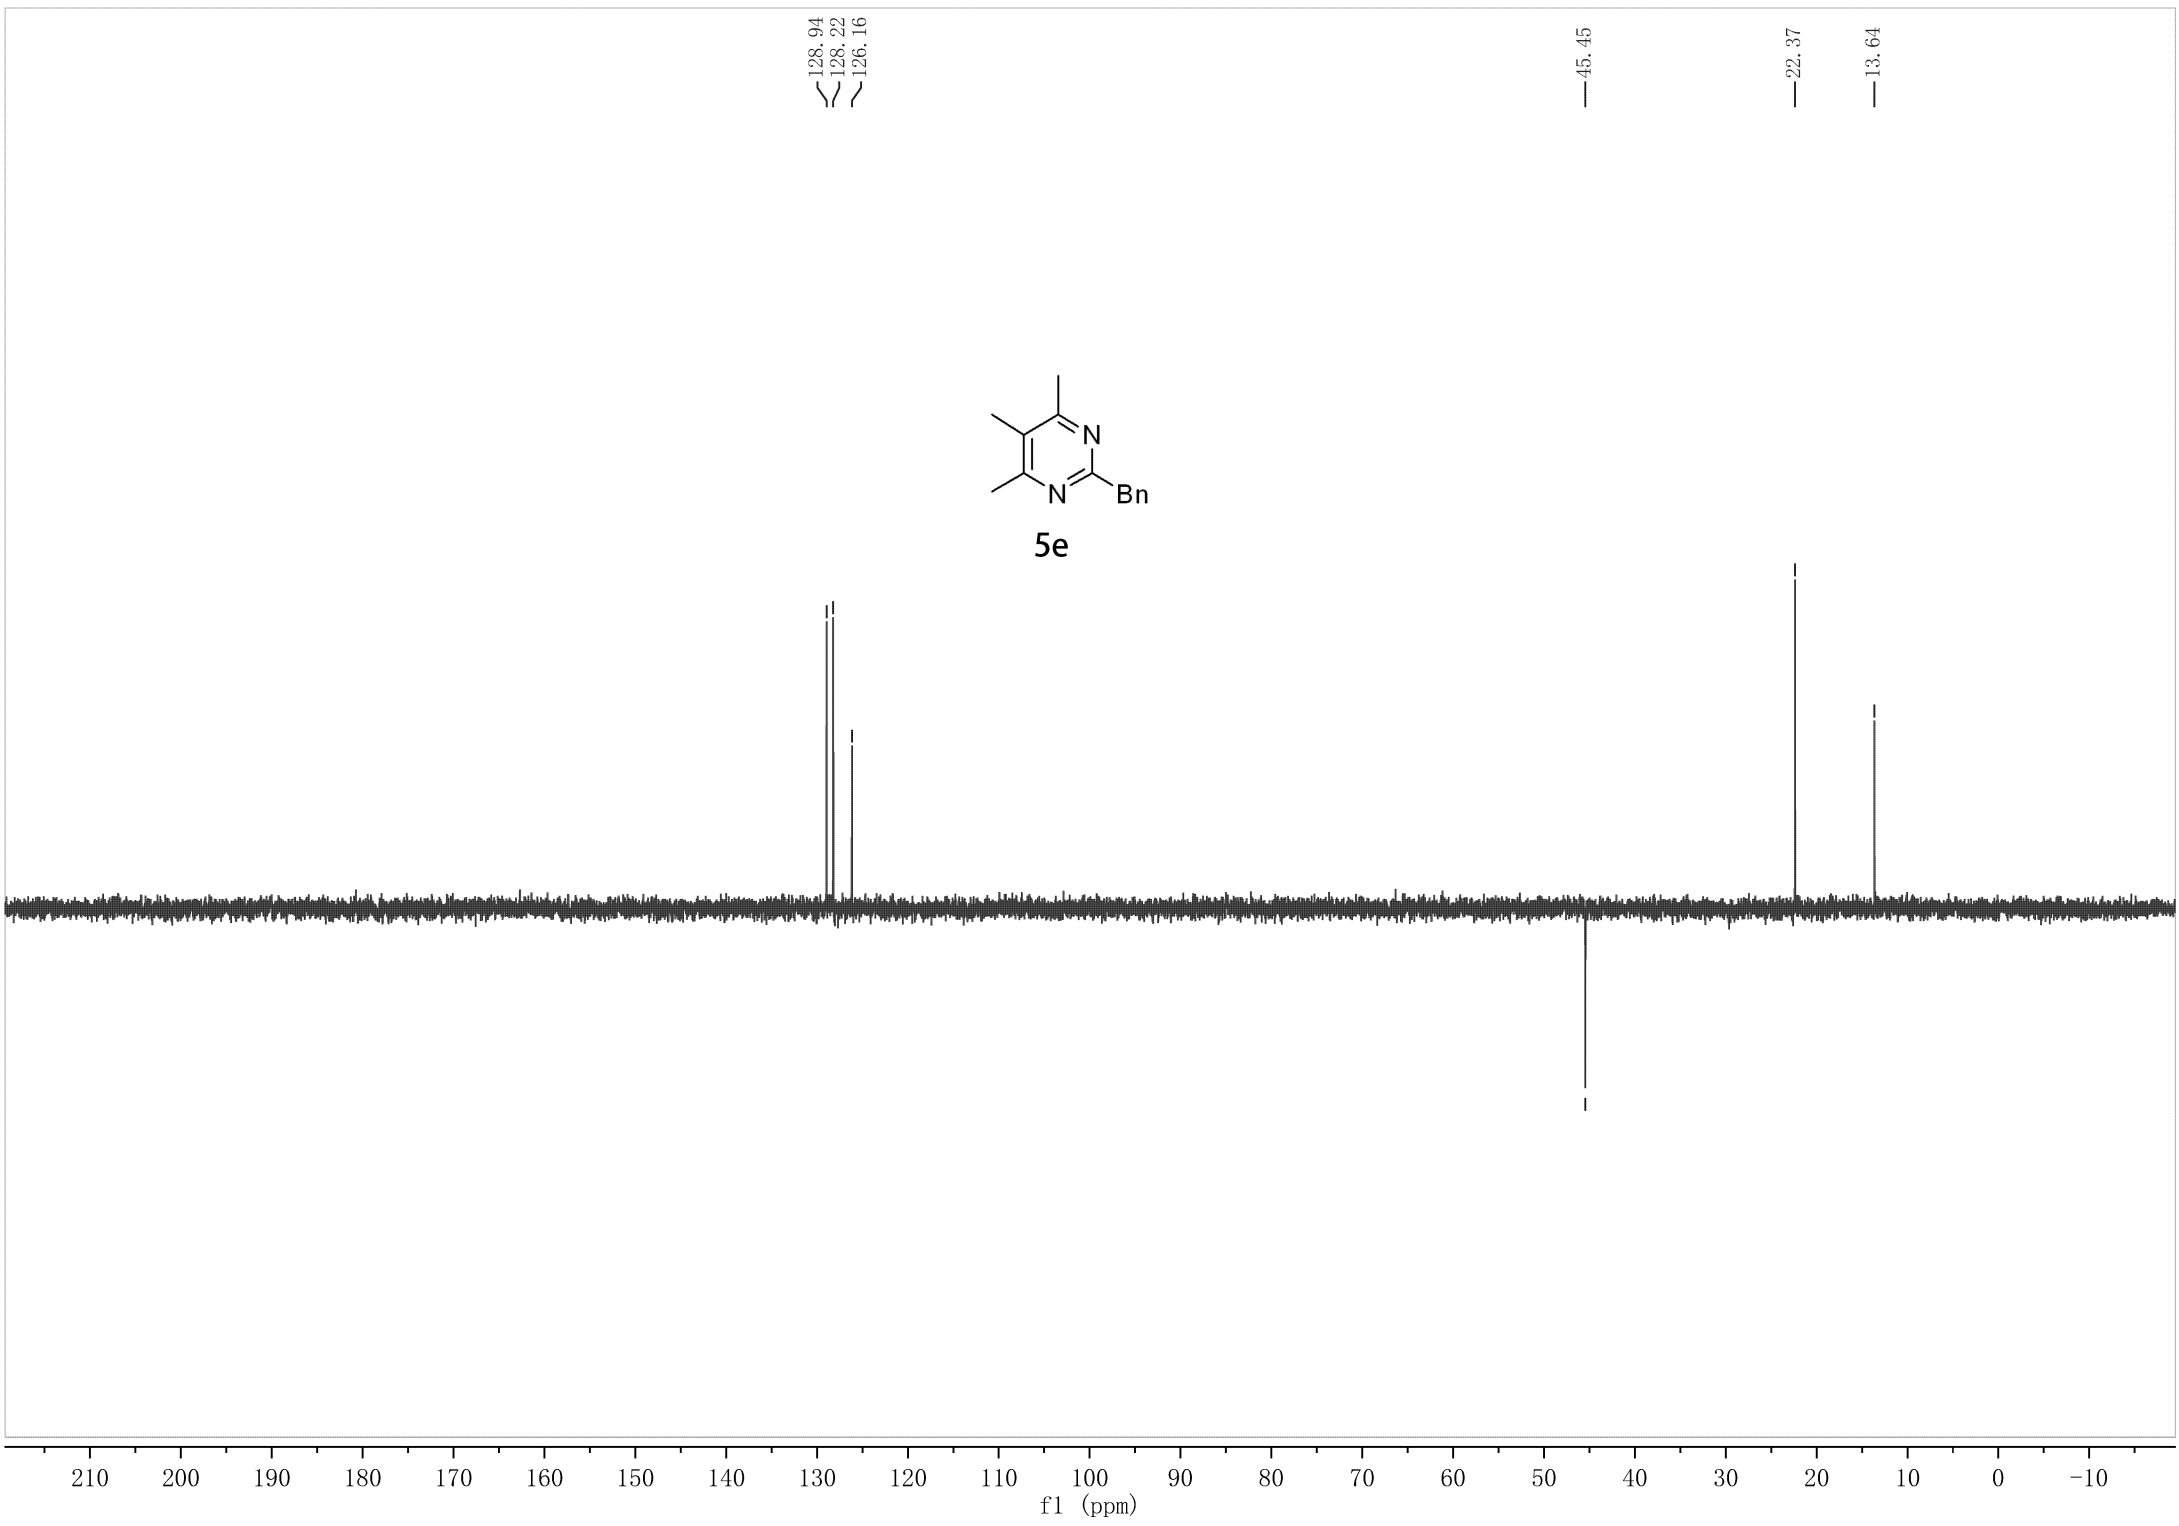

Supplement: c8cc03140a1.pdf [file c8cc03140a1.pdf]
